# Supplementary material for: Cytoplasmic dynein-1 cargo diversity is mediated by the combinatorial assembly of FTS-Hook-FHIP complexes
Source: bioRxiv preprint, doi:10.1101/2021.10.07.463551, version 1 (2021-10-08)
Supplement: Supplemental Table 1 [file 463551_file02.xlsx]

## Sheet: FHIP1A-C
				FHIP1A-BioID										BioID control
				Normalized Spectral Abundance Factor (NSAF)					Spectral Counts					Normalized Spectral Abundance Factor (NSAF)					Spectral Counts
NCBI_Gene	Description	enrichment ratio	p-value	NSAF 1	NSAF 2	NSAF 3	NSAF 4	avg NSAF	SC 1	SC 2	SC 3	SC 4	avg SCs	NSAF 1	NSAF 2	NSAF 3	NSAF 4	avg NSAF	SC 1	SC 2	SC 3	SC 4	avg SCs
SSBP1	Single-stranded DNA-binding protein, mitochondrial OS=Homo sapiens GN=SSBP1 PE=1 SV=1	∞	5.31002e-09	0.0087954	0.0094049	0.0089023	0.0085218	0.0089061	15	19	19	19	18	0	0	0	0	0	0	0	0	0	0
SNX3	Sorting nexin-3 OS=Homo sapiens GN=SNX3 PE=1 SV=3	∞	5.229e-08	0.0042855	0.0045222	0.0047086	0.0040975	0.00440345	8	10	11	10	9.75	0	0	0	0	0	0	0	0	0	0
KIF5C	Kinesin heavy chain isoform 5C OS=Homo sapiens GN=KIF5C PE=1 SV=1	∞	2.25566e-06	0.001995	0.00222	0.0026086	0.0024277	0.00231283	48	60	70	69	61.75	0	0	0	0	0	0	0	0	0	0
ERC1	ELKS/Rab6-interacting/CAST family member 1 OS=Homo sapiens GN=ERC1 PE=1 SV=1	∞	2.43637e-06	0.0013219	0.0015755	0.0014291	0.0017249	0.00151285	17	24	23	29	23.25	0	0	0	0	0	0	0	0	0	0
ECE1	Endothelin-converting enzyme 1 OS=Homo sapiens GN=ECE1 PE=1 SV=2	∞	1.56915e-05	0.00078892	0.0011417	0.0010807	0.0011207	0.00103301	7	12	12	13	11	0	0	0	0	0	0	0	0	0	0
LNPEP	Leucyl-cystinyl aminopeptidase OS=Homo sapiens GN=LNPEP PE=1 SV=3	∞	1.80634e-05	0.00076199	0.0011436	0.00094714	0.00097142	0.000956038	9	16	14	15	13.5	0	0	0	0	0	0	0	0	0	0
TFRC	Transferrin receptor protein 1 OS=Homo sapiens GN=TFRC PE=1 SV=2	∞	0.000176851	0.00034256	0.00048197	0.00027373	0.00043671	0.000383743	3	5	3	5	4	0	0	0	0	0	0	0	0	0	0
FAM160A2	FTS and Hook-interacting protein OS=Homo sapiens GN=FAM160A2 PE=1 SV=3	∞	0.000492894	0.00062497	0.0011305	0.0012842	0.0008878	0.000981867	7	15	18	13	13.25	0	0	0	0	0	0	0	0	0	0
TMEM161A	Transmembrane protein 161A OS=Homo sapiens GN=TMEM161A PE=1 SV=1	∞	0.000747723	0.00054352	0.00076471	0.00086861	0.00041574	0.000648145	3	5	6	3	4.25	0	0	0	0	0	0	0	0	0	0
APPL1	DCC-interacting protein 13-alpha OS=Homo sapiens GN=APPL1 PE=1 SV=1	∞	0.00125202	0.000612	0.00072329	0.00068464	0.00028087	0.0005752	5	7	7	3	5.5	0	0	0	0	0	0	0	0	0	0
SHMT2	Serine hydroxymethyltransferase, mitochondrial OS=Homo sapiens GN=SHMT2 PE=1 SV=3	∞	0.00157562	0.00068874	0.0010175	0.0015135	0.00079024	0.00100249	4	7	11	6	7	0	0	0	0	0	0	0	0	0	0
CLEC16A	Protein CLEC16A OS=Homo sapiens GN=CLEC16A PE=1 SV=2	∞	0.00255815	0.00024724	0.00034786	0.00013171	0.00037823	0.00027626	3	5	2	6	4	0	0	0	0	0	0	0	0	0	0
FMC1	Protein FMC1 homolog OS=Homo sapiens GN=FMC1 PE=1 SV=2	∞	0.00264318	0.001536	0.0025933	0.003682	0.0017623	0.0023934	2	4	6	3	3.75	0	0	0	0	0	0	0	0	0	0
KLC3	Kinesin light chain 3 OS=Homo sapiens GN=KLC3 PE=1 SV=2	∞	0.00378891	0.00068874	0.00072678	0.0016511	0.0014488	0.00112886	7	11	15	19	13	0	0	0	0	0	0	0	0	0	0
SLC38A1	Sodium-coupled neutral amino acid transporter 1 OS=Homo sapiens GN=SLC38A1 PE=1 SV=1	∞	0.0057159	0.00071279	0.00045129	0.00028478	0.00027261	0.000430368	4	3	2	2	2.75	0	0	0	0	0	0	0	0	0	0
FASTKD5	FAST kinase domain-containing protein 5, mitochondrial OS=Homo sapiens GN=FASTKD5 PE=1 SV=1	∞	0.00573627	0.00045435	0.00038356	0.00018153	0.00017377	0.000298303	4	4	2	2	3	0	0	0	0	0	0	0	0	0	0
LRP2	Low-density lipoprotein receptor-related protein 2 OS=Homo sapiens GN=LRP2 PE=1 SV=3	∞	0.00767242	3.7285e-05	6.2951e-05	0.00011917	5.704e-05	6.91115e-05	2	4	8	4	4.5	0	0	0	0	0	0	0	0	0	0
CDC42EP1	Cdc42 effector protein 1 OS=Homo sapiens GN=CDC42EP1 PE=1 SV=1	∞	0.0155231	0.0004439	0.0013115	0.00088675	0.00033954	0.000745422	2	7	5	2	4	0	0	0	0	0	0	0	0	0	0
ATP9A	Probable phospholipid-transporting ATPase IIA OS=Homo sapiens GN=ATP9A PE=1 SV=3	∞	0.0243128	0	0.00013994	0.00013246	0.0001268	9.98e-05	0	2	2	2	1.5	0	0	0	0	0	0	0	0	0	0
PFDN1	Prefoldin subunit 1 OS=Homo sapiens GN=PFDN1 PE=1 SV=2	∞	0.0258029	0.0014227	0.001201	0.0011368	0	0.000940125	2	2	2	0	1.5	0	0	0	0	0	0	0	0	0	0
ANKRD27	Ankyrin repeat domain-containing protein 27 OS=Homo sapiens GN=ANKRD27 PE=1 SV=2	∞	0.0278786	0	0.00020931	0.00026417	0.00018966	0.000165785	0	3	4	3	2.5	0	0	0	0	0	0	0	0	0	0
SNX2	Sorting nexin-2 OS=Homo sapiens GN=SNX2 PE=1 SV=2	∞	0.030344	0	0.00056462	0.00040083	0.0003837	0.000337288	0	7	7	6	5	0	0	0	0	0	0	0	0	0	0
ARFGAP2	ADP-ribosylation factor GTPase-activating protein 2 OS=Homo sapiens GN=ARFGAP2 PE=1 SV=1	∞	0.0319878	0.00033314	0.00042184	0	0.00025482	0.00025245	2	3	0	2	1.75	0	0	0	0	0	0	0	0	0	0
SCAMP3	Secretory carrier-associated membrane protein 3 OS=Homo sapiens GN=SCAMP3 PE=1 SV=3	∞	0.037132	0	0.00042224	0.00079936	0.00076519	0.000496697	0	2	4	4	2.5	0	0	0	0	0	0	0	0	0	0
AP4E1	AP-4 complex subunit epsilon-1 OS=Homo sapiens GN=AP4E1 PE=1 SV=2	∞	0.0494622	0	0.0001933	0.00036593	0.00017515	0.000183595	0	3	6	3	3	0	0	0	0	0	0	0	0	0	0
KIF5A	Kinesin heavy chain isoform 5A OS=Homo sapiens GN=KIF5A PE=1 SV=2	∞	0.134127	0	0	0.00020158	0.00019297	9.86375e-05	0	0	35	34	17.25	0	0	0	0	0	0	0	0	0	0
SNX30	Sorting nexin-30 OS=Homo sapiens GN=SNX30 PE=1 SV=1	∞	0.134128	0	0	0.00047605	0.0004557	0.000232938	0	0	3	3	1.5	0	0	0	0	0	0	0	0	0	0
AP4B1	AP-4 complex subunit beta-1 OS=Homo sapiens GN=AP4B1 PE=1 SV=2	∞	0.134752	0	0.00039653	0	0.0003593	0.000188958	0	4	0	4	2	0	0	0	0	0	0	0	0	0	0
DLST	Dihydrolipoyllysine-residue succinyltransferase component of 2-oxoglutarate dehydrogenase complex, mitochondrial OS=Homo sapiens GN=DLST PE=1 SV=4	∞	0.134752	0	0.00048516	0	0.0004396	0.00023119	0	3	0	3	1.5	0	0	0	0	0	0	0	0	0	0
PKP1	Plakophilin-1 OS=Homo sapiens GN=PKP1 PE=1 SV=2	∞	0.13626	0.00023235	0.00019614	0	0	0.000107123	2	2	0	0	1	0	0	0	0	0	0	0	0	0	0
OCRL	Inositol polyphosphate 5-phosphatase OCRL-1 OS=Homo sapiens GN=OCRL PE=1 SV=3	∞	0.136585	0.00019263	0	0.00023089	0	0.00010588	2	0	3	0	1.25	0	0	0	0	0	0	0	0	0	0
ILVBL	Acetolactate synthase-like protein OS=Homo sapiens GN=ILVBL PE=1 SV=2	∞	0.138261	0	0.00034775	0.00043889	0	0.00019666	0	3	4	0	1.75	0	0	0	0	0	0	0	0	0	0
HLA-B	HLA class I histocompatibility antigen, B-7 alpha chain OS=Homo sapiens GN=HLA-B PE=1 SV=3	∞	0.138678	0	0	0.00057468	0.00073348	0.00032704	0	0	3	4	1.75	0	0	0	0	0	0	0	0	0	0
AP4M1	AP-4 complex subunit mu-1 OS=Homo sapiens GN=AP4M1 PE=1 SV=2	∞	0.139632	0.00057471	0	0	0.0004396	0.000253578	3	0	0	3	1.5	0	0	0	0	0	0	0	0	0	0
ATP13A3	Probable cation-transporting ATPase 13A3 OS=Homo sapiens GN=ATP13A3 PE=1 SV=4	∞	0.14353	0	0.00011951	0.00016968	0	7.22975e-05	0	2	3	0	1.25	0	0	0	0	0	0	0	0	0	0
SLC25A6	ADP/ATP translocase 3 OS=Homo sapiens GN=SLC25A6 PE=1 SV=4	∞	0.143532	0	0.00049167	0.0006981	0	0.000297443	0	15	16	0	7.75	0	0	0	0	0	0	0	0	0	0
KRT77	Keratin, type II cytoskeletal 1b OS=Homo sapiens GN=KRT77 PE=1 SV=3	∞	0.143532	0	0.00025349	0.00035992	0	0.000153352	0	14	15	0	7.25	0	0	0	0	0	0	0	0	0	0
COX4I1	Cytochrome c oxidase subunit 4 isoform 1, mitochondrial OS=Homo sapiens GN=COX4I1 PE=1 SV=1	∞	0.144131	0	0	0.00082064	0.0011783	0.000499735	0	0	2	3	1.25	0	0	0	0	0	0	0	0	0	0
GCDH	Glutaryl-CoA dehydrogenase, mitochondrial OS=Homo sapiens GN=GCDH PE=1 SV=1	∞	0.14936	0	0	0.00047496	0.00030311	0.000194518	0	0	3	2	1.25	0	0	0	0	0	0	0	0	0	0
P4HA1	Prolyl 4-hydroxylase subunit alpha-1 OS=Homo sapiens GN=P4HA1 PE=1 SV=2	∞	0.149362	0	0	0.00038957	0.00024861	0.000159545	0	0	3	2	1.25	0	0	0	0	0	0	0	0	0	0
MRPS12	28S ribosomal protein S12, mitochondrial OS=Homo sapiens GN=MRPS12 PE=1 SV=1	∞	0.1501	0	0.0015926	0.001005	0	0.0006494	0	3	2	0	1.25	0	0	0	0	0	0	0	0	0	0
KRT3	Keratin, type II cytoskeletal 3 OS=Homo sapiens GN=KRT3 PE=1 SV=3	∞	0.1501	0	0.00034996	0.00022084	0	0.0001427	0	21	16	0	9.25	0	0	0	0	0	0	0	0	0	0
IDH3B	Isocitrate dehydrogenase [NAD] subunit beta, mitochondrial OS=Homo sapiens GN=IDH3B PE=1 SV=2	∞	0.1501	0	0.00057085	0.00036023	0	0.00023277	0	3	2	0	1.25	0	0	0	0	0	0	0	0	0	0
CHP1	Calcineurin B homologous protein 1 OS=Homo sapiens GN=CHP1 PE=1 SV=3	∞	0.156832	0	0	0.0017781	0.0010212	0.000699825	0	0	5	3	2	0	0	0	0	0	0	0	0	0	0
SNX4	Sorting nexin-4 OS=Homo sapiens GN=SNX4 PE=1 SV=1	∞	0.158398	0.00057855	0.0003256	0	0	0.000226038	3	2	0	0	1.25	0	0	0	0	0	0	0	0	0	0
KIF1BP	KIF1-binding protein OS=Homo sapiens GN=KIF1BP PE=1 SV=1	∞	0.162825	0.00041924	0	0.00022333	0	0.000160642	3	0	2	0	1.25	0	0	0	0	0	0	0	0	0	0
ARHGAP1	Rho GTPase-activating protein 1 OS=Homo sapiens GN=ARHGAP1 PE=1 SV=1	∞	0.193445	0.00079072	0	0	0.00030241	0.000273282	4	0	0	2	1.5	0	0	0	0	0	0	0	0	0	0
PRMT5	Protein arginine N-methyltransferase 5 OS=Homo sapiens GN=PRMT5 PE=1 SV=4	∞	0.355918	0	0.00023001	0	0	5.75025e-05	0	2	0	0	0.5	0	0	0	0	0	0	0	0	0	0
CWC25	Pre-mRNA-splicing factor CWC25 homolog OS=Homo sapiens GN=CWC25 PE=1 SV=1	∞	0.355918	0	0	0.00032633	0	8.15825e-05	0	0	2	0	0.5	0	0	0	0	0	0	0	0	0	0
KRT4	Keratin, type II cytoskeletal 4 OS=Homo sapiens GN=KRT4 PE=1 SV=4	∞	0.355918	0	0	0.00038957	0	9.73925e-05	0	0	12	0	3	0	0	0	0	0	0	0	0	0	0
NINL	Ninein-like protein OS=Homo sapiens GN=NINL PE=1 SV=2	∞	0.355918	0	0	0.00035124	0	8.781e-05	0	0	7	0	1.75	0	0	0	0	0	0	0	0	0	0
KRT34	Keratin, type I cuticular Ha4 OS=Homo sapiens GN=KRT34 PE=1 SV=2	∞	0.355918	0	0.0006721	0	0	0.000168025	0	16	0	0	4	0	0	0	0	0	0	0	0	0	0
ALDH18A1	Delta-1-pyrroline-5-carboxylate synthase OS=Homo sapiens GN=ALDH18A1 PE=1 SV=2	∞	0.355918	0	0	0	0.00016699	4.17475e-05	0	0	0	2	0.5	0	0	0	0	0	0	0	0	0	0
CDKN2A	Tumor suppressor ARF OS=Homo sapiens GN=CDKN2A PE=1 SV=2	∞	0.355918	0	0	0	0.0010058	0.00025145	0	0	0	2	0.5	0	0	0	0	0	0	0	0	0	0
TARS2	Threonine--tRNA ligase, mitochondrial OS=Homo sapiens GN=TARS2 PE=1 SV=1	∞	0.355918	0	0	0.00019316	0	4.829e-05	0	0	2	0	0.5	0	0	0	0	0	0	0	0	0	0
RIMBP3	RIMS-binding protein 3A OS=Homo sapiens GN=RIMBP3 PE=1 SV=4	∞	0.355918	0	0	0	8.1001e-05	2.02503e-05	0	0	0	2	0.5	0	0	0	0	0	0	0	0	0	0
SIGMAR1	Sigma non-opioid intracellular receptor 1 OS=Homo sapiens GN=SIGMAR1 PE=1 SV=1	∞	0.355918	0	0.00065703	0	0	0.000164257	0	2	0	0	0.5	0	0	0	0	0	0	0	0	0	0
LYZ	Lysozyme C OS=Homo sapiens GN=LYZ PE=1 SV=1	∞	0.355918	0	0	0.00093708	0	0.00023427	0	0	2	0	0.5	0	0	0	0	0	0	0	0	0	0
MAIP1	m-AAA protease-interacting protein 1, mitochondrial OS=Homo sapiens GN=MAIP1 PE=1 SV=1	∞	0.355918	0	0	0	0.00045622	0.000114055	0	0	0	2	0.5	0	0	0	0	0	0	0	0	0	0
PIGS	GPI transamidase component PIG-S OS=Homo sapiens GN=PIGS PE=1 SV=3	∞	0.355918	0	0	0	0.00023921	5.98025e-05	0	0	0	2	0.5	0	0	0	0	0	0	0	0	0	0
ADGRL2	Adhesion G protein-coupled receptor L2 OS=Homo sapiens GN=ADGRL2 PE=1 SV=2	∞	0.355918	0	0	0	9.0994e-05	2.27485e-05	0	0	0	2	0.5	0	0	0	0	0	0	0	0	0	0
KRT83	Keratin, type II cuticular Hb3 OS=Homo sapiens GN=KRT83 PE=1 SV=2	∞	0.355918	0	0.0004458	0	0	0.00011145	0	25	0	0	6.25	0	0	0	0	0	0	0	0	0	0
HBA1	Hemoglobin subunit alpha OS=Homo sapiens GN=HBA1 PE=1 SV=2	∞	0.355918	0	0	0.0073251	0	0.00183128	0	0	15	0	3.75	0	0	0	0	0	0	0	0	0	0
DSC1	Desmocollin-1 OS=Homo sapiens GN=DSC1 PE=1 SV=2	∞	0.355918	0	0.00032778	0	0	8.1945e-05	0	4	0	0	1	0	0	0	0	0	0	0	0	0	0
KRT31	Keratin, type I cuticular Ha1 OS=Homo sapiens GN=KRT31 PE=1 SV=3	∞	0.355918	0	0.0019371	0	0	0.000484275	0	28	0	0	7	0	0	0	0	0	0	0	0	0	0
THEM6	Protein THEM6 OS=Homo sapiens GN=THEM6 PE=1 SV=2	∞	0.355918	0	0.0014088	0	0	0.0003522	0	4	0	0	1	0	0	0	0	0	0	0	0	0	0
SNAP29	Synaptosomal-associated protein 29 OS=Homo sapiens GN=SNAP29 PE=1 SV=1	∞	0.355918	0	0	0	0.00051457	0.000128643	0	0	0	2	0.5	0	0	0	0	0	0	0	0	0	0
RRM2	Ribonucleoside-diphosphate reductase subunit M2 OS=Homo sapiens GN=RRM2 PE=1 SV=1	∞	0.355918	0	0	0	0.00034129	8.53225e-05	0	0	0	2	0.5	0	0	0	0	0	0	0	0	0	0
ATP5J2	ATP synthase subunit f, mitochondrial OS=Homo sapiens GN=ATP5J2 PE=1 SV=3	∞	0.355918	0	0.0015587	0	0	0.000389675	0	2	0	0	0.5	0	0	0	0	0	0	0	0	0	0
KRT33A	Keratin, type I cuticular Ha3-I OS=Homo sapiens GN=KRT33A PE=2 SV=2	∞	0.355918	0	0.00036267	0	0	9.06675e-05	0	22	0	0	5.5	0	0	0	0	0	0	0	0	0	0
FAM133B	Protein FAM133B OS=Homo sapiens GN=FAM133B PE=1 SV=1	∞	0.355918	0	0	0	0.00053749	0.000134372	0	0	0	2	0.5	0	0	0	0	0	0	0	0	0	0
STX7	Syntaxin-7 OS=Homo sapiens GN=STX7 PE=1 SV=4	∞	0.355918	0	0	0	0.00076299	0.000190747	0	0	0	3	0.75	0	0	0	0	0	0	0	0	0	0
RABGAP1	Rab GTPase-activating protein 1 OS=Homo sapiens GN=RABGAP1 PE=1 SV=3	∞	0.355918	0	0	0	0.00012419	3.10475e-05	0	0	0	2	0.5	0	0	0	0	0	0	0	0	0	0
VKORC1	Vitamin K epoxide reductase complex subunit 1 OS=Homo sapiens GN=VKORC1 PE=1 SV=1	∞	0.355918	0	0.00089889	0	0	0.000224722	0	2	0	0	0.5	0	0	0	0	0	0	0	0	0	0
STIL	SCL-interrupting locus protein OS=Homo sapiens GN=STIL PE=1 SV=2	∞	0.355918	0	0.00011385	0	0	2.84625e-05	0	2	0	0	0.5	0	0	0	0	0	0	0	0	0	0
KRT82	Keratin, type II cuticular Hb2 OS=Homo sapiens GN=KRT82 PE=1 SV=3	∞	0.355918	0	0.00057122	0	0	0.000142805	0	5	0	0	1.25	0	0	0	0	0	0	0	0	0	0
KRT32	Keratin, type I cuticular Ha2 OS=Homo sapiens GN=KRT32 PE=2 SV=3	∞	0.355918	0	0.0006541	0	0	0.000163525	0	8	0	0	2	0	0	0	0	0	0	0	0	0	0
IGHA1	Immunoglobulin heavy constant alpha 1 OS=Homo sapiens GN=IGHA1 PE=1 SV=2	∞	0.355918	0	0	0.00078577	0	0.000196442	0	0	4	0	1	0	0	0	0	0	0	0	0	0	0
APOA1	Apolipoprotein A-I OS=Homo sapiens GN=APOA1 PE=1 SV=1	∞	0.355918	0	0	0.00077915	0	0.000194788	0	0	3	0	0.75	0	0	0	0	0	0	0	0	0	0
KRTAP4-3	Keratin-associated protein 4-3 OS=Homo sapiens GN=KRTAP4-3 PE=2 SV=2	∞	0.355918	0	0.00075138	0	0	0.000187845	0	2	0	0	0.5	0	0	0	0	0	0	0	0	0	0
KRTAP11-1	Keratin-associated protein 11-1 OS=Homo sapiens GN=KRTAP11-1 PE=1 SV=1	∞	0.355918	0	0.00089889	0	0	0.000224722	0	2	0	0	0.5	0	0	0	0	0	0	0	0	0	0
VSIG8	V-set and immunoglobulin domain-containing protein 8 OS=Homo sapiens GN=VSIG8 PE=2 SV=1	∞	0.355918	0	0.00035391	0	0	8.84775e-05	0	2	0	0	0.5	0	0	0	0	0	0	0	0	0	0
S100A7	Protein S100-A7 OS=Homo sapiens GN=S100A7 PE=1 SV=4	∞	0.355918	0.0034369	0	0	0	0.000859225	4	0	0	0	1	0	0	0	0	0	0	0	0	0	0
TMEM33	Transmembrane protein 33 OS=Homo sapiens GN=TMEM33 PE=1 SV=2	∞	0.355918	0.00070269	0	0	0	0.000175672	2	0	0	0	0.5	0	0	0	0	0	0	0	0	0	0
S100A8	Protein S100-A8 OS=Homo sapiens GN=S100A8 PE=1 SV=1	∞	0.355918	0.0037325	0	0	0	0.000933125	4	0	0	0	1	0	0	0	0	0	0	0	0	0	0
SLC16A1	Monocarboxylate transporter 1 OS=Homo sapiens GN=SLC16A1 PE=1 SV=3	∞	0.355918	0.00034713	0	0	0	8.67825e-05	2	0	0	0	0.5	0	0	0	0	0	0	0	0	0	0
RCE1	CAAX prenyl protease 2 OS=Homo sapiens GN=RCE1 PE=1 SV=1	∞	0.355918	0.00052755	0	0	0	0.000131888	2	0	0	0	0.5	0	0	0	0	0	0	0	0	0	0
FAM160A1	Protein FAM160A1 OS=Homo sapiens GN=FAM160A1 PE=2 SV=2	676.545	4.39985e-08	0.091872	0.086784	0.083746	0.095613	0.0895037	1101	1232	1256	1498	1271.75	7.8331e-05	0.00014525	0.00015821	0.00014739	0.000132295	2	4	4	4	3.5
AKTIP	AKT-interacting protein OS=Homo sapiens GN=AKTIP PE=1 SV=1	49.9259	2.63679e-06	0.0074299	0.0060213	0.005937	0.0068199	0.00655203	25	24	25	30	26	0	0	0	0.00052494	0.000131235	0	0	0	4	1
HOOK3	Protein Hook homolog 3 OS=Homo sapiens GN=HOOK3 PE=1 SV=2	47.8513	1.49389e-08	0.0089441	0.0081626	0.0081127	0.0086904	0.00847745	75	80	86	96	84.25	0.00017019	0.00021039	0.00011458	0.00021349	0.000177163	3	4	2	4	3.25
SNX1	Sorting nexin-1 OS=Homo sapiens GN=SNX1 PE=1 SV=3	24.2085	2.90716e-06	0.001995	0.0025262	0.0021255	0.0021618	0.00220213	12	18	16	17	15.75	0	0.00021704	0	0.00014682	9.0965e-05	0	3	0	2	1.25
KLC4	Kinesin light chain 4 OS=Homo sapiens GN=KLC4 PE=1 SV=3	22.2959	1.30992e-07	0.0033647	0.0029588	0.0030247	0.0032171	0.00314133	29	31	35	40	33.75	0	0.00018303	0.00013291	0.00024763	0.000140892	0	5	4	5	3.5
IGF2R	Cation-independent mannose-6-phosphate receptor OS=Homo sapiens GN=IGF2R PE=1 SV=3	19.2405	1.4971e-09	0.0012542	0.0012352	0.0011692	0.0012258	0.0012211	36	42	42	46	41.5	6.5407e-05	4.5482e-05	6.6053e-05	7.6918e-05	6.3465e-05	4	3	4	5	4
HOOK1	Protein Hook homolog 1 OS=Homo sapiens GN=HOOK1 PE=1 SV=2	19.0315	3.75329e-06	0.025629	0.021636	0.021337	0.026899	0.0238753	215	215	224	295	237.25	0.00083926	0.0013488	0.0013561	0.0014739	0.00125452	15	26	24	28	23.25
S100A9	Protein S100-A9 OS=Homo sapiens GN=S100A9 PE=1 SV=1	16.2238	0.0836941	0.0068512	0.0012853	0.0018248	0.0017468	0.00292702	9	2	3	3	4.25	0	0	0.00072166	0	0.000180415	0	0	2	0	0.5
KLC2	Kinesin light chain 2 OS=Homo sapiens GN=KLC2 PE=1 SV=1	13.3818	7.5144e-09	0.0086503	0.0083624	0.0081385	0.0078973	0.00826212	62	71	73	74	70	0.00065485	0.00054644	0.00052906	0.00073931	0.000617415	10	9	8	12	9.75
KLC1	Kinesin light chain 1 OS=Homo sapiens GN=KLC1 PE=1 SV=2	13.1801	4.61233e-07	0.0053008	0.0054976	0.0045987	0.0053289	0.0051815	48	56	52	62	54.5	0.00021326	0.00052727	0.00043073	0.00040126	0.00039313	6	11	8	10	8.75
ATP5C1	ATP synthase subunit gamma, mitochondrial OS=Homo sapiens GN=ATP5C1 PE=1 SV=1	8.6911	0.002081	0.0017473	0.00098335	0.00093079	0.0011138	0.00119381	6	4	4	5	4.75	0.00027337	0	0.00027607	0	0.00013736	2	0	2	0	1
KIF5B	Kinesin-1 heavy chain OS=Homo sapiens GN=KIF5B PE=1 SV=1	8.66862	3.49397e-09	0.012436	0.013085	0.013466	0.013166	0.0130383	138	172	187	191	172	0.0016073	0.0014902	0.0013669	0.0015519	0.00150408	38	38	32	39	36.75
ALB	Serum albumin OS=Homo sapiens GN=ALB PE=1 SV=2	8.24513	0.276801	0	0.00024059	0.00079706	0	0.000259412	0	2	7	0	2.25	0	0	0	0.00012585	3.14625e-05	0	0	0	2	0.5
FLG2	Filaggrin-2 OS=Homo sapiens GN=FLG2 PE=1 SV=1	7.57667	0.0786887	0.00018148	0.00012256	8.7007e-05	0	9.77617e-05	5	4	3	0	3	0	0	5.1612e-05	0	1.2903e-05	0	0	3	0	0.75
LPCAT1	Lysophosphatidylcholine acyltransferase 1 OS=Homo sapiens GN=LPCAT1 PE=1 SV=2	6.63907	0.00320512	0.00048754	0.00041157	0.00064929	0.00049723	0.000511408	3	3	5	4	3.75	0	0	0.00030812	0	7.703e-05	0	0	4	0	1
TTC1	Tetratricopeptide repeat protein 1 OS=Homo sapiens GN=TTC1 PE=1 SV=1	6.33386	0.259938	0	0.00050178	0	0.0011366	0.000409595	0	2	0	5	1.75	0	0.00025867	0	0	6.46675e-05	0	2	0	0	0.5
KRT85	Keratin, type II cuticular Hb5 OS=Homo sapiens GN=KRT85 PE=1 SV=1	5.99868	0.378042	0	0.0047684	0.00054709	0	0.00132887	0	33	4	0	9.25	0.00064271	0	0.0002434	0	0.000221528	8	0	3	0	2.75
GAPDH	Glyceraldehyde-3-phosphate dehydrogenase OS=Homo sapiens GN=GAPDH PE=1 SV=3	5.84935	2.03444e-05	0.0015543	0.0015308	0.001242	0.0011889	0.001379	6	7	6	6	6.25	0.00024318	0.00022547	0.00024558	0.00022878	0.000235752	2	2	2	2	2
HACD3	Very-long-chain (3R)-3-hydroxyacyl-CoA dehydratase 3 OS=Homo sapiens GN=HACD3 PE=1 SV=2	5.55879	0.0778475	0.00047946	0.00040475	0	0.00036674	0.000312738	2	2	0	2	1.5	0.00022504	0	0	0	5.626e-05	2	0	0	0	0.5
SCAMP1	Secretory carrier-associated membrane protein 1 OS=Homo sapiens GN=SCAMP1 PE=1 SV=2	5.27549	0.00426801	0.00077025	0.0017339	0.0020516	0.0015711	0.00153171	3	8	10	8	7.25	0.00024102	0.00022346	0.0002434	0.0004535	0.000290345	2	2	2	4	2.5
SLC25A10	Mitochondrial dicarboxylate carrier OS=Homo sapiens GN=SLC25A10 PE=1 SV=2	5.15259	0.267324	0	0.00051052	0.00096647	0	0.000369248	0	2	4	0	1.5	0	0	0.00028665	0	7.16625e-05	0	0	2	0	0.5
HLCS	Biotin--protein ligase OS=Homo sapiens GN=HLCS PE=1 SV=1	4.8808	0.000699165	0.00059767	0.00090817	0.00095515	0.00091433	0.00084383	5	9	10	10	8.5	0.00016831	0.00031211	0	0.00021113	0.000172887	3	6	0	4	3.25
ATP5F1	ATP synthase F(0) complex subunit B1, mitochondrial OS=Homo sapiens GN=ATP5F1 PE=1 SV=2	4.37294	0.141998	0.001017	0.00057234	0	0.00051859	0.000526983	3	2	0	2	1.75	0	0	0.00048204	0	0.00012051	0	0	3	0	0.75
SREK1IP1	Protein SREK1IP1 OS=Homo sapiens GN=SREK1IP1 PE=1 SV=1	4.26109	0.484378	0.0022395	0	0	0	0.000559875	4	0	0	0	1	0.00052557	0	0	0	0.000131393	2	0	0	0	0.5
KRT86	Keratin, type II cuticular Hb6 OS=Homo sapiens GN=KRT86 PE=1 SV=1	4.16611	0.431133	0	0.002864	0.00028537	0	0.000787342	0	32	6	0	9.5	0.00058667	0	0.00016928	0	0.000188988	13	0	5	0	4.5
HELZ	Probable helicase with zinc finger domain OS=Homo sapiens GN=HELZ PE=1 SV=2	4.15173	0.00819346	0.00013406	0.00011317	0.00010712	6.8363e-05	0.000105678	3	3	3	2	2.75	6.2923e-05	3.8893e-05	0	0	2.5454e-05	3	2	0	0	1.25
ATP1B3	Sodium/potassium-transporting ATPase subunit beta-3 OS=Homo sapiens GN=ATP1B3 PE=1 SV=1	4.07411	0.491307	0	0	0	0.0011896	0.0002974	0	0	0	5	1.25	0.00029199	0	0	0	7.29975e-05	2	0	0	0	0.5
ALG1	Chitobiosyldiphosphodolichol beta-mannosyltransferase OS=Homo sapiens GN=ALG1 PE=1 SV=2	3.94112	0.00700144	0.0016833	0.00078943	0.00089669	0.0010014	0.00109271	9	5	6	7	6.75	0.00035114	0.00024417	0.00026596	0.00024776	0.000277257	4	3	3	3	3.25
LTN1	E3 ubiquitin-protein ligase listerin OS=Homo sapiens GN=LTN1 PE=1 SV=6	3.93871	0.13271	9.8281e-05	0.00016593	0	7.5176e-05	8.48467e-05	2	4	0	2	2	0	4.2769e-05	0	4.3398e-05	2.15418e-05	0	2	0	2	1
FAM135A	Protein FAM135A OS=Homo sapiens GN=FAM135A PE=1 SV=2	3.93139	0.00321235	0.00057282	0.0007737	0.00086966	0.0010954	0.000827895	10	16	19	25	17.5	0.00013443	0.0002742	5.4303e-05	0.00037941	0.000210586	5	11	2	15	8.25
PCCA	Propionyl-CoA carboxylase alpha chain, mitochondrial OS=Homo sapiens GN=PCCA PE=1 SV=4	3.76293	1.16075e-07	0.028609	0.02878	0.031529	0.028722	0.02941	240	286	331	315	293	0.0081128	0.0074182	0.0083625	0.0073694	0.00781572	145	143	148	140	144
LGALS3BP	Galectin-3-binding protein OS=Homo sapiens GN=LGALS3BP PE=1 SV=1	3.65123	0.0021933	0.0011868	0.0010018	0.0009483	0.00056735	0.000926062	8	8	8	5	7.25	0.00027851	0.00025823	0.00028126	0.00019652	0.00025363	4	4	4	3	3.75
NME2	Nucleoside diphosphate kinase B OS=Homo sapiens GN=NME2 PE=1 SV=1	3.64396	0.300529	0	0.00096394	0	0.00087342	0.00045934	0	2	0	2	1	0	0	0	0.00050422	0.000126055	0	0	0	2	0.5
BTF3	Transcription factor BTF3 OS=Homo sapiens GN=BTF3 PE=1 SV=1	3.53221	0.121938	0	0.0010669	0.0016831	0.0012889	0.00100972	0	3	5	4	3	0	0	0.00039936	0.00074409	0.000285863	0	0	2	4	1.5
ZCCHC17	Nucleolar protein of 40 kDa OS=Homo sapiens GN=ZCCHC17 PE=1 SV=1	3.50107	0.310146	0	0.00060796	0.00057547	0	0.000295858	0	2	2	0	1	0.00033802	0	0	0	8.4505e-05	2	0	0	0	0.5
SLC39A14	Zinc transporter ZIP14 OS=Homo sapiens GN=SLC39A14 PE=1 SV=3	3.46241	0.0188337	0.00035277	0.0005956	0.0009866	0.00080951	0.00068612	2	4	7	6	4.75	0	0.00023028	0.00025082	0.00031155	0.000198162	0	3	3	4	2.5
DNAJB6	DnaJ homolog subfamily B member 6 OS=Homo sapiens GN=DNAJB6 PE=1 SV=2	3.40878	0.000144153	0.001331	0.0017978	0.001489	0.001629	0.0015617	5	8	7	8	7	0.00049978	0.00023169	0.0006309	0.00047019	0.00045814	4	2	5	4	3.75
TOP1	DNA topoisomerase 1 OS=Homo sapiens GN=TOP1 PE=1 SV=2	3.39623	3.4533e-05	0.00079408	0.00095764	0.00090646	0.0010413	0.00092487	7	10	10	12	9.75	0.00031947	0.00024683	0.00032262	0.00020037	0.000272323	6	5	6	4	5.25
PFDN6	Prefoldin subunit 6 OS=Homo sapiens GN=PFDN6 PE=1 SV=1	3.37436	0.00883345	0.0020182	0.0022716	0.0016127	0.0020583	0.0019902	3	4	3	4	3.5	0	0.001171	0	0.0011882	0.0005898	0	4	0	4	2
ATP1A1	Sodium/potassium-transporting ATPase subunit alpha-1 OS=Homo sapiens GN=ATP1A1 PE=1 SV=1	3.36056	3.0926e-06	0.0014421	0.0014322	0.0012879	0.0012978	0.001365	17	20	19	20	19	0.00047779	0.00029533	0.0004021	0.00044951	0.000406183	12	8	10	12	10.5
UQCRC2	Cytochrome b-c1 complex subunit 2, mitochondrial OS=Homo sapiens GN=UQCRC2 PE=1 SV=3	3.35719	0.00207308	0.00076628	0.001132	0.0013777	0.0011723	0.00111207	4	7	9	8	7	0.00035966	0.00016673	0.00054483	0.00025378	0.00033125	4	2	6	3	3.75
CKB	Creatine kinase B-type OS=Homo sapiens GN=CKB PE=1 SV=1	3.28961	0.328769	0.00045555	0	0	0.00052268	0.000244558	2	0	0	3	1.25	0	0.00029737	0	0	7.43425e-05	0	3	0	0	0.75
KRT17	Keratin, type I cytoskeletal 17 OS=Homo sapiens GN=KRT17 PE=1 SV=2	3.28594	0.240703	0.0030133	0	0.0011236	0.00076829	0.0012263	31	0	25	24	20	0.00047143	0	0.00066653	0.00035482	0.000373195	21	0	24	13	14.5
SLC7A5	Large neutral amino acids transporter small subunit 1 OS=Homo sapiens GN=SLC7A5 PE=1 SV=2	3.21761	0.0189994	0.00068467	0.00057798	0.00068387	0.00039278	0.000584825	4	4	5	3	4	0.00032136	0	0.00040567	0	0.000181758	4	0	5	0	2.25
KRT33B	Keratin, type I cuticular Ha3-II OS=Homo sapiens GN=KRT33B PE=1 SV=3	3.21192	0.485835	0	0.0045334	0.00034329	0	0.00121917	0	25	2	0	6.75	0.0009074	0	0.00061091	0	0.000379578	9	0	6	0	3.75
PCCB	Propionyl-CoA carboxylase beta chain, mitochondrial OS=Homo sapiens GN=PCCB PE=1 SV=3	3.15668	1.20704e-06	0.024795	0.029086	0.027275	0.028079	0.0273087	154	214	212	228	202	0.0091439	0.0081977	0.0091579	0.0081049	0.0086511	121	117	120	114	118
HBB	Hemoglobin subunit beta OS=Homo sapiens GN=HBB PE=1 SV=2	3.10575	0.405594	0	0	0.005189	0.0013547	0.00163592	0	0	11	3	3.5	0.00055418	0.00077072	0	0.00078206	0.00052674	2	3	0	3	2
RAB11FIP1	Rab11 family-interacting protein 1 OS=Homo sapiens GN=RAB11FIP1 PE=1 SV=3	3.05344	0.0104286	0.0003382	0.0009136	0.00064858	0.00072433	0.000656177	5	16	12	14	11.75	0.00022223	0.00020605	0.00019237	0.00023894	0.000214897	7	7	6	8	7
PFDN5	Prefoldin subunit 5 OS=Homo sapiens GN=PFDN5 PE=1 SV=2	3.03751	1.30929e-05	0.0050717	0.0047571	0.0045029	0.0043104	0.00466052	9	10	10	10	9.75	0.001058	0.0017166	0.0018697	0.001493	0.00153433	4	7	7	6	6
VBP1	Prefoldin subunit 3 OS=Homo sapiens GN=VBP1 PE=1 SV=3	2.99553	0.00019573	0.0026431	0.0037187	0.00352	0.0033695	0.00331283	6	10	10	10	9	0.0010338	0.0011502	0.0014616	0.00077809	0.00110592	5	6	7	4	5.5
TPD52L2	Tumor protein D54 OS=Homo sapiens GN=TPD52L2 PE=1 SV=2	2.94871	9.20847e-06	0.0080041	0.0081794	0.0074057	0.0067669	0.00758903	19	23	22	21	21.25	0.002175	0.0029332	0.0023962	0.0027903	0.00257368	11	16	12	15	13.5
NDUFA9	NADH dehydrogenase [ubiquinone] 1 alpha subcomplex subunit 9, mitochondrial OS=Homo sapiens GN=NDUFA9 PE=1 SV=2	2.88544	0.342813	0.00046038	0	0	0.0007043	0.00029117	2	0	0	4	1.5	0	0.00020035	0	0.00020329	0.00010091	0	2	0	2	1
KRT19	Keratin, type I cytoskeletal 19 OS=Homo sapiens GN=KRT19 PE=1 SV=4	2.8837	0.00511608	0.0013017	0.0010989	0.0015602	0.00082975	0.00119764	18	19	23	16	19	0.00040732	0.00037765	0.00020567	0.00067061	0.000415312	15	11	14	12	13
KRT16	Keratin, type I cytoskeletal 16 OS=Homo sapiens GN=KRT16 PE=1 SV=4	2.8089	0.0195948	0.0060545	0.0023232	0.0035185	0.0036488	0.00388625	54	37	43	49	45.75	0.0015501	0.0011976	0.0016523	0.0011342	0.00138355	37	32	39	31	34.75
ACADM	Medium-chain specific acyl-CoA dehydrogenase, mitochondrial OS=Homo sapiens GN=ACADM PE=1 SV=1	2.80774	8.77398e-06	0.0012368	0.0012181	0.0013177	0.0012614	0.0012585	6	7	8	8	7.25	0.00048375	0.00035882	0.00058624	0.00036409	0.000448225	5	4	6	4	4.75
HSD17B10	3-hydroxyacyl-CoA dehydrogenase type-2 OS=Homo sapiens GN=HSD17B10 PE=1 SV=3	2.78542	0.0119219	0.00133	0.0025262	0.0015941	0.0017803	0.00180765	4	9	6	7	6.5	0.0012485	0.00043409	0.00047281	0.00044047	0.000648968	8	3	3	3	4.25
HSD17B12	Very-long-chain 3-oxoacyl-CoA reductase OS=Homo sapiens GN=HSD17B12 PE=1 SV=2	2.77691	0.000870986	0.0033378	0.0042265	0.0026671	0.0038296	0.00351525	12	18	12	18	15	0.0015666	0.00096834	0.0010547	0.0014739	0.00126589	12	8	8	12	10
LDHB	L-lactate dehydrogenase B chain OS=Homo sapiens GN=LDHB PE=1 SV=2	2.72295	0.0299124	0.00077948	0.001316	0.0010381	0.00039749	0.000882767	3	6	5	2	4	0.0002439	0.00033921	0.00036947	0.0003442	0.000324195	2	3	3	3	2.75
DCD	Dermcidin OS=Homo sapiens GN=DCD PE=1 SV=2	2.72266	0.0355897	0.0055225	0.00333	0.003152	0.0018104	0.00345372	7	5	5	3	5	0.0018515	0.00103	0.0014958	0.00069674	0.00126851	5	3	4	2	3.5
SPNS1	Protein spinster homolog 1 OS=Homo sapiens GN=SPNS1 PE=1 SV=1	2.703	0.349044	0.00049308	0	0.00052533	0	0.000254602	3	0	4	0	1.75	0	0.00014305	0.00023372	0	9.41925e-05	0	2	3	0	1.25
KRT13	Keratin, type I cytoskeletal 13 OS=Homo sapiens GN=KRT13 PE=1 SV=4	2.68497	0.131675	0.00075792	0.00063982	0.00045422	0	0.00046299	11	16	9	0	9	0.00017787	0.00016491	0.00017963	0.00016734	0.000172438	9	7	9	9	8.5
SLC3A2	4F2 cell-surface antigen heavy chain OS=Homo sapiens GN=SLC3A2 PE=1 SV=3	2.67134	0.57927	0	0.00034885	0	0	8.72125e-05	0	3	0	0	0.75	0	0	0.00013059	0	3.26475e-05	0	0	2	0	0.5
HIST1H4A	Histone H4 OS=Homo sapiens GN=HIST1H4A PE=1 SV=2	2.66488	0.290456	0.0084254	0.0021338	0.0033662	0	0.00348135	10	3	5	0	4.5	0	0.0025666	0.00079873	0.0018602	0.00130638	0	7	2	5	3.5
ACACA	Acetyl-CoA carboxylase 1 OS=Homo sapiens GN=ACACA PE=1 SV=2	2.6524	2.04232e-06	0.048977	0.045217	0.045195	0.05161	0.0477497	1324	1448	1529	1824	1531.25	0.01639	0.018609	0.017867	0.019144	0.0180025	944	1156	1019	1172	1072.75
SNAP47	Synaptosomal-associated protein 47 OS=Homo sapiens GN=SNAP47 PE=1 SV=3	2.63656	0.582785	0	0	0	0.00042918	0.000107295	0	0	0	3	0.75	0	0.00016278	0	0	4.0695e-05	0	2	0	0	0.5
PFKL	ATP-dependent 6-phosphofructokinase, liver type OS=Homo sapiens GN=PFKL PE=1 SV=6	2.62739	0.00073106	0.0014464	0.0021602	0.0016892	0.0017021	0.00174947	13	23	19	20	18.75	0.00062665	0.00067784	0.00047463	0.00088432	0.00066586	12	14	9	18	13.25
PFKM	ATP-dependent 6-phosphofructokinase, muscle type OS=Homo sapiens GN=PFKM PE=1 SV=2	2.59836	0.586765	0	0	0	0.00025531	6.38275e-05	0	0	0	3	0.75	0	0	0	9.8258e-05	2.45645e-05	0	0	0	5	1.25
RP9	Retinitis pigmentosa 9 protein OS=Homo sapiens GN=RP9 PE=1 SV=2	2.50301	0.0182673	0.001178	0.0016575	0.00094132	0.0015018	0.00131966	3	5	3	5	4	0	0.00068354	0.00055839	0.00086698	0.000527228	0	4	3	5	3
SUB1	Activated RNA polymerase II transcriptional coactivator p15 OS=Homo sapiens GN=SUB1 PE=1 SV=3	2.45721	0.00782053	0.0054666	0.010383	0.0076442	0.0094082	0.0082255	8	18	14	18	14.5	0.0051316	0.0029737	0.0022673	0.0030174	0.0033475	16	10	7	10	10.75
KRT5	Keratin, type II cytoskeletal 5 OS=Homo sapiens GN=KRT5 PE=1 SV=3	2.45362	0.0375024	0.0069131	0.0037251	0.003761	0.0025877	0.00424672	61	45	49	29	46	0.0020021	0.0016002	0.0020219	0.001299	0.0017308	50	39	47	35	42.75
RCN2	Reticulocalbin-2 OS=Homo sapiens GN=RCN2 PE=1 SV=1	2.42062	0.607073	0	0	0	0.0006282	0.00015705	0	0	0	3	0.75	0	0	0.00025952	0	6.488e-05	0	0	2	0	0.5
ACACB	Acetyl-CoA carboxylase 2 OS=Homo sapiens GN=ACACB PE=1 SV=3	2.41229	1.43945e-06	0.0032834	0.0029506	0.0031597	0.0033217	0.00317885	214	219	225	277	233.75	0.0011931	0.001306	0.0013221	0.0014499	0.00131778	154	172	159	175	165
LUC7L2	Putative RNA-binding protein Luc7-like 2 OS=Homo sapiens GN=LUC7L2 PE=1 SV=2	2.40132	0.000363994	0.010848	0.0097181	0.0076066	0.010838	0.00975268	49	52	43	64	52	0.0037407	0.0043353	0.0036727	0.0044968	0.00406137	36	45	35	46	40.5
DOPEY2	Protein dopey-2 OS=Homo sapiens GN=DOPEY2 PE=1 SV=5	2.38666	0.179102	0	9.5639e-05	6.0352e-05	8.6658e-05	6.06623e-05	0	3	2	3	2	3.545e-05	3.2868e-05	0	3.3351e-05	2.54172e-05	2	2	0	2	1.5
KRT9	Keratin, type I cytoskeletal 9 OS=Homo sapiens GN=KRT9 PE=1 SV=3	2.38448	0.00378215	0.024516	0.020226	0.014359	0.015982	0.0187707	176	172	129	150	156.75	0.0096109	0.0066074	0.0083193	0.0069506	0.00787205	147	109	126	113	123.75
AIF1L	Allograft inflammatory factor 1-like OS=Homo sapiens GN=AIF1L PE=1 SV=1	2.3683	0.232899	0	0.0014652	0.0013869	0.00088507	0.000934292	0	3	3	2	2	0	0.00075531	0.00082269	0	0.0003945	0	3	3	0	1.5
CDK1	Cyclin-dependent kinase 1 OS=Homo sapiens GN=CDK1 PE=1 SV=3	2.36543	0.411543	0	0	0.00070045	0.0011175	0.000454488	0	0	3	6	2.25	0	0.00038147	0	0.00038708	0.000192138	0	4	0	4	2
PPIL4	Peptidyl-prolyl cis-trans isomerase-like 4 OS=Homo sapiens GN=PPIL4 PE=1 SV=1	2.31402	0.0341539	0.0017639	0.0020846	0.00084566	0.0010794	0.00144339	10	14	6	8	9.5	0.00066231	0.00069083	0.00075246	0.00038944	0.00062376	8	9	9	5	7.75
SLC1A5	Neutral amino acid transporter B(0) OS=Homo sapiens GN=SLC1A5 PE=1 SV=2	2.28829	0.000463997	0.0030478	0.0024375	0.0024354	0.0020859	0.00250165	19	18	19	17	18.25	0.0010541	0.0011867	0.0011405	0.00099166	0.00109324	14	17	15	14	15
HRNR	Hornerin OS=Homo sapiens GN=HRNR PE=1 SV=2	2.28644	0.00166695	0.00076124	0.00064263	0.00048663	0.00055899	0.000612373	25	25	20	24	23.5	0.00030013	0.00023852	0.00031753	0.00021513	0.000267828	21	18	22	16	19.25
KRT6A	Keratin, type II cytoskeletal 6A OS=Homo sapiens GN=KRT6A PE=1 SV=3	2.27768	0.0390806	0.0033851	0.0019484	0.0015984	0.00153	0.00211547	50	39	42	29	40	0.0013	0.00087048	0.00072933	0.00081533	0.000928785	51	35	39	32	39.25
KRT78	Keratin, type II cytoskeletal 78 OS=Homo sapiens GN=KRT78 PE=1 SV=2	2.27134	0.0211789	0.0011682	0.00070442	0.00080013	0.00063827	0.000827755	8	7	7	5	6.75	0.00031332	0.0002905	0.00063284	0.00022108	0.000364435	6	5	9	4	6
RBSN	Rabenosyn-5 OS=Homo sapiens GN=RBSN PE=1 SV=2	2.26433	0.000131076	0.0024352	0.0024295	0.0030957	0.0029634	0.00273095	22	26	35	35	29.5	0.0011949	0.0012043	0.0011543	0.0012708	0.00120608	23	25	22	26	24
PC	Pyruvate carboxylase, mitochondrial OS=Homo sapiens GN=PC PE=1 SV=2	2.26059	1.82544e-07	0.028731	0.029975	0.031081	0.030203	0.0299975	390	482	528	536	484	0.012794	0.012503	0.014282	0.0135	0.0132698	370	390	409	415	396
MCCC2	Methylcrotonoyl-CoA carboxylase beta chain, mitochondrial OS=Homo sapiens GN=MCCC2 PE=1 SV=1	2.26034	4.07314e-05	0.030828	0.027846	0.026974	0.029358	0.0287515	200	214	219	249	220.5	0.014325	0.010934	0.015343	0.010278	0.01272	198	163	210	151	180.5
SLC25A5	ADP/ATP translocase 2 OS=Homo sapiens GN=SLC25A5 PE=1 SV=7	2.24318	0.00162965	0.0034946	0.0049167	0.0053521	0.005346	0.00477735	12	20	23	24	19.75	0.0023236	0.0019009	0.0026227	0.0016717	0.00212972	17	15	19	13	16
AKAP8L	A-kinase anchor protein 8-like OS=Homo sapiens GN=AKAP8L PE=1 SV=3	2.23851	0.200447	0	0.00056702	0.0010734	0.0009248	0.000641305	0	5	10	9	6	0.00012611	0.00040922	0.0002547	0.00035592	0.000286487	2	7	4	6	4.75
DVL1	Segment polarity protein dishevelled homolog DVL-1 OS=Homo sapiens GN=DVL1 PE=1 SV=2	2.22279	1.00444e-05	0.0054941	0.0059029	0.0054877	0.0063992	0.00582098	49	66	66	76	64.25	0.0025787	0.0027169	0.0023675	0.002812	0.00261877	50	55	46	56	51.75
KRT14	Keratin, type I cytoskeletal 14 OS=Homo sapiens GN=KRT14 PE=1 SV=4	2.20894	0.00693662	0.011032	0.0069845	0.007052	0.0068911	0.0079899	60	45	48	49	50.5	0.0043148	0.0029604	0.0042703	0.0029228	0.00361707	50	37	49	36	43
RBM39	RNA-binding protein 39 OS=Homo sapiens GN=RBM39 PE=1 SV=2	2.18887	0.00175709	0.003766	0.0038703	0.0037943	0.0055108	0.00423535	23	28	29	44	31	0.0019213	0.0017814	0.0019403	0.0020968	0.00193495	25	25	25	29	26
GCN1	eIF-2-alpha kinase activator GCN1 OS=Homo sapiens GN=GCN1 PE=1 SV=6	2.18713	0.00013943	0.00094222	0.001152	0.0008827	0.0010189	0.000998955	29	42	34	41	36.5	0.00048799	0.00049487	0.00038501	0.0004591	0.000456742	32	35	25	32	31
LUC7L	Putative RNA-binding protein Luc7-like 1 OS=Homo sapiens GN=LUC7L PE=1 SV=1	2.18254	0.00515158	0.0011696	0.00098732	0.0013084	0.00071569	0.00104525	14	17	18	18	16.75	0.00043916	0.00050897	0.00055437	0.00041316	0.000478915	17	18	14	13	15.5
DVL2	Segment polarity protein dishevelled homolog DVL-2 OS=Homo sapiens GN=DVL2 PE=1 SV=1	2.17282	2.80142e-06	0.010376	0.011745	0.010929	0.011905	0.0112388	88	118	116	132	113.5	0.0052575	0.0050799	0.0051977	0.0051546	0.00517242	95	99	93	99	96.5
PFKP	ATP-dependent 6-phosphofructokinase, platelet type OS=Homo sapiens GN=PFKP PE=1 SV=2	2.16257	2.68798e-06	0.00088553	0.00093443	0.00097294	0.001016	0.000952225	8	11	12	13	11	0.00041563	0.00043353	0.00047221	0.00043991	0.00044032	10	10	11	13	11
CDIPT	CDP-diacylglycerol--inositol 3-phosphatidyltransferase OS=Homo sapiens GN=CDIPT PE=1 SV=1	2.1601	0.0539094	0.00081485	0.0010318	0.0019534	0.0018699	0.00141749	2	3	6	6	4.25	0.00076492	0.0003546	0.0009656	0.00053973	0.000656213	4	2	5	3	3.5
KRT1	Keratin, type II cytoskeletal 1 OS=Homo sapiens GN=KRT1 PE=1 SV=6	2.14991	0.000980965	0.024256	0.019907	0.017659	0.017317	0.0197848	189	186	174	178	181.75	0.010436	0.0079167	0.010603	0.0078546	0.00920258	178	144	181	142	161.25
NKAP	NF-kappa-B-activating protein OS=Homo sapiens GN=NKAP PE=1 SV=1	2.14753	0.0206634	0.0012547	0.0014122	0.0010026	0.00063981	0.00107733	6	8	6	4	6	0.0005889	0.00054601	0.00059471	0.00027702	0.00050166	6	6	6	3	5.25
ARGLU1	Arginine and glutamate-rich protein 1 OS=Homo sapiens GN=ARGLU1 PE=1 SV=1	2.14455	0.0201865	0.00063576	0.00080505	0.001016	0.0012158	0.000918152	2	3	4	5	3.5	0.0002984	0.00069167	0.00030135	0.00042111	0.000428132	2	5	2	3	3
VPS45	Vacuolar protein sorting-associated protein 45 OS=Homo sapiens GN=VPS45 PE=1 SV=1	2.14333	1.73827e-07	0.0041107	0.0041128	0.0040147	0.004076	0.00407855	27	32	33	35	31.75	0.001715	0.0019214	0.0020928	0.0018824	0.0019029	24	29	29	28	27.5
SEC22B	Vesicle-trafficking protein SEC22b OS=Homo sapiens GN=SEC22B PE=1 SV=4	2.13056	0.647983	0.00080727	0	0	0	0.000201818	2	0	0	0	0.5	0.0003789	0	0	0	9.4725e-05	2	0	0	0	0.5
MON2	Protein MON2 homolog OS=Homo sapiens GN=MON2 PE=1 SV=3	2.11897	0.000899067	0.0003538	0.00046934	0.00036348	0.00046393	0.000412637	7	11	9	12	9.75	0.00018978	0.00017596	0.0001677	0.0002455	0.000194735	8	8	7	11	8.5
TPD52	Tumor protein D52 OS=Homo sapiens GN=TPD52 PE=1 SV=2	2.08148	0.000355882	0.0038742	0.0035976	0.0030957	0.0029634	0.00338273	10	11	10	10	10.25	0.0018184	0.001686	0.0012855	0.0017107	0.00162515	10	10	7	10	9.25
MCCC1	Methylcrotonoyl-CoA carboxylase subunit alpha, mitochondrial OS=Homo sapiens GN=MCCC1 PE=1 SV=3	2.05735	8.26555e-06	0.050034	0.051736	0.052032	0.058323	0.0530313	418	512	544	637	527.75	0.025563	0.024847	0.027801	0.024895	0.0257765	455	477	490	471	473.25
U2AF1	Splicing factor U2AF 35 kDa subunit OS=Homo sapiens GN=U2AF1 PE=1 SV=3	2.04223	0.00793662	0.0036159	0.0033577	0.0028893	0.0019361	0.00294975	10	11	10	7	9.5	0.0015274	0.0012588	0.0017139	0.0012774	0.00144437	9	8	10	8	8.75
RPS27A	Ubiquitin-40S ribosomal protein S27a OS=Homo sapiens GN=RPS27A PE=1 SV=2	2.03813	0.0327159	0.0050066	0.0075138	0.0031116	0.0051062	0.00518455	9	16	7	12	11	0.0033943	0.0021788	0.0026368	0.0019652	0.00254377	13	9	10	8	10
RAF1	RAF proto-oncogene serine/threonine-protein kinase OS=Homo sapiens GN=RAF1 PE=1 SV=1	2.03024	0.0267817	0.00066961	0.00045222	0.00064208	0.00092195	0.000671465	5	4	6	9	6	0.00025143	0.00040796	0.00019044	0.0004731	0.000330732	4	7	3	8	5.5
CLINT1	Clathrin interactor 1 OS=Homo sapiens GN=CLINT1 PE=1 SV=1	2.00151	0.00808659	0.0015274	0.0015238	0.00088761	0.0013807	0.00132988	11	13	8	13	11.25	0.00058654	0.0007251	0.0008556	0.00049051	0.000664437	9	12	13	8	10.5
NDUFA4	Cytochrome c oxidase subunit NDUFA4 OS=Homo sapiens GN=NDUFA4 PE=1 SV=1	1.98898	0.475112	0.0021428	0	0.0017122	0	0.00096375	2	0	2	0	1	0.0010057	0.00093248	0	0	0.000484545	2	2	0	0	1
KRT10	Keratin, type I cytoskeletal 10 OS=Homo sapiens GN=KRT10 PE=1 SV=6	1.98555	0.0134144	0.023924	0.01844	0.014486	0.013412	0.0175655	169	158	134	126	146.75	0.010253	0.007566	0.010284	0.0072836	0.00884665	157	126	156	120	139.75
MRPS28	28S ribosomal protein S28, mitochondrial OS=Homo sapiens GN=MRPS28 PE=1 SV=1	1.97942	0.282249	0	0.00078352	0.0014833	0.0014199	0.00092168	0	2	4	4	2.5	0	0.00080782	0.00043994	0.00061477	0.000465633	0	4	2	3	2.25
LUC7L3	Luc7-like protein 3 OS=Homo sapiens GN=LUC7L3 PE=1 SV=2	1.95359	0.000558292	0.0020088	0.0015262	0.0019262	0.0016902	0.00178785	10	9	12	11	10.5	0.0010372	0.00096162	0.00095219	0.00070964	0.000915163	11	11	10	8	10
KRT2	Keratin, type II cytoskeletal 2 epidermal OS=Homo sapiens GN=KRT2 PE=1 SV=2	1.93324	0.0157753	0.015211	0.014446	0.010092	0.0085183	0.0120668	112	126	93	82	103.25	0.0070118	0.0048463	0.0075317	0.0055772	0.00624175	110	82	117	93	100.5
ATP2A2	Sarcoplasmic/endoplasmic reticulum calcium ATPase 2 OS=Homo sapiens GN=ATP2A2 PE=1 SV=1	1.90458	0.000455172	0.0018322	0.0022498	0.0024623	0.0020385	0.0021457	22	32	37	32	30.75	0.00129	0.0011235	0.0010264	0.0010665	0.0011266	33	31	26	29	29.75
SEC61A1	Protein transport protein Sec61 subunit alpha isoform 1 OS=Homo sapiens GN=SEC61A1 PE=1 SV=2	1.87444	0.508838	0.00036463	0	0	0.00041836	0.000195748	2	0	0	3	1.25	0.00025671	0	0	0.00016101	0.00010443	3	0	0	2	1.25
PAICS	Multifunctional protein ADE2 OS=Homo sapiens GN=PAICS PE=1 SV=3	1.82607	0.00135853	0.0036755	0.0046541	0.0040791	0.0034361	0.0039612	18	27	25	22	23	0.0019168	0.0025769	0.001839	0.0023443	0.00216925	20	29	19	26	23.5
GART	Trifunctional purine biosynthetic protein adenosine-3 OS=Homo sapiens GN=GART PE=1 SV=1	1.82491	0.0481952	0.00060146	0.00087041	0.00075523	0.0013145	0.0008854	7	12	11	20	12.5	0.00044362	0.00052348	0.00036654	0.00060706	0.000485175	11	14	9	16	12.5
SURF4	Surfeit locus protein 4 OS=Homo sapiens GN=SURF4 PE=1 SV=3	1.81442	0.175412	0.00064522	0.0010894	0.00051557	0.00098706	0.000809313	2	4	2	4	3	0.00090852	0	0.00030583	0.00056983	0.000446045	6	0	2	4	3
AHNAK2	Protein AHNAK2 OS=Homo sapiens GN=AHNAK2 PE=1 SV=2	1.79564	0.31547	0	3.7925e-05	2.3932e-05	3.4364e-05	2.40552e-05	0	3	2	3	2	0	1.9551e-05	1.4197e-05	1.9838e-05	1.33965e-05	0	3	2	3	2
HSP90AB1	Heat shock protein HSP 90-beta OS=Homo sapiens GN=HSP90AB1 PE=1 SV=4	1.7662	0.00422218	0.0016781	0.0024285	0.0022029	0.0022004	0.00212748	14	24	23	24	21.25	0.00095641	0.0015649	0.0010795	0.0012174	0.00120455	17	30	19	23	22.25
NOLC1	Nucleolar and coiled-body phosphoprotein 1 OS=Homo sapiens GN=NOLC1 PE=1 SV=2	1.76235	0.000964351	0.00049661	0.00062884	0.00069443	0.00066475	0.000621157	4	6	7	7	6	0.00034963	0.00037819	0.00035309	0.00032893	0.00035246	6	7	6	6	6.25
CLTC	Clathrin heavy chain 1 OS=Homo sapiens GN=CLTC PE=1 SV=5	1.74456	0.0338341	0.00015543	0.00013121	0.000207	0.00011889	0.000153133	3	3	5	3	3.5	4.8635e-05	0.00011273	9.8232e-05	9.1512e-05	8.77773e-05	2	5	4	4	3.75
ECH1	Delta(3,5)-Delta(2,4)-dienoyl-CoA isomerase, mitochondrial OS=Homo sapiens GN=ECH1 PE=1 SV=2	1.72668	0.00323289	0.0023812	0.0020102	0.0029598	0.0022262	0.00239435	9	9	14	11	10.75	0.0014902	0.0012665	0.0015049	0.0012851	0.00138667	12	11	12	11	11.5
MMTAG2	Multiple myeloma tumor-associated protein 2 OS=Homo sapiens GN=MMTAG2 PE=1 SV=1	1.72497	0.0272865	0.00098991	0.0011142	0.000791	0.001262	0.00103928	3	4	3	5	3.75	0.00092925	0.00057438	0.00046921	0.00043712	0.00060249	6	4	3	3	4
ARL6IP4	ADP-ribosylation factor-like protein 6-interacting protein 4 OS=Homo sapiens GN=ARL6IP4 PE=1 SV=2	1.69133	0.00420355	0.00041226	0.00052204	0.00049414	0.00047302	0.000475365	2	3	3	3	2.75	0.00029025	0.00035882	0.00029312	0.00018205	0.00028106	3	4	3	2	3
KIF1B	Kinesin-like protein KIF1B OS=Homo sapiens GN=KIF1B PE=1 SV=5	1.68738	0.384955	0	0.00020171	0.00022911	0.00010966	0.00013512	0	5	6	3	3.5	8.9718e-05	0.00010398	0	0.00012661	8.0077e-05	4	5	0	6	3.75
HIST1H2BM	Histone H2B type 1-M OS=Homo sapiens GN=HIST1H2BM PE=1 SV=3	1.68028	0.24916	0.0082649	0.0023257	0.0055035	0.0026341	0.00468205	12	4	10	5	7.75	0.0022629	0.003297	0.0016323	0.0039537	0.00278648	7	11	5	13	9
JPT1	Jupiter microtubule associated homolog 1 OS=Homo sapiens GN=JPT1 PE=1 SV=3	1.66429	0.0426341	0.0016906	0.0028543	0.0018011	0.0030173	0.00234082	3	6	4	7	5	0.0013225	0.0012261	0.0013355	0.0017419	0.0014065	5	5	5	7	5.5
SLC25A3	Phosphate carrier protein, mitochondrial OS=Homo sapiens GN=SLC25A3 PE=1 SV=2	1.64871	0.0329374	0.0011986	0.0012142	0.0011494	0.0016503	0.00130313	5	6	6	9	6.5	0.0011252	0.00093892	0.00056816	0.00052929	0.000790392	10	9	5	5	7.25
SUGT1	Protein SGT1 homolog OS=Homo sapiens GN=SUGT1 PE=1 SV=3	1.64206	0.0262683	0.0014265	0.0020071	0.0013299	0.0010912	0.00146368	6	10	7	6	7.25	0.00089276	0.0009312	0.00090158	0.00083991	0.000891362	8	9	8	8	8.25
CKAP5	Cytoskeleton-associated protein 5 OS=Homo sapiens GN=CKAP5 PE=1 SV=3	1.63577	0.0918588	0.00017083	7.2106e-05	0.00017063	0.00016334	0.000144226	4	2	5	5	4	0.00012027	5.5756e-05	0.00010122	7.5435e-05	8.81702e-05	6	3	5	4	4.5
TELO2	Telomere length regulation protein TEL2 homolog OS=Homo sapiens GN=TELO2 PE=1 SV=2	1.63426	0.113035	0.00020736	0.00043763	0.00033139	0.00055515	0.000382883	2	5	4	7	4.5	0.00014599	0.00027072	0.00024573	0.0002747	0.000234285	3	6	5	6	5
ATP5A1	ATP synthase subunit alpha, mitochondrial OS=Homo sapiens GN=ATP5A1 PE=1 SV=1	1.62956	0.0039122	0.0028247	0.0023846	0.0021317	0.0025208	0.00246545	18	18	17	21	18.5	0.0011785	0.0013658	0.0016365	0.001871	0.00151295	16	20	22	27	21.25
SNRNP27	U4/U6.U5 small nuclear ribonucleoprotein 27 kDa protein OS=Homo sapiens GN=SNRNP27 PE=1 SV=1	1.61692	0.371269	0	0.0018906	0.0022369	0.0021413	0.0015672	0	4	5	5	3.5	0.0013139	0	0.0013269	0.0012362	0.00096925	5	0	5	5	3.75
UBE2M	NEDD8-conjugating enzyme Ubc12 OS=Homo sapiens GN=UBE2M PE=1 SV=1	1.60323	0.0846867	0.0018969	0.0024019	0.0015157	0.0010882	0.00172568	4	6	4	3	4.25	0.00089032	0.00082547	0.0011239	0.0014658	0.00107637	4	4	5	7	5
EEF1A1	Elongation factor 1-alpha 1 OS=Homo sapiens GN=EEF1A1 PE=1 SV=1	1.57785	0.00964857	0.0045081	0.0038057	0.0036023	0.0028736	0.00369742	24	24	24	20	23	0.0019396	0.0024523	0.002493	0.0024884	0.00234333	22	30	28	30	27.5
RPL38	60S ribosomal protein L38 OS=Homo sapiens GN=RPL38 PE=1 SV=2	1.57143	0.0334219	0.0099179	0.0073259	0.0099063	0.0056897	0.00820995	8	7	10	6	7.75	0.0058189	0.004316	0.0052887	0.0054744	0.0052245	10	8	9	10	9.25
MAGED1	Melanoma-associated antigen D1 OS=Homo sapiens GN=MAGED1 PE=1 SV=3	1.55951	0.0559997	0.00022309	0.00028249	0.00026739	0.00034129	0.000278565	2	3	3	4	3	0.00026177	9.7083e-05	0.00015862	0.00019702	0.000178623	5	2	3	4	3.5
FHL1	Four and a half LIM domains protein 1 OS=Homo sapiens GN=FHL1 PE=1 SV=4	1.55927	0.0509952	0.00080602	0.0015877	0.0012881	0.0016441	0.00133148	3	7	6	8	6	0.00075663	0.00081845	0.00089146	0.00094912	0.000853915	6	7	7	8	7
DVL3	Segment polarity protein dishevelled homolog DVL-3 OS=Homo sapiens GN=DVL3 PE=1 SV=2	1.5582	0.0387737	0.0042421	0.0059344	0.005133	0.0076949	0.0057511	53	79	79	111	80.5	0.0030151	0.0043251	0.0036768	0.0037464	0.00369085	67	99	82	85	83.25
VPS51	Vacuolar protein sorting-associated protein 51 homolog OS=Homo sapiens GN=VPS51 PE=1 SV=2	1.55284	0.00110267	0.0014427	0.0012179	0.0013301	0.0011035	0.00127355	13	13	15	13	13.5	0.0007813	0.00082099	0.00089423	0.00078406	0.000820145	15	17	17	16	16.25
CPSF6	Cleavage and polyadenylation specificity factor subunit 6 OS=Homo sapiens GN=CPSF6 PE=1 SV=2	1.55062	0.00333391	0.00094499	0.0010637	0.0012585	0.00096378	0.00105774	6	8	10	8	8	0.00073924	0.00061686	0.00074654	0.00062593	0.000682142	10	9	10	9	9.5
RPS27	40S ribosomal protein S27 OS=Homo sapiens GN=RPS27 PE=1 SV=3	1.5464	0.0992289	0.0041325	0.0026164	0.0033021	0.0039512	0.00350055	4	3	4	5	4	0.0029094	0.0013488	0.0034279	0.0013686	0.00226367	6	3	7	3	4.75
CERS2	Ceramide synthase 2 OS=Homo sapiens GN=CERS2 PE=1 SV=1	1.53922	0.452506	0	0.00057836	0.00036497	0.00052405	0.000366845	0	3	2	3	2	0.00032157	0.00019877	0.00043299	0	0.000238333	3	2	4	0	2.25
NUDT21	Cleavage and polyadenylation specificity factor subunit 5 OS=Homo sapiens GN=NUDT21 PE=1 SV=1	1.53578	0.0674683	0.0022938	0.00355	0.0033603	0.002047	0.00281277	6	11	11	7	8.75	0.0025121	0.0016637	0.0016309	0.0015193	0.0018315	14	10	9	9	10.5
CACYBP	Calcyclin-binding protein OS=Homo sapiens GN=CACYBP PE=1 SV=2	1.53231	0.406007	0	0.00096394	0.0015207	0.002038	0.00113066	0	3	5	7	3.75	0.0007146	0.00066255	0.00090207	0.00067229	0.000737878	4	4	5	4	4.25
ANXA2	Annexin A2 OS=Homo sapiens GN=ANXA2 PE=1 SV=2	1.53208	0.00214872	0.0025599	0.0028094	0.0030683	0.0033288	0.0029416	10	13	15	17	13.75	0.0016821	0.0020052	0.0021841	0.0018086	0.00192	14	18	18	16	16.5
GLO1	Lactoylglutathione lyase OS=Homo sapiens GN=GLO1 PE=1 SV=4	1.52674	0.0377168	0.0014149	0.0011944	0.0015075	0.0010823	0.00129977	3	3	4	3	3.25	0.00066411	0.00082099	0.00067067	0.0012496	0.000851343	3	4	3	6	4
CPD	Carboxypeptidase D OS=Homo sapiens GN=CPD PE=1 SV=2	1.52584	0.0731308	0.00018866	0.00031852	0.0003015	0.00033671	0.000286348	3	6	6	7	5.5	0.00023613	0.00010946	0.00023846	0.00016661	0.000187665	8	4	8	6	6.5
JPT2	Jupiter microtubule associated homolog 2 OS=Homo sapiens GN=JPT2 PE=1 SV=1	1.52183	0.150166	0.00091349	0.0015423	0.0021898	0.0010481	0.00142342	2	4	6	3	3.75	0.0010719	0.00079506	0.00086599	0.0010084	0.000935338	5	4	4	5	4.5
FASN	Fatty acid synthase OS=Homo sapiens GN=FASN PE=1 SV=3	1.51049	0.000182643	0.0018317	0.0020423	0.0018779	0.0019827	0.00193365	53	70	68	75	66.5	0.001249	0.0013536	0.001114	0.001404	0.00128015	77	90	68	92	81.75
U2AF2	Splicing factor U2AF 65 kDa subunit OS=Homo sapiens GN=U2AF2 PE=1 SV=4	1.48877	0.00638507	0.001827	0.0024677	0.0018978	0.002236	0.00210713	10	16	13	16	13.75	0.0014578	0.0011926	0.0015588	0.0014522	0.00141535	17	15	18	18	17
PDCD5	Programmed cell death protein 5 OS=Homo sapiens GN=PDCD5 PE=1 SV=3	1.48121	0.00766851	0.0020828	0.0023443	0.0027738	0.0021242	0.00233127	3	4	5	4	4	0.0016293	0.0015106	0.0013163	0.0018394	0.0015739	5	5	4	6	5
SNAPIN	SNARE-associated protein Snapin OS=Homo sapiens GN=SNAPIN PE=1 SV=1	1.4747	0.456471	0	0.0021547	0.0020395	0.00097618	0.0012926	0	4	4	2	2.5	0.001198	0.00055537	0.00090738	0.00084531	0.000876515	4	2	3	3	3
XPO1	Exportin-1 OS=Homo sapiens GN=XPO1 PE=1 SV=1	1.46505	0.0239386	0.0005672	0.00061562	0.00064747	0.00068177	0.000628015	7	9	10	11	9.25	0.00034229	0.00056419	0.00030726	0.00050092	0.000428665	9	16	8	14	11.75
IRAK1	Interleukin-1 receptor-associated kinase 1 OS=Homo sapiens GN=IRAK1 PE=1 SV=2	1.45913	0.154683	0.00036565	0.00041157	0.00048697	0.00074584	0.000502508	3	4	5	8	5	0.00028604	0.00031825	0.00028887	0.00048439	0.000344387	5	6	5	9	6.25
HSPA8	Heat shock cognate 71 kDa protein OS=Homo sapiens GN=HSPA8 PE=1 SV=1	1.44961	0.00861223	0.0030898	0.0035155	0.0028983	0.0039047	0.00335207	24	34	31	41	32.5	0.0024591	0.0018707	0.002547	0.0023728	0.0023124	43	36	45	45	42.25
JUP	Junction plakoglobin OS=Homo sapiens GN=JUP PE=1 SV=3	1.41605	0.506818	0.00069891	0.00059001	0.0004654	0	0.00043858	6	6	5	0	4.25	0.00054674	0.00020277	0.0003865	0.00010287	0.00030972	10	4	7	2	5.75
PRDX1	Peroxiredoxin-1 OS=Homo sapiens GN=PRDX1 PE=1 SV=1	1.41276	0.561756	0	0.0022088	0.0010454	0.00066714	0.000980335	0	6	3	2	2.75	0.00081873	0.0007591	0.00062012	0.0005777	0.000693913	4	4	3	3	3.5
TIMM50	Mitochondrial import inner membrane translocase subunit TIM50 OS=Homo sapiens GN=TIMM50 PE=1 SV=2	1.40663	0.165604	0.00098336	0.0014527	0.0019644	0.00094023	0.00133517	4	7	10	5	6.5	0.0009231	0.00085587	0.00093223	0.0010856	0.0009492	8	8	8	10	8.5
HSPA5	78 kDa glucose-regulated protein OS=Homo sapiens GN=HSPA5 PE=1 SV=2	1.40424	0.0107724	0.0014596	0.0012322	0.0013784	0.0011165	0.00129667	13	15	16	14	14.5	0.0009965	0.00086618	0.0010692	0.00076173	0.000923402	20	19	21	18	19.5
TAGLN2	Transgelin-2 OS=Homo sapiens GN=TAGLN2 PE=1 SV=3	1.39923	0.3187	0.0030526	0.0029451	0.0073177	0.0033357	0.00416277	7	8	21	10	11.5	0.0030702	0.0022773	0.0028939	0.0036588	0.00297505	15	12	14	19	15
CTTN	Src substrate cortactin OS=Homo sapiens GN=CTTN PE=1 SV=2	1.39319	0.0215142	0.0020512	0.0029304	0.0020173	0.0022931	0.002323	13	22	16	19	17.5	0.0016293	0.0016479	0.0017202	0.0016722	0.0016674	22	24	23	24	23.25
RABL6	Rab-like protein 6 OS=Homo sapiens GN=RABL6 PE=1 SV=2	1.38827	0.0851161	0.00023808	0.00040197	0.00028537	0.00027317	0.000299647	2	4	3	3	3	0.00016762	0.00020722	0.0002257	0.00026283	0.000215843	3	4	4	5	4
KRT8	Keratin, type II cytoskeletal 8 OS=Homo sapiens GN=KRT8 PE=1 SV=7	1.38524	0.110285	0.00071869	0.00075838	0.001005	0.0012369	0.000929743	27	19	24	29	24.75	0.00059032	0.00062551	0.00059615	0.00087273	0.000671177	29	28	25	28	27.5
RAB3GAP1	Rab3 GTPase-activating protein catalytic subunit OS=Homo sapiens GN=RAB3GAP1 PE=1 SV=3	1.38312	0.000318729	0.0022116	0.0019416	0.0019086	0.0021653	0.00205678	25	26	27	32	27.5	0.0014948	0.0015014	0.0014676	0.0014844	0.00148705	36	39	35	38	37
ATP2B1	Plasma membrane calcium-transporting ATPase 1 OS=Homo sapiens GN=ATP2B1 PE=1 SV=3	1.38311	0.195076	0.00020695	0.00023294	0.00022049	0.00026383	0.000231052	3	4	4	5	4	0.00019427	6.004e-05	0.00026159	0.00015231	0.000167053	6	2	8	5	5.25
CANX	Calnexin OS=Homo sapiens GN=CANX PE=1 SV=2	1.37816	0.0653138	0.00043977	0.0002475	0.00035141	0.00033639	0.000343768	3	2	3	3	2.75	0.00027522	0.00025517	0.00020845	0.00025892	0.00024944	4	4	3	4	3.75
HIST1H1E	Histone H1.4 OS=Homo sapiens GN=HIST1H1E PE=1 SV=2	1.37275	0.100658	0.0019813	0.0013381	0.0018998	0.0012124	0.0016079	5	4	6	4	4.75	0.0011159	0.0013796	0.0013148	0.0008749	0.0011713	6	8	7	5	6.5
CSE1L	Exportin-2 OS=Homo sapiens GN=CSE1L PE=1 SV=3	1.36242	0.043644	0.0016087	0.0011317	0.001714	0.0012305	0.00142122	18	15	24	18	18.75	0.00096481	0.001089	0.00097435	0.0011445	0.00104316	23	28	23	29	25.75
GLUD1	Glutamate dehydrogenase 1, mitochondrial OS=Homo sapiens GN=GLUD1 PE=1 SV=2	1.34839	0.286119	0.00062209	0.00052516	0.0011185	0.0011896	0.000863837	4	4	9	10	6.75	0.00087596	0.00047376	0.00066346	0.0005494	0.000640645	12	7	9	8	9
ATP5B	ATP synthase subunit beta, mitochondrial OS=Homo sapiens GN=ATP5B PE=1 SV=3	1.33251	0.160138	0.0026248	0.0018003	0.0027528	0.0027606	0.00248462	16	13	21	22	18	0.0023099	0.0013564	0.0024883	0.0013039	0.00186462	30	19	32	18	24.75
EIF4G3	Eukaryotic translation initiation factor 4 gamma 3 OS=Homo sapiens GN=EIF4G3 PE=1 SV=2	1.32575	0.00150334	0.0021353	0.0021261	0.0021	0.0025128	0.00221855	39	46	48	60	48.25	0.0016704	0.001644	0.0016869	0.0016924	0.00167343	65	69	65	70	67.25
FAM83B	Protein FAM83B OS=Homo sapiens GN=FAM83B PE=1 SV=1	1.31834	0.83233	0	0	0.00020577	0	5.14425e-05	0	0	3	0	0.75	0	7.4709e-05	8.1374e-05	0	3.90208e-05	0	2	2	0	1
FRG1	Protein FRG1 OS=Homo sapiens GN=FRG1 PE=1 SV=1	1.29705	0.616986	0	0.0005679	0.00053755	0.00051457	0.000405005	0	2	2	2	1.5	0.00047363	0	0.00047831	0.00029706	0.00031225	3	0	3	2	2
TRAPPC5	Trafficking protein particle complex subunit 5 OS=Homo sapiens GN=TRAPPC5 PE=1 SV=1	1.29353	0.0234438	0.002308	0.0019484	0.002582	0.0021185	0.00223923	5	5	7	6	5.75	0.0015166	0.0018079	0.0019692	0.0016307	0.0017311	7	9	9	8	8.25
PCBP1	Poly(rC)-binding protein 1 OS=Homo sapiens GN=PCBP1 PE=1 SV=2	1.29146	0.0797262	0.0014626	0.0016463	0.0017531	0.0016781	0.00163503	6	8	9	9	8	0.00080091	0.0014852	0.001271	0.001507	0.00126603	7	14	11	14	11.5
SRSF2	Serine/arginine-rich splicing factor 2 OS=Homo sapiens GN=SRSF2 PE=1 SV=4	1.27361	0.753268	0	0.00066298	0	0.00090109	0.000391017	0	2	0	3	1.25	0.00036862	0.00051265	0	0.00034679	0.000307015	2	3	0	2	1.75
RPL37A	60S ribosomal protein L37a OS=Homo sapiens GN=RPL37A PE=1 SV=2	1.26646	0.309332	0.0018866	0.0031852	0.0015075	0.0021646	0.00218597	2	4	2	3	2.75	0.001771	0.0012315	0.0022356	0.0016661	0.00172605	4	3	5	4	4
CHORDC1	Cysteine and histidine-rich domain-containing protein 1 OS=Homo sapiens GN=CHORDC1 PE=1 SV=2	1.26065	0.21279	0.0010456	0.0017653	0.0016709	0.0011996	0.00142035	4	8	8	6	6.5	0.00085881	0.0010238	0.001239	0.0013851	0.00112668	7	9	10	12	9.5
DBT	Lipoamide acyltransferase component of branched-chain alpha-keto acid dehydrogenase complex, mitochondrial OS=Homo sapiens GN=DBT PE=1 SV=3	1.23512	0.298028	0.0014404	0.0031918	0.0028774	0.0027544	0.002566	8	21	20	20	17.25	0.0022817	0.0016454	0.0024749	0.0019081	0.00207752	27	21	29	24	25.25
RUVBL2	RuvB-like 2 OS=Homo sapiens GN=RUVBL2 PE=1 SV=3	1.22913	0.0284597	0.0074973	0.0068038	0.0059909	0.0075986	0.00697265	40	43	40	53	44	0.0054544	0.0064438	0.0053306	0.0054626	0.00567285	62	79	60	66	66.75
EMD	Emerin OS=Homo sapiens GN=EMD PE=1 SV=1	1.22855	0.345573	0.001025	0.00057685	0.00081903	0.0010454	0.00086657	3	2	3	4	3	0.00096217	0.00044605	0.00080973	0.00060348	0.000705357	6	3	5	4	4.5
TNRC6A	Trinucleotide repeat-containing gene 6A protein OS=Homo sapiens GN=TNRC6A PE=1 SV=2	1.22089	0.370689	0.00013269	0.00026137	0.00031809	0.00033833	0.00026262	3	7	9	10	7.25	0.00018684	0.00023098	0.00018869	0.00025391	0.000215105	9	12	9	13	10.75
PDLIM1	PDZ and LIM domain protein 1 OS=Homo sapiens GN=PDLIM1 PE=1 SV=4	1.21138	0.354077	0.0013189	0.0022267	0.00274	0.0018159	0.00202537	5	10	13	9	9.25	0.0018571	0.0020662	0.0012503	0.0015142	0.00167195	15	18	10	13	14
BICD2	Protein bicaudal D homolog 2 OS=Homo sapiens GN=BICD2 PE=1 SV=1	1.21084	0.0410759	0.0038968	0.0032896	0.0035345	0.0032223	0.0034858	37	37	42	40	39	0.0030154	0.0029332	0.0031949	0.0023718	0.00287883	61	64	64	51	60
KIF11	Kinesin-like protein KIF11 OS=Homo sapiens GN=KIF11 PE=1 SV=2	1.20477	0.1271	0.0012327	0.0013875	0.0014447	0.0017601	0.00145625	15	20	22	28	21.25	0.0011957	0.001359	0.00097383	0.0013064	0.00120873	31	38	25	36	32.5
PTPN23	Tyrosine-protein phosphatase non-receptor type 23 OS=Homo sapiens GN=PTPN23 PE=1 SV=1	1.19294	0.811403	0	0	0.00012716	0.00024345	9.26525e-05	0	0	3	6	2.25	7.4692e-05	0.00011542	5.0287e-05	7.027e-05	7.76672e-05	3	5	2	3	3.25
TUBB4B	Tubulin beta-4B chain OS=Homo sapiens GN=TUBB4B PE=1 SV=1	1.19079	0.523211	0.00039003	0.0011524	0.0015583	0.0013425	0.00111081	30	49	58	59	49	0.0010984	0.00093353	0.00092437	0.00077503	0.000932832	81	99	73	101	88.5
IFT74	Intraflagellar transport protein 74 homolog OS=Homo sapiens GN=IFT74 PE=1 SV=1	1.18944	0.49734	0.00072318	0.00073259	0.001618	0.0014382	0.00112799	5	6	14	13	9.5	0.00088253	0.0010071	0.00075413	0.0011496	0.00094834	13	16	11	18	14.5
TRIP11	Thyroid receptor-interacting protein 11 OS=Homo sapiens GN=TRIP11 PE=1 SV=3	1.1821	0.0487788	0.0013155	0.0017028	0.0014366	0.00161	0.00151622	30	46	41	48	41.25	0.0013173	0.0012022	0.0013718	0.0012393	0.00128265	64	63	66	64	64.25
IRS4	Insulin receptor substrate 4 OS=Homo sapiens GN=IRS4 PE=1 SV=1	1.17971	0.216202	0.0016569	0.0017484	0.0023722	0.0015314	0.00182723	24	30	43	29	31.5	0.001523	0.0014421	0.0017671	0.0014633	0.00154887	47	48	54	48	49.25
HSPA1A	Heat shock 70 kDa protein 1A OS=Homo sapiens GN=HSPA1A PE=1 SV=1	1.16714	0.000250285	0.0060923	0.0057145	0.0060582	0.0061099	0.00599373	45	50	56	59	52.5	0.0050836	0.0053025	0.0051338	0.0050217	0.0051354	80	90	80	84	83.5
RAB3GAP2	Rab3 GTPase-activating protein non-catalytic subunit OS=Homo sapiens GN=RAB3GAP2 PE=1 SV=1	1.16227	0.166387	0.001246	0.0018933	0.0014436	0.0015725	0.00153885	20	36	29	33	29.5	0.0013158	0.0013013	0.0013584	0.0013205	0.001324	45	48	46	48	46.75
ZC3HAV1	Zinc finger CCCH-type antiviral protein 1 OS=Homo sapiens GN=ZC3HAV1 PE=1 SV=3	1.14782	0.45568	0.00048105	0.00032488	0.00038439	0.00036796	0.00038957	5	4	5	5	4.75	0.0003161	0.00020934	0.00036483	0.00046733	0.0003394	7	5	8	11	7.75
PHGDH	D-3-phosphoglycerate dehydrogenase OS=Homo sapiens GN=PHGDH PE=1 SV=4	1.14313	0.689695	0.00048845	0.00082468	0.0002602	0.00037362	0.000486738	3	6	2	3	3.5	0.00022926	0.00042513	0.0006174	0.00043138	0.000425792	3	6	8	6	5.75
TUFM	Elongation factor Tu, mitochondrial OS=Homo sapiens GN=TUFM PE=1 SV=2	1.1377	0.686819	0.00076798	0.00081039	0.0021478	0.0011749	0.00122527	4	5	14	8	7.75	0.0013517	0.00091907	0.0012741	0.00076302	0.00107697	15	11	14	9	12.25
SYAP1	Synapse-associated protein 1 OS=Homo sapiens GN=SYAP1 PE=1 SV=1	1.1367	0.616375	0.0012327	0.00062437	0.001576	0.00075432	0.00104685	5	3	8	4	5	0.00081001	0.0008583	0.00081801	0.0011975	0.000920955	7	8	7	11	8.25
ANKHD1	Ankyrin repeat and KH domain-containing protein 1 OS=Homo sapiens GN=ANKHD1 PE=1 SV=1	1.13382	0.389133	0.00047795	0.00063403	0.00054559	0.00070506	0.000590658	14	22	20	27	20.75	0.00046468	0.00051998	0.00042073	0.00067838	0.000520942	29	35	26	45	33.75
RPL23	60S ribosomal protein L23 OS=Homo sapiens GN=RPL23 PE=1 SV=1	1.13046	0.55772	0.0068186	0.0041862	0.0054485	0.0037931	0.0050616	11	8	11	8	9.5	0.0055279	0.0029673	0.0055825	0.0038321	0.00447745	19	11	19	14	15.75
ECM29	Proteasome-associated protein ECM29 homolog OS=Homo sapiens GN=ECM29 PE=1 SV=2	1.11434	0.6825	0.00018814	0.00015883	0.00030068	0.00017989	0.000206885	4	4	8	5	5.25	0.00017662	0.00016375	0.00011148	0.00029078	0.000185657	8	8	5	14	8.75
TNRC6B	Trinucleotide repeat-containing gene 6B protein OS=Homo sapiens GN=TNRC6B PE=1 SV=4	1.10075	0.38399	0.00023672	0.00019983	0.00018915	0.00018107	0.000201692	5	5	5	5	5	0.00015555	0.00016482	0.00022441	0.00018815	0.000183233	7	8	10	9	8.5
TLN1	Talin-1 OS=Homo sapiens GN=TLN1 PE=1 SV=3	1.07995	0.687968	0.00051229	0.00086493	0.0012281	0.0011233	0.000932155	15	30	45	43	33.25	0.00086561	0.00093633	0.00076085	0.00088978	0.000863142	54	63	47	59	55.75
HSPD1	60 kDa heat shock protein, mitochondrial OS=Homo sapiens GN=HSPD1 PE=1 SV=2	1.07158	0.676481	0.00075726	0.0015342	0.0015733	0.001506	0.00134269	5	12	13	13	10.75	0.0012795	0.0013182	0.0010768	0.0013375	0.001253	18	20	15	20	18.25
TUBA1C	Tubulin alpha-1C chain OS=Homo sapiens GN=TUBA1C PE=1 SV=1	1.06098	0.420289	0.0073446	0.0068528	0.0078765	0.0068006	0.00721863	38	42	51	46	44.25	0.006078	0.0073176	0.0061381	0.0076812	0.00680373	67	87	67	90	77.75
PFDN2	Prefoldin subunit 2 OS=Homo sapiens GN=PFDN2 PE=1 SV=1	1.05743	0.930138	0	0.0019028	0.0013509	0	0.000813425	0	4	3	0	1.75	0.00079348	0.00073569	0.00080132	0.00074651	0.00076925	3	3	3	3	3
SPART	Spartin OS=Homo sapiens GN=SPART PE=1 SV=1	1.0448	0.657443	0.0014333	0.00165	0.0014577	0.001196	0.00143425	11	15	14	12	13	0.0013455	0.0016444	0.0012353	0.0012658	0.00137275	22	29	20	22	23.25
LSM14A	Protein LSM14 homolog A OS=Homo sapiens GN=LSM14A PE=1 SV=3	1.04445	0.847934	0.00093717	0.00063291	0.00059909	0.00057348	0.000685662	5	4	4	4	4.25	0.00043987	0.00057097	0.0006219	0.00099319	0.000656482	5	7	7	12	7.75
STMN1	Stathmin OS=Homo sapiens GN=STMN1 PE=1 SV=3	1.04356	0.619452	0.0034946	0.0024584	0.0027924	0.0031185	0.00296598	6	5	6	7	6	0.0027337	0.0027881	0.0027607	0.0030862	0.00284217	10	11	10	12	10.75
EEF1G	Elongation factor 1-gamma OS=Homo sapiens GN=EEF1G PE=1 SV=3	1.03522	0.906591	0.00039717	0.00033528	0.00047605	0.0003038	0.000378075	2	2	3	2	2.25	0.00027962	0.00025926	0.0006589	0.00026307	0.000365213	3	3	7	3	4
MYH9	Myosin-9 OS=Homo sapiens GN=MYH9 PE=1 SV=4	1.03174	0.585978	0.003365	0.0030276	0.0027596	0.0031497	0.00307547	76	81	78	93	82	0.002764	0.0028709	0.0030431	0.0032455	0.00298088	133	149	145	166	148.25
PEBP1	Phosphatidylethanolamine-binding protein 1 OS=Homo sapiens GN=PEBP1 PE=1 SV=3	1.03133	0.960524	0	0	0.0011125	0.0010649	0.00054435	0	0	3	3	1.5	0.00043564	0.00060586	0.00065991	0.00040985	0.000527815	2	3	3	2	2.5
FANCI	Fanconi anemia group I protein OS=Homo sapiens GN=FANCI PE=1 SV=4	1.03014	0.857508	0.00019604	0.00027583	0.00026109	0.00014995	0.000220727	3	5	5	3	4	0.00018403	0.0002275	0.00018585	0.0002597	0.00021427	6	8	6	9	7.25
RUVBL1	RuvB-like 1 OS=Homo sapiens GN=RUVBL1 PE=1 SV=1	1.02319	0.824487	0.0066609	0.004659	0.0050183	0.0045127	0.00521272	35	29	33	31	32	0.0048235	0.0053832	0.0049614	0.0052103	0.0050946	54	65	55	62	59
TUBB	Tubulin beta chain OS=Homo sapiens GN=TUBB PE=1 SV=2	1.02305	0.812039	0.0074273	0.0094049	0.0099956	0.0092693	0.00902428	38	57	64	62	55.25	0.0079813	0.0098666	0.0075969	0.0098391	0.00882097	87	116	82	114	99.75
DNAJA1	DnaJ homolog subfamily A member 1 OS=Homo sapiens GN=DNAJA1 PE=1 SV=2	1.00893	0.964897	0.001093	0.00092266	0.0013974	0.0015048	0.00122946	5	5	8	9	6.75	0.0017442	0.0010464	0.00082891	0.0012548	0.00121858	17	11	8	13	12.25
SBSN	Suprabasin OS=Homo sapiens GN=SBSN PE=1 SV=2	1.00552	0.993845	0.00029418	0.00037251	0	0	0.000166672	2	3	0	0	1.25	0.00027615	0.00019203	0	0.00019485	0.000165757	4	3	0	3	2.5
FAU	40S ribosomal protein S30 OS=Homo sapiens GN=FAU PE=1 SV=1	1.00126	0.999093	0	0	0.0047013	0	0.00117533	0	0	4	0	1	0.0013807	0.0019203	0.0013944	0	0.00117385	2	3	2	0	1.75
PRPF40A	Pre-mRNA-processing factor 40 homolog A OS=Homo sapiens GN=PRPF40A PE=1 SV=2	0.998977	0.997276	0.00018136	0.00061241	0.0007246	0.00034681	0.000466295	2	8	10	5	6.25	0.00055331	0.00039462	0.00055878	0.00036038	0.000466773	13	10	13	9	11.25
YWHAE	14-3-3 protein epsilon OS=Homo sapiens GN=YWHAE PE=1 SV=1	0.998112	0.994669	0.00068064	0.00057458	0.0010878	0.00078094	0.00078099	2	2	4	3	2.75	0.0012779	0.0004443	0.00080656	0.00060111	0.000782467	8	3	5	4	5
STUB1	E3 ubiquitin-protein ligase CHIP OS=Homo sapiens GN=STUB1 PE=1 SV=2	0.99048	0.981096	0	0.00048356	0.00068658	0.0008763	0.00051161	0	2	3	4	2.25	0.00040329	0.00062319	0.00040727	0.00063236	0.000516527	3	5	3	5	4
HAUS5	HAUS augmin-like complex subunit 5 OS=Homo sapiens GN=HAUS5 PE=1 SV=2	0.990311	0.948175	0.0012339	0.0011573	0.0018623	0.0011535	0.00135175	9	10	17	11	11.75	0.001287	0.0016108	0.0011697	0.0013924	0.00136498	20	27	18	23	22
UBR4	E3 ubiquitin-protein ligase UBR4 OS=Homo sapiens GN=UBR4 PE=1 SV=1	0.989365	0.988034	0	0	2.6758e-05	2.5615e-05	1.30933e-05	0	0	2	2	1	2.3576e-05	1.4573e-05	0	1.4787e-05	1.3234e-05	3	2	0	2	1.75
EIF4G1	Eukaryotic translation initiation factor 4 gamma 1 OS=Homo sapiens GN=EIF4G1 PE=1 SV=4	0.987551	0.8422	0.00092263	0.0011912	0.0010408	0.0010378	0.00104811	21	30	30	30	27.75	0.0010444	0.0010864	0.0011319	0.00098258	0.00106132	46	49	51	46	48
CSNK2B	Casein kinase II subunit beta OS=Homo sapiens GN=CSNK2B PE=1 SV=1	0.987399	0.954294	0.0016145	0.0010222	0.00064506	0.001235	0.00112919	4	3	2	4	3.25	0.0007578	0.0012296	0.0013393	0.0012477	0.0011436	4	7	7	7	6.25
BCAS3	Breast carcinoma-amplified sequence 3 OS=Homo sapiens GN=BCAS3 PE=1 SV=3	0.983778	0.953111	0.00037406	0.00031577	0.00037362	0.0007153	0.000444687	4	4	5	10	5.75	0.00035114	0.00065113	0.00031028	0.00049553	0.00045202	8	16	7	12	10.75
CAD	CAD protein OS=Homo sapiens GN=CAD PE=1 SV=3	0.971861	0.799247	0.00054604	0.00082314	0.00065448	0.00068618	0.00067746	14	25	21	23	20.75	0.00062242	0.00078077	0.00061008	0.00077503	0.000697075	34	46	33	45	39.5
KIAA0355	Uncharacterized protein KIAA0355 OS=Homo sapiens GN=KIAA0355 PE=1 SV=2	0.965984	0.962375	0	0.00013693	0	0.00024815	9.627e-05	0	2	0	4	1.5	0.0001142	0.00014118	0	0.00014326	9.966e-05	3	4	0	4	2.75
ATP5O	ATP synthase subunit O, mitochondrial OS=Homo sapiens GN=ATP5O PE=1 SV=1	0.952168	0.895905	0.0012223	0.0010318	0.0013022	0	0.000889075	3	3	4	0	2.5	0.0011474	0.00070921	0.0011587	0.00071964	0.000933738	6	4	6	4	5
SLK	STE20-like serine/threonine-protein kinase OS=Homo sapiens GN=SLK PE=1 SV=1	0.923308	0.77016	0.00028107	0.00065251	0.00028075	0.00053749	0.000437955	4	11	5	10	7.5	0.00032981	0.00061159	0.00036638	0.00058955	0.000474333	10	20	11	19	15
NUP88	Nuclear pore complex protein Nup88 OS=Homo sapiens GN=NUP88 PE=1 SV=2	0.921009	0.300457	0.0015225	0.001483	0.0014037	0.0013437	0.00143823	13	15	15	15	14.5	0.001759	0.001529	0.0016654	0.0012929	0.00156157	32	30	30	25	29.25
WNK1	Serine/threonine-protein kinase WNK1 OS=Homo sapiens GN=WNK1 PE=1 SV=2	0.916472	0.574069	0.00043719	0.00052284	0.00040756	0.00072455	0.000523035	12	17	14	26	17.25	0.0005472	0.00050734	0.0005526	0.00067568	0.000570705	32	32	32	42	34.5
MYL6	Myosin light polypeptide 6 OS=Homo sapiens GN=MYL6 PE=1 SV=2	0.911214	0.354735	0.0034483	0.0024258	0.0027554	0.0035168	0.00303658	6	5	6	8	6.25	0.0035067	0.0030012	0.003269	0.0035529	0.00333245	13	12	12	14	12.75
IFT81	Intraflagellar transport protein 81 homolog OS=Homo sapiens GN=IFT81 PE=1 SV=1	0.895277	0.400195	0.00089863	0.0011921	0.00092322	0.0013747	0.00109716	7	11	9	14	10.25	0.0010846	0.0013408	0.0013995	0.0010771	0.0012255	18	24	23	19	21
PUF60	Poly(U)-binding-splicing factor PUF60 OS=Homo sapiens GN=PUF60 PE=1 SV=1	0.894505	0.688169	0.00062098	0.00091738	0.0004962	0.0002375	0.000568015	4	7	4	2	4.25	0.00065579	0.00047291	0.00058869	0.00082263	0.000635005	9	7	8	12	9
HSP90AA1	Heat shock protein HSP 90-alpha OS=Homo sapiens GN=HSP90AA1 PE=1 SV=5	0.883755	0.265507	0.00059277	0.00050041	0.0005684	0.00072546	0.00059676	11	14	12	14	12.75	0.00066774	0.0006707	0.00078672	0.00057586	0.000675255	19	22	22	19	20.5
WIPI2	WD repeat domain phosphoinositide-interacting protein 2 OS=Homo sapiens GN=WIPI2 PE=1 SV=1	0.872424	0.844226	0	0	0.00045822	0.00058485	0.000260768	0	0	3	4	1.75	0.00035887	0.0004991	0	0.00033763	0.0002989	4	6	0	4	3.5
HAUS8	HAUS augmin-like complex subunit 8 OS=Homo sapiens GN=HAUS8 PE=1 SV=3	0.869626	0.40297	0.00063499	0.00089341	0.0005074	0.00097142	0.000751805	3	5	3	6	4.25	0.00099346	0.00092111	0.0007023	0.00084119	0.000864515	10	10	7	9	9
DYNC1H1	Cytoplasmic dynein 1 heavy chain 1 OS=Homo sapiens GN=DYNC1H1 PE=1 SV=5	0.869241	0.235931	0.00033622	0.00045728	0.00050747	0.0004572	0.000439542	18	29	34	32	28.25	0.00052603	0.00052023	0.00040727	0.00056912	0.000505662	60	64	46	69	59.75
SH3GL1	Endophilin-A2 OS=Homo sapiens GN=SH3GL1 PE=1 SV=1	0.866753	0.511439	0.00047164	0.0013935	0.0011306	0.0009019	0.00097441	2	7	6	5	5	0.0013282	0.0011289	0.00089423	0.0011455	0.00112421	12	11	8	11	10.5
VCPIP1	Deubiquitinating protein VCIP135 OS=Homo sapiens GN=VCPIP1 PE=1 SV=2	0.866271	0.7015	0.00021305	0.00017985	0	0.00016296	0.000138965	3	3	0	3	2.25	0.00016666	0.00015452	0.00010098	0.00021951	0.000160418	5	5	3	7	5
TUBA1B	Tubulin alpha-1B chain OS=Homo sapiens GN=TUBA1B PE=1 SV=1	0.865326	0.470298	0.0025015	0.0030863	0.0041514	0.0033852	0.0032811	50	60	76	67	63.25	0.0024385	0.0048567	0.0032835	0.0045883	0.00379175	91	139	99	139	117
NUP62	Nuclear pore glycoprotein p62 OS=Homo sapiens GN=NUP62 PE=1 SV=3	0.860899	0.459676	0.00066499	0.0016841	0.0013284	0.0013988	0.00126907	4	12	10	11	9.25	0.0018727	0.001447	0.001182	0.0013948	0.00147412	24	20	15	19	19.5
AHNAK	Neuroblast differentiation-associated protein AHNAK OS=Homo sapiens GN=AHNAK PE=1 SV=2	0.852766	0.103881	0.00064828	0.00080846	0.00084767	0.00082271	0.00078178	41	62	69	67	59.75	0.0010581	0.00084636	0.00094281	0.00081976	0.000916757	148	125	129	120	130.5
MTAP	S-methyl-5'-thioadenosine phosphorylase OS=Homo sapiens GN=MTAP PE=1 SV=2	0.84853	0.695865	0.0012266	0.0007766	0	0.00046912	0.00061808	4	3	0	2	2.25	0.00057572	0.00093413	0.00072676	0.00067704	0.000728412	4	7	5	5	5.25
ZYX	Zyxin OS=Homo sapiens GN=ZYX PE=1 SV=1	0.846764	0.647843	0	0.00038423	0.00048492	0.00034815	0.000304325	0	3	4	3	2.5	0.00028484	0.00039614	0.00028765	0.00046896	0.000359398	4	6	4	7	5.25
HSPA9	Stress-70 protein, mitochondrial OS=Homo sapiens GN=HSPA9 PE=1 SV=2	0.843613	0.317085	0.0010225	0.0017263	0.0019404	0.0013687	0.00151447	8	16	19	14	14.25	0.0019196	0.001613	0.0021809	0.0014674	0.00179522	32	29	36	26	30.75
TBC1D5	TBC1 domain family member 5 OS=Homo sapiens GN=TBC1D5 PE=1 SV=1	0.840627	0.693499	0.00032748	0.00027645	0.00026168	0	0.000216402	3	3	3	0	2.25	0.00010247	0.00042753	0.00025871	0.00024101	0.00025743	2	9	5	5	5.25
CHMP4B	Charged multivesicular body protein 4b OS=Homo sapiens GN=CHMP4B PE=1 SV=1	0.839236	0.267942	0.00077484	0.00098115	0.00061914	0.00088902	0.000816037	2	3	2	3	2.5	0.0012729	0.00084298	0.00091818	0.00085537	0.000972358	7	5	5	5	5.5
RPS16	40S ribosomal protein S16 OS=Homo sapiens GN=RPS16 PE=1 SV=2	0.836797	0.308023	0.0011888	0.0010036	0.00094992	0.001364	0.00112658	2	2	2	3	2.25	0.0011159	0.0018107	0.0014087	0.0010499	0.0013463	4	7	5	4	5
ACTG1	Actin, cytoplasmic 2 OS=Homo sapiens GN=ACTG1 PE=1 SV=1	0.831047	0.322443	0.0025456	0.0023443	0.0040682	0.0026552	0.00290333	11	12	22	15	15	0.0042361	0.0029205	0.0040586	0.0027591	0.00349357	39	29	37	27	33
SEC23IP	SEC23-interacting protein OS=Homo sapiens GN=SEC23IP PE=1 SV=1	0.829521	0.682826	0	0.0003663	0.00027738	0.00013276	0.00019411	0	5	4	2	2.75	0.0001222	0.00033989	0.00020567	0.00026825	0.000234002	3	9	5	7	6
RPL23A	60S ribosomal protein L23a OS=Homo sapiens GN=RPL23A PE=1 SV=1	0.82933	0.25139	0.0011126	0.00093922	0.00088903	0.00085103	0.00094797	2	2	2	2	2	0.0015666	0.00096834	0.0010547	0.00098258	0.00114306	6	4	4	4	4.5
PCBP2	Poly(rC)-binding protein 2 OS=Homo sapiens GN=PCBP2 PE=1 SV=1	0.827113	0.529166	0.00047552	0.00060213	0.00056995	0.00090932	0.00063923	3	4	5	6	4.5	0.00044638	0.0012416	0.00056349	0.00083991	0.000772845	4	15	8	10	9.25
FLNA	Filamin-A OS=Homo sapiens GN=FLNA PE=1 SV=4	0.819672	0.0554003	0.0042948	0.0037086	0.0033533	0.0032601	0.0036542	131	134	128	130	130.75	0.0050011	0.0039378	0.0047242	0.0041694	0.00445813	325	276	304	288	298.25
RNF219	RING finger protein 219 OS=Homo sapiens GN=RNF219 PE=1 SV=1	0.815189	0.0308985	0.0014344	0.0014127	0.0013372	0.0018287	0.00150325	12	14	14	20	15	0.0018515	0.0019247	0.0016998	0.0019002	0.00184405	33	37	30	36	34
DNAJA3	DnaJ homolog subfamily A member 3, mitochondrial OS=Homo sapiens GN=DNAJA3 PE=1 SV=2	0.814096	0.543983	0.00036159	0	0.0004334	0.00027658	0.000267892	2	0	3	2	1.75	0.00033943	0.00031471	0.00034279	0.00031934	0.000329068	4	4	4	4	4
PALLD	Palladin OS=Homo sapiens GN=PALLD PE=1 SV=3	0.805698	0.0171187	0.0011295	0.0010065	0.00080225	0.0010079	0.000986537	18	19	16	21	18.5	0.0012075	0.0012834	0.00116	0.0012469	0.00122445	41	47	39	45	43
DSP	Desmoplakin OS=Homo sapiens GN=DSP PE=1 SV=3	0.792046	0.0947084	0.00057431	0.00068896	0.00043476	0.00039305	0.00052277	19	27	18	17	20.25	0.00065262	0.0006314	0.00070205	0.00065403	0.000660025	46	48	49	49	48
CCT8	T-complex protein 1 subunit theta OS=Homo sapiens GN=CCT8 PE=1 SV=4	0.779188	0.00760919	0.0042757	0.0049463	0.0050616	0.0049664	0.0048125	27	37	40	41	36.25	0.0061693	0.0061334	0.0054796	0.0069229	0.0061763	83	89	73	99	86
C1QBP	Complement component 1 Q subcomponent-binding protein, mitochondrial OS=Homo sapiens GN=C1QBP PE=1 SV=1	0.777919	0.0728905	0.0015387	0.0010391	0.0012295	0.0016477	0.00136375	5	4	5	7	5.25	0.0020222	0.0014731	0.0017504	0.0017666	0.00175307	14	11	12	13	12.5
SFSWAP	Splicing factor, suppressor of white-apricot homolog OS=Homo sapiens GN=SFSWAP PE=1 SV=3	0.774956	0.678631	0	0.0004622	0	0.0002094	0.0001679	0	6	0	3	2.25	0.00021415	0.00027798	0.00017302	0.00020148	0.000216657	5	7	4	5	5.25
TBCB	Tubulin-folding cofactor B OS=Homo sapiens GN=TBCB PE=1 SV=2	0.768943	0.162107	0.00071133	0.00060049	0.0005684	0.0010882	0.000742105	2	2	2	4	2.5	0.00083467	0.0010834	0.00084292	0.0010994	0.000965098	5	7	5	7	6
CNN3	Calponin-3 OS=Homo sapiens GN=CNN3 PE=1 SV=1	0.766777	0.505232	0	0.00089069	0.00084309	0.00080705	0.000635207	0	4	4	4	3	0.00061903	0.0012627	0.00050011	0.00093181	0.000828413	5	11	4	8	7
CCT3	T-complex protein 1 subunit gamma OS=Homo sapiens GN=CCT3 PE=1 SV=4	0.765873	0.000778512	0.0038216	0.004167	0.0035626	0.0040193	0.00389263	24	31	28	33	29	0.0048579	0.0048506	0.0052078	0.0054141	0.0050826	65	70	69	77	70.25
DSG1	Desmoglein-1 OS=Homo sapiens GN=DSG1 PE=1 SV=2	0.765392	0.826014	0	0.00020951	0	0	5.23775e-05	0	3	0	0	0.75	7.7659e-05	0	0.00019607	0	6.84323e-05	2	0	5	0	1.75
FARSA	Phenylalanine--tRNA ligase alpha subunit OS=Homo sapiens GN=FARSA PE=1 SV=3	0.764209	0.499102	0	0.00057685	0.00027301	0.00039201	0.000310467	0	4	2	3	2.25	0.00024054	0.00044605	0.00048584	0.00045261	0.00040626	3	6	6	6	5.25
PDLIM5	PDZ and LIM domain protein 5 OS=Homo sapiens GN=PDLIM5 PE=1 SV=5	0.762548	0.577759	0	0.00024584	0.00034905	0.0004455	0.000260097	0	2	3	4	2.25	0.00020503	0.00050692	0.00013804	0.00051437	0.00034109	3	8	2	8	5.25
EIF4G2	Eukaryotic translation initiation factor 4 gamma 2 OS=Homo sapiens GN=EIF4G2 PE=1 SV=1	0.758143	0.123064	0.00028704	0.00032308	0.00022936	0.00043912	0.00031965	3	4	3	6	4	0.00035927	0.00049965	0.00036282	0.00046475	0.000421623	8	12	8	11	9.75
C16orf70	UPF0183 protein C16orf70 OS=Homo sapiens GN=C16orf70 PE=1 SV=1	0.754943	0.464978	0	0.0003472	0.00049297	0.00062919	0.00036734	0	2	3	4	2.25	0.00048261	0.00062644	0.00029243	0.00054484	0.00048658	5	7	3	6	5.25
CCT5	T-complex protein 1 subunit epsilon OS=Homo sapiens GN=CCT5 PE=1 SV=1	0.724858	0.00236885	0.0068976	0.0050103	0.0055116	0.006503	0.00598062	43	37	43	53	44	0.0083572	0.0085164	0.0079836	0.0081458	0.00825075	111	122	105	115	113.25
PGAM1	Phosphoglycerate mutase 1 OS=Homo sapiens GN=PGAM1 PE=1 SV=2	0.724849	0.639752	0	0	0.00054602	0.00078402	0.00033251	0	0	2	3	1.25	0	0.00059473	0.00048584	0.00075435	0.00045873	0	4	3	5	3
TCP1	T-complex protein 1 subunit alpha OS=Homo sapiens GN=TCP1 PE=1 SV=1	0.718751	0.021457	0.0046825	0.0043481	0.003991	0.0034623	0.00412097	30	33	32	29	31	0.0050549	0.0067244	0.0048829	0.0062719	0.00573352	69	99	66	91	81.25
NUP214	Nuclear pore complex protein Nup214 OS=Homo sapiens GN=NUP214 PE=1 SV=2	0.716563	0.000184671	0.00070588	0.00077115	0.00072994	0.00063522	0.000710548	17	22	22	20	20.25	0.0010329	0.00093962	0.0010038	0.0009901	0.000991605	53	52	51	54	52.5
LIMD1	LIM domain-containing protein 1 OS=Homo sapiens GN=LIMD1 PE=1 SV=1	0.71401	0.142167	0.00038513	0.00043349	0.00071806	0.00049098	0.000506915	3	4	7	5	4.75	0.00072305	0.00094972	0.0004868	0.00068025	0.000709955	12	17	8	12	12.25
MARS	Methionine--tRNA ligase, cytoplasmic OS=Homo sapiens GN=MARS PE=1 SV=2	0.712445	0.0859083	0.00067497	0.00056979	0.0010016	0.00044253	0.000672223	7	7	13	6	8.25	0.0010409	0.00079727	0.0009141	0.0010219	0.000943543	23	19	20	24	21.5
BAG2	BAG family molecular chaperone regulator 2 OS=Homo sapiens GN=BAG2 PE=1 SV=1	0.694409	0.0654952	0.00082258	0.0020832	0.0019719	0.0018876	0.00169132	2	6	6	6	5	0.0025096	0.0025058	0.0027293	0.0019978	0.00243563	13	14	14	11	13
RBM25	RNA-binding protein 25 OS=Homo sapiens GN=RBM25 PE=1 SV=3	0.692634	0.000377187	0.00061766	0.00060832	0.00049355	0.0005512	0.000567682	6	7	6	7	6.5	0.00086972	0.00080638	0.00082952	0.00077278	0.0008196	18	18	17	17	17.5
PSMC2	26S proteasome regulatory subunit 7 OS=Homo sapiens GN=PSMC2 PE=1 SV=3	0.691377	0.0115008	0.0014029	0.0020303	0.0014413	0.0022995	0.0017935	7	12	9	15	10.75	0.0025399	0.0026165	0.002565	0.002655	0.0025941	27	30	27	30	28.5
DBNL	Drebrin-like protein OS=Homo sapiens GN=DBNL PE=1 SV=1	0.690626	0.176442	0.00060545	0.00051111	0.0012901	0.00092623	0.000833222	3	3	8	6	5	0.0007578	0.0014052	0.0011479	0.001515	0.00120648	8	16	12	17	13.25
DPYSL2	Dihydropyrimidinase-related protein 2 OS=Homo sapiens GN=DPYSL2 PE=1 SV=1	0.689733	0.0427005	0.00060687	0.00064038	0.0010911	0.00069629	0.00075866	4	5	9	6	6	0.00092573	0.0011224	0.0010787	0.0012729	0.00109993	13	17	15	19	16
EPPK1	Epiplakin OS=Homo sapiens GN=EPPK1 PE=1 SV=2	0.688526	0.121426	6.8198e-05	5.7571e-05	8.1742e-05	2.6083e-05	5.83985e-05	4	5	6	2	4.25	6.4019e-05	8.9034e-05	8.0814e-05	0.0001054	8.48168e-05	11	13	10	15	12.25
RAN	GTP-binding nuclear protein Ran OS=Homo sapiens GN=RAN PE=1 SV=3	0.687911	0.528659	0.0016071	0	0	0.00092195	0.000632263	4	0	0	3	1.75	0.0007543	0.00052452	0.0013331	0.0010645	0.000919105	4	3	7	6	5
VARS	Valine--tRNA ligase OS=Homo sapiens GN=VARS PE=1 SV=4	0.686966	0.366451	0	0.00017387	0.0002743	0.00010503	0.0001383	0	3	5	2	2.5	0.0001289	0.0002689	0.00019526	0.00021222	0.00020132	4	9	6	7	6.5
EIF5A	Eukaryotic translation initiation factor 5A-1 OS=Homo sapiens GN=EIF5A PE=1 SV=2	0.686922	0.0192827	0.0028176	0.0028543	0.0027017	0.0021552	0.0026322	5	6	6	5	5.5	0.0042319	0.0036784	0.0029382	0.004479	0.00383188	16	15	11	18	15
HAUS6	HAUS augmin-like complex subunit 6 OS=Homo sapiens GN=HAUS6 PE=1 SV=2	0.683992	0.0268198	0.00081784	0.0006904	0.00036306	0.00069508	0.000641595	9	9	5	10	8.25	0.00093833	0.00094908	0.00086145	0.0010032	0.000938015	22	24	20	25	22.75
CCT4	T-complex protein 1 subunit delta OS=Homo sapiens GN=CCT4 PE=1 SV=4	0.678404	0.0344765	0.0043471	0.0033979	0.0034736	0.0035715	0.00369753	32	27	29	33	30.25	0.0040808	0.0066562	0.0048079	0.0062564	0.00545032	59	98	65	92	78.5
RABEP1	Rab GTPase-binding effector protein 1 OS=Homo sapiens GN=RABEP1 PE=1 SV=2	0.673377	0.386988	0	0.00033995	0.00016089	0.00023102	0.000182965	0	4	2	3	2.25	0.00023626	0.00026287	0.00014316	0.00044456	0.000271712	5	6	3	10	6
MLF2	Myeloid leukemia factor 2 OS=Homo sapiens GN=MLF2 PE=1 SV=1	0.668427	0.290521	0	0.0005908	0.00083884	0.00080298	0.000558155	0	2	3	3	2	0.00049273	0.00091368	0.0011611	0.0007726	0.000835028	3	6	7	5	5.25
PRKDC	DNA-dependent protein kinase catalytic subunit OS=Homo sapiens GN=PRKDC PE=1 SV=3	0.664544	0.0886114	0.00012614	0.00014198	0.00021838	0.00019297	0.000169867	6	8	13	12	9.75	0.00018748	0.00032935	0.00019929	0.00030634	0.000255615	19	36	20	33	27
EEF2	Elongation factor 2 OS=Homo sapiens GN=EEF2 PE=1 SV=4	0.653976	0.00961161	0.00070801	0.00111	0.00072739	0.00092839	0.000868448	7	13	9	12	10.25	0.0011868	0.0014525	0.0011986	0.0014739	0.00132795	25	33	25	33	29
MARCKS	Myristoylated alanine-rich C-kinase substrate OS=Homo sapiens GN=MARCKS PE=1 SV=4	0.649303	0.705106	0	0	0	0.00039988	9.997e-05	0	0	0	2	0.5	0.00036806	0	0.0002478	0	0.000153965	3	0	2	0	1.25
AP3D1	AP-3 complex subunit delta-1 OS=Homo sapiens GN=AP3D1 PE=1 SV=1	0.643123	0.00171537	0.00060213	0.00063538	0.00048114	0.00063329	0.000587985	8	10	8	11	9.25	0.00077719	0.00091711	0.00099893	0.00096383	0.000914265	22	28	28	29	26.75
RAVER1	Ribonucleoprotein PTB-binding 1 OS=Homo sapiens GN=RAVER1 PE=1 SV=1	0.638295	0.47491	0	0	0.00057215	0.00021908	0.000197807	0	0	5	2	1.75	0.0004705	0.00024928	0.00020364	0.00031618	0.0003099	7	4	3	5	4.75
PRKAR2A	cAMP-dependent protein kinase type II-alpha regulatory subunit OS=Homo sapiens GN=PRKAR2A PE=1 SV=2	0.63436	0.00332344	0.0015036	0.0014507	0.0020597	0.0014788	0.0016232	7	8	12	9	9	0.0023189	0.0024304	0.0025454	0.0029405	0.0025588	23	26	25	31	26.25
CCT6A	T-complex protein 1 subunit zeta OS=Homo sapiens GN=CCT6A PE=1 SV=3	0.627504	0.0198834	0.0042492	0.0042769	0.0032648	0.0041253	0.00397905	26	31	25	33	28.75	0.0053696	0.0076811	0.0048804	0.0074332	0.00634107	70	108	63	103	86
WDCP	WD repeat and coiled-coil-containing protein OS=Homo sapiens GN=WDCP PE=1 SV=1	0.62358	0.00173972	0.0018054	0.0013209	0.0018274	0.0014731	0.0016067	15	13	19	16	15.75	0.0025422	0.0028285	0.002225	0.0027106	0.00257658	45	54	39	51	47.25
EEF1E1	Eukaryotic translation elongation factor 1 epsilon-1 OS=Homo sapiens GN=EEF1E1 PE=1 SV=1	0.617795	0.35518	0.001995	0	0	0.001526	0.00088025	4	0	0	4	2	0.0014046	0.0013023	0.0018912	0.0011012	0.00142483	6	6	8	5	6.25
CCT7	T-complex protein 1 subunit eta OS=Homo sapiens GN=CCT7 PE=1 SV=2	0.61745	0.000838865	0.0051142	0.0049919	0.0049805	0.0037897	0.00471907	32	37	39	31	34.75	0.0067512	0.0079982	0.0074239	0.0083981	0.00764285	90	115	98	119	105.5
CAMK2D	Calcium/calmodulin-dependent protein kinase type II subunit delta OS=Homo sapiens GN=CAMK2D PE=1 SV=3	0.611782	0.375682	0	0	0.00027793	0.00039908	0.000169253	0	0	2	3	1.25	0.00024488	0.00037841	0.00032974	0.00015359	0.000276655	3	5	4	2	3.5
EPRS	Bifunctional glutamate/proline--tRNA ligase OS=Homo sapiens GN=EPRS PE=1 SV=5	0.600302	5.4147e-06	0.00074614	0.00077523	0.0007338	0.00074634	0.000750377	13	16	16	17	15.5	0.0012392	0.0013238	0.0011698	0.0012672	0.00125	46	53	43	50	48
MYL12B	Myosin regulatory light chain 12B OS=Homo sapiens GN=MYL12B PE=1 SV=2	0.594856	0.0675819	0.0010091	0.0012778	0.0016127	0.0034734	0.00184325	2	3	4	9	4.5	0.0033154	0.0030739	0.003109	0.0028963	0.00309865	14	14	13	13	13.5
EIF4B	Eukaryotic translation initiation factor 4B OS=Homo sapiens GN=EIF4B PE=1 SV=2	0.593235	0.0120932	0.0004261	0.0003597	0.00034048	0.00043457	0.000390212	3	3	3	4	3.25	0.00059998	0.00086533	0.00053859	0.00062718	0.00065777	9	14	8	10	10.25
AP1B1	AP-1 complex subunit beta-1 OS=Homo sapiens GN=AP1B1 PE=1 SV=2	0.588212	0.51531	0	0	0.00021921	0	5.48025e-05	0	0	3	0	0.75	8.5842e-05	0.00011938	8.669e-05	8.076e-05	9.3168e-05	5	7	4	5	5.25
DDX46	Probable ATP-dependent RNA helicase DDX46 OS=Homo sapiens GN=DDX46 PE=1 SV=2	0.585237	0.000879152	0.00042086	0.00056845	0.00060533	0.00051507	0.000527427	5	8	9	8	7.5	0.00098768	0.00087912	0.00095754	0.00078054	0.00090122	25	24	24	21	23.5
APBB1	Amyloid-beta A4 precursor protein-binding family B member 1 OS=Homo sapiens GN=APBB1 PE=1 SV=2	0.583121	0.000124801	0.0014667	0.001135	0.001172	0.0013089	0.00127065	12	11	12	14	12.25	0.0020653	0.0023404	0.0022595	0.002051	0.00217905	36	44	39	38	39.25
CSNK2A1	Casein kinase II subunit alpha OS=Homo sapiens GN=CSNK2A1 PE=1 SV=1	0.578969	0.106217	0	0.0016863	0.0015962	0.0010186	0.00107527	0	9	9	6	6	0.0015626	0.0021249	0.0016833	0.0020581	0.00185723	15	22	16	21	18.5
INPP5F	Phosphatidylinositide phosphatase SAC2 OS=Homo sapiens GN=INPP5F PE=1 SV=3	0.570843	0.55221	0	0	0	0.00017592	4.398e-05	0	0	0	3	0.75	0	0.00010009	7.2676e-05	0.00013541	7.7044e-05	0	3	2	4	2.25
HM13	Minor histocompatibility antigen H13 OS=Homo sapiens GN=HM13 PE=1 SV=1	0.564685	0.609274	0	0	0.00036787	0	9.19675e-05	0	0	2	0	0.5	0.00032413	0	0.00032733	0	0.000162865	3	0	3	0	1.5
ACLY	ATP-citrate synthase OS=Homo sapiens GN=ACLY PE=1 SV=3	0.562765	0.00557732	0.00063057	0.00073193	0.00088176	0.0010249	0.00081729	8	11	14	17	12.5	0.0011839	0.0016121	0.0013076	0.0017055	0.00145227	32	47	35	49	40.75
ACSL3	Long-chain-fatty-acid--CoA ligase 3 OS=Homo sapiens GN=ACSL3 PE=1 SV=3	0.539284	0.523125	0.00024106	0	0	0	6.0265e-05	2	0	0	0	0.5	0.00022629	0	0.00011426	0.00010645	0.00011175	4	0	2	2	2
QARS	Glutamine--tRNA ligase OS=Homo sapiens GN=QARS PE=1 SV=1	0.53876	0.00699328	0.00022395	0.00028358	0.00044738	0.00025696	0.000302967	2	3	5	3	3.25	0.00063069	0.0004873	0.00063692	0.00049446	0.000562343	12	10	12	10	11
NACA	Nascent polypeptide-associated complex subunit alpha, muscle-specific form OS=Homo sapiens GN=NACA PE=1 SV=1	0.534985	0.224005	0	0.00010576	0	9.5833e-05	5.03983e-05	0	3	0	3	1.5	9.8008e-05	0.00012722	5.9386e-05	9.2206e-05	9.4205e-05	5	7	3	5	5
AKAP12	A-kinase anchor protein 12 OS=Homo sapiens GN=AKAP12 PE=1 SV=4	0.533537	0.000765838	0.0002435	0.00024666	0.00015565	0.00026075	0.00022664	5	6	4	7	5.5	0.00038858	0.00044505	0.00039242	0.0004731	0.000424787	17	21	17	22	19.25
HDLBP	Vigilin OS=Homo sapiens GN=HDLBP PE=1 SV=2	0.533305	0.0112315	0.00041064	0.00028888	0.00060157	0.00068055	0.00049541	6	5	11	13	8.75	0.00073883	0.00098285	0.00087589	0.0011182	0.000928943	23	33	27	37	30
NSRP1	Nuclear speckle splicing regulatory protein 1 OS=Homo sapiens GN=NSRP1 PE=1 SV=1	0.529375	0.582571	0.00031105	0	0	0	7.77625e-05	2	0	0	0	0.5	0.00021899	0	0.00036859	0	0.000146895	3	0	5	0	2
VPS13C	Vacuolar protein sorting-associated protein 13C OS=Homo sapiens GN=VPS13C PE=1 SV=1	0.528441	0.0637686	0	9.7601e-05	9.2385e-05	0.0001415	8.28715e-05	0	5	5	8	4.5	0.00013024	0.00019119	0.00014249	0.00016337	0.000156822	12	19	13	16	15
CCT2	T-complex protein 1 subunit beta OS=Homo sapiens GN=CCT2 PE=1 SV=4	0.527716	1.46588e-05	0.0055151	0.0053404	0.0049254	0.0047148	0.00512392	34	39	38	38	37.25	0.0091361	0.010377	0.0092264	0.010099	0.00970962	120	147	120	141	132
DARS	Aspartate--tRNA ligase, cytoplasmic OS=Homo sapiens GN=DARS PE=1 SV=2	0.517495	2.7791e-05	0.00069287	0.0005849	0.00083047	0.00066248	0.00069268	4	4	6	5	4.75	0.0013821	0.0012815	0.0013137	0.0013768	0.00133853	17	17	16	18	17
KIAA0319L	Dyslexia-associated protein KIAA0319-like protein OS=Homo sapiens GN=KIAA0319L PE=1 SV=2	0.514985	0.0928549	0	0.00048886	0.00033053	0.00012656	0.000236488	0	7	5	2	3.5	0.00042712	0.00054002	0.00043134	0.00043837	0.000459213	11	15	11	12	12.25
PPP1CC	Serine/threonine-protein phosphatase PP1-gamma catalytic subunit OS=Homo sapiens GN=PPP1CC PE=1 SV=1	0.511641	1.06789e-05	0.001612	0.0015877	0.0015028	0.0012331	0.0014839	6	7	7	6	6.5	0.0027743	0.002923	0.0030564	0.0028474	0.00290027	22	25	24	24	23.75
NUDC	Nuclear migration protein nudC OS=Homo sapiens GN=NUDC PE=1 SV=1	0.508682	0.00018655	0.0015731	0.0015493	0.0018855	0.0020054	0.00175333	6	7	9	10	8	0.0029534	0.0037651	0.0034797	0.003589	0.0034468	24	33	28	31	29
PIH1D1	PIH1 domain-containing protein 1 OS=Homo sapiens GN=PIH1D1 PE=1 SV=1	0.499052	0.539997	0	0	0	0.00045779	0.000114448	0	0	0	2	0.5	0	0.0005209	0	0.00039642	0.00022933	0	4	0	3	1.75
RPL29	60S ribosomal protein L29 OS=Homo sapiens GN=RPL29 PE=1 SV=2	0.498333	0.441615	0	0	0	0.0012525	0.000313125	0	0	0	3	0.75	0.0010247	0.00071256	0.00077612	0	0.000628345	4	3	3	0	2.5
HNRNPU	Heterogeneous nuclear ribonucleoprotein U OS=Homo sapiens GN=HNRNPU PE=1 SV=6	0.493453	0.00171363	0.00042076	0.000444	0.00025216	0.00032184	0.00035969	4	5	3	4	4	0.00059247	0.00073242	0.00084762	0.00074319	0.000728925	12	16	17	16	15.25
CAPZB	F-actin-capping protein subunit beta OS=Homo sapiens GN=CAPZB PE=1 SV=4	0.486519	0.050024	0.00062658	0.00052895	0	0.0011982	0.000588433	2	2	0	5	2.25	0.0010293	0.001227	0.0013365	0.0012451	0.00120948	7	9	9	9	8.5
HNRNPF	Heterogeneous nuclear ribonucleoprotein F OS=Homo sapiens GN=HNRNPF PE=1 SV=3	0.486088	0.0304687	0.00083645	0.00070611	0.00066838	0	0.000552735	4	4	4	0	3	0.00088334	0.001183	0.0011894	0.0012927	0.00113711	9	13	12	14	12
PSMC5	26S proteasome regulatory subunit 8 OS=Homo sapiens GN=PSMC5 PE=1 SV=1	0.476552	0.00675023	0.0004275	0.0010827	0.0010248	0.00065399	0.000797248	2	6	6	4	4.5	0.0014046	0.0014883	0.0017224	0.0020765	0.00167295	14	16	17	22	17.25
RPS25	40S ribosomal protein S25 OS=Homo sapiens GN=RPS25 PE=1 SV=1	0.472529	0.208937	0.0013885	0.0011721	0	0	0.00064015	2	2	0	0	1	0.002281	0.0012085	0.0013163	0.00061313	0.00135473	7	4	4	2	4.25
CORO1C	Coronin-1C OS=Homo sapiens GN=CORO1C PE=1 SV=1	0.461278	0.0974794	0	0	0.00043889	0.00056017	0.000249765	0	0	3	4	1.75	0.00051559	0.00055772	0.00060747	0.00048507	0.000541463	6	7	7	6	6.5
AGFG1	Arf-GAP domain and FG repeat-containing protein 1 OS=Homo sapiens GN=AGFG1 PE=1 SV=2	0.460996	0.470126	0	0	0	0.00035434	8.8585e-05	0	0	0	3	0.75	0.00014495	0	0.00014639	0.0004773	0.00019216	2	0	2	7	2.75
ZFYVE16	Zinc finger FYVE domain-containing protein 16 OS=Homo sapiens GN=ZFYVE16 PE=1 SV=3	0.459873	0.000271175	0.00033833	0.00052362	0.00058575	0.00047445	0.000480538	6	11	13	11	10.25	0.00097926	0.00093248	0.0011226	0.0011454	0.00104493	37	38	42	46	40.75
ARHGAP29	Rho GTPase-activating protein 29 OS=Homo sapiens GN=ARHGAP29 PE=1 SV=2	0.454846	0.502479	0	0	0.00010998	0	2.7495e-05	0	0	2	0	0.5	0	8.9846e-05	0	0.00015195	6.0449e-05	0	3	0	5	2
HAUS4	HAUS augmin-like complex subunit 4 OS=Homo sapiens GN=HAUS4 PE=1 SV=1	0.454256	0.00259035	0.00047814	0.00040363	0.00038206	0.00036573	0.00040739	2	2	2	2	2	0.00067326	0.00093633	0.0011332	0.00084453	0.00089683	6	9	10	8	8.25
ESYT1	Extended synaptotagmin-1 OS=Homo sapiens GN=ESYT1 PE=1 SV=1	0.450966	6.00545e-05	0.00078607	0.00099537	0.001005	0.00078165	0.000892023	10	15	16	13	13.5	0.002103	0.0019498	0.0021238	0.0017355	0.00197802	57	57	57	50	55.25
FAM114A2	Protein FAM114A2 OS=Homo sapiens GN=FAM114A2 PE=1 SV=4	0.448607	0.00771525	0.0010311	0.0004352	0.00041195	0.0010516	0.000732463	6	3	3	8	5	0.0012905	0.00172	0.0015476	0.0019729	0.00163275	16	23	19	26	21
ABCE1	ATP-binding cassette sub-family E member 1 OS=Homo sapiens GN=ABCE1 PE=1 SV=1	0.448518	0.12024	0	0	0.00023153	0.00044327	0.0001687	0	0	2	4	1.5	0.000272	0.00044133	0.00034336	0.00044782	0.000376127	4	7	5	7	5.75
LYPLA2	Acyl-protein thioesterase 2 OS=Homo sapiens GN=LYPLA2 PE=1 SV=1	0.443533	0.366734	0	0	0.00060038	0	0.000150095	0	0	2	0	0.5	0.00052899	0.00032697	0	0.00049767	0.000338407	3	2	0	3	2
TUBB6	Tubulin beta-6 chain OS=Homo sapiens GN=TUBB6 PE=1 SV=1	0.434213	0.2608	0.00038916	0.00032852	0	0	0.00017942	10	19	0	0	7.25	0	0.00076208	0.00046115	0.0004296	0.000413208	0	45	26	38	27.25
CSNK1A1	Casein kinase I isoform alpha OS=Homo sapiens GN=CSNK1A1 PE=1 SV=2	0.43291	0.0137399	0.00051503	0.00086955	0	0.00059092	0.000493875	2	4	0	3	2.25	0.0012087	0.0012327	0.0010985	0.0010234	0.00114083	10	11	9	9	9.75
TJP2	Tight junction protein ZO-2 OS=Homo sapiens GN=TJP2 PE=1 SV=2	0.423364	5.95977e-05	0.00021878	0.00043094	0.00034963	0.00033469	0.00033351	3	7	6	6	5.5	0.00082149	0.00076166	0.00079504	0.00077286	0.000787762	24	24	23	24	23.75
PRRC2C	Protein PRRC2C OS=Homo sapiens GN=PRRC2C PE=1 SV=4	0.417508	2.45816e-05	0.00014983	0.00015178	9.5779e-05	0.00011461	0.000128	5	6	4	5	5	0.00029536	0.00029993	0.00032669	0.00030434	0.00030658	21	23	23	23	22.5
VIM	Vimentin OS=Homo sapiens GN=VIM PE=1 SV=4	0.417329	0.0104971	0.0027934	0.0026726	0.0032738	0.0021367	0.00271913	15	17	22	15	17.25	0.0084785	0.0047815	0.0080327	0.0047695	0.00651555	97	59	91	58	76.25
CD2AP	CD2-associated protein OS=Homo sapiens GN=CD2AP PE=1 SV=1	0.416563	3.67354e-05	0.00040743	0.00045859	0.0005426	0.00062329	0.000507978	3	4	5	6	4.5	0.0013386	0.0012411	0.0011587	0.0011394	0.00121945	21	21	18	19	19.75
H3F3A	Histone H3.3 OS=Homo sapiens GN=H3F3A PE=1 SV=2	0.41401	0.215495	0.0019143	0	0	0	0.000478575	3	0	0	0	0.75	0.0008985	0.0013884	0.0012098	0.0011271	0.00115595	3	5	4	4	4
SEC16A	Protein transport protein Sec16A OS=Homo sapiens GN=SEC16A PE=1 SV=3	0.412724	1.61645e-05	0.00031861	0.00047069	0.00038189	0.00048742	0.000414653	8	14	12	16	12.5	0.00097203	0.0010399	0.0010571	0.00094966	0.00100467	52	60	56	54	55.5
HAUS3	HAUS augmin-like complex subunit 3 OS=Homo sapiens GN=HAUS3 PE=1 SV=1	0.412386	0.00493573	0.00028783	0.00048597	0.00023	0.0006605	0.000416075	2	4	2	6	3.5	0.0010132	0.0010647	0.00075038	0.0012075	0.00100895	15	17	11	19	15.5
DPYSL3	Dihydropyrimidinase-related protein 3 OS=Homo sapiens GN=DPYSL3 PE=1 SV=1	0.408805	0.0312684	0.0003045	0	0.00024331	0.00034937	0.000224295	2	0	5	5	3	0.00042876	0.00079506	0.00043299	0.00053783	0.00054866	9	15	7	11	10.5
SALL2	Sal-like protein 2 OS=Homo sapiens GN=SALL2 PE=1 SV=4	0.407966	0.0075463	0.00017236	0	0.00020659	0.00013184	0.000127698	2	0	3	2	1.75	0.00032359	0.00030002	0.00028594	0.00034249	0.00031301	8	8	7	9	8
EPS15L1	Epidermal growth factor receptor substrate 15-like 1 OS=Homo sapiens GN=EPS15L1 PE=1 SV=1	0.401932	0.00667103	0.00030133	0	0.0004013	0.00030732	0.000252487	3	0	5	4	3	0.00056572	0.00061194	0.00071414	0.00062094	0.000628185	12	14	15	14	13.75
GAPVD1	GTPase-activating protein and VPS9 domain-containing protein 1 OS=Homo sapiens GN=GAPVD1 PE=1 SV=2	0.4018	0.000642704	0.00035229	0.0001487	0.00028151	0.00022456	0.000251765	6	3	6	5	5	0.00071653	0.00063879	0.00052879	0.00062226	0.000626592	26	25	19	24	23.5
RPS23	40S ribosomal protein S23 OS=Homo sapiens GN=RPS23 PE=1 SV=3	0.398157	0.0401086	0	0.0010246	0.0014548	0.0013926	0.000968	0	2	3	3	2	0.0037029	0.0021128	0.0023012	0.0016079	0.0024312	13	8	8	6	8.75
HAUS1	HAUS augmin-like complex subunit 1 OS=Homo sapiens GN=HAUS1 PE=1 SV=1	0.397225	0.0355461	0.00062433	0	0.00049888	0.00071633	0.000459885	2	0	2	3	1.75	0.00073259	0.0014943	0.00088779	0.0015163	0.00115774	5	11	6	11	8.25
RAPGEF6	Rap guanine nucleotide exchange factor 6 OS=Homo sapiens GN=RAPGEF6 PE=1 SV=2	0.396648	0.00437137	0.00027102	0.00022879	8.6626e-05	0.00024877	0.000208802	5	5	2	6	4.5	0.00053427	0.0006133	0.0003597	0.00059839	0.000526415	21	26	14	25	21.5
BCR	Breakpoint cluster region protein OS=Homo sapiens GN=BCR PE=1 SV=2	0.394587	7.13397e-05	0.00040967	0.00034583	0.00032735	0.00041781	0.000375165	6	6	6	8	6.5	0.00092937	0.0010697	0.0008091	0.00099495	0.00095078	29	36	25	33	30.75
DNAJB1	DnaJ homolog subfamily B member 1 OS=Homo sapiens GN=DNAJB1 PE=1 SV=4	0.392325	0.000722453	0.00076572	0.00064641	0.00061186	0.00078094	0.000701233	3	3	3	4	3.25	0.0014376	0.0021104	0.0015728	0.0020287	0.00178737	12	19	13	18	15.5
PPP6R1	Serine/threonine-protein phosphatase 6 regulatory subunit 1 OS=Homo sapiens GN=PPP6R1 PE=1 SV=5	0.38638	0.0513865	0.00019701	0.00024946	0	0	0.000111618	2	3	0	0	1.25	0.00023117	0.00034293	0.00023345	0.00034797	0.00028888	5	8	5	8	6.5
XPO5	Exportin-5 OS=Homo sapiens GN=XPO5 PE=1 SV=1	0.380853	0.335582	0	0	0	0.00011027	2.75675e-05	0	0	0	2	0.5	6.7661e-05	6.2733e-05	0	0.00015914	7.23835e-05	2	2	0	5	2.25
HADHA	Trifunctional enzyme subunit alpha, mitochondrial OS=Homo sapiens GN=HADHA PE=1 SV=2	0.377093	0.432213	0	0	0.00018177	0	4.54425e-05	0	0	2	0	0.5	0.0003203	0	0.00016173	0	0.000120507	6	0	3	0	2.25
ESYT2	Extended synaptotagmin-2 OS=Homo sapiens GN=ESYT2 PE=1 SV=1	0.373843	0.0783737	0.00018845	0	0.00022588	0	0.000103582	2	0	3	0	1.25	0.00035381	0.00024603	0.00013399	0.00037447	0.000277075	8	6	3	9	6.5
EIF4E	Eukaryotic translation initiation factor 4E OS=Homo sapiens GN=EIF4E PE=1 SV=2	0.371836	0.161392	0	0	0	0.0006118	0.00015295	0	0	0	2	0.5	0.00037541	0.00034807	0.00056868	0.00035319	0.000411338	2	2	3	2	2.25
ELP4	Elongator complex protein 4 OS=Homo sapiens GN=ELP4 PE=1 SV=2	0.367316	0.253696	0	0.00034556	0	0	8.639e-05	0	2	0	0	0.5	0.0002882	0	0.00029105	0.00036152	0.000235193	3	0	3	4	2.5
KPNB1	Importin subunit beta-1 OS=Homo sapiens GN=KPNB1 PE=1 SV=2	0.367041	6.04786e-05	0.0005944	0.00041815	0.00071244	0.00083354	0.000639632	6	5	9	11	7.75	0.0018599	0.0017676	0.0015496	0.0017936	0.00174268	40	41	33	41	38.75
RPAP3	RNA polymerase II-associated protein 3 OS=Homo sapiens GN=RPAP3 PE=1 SV=2	0.365902	0.0264935	0.000261	0.00022033	0.00020855	0.00029946	0.000247335	2	2	2	3	2.25	0.00055126	0.00062469	0.00043299	0.0010949	0.00067596	9	11	7	19	11.5
PSMC4	26S proteasome regulatory subunit 6B OS=Homo sapiens GN=PSMC4 PE=1 SV=2	0.360529	0.00412698	0	0.00087631	0.00099537	0.00047641	0.000587023	0	5	6	3	3.5	0.0016566	0.0017166	0.0016729	0.0014668	0.00162822	17	19	17	16	17.25
PCNP	PEST proteolytic signal-containing nuclear protein OS=Homo sapiens GN=PCNP PE=1 SV=2	0.359023	0.00956462	0	0.00082314	0.00077915	0.0014917	0.000773498	0	2	2	4	2	0.0016018	0.0021217	0.0023109	0.0025834	0.00215445	7	10	10	12	9.75
TTC28	Tetratricopeptide repeat protein 28 OS=Homo sapiens GN=TTC28 PE=1 SV=4	0.356308	0.124534	0	8.8584e-05	8.385e-05	0	4.31085e-05	0	3	3	0	1.5	8.2088e-05	0.00021311	4.9739e-05	0.00013901	0.000120987	5	14	3	9	7.75
IARS	Isoleucine--tRNA ligase, cytoplasmic OS=Homo sapiens GN=IARS PE=1 SV=2	0.355083	0.000293145	0.0002063	0.00017415	0.00032969	0.00042079	0.000282733	3	3	6	8	5	0.00083917	0.00074813	0.00071708	0.00088059	0.000796243	26	25	22	29	25.5
RPL30	60S ribosomal protein L30 OS=Homo sapiens GN=RPL30 PE=1 SV=2	0.351271	0.00628677	0.0015092	0	0.001206	0.0011544	0.0009674	2	0	2	2	1.5	0.0024793	0.0026272	0.0035769	0.0023326	0.002754	7	8	10	7	8
SPAG5	Sperm-associated antigen 5 OS=Homo sapiens GN=SPAG5 PE=1 SV=2	0.349334	0.00111052	0.00021823	0.00012282	0.00034876	0.00033385	0.000255915	3	2	6	6	4.25	0.00075113	0.00088636	0.00058616	0.00070667	0.00073258	22	28	17	22	22.25
DNAJA2	DnaJ homolog subfamily A member 2 OS=Homo sapiens GN=DNAJA2 PE=1 SV=1	0.336057	0.0226926	0	0.00035563	0	0.00032223	0.000169465	0	2	0	2	1	0.00059318	0.00036665	0.0004992	0.00055807	0.000504275	6	4	5	6	5.25
SRSF11	Serine/arginine-rich splicing factor 11 OS=Homo sapiens GN=SRSF11 PE=1 SV=1	0.327164	0.0459337	0.0003586	0.00030272	0	0	0.00016533	2	2	0	0	1	0.0005891	0.00070225	0.00025497	0.00047505	0.000505342	7	9	3	6	6.25
GOLGA5	Golgin subfamily A member 5 OS=Homo sapiens GN=GOLGA5 PE=1 SV=3	0.325212	0.0477121	0	0	0.00018972	0.00018161	9.28325e-05	0	0	2	2	1	0.00022288	0.00020665	0.00045017	0.00026211	0.000285453	4	4	8	5	5.25
PSMD2	26S proteasome non-ATPase regulatory subunit 2 OS=Homo sapiens GN=PSMD2 PE=1 SV=3	0.32517	1.70259e-06	0.00047787	0.00040341	0.00061096	0.00058485	0.000519273	5	5	8	8	6.5	0.0015701	0.0016221	0.0016762	0.0015193	0.00159692	35	39	37	36	36.75
SNRPD3	Small nuclear ribonucleoprotein Sm D3 OS=Homo sapiens GN=SNRPD3 PE=1 SV=1	0.321693	0.202664	0	0	0.0011007	0	0.000275175	0	0	2	0	0.5	0	0.00089918	0.0013059	0.0012165	0.000855395	0	3	4	4	2.75
CAMSAP3	Calmodulin-regulated spectrin-associated protein 3 OS=Homo sapiens GN=CAMSAP3 PE=1 SV=2	0.319211	0.0574204	0	0.00011731	0.00011104	0.00015944	9.69475e-05	0	2	2	3	1.75	0.00016306	0.0003326	0.0001976	0.00052158	0.00030371	5	11	6	17	9.75
IFT22	Intraflagellar transport protein 22 homolog OS=Homo sapiens GN=IFT22 PE=1 SV=1	0.317461	0.342558	0	0	0	0.00071762	0.000179405	0	0	0	2	0.5	0	0.0012248	0	0.0010357	0.000565125	0	6	0	5	2.75
TBC1D15	TBC1 domain family member 15 OS=Homo sapiens GN=TBC1D15 PE=1 SV=2	0.302086	2.52414e-06	0.00025118	0.00021204	0.00030106	0.00028819	0.000263118	2	2	3	3	2.5	0.00082525	0.00087445	0.00095246	0.00083185	0.000871003	14	16	16	15	15.25
TES	Testin OS=Homo sapiens GN=TES PE=1 SV=1	0.300004	0.0839287	0	0	0	0.00047302	0.000118255	0	0	0	3	0.75	0.00029025	0.00053822	0.00029312	0.00045512	0.000394178	3	6	3	5	4.25
DIAPH1	Protein diaphanous homolog 1 OS=Homo sapiens GN=DIAPH1 PE=1 SV=2	0.297563	0.00113294	0	0.00023038	0.00021806	0.00010437	0.000138203	0	4	4	2	2.5	0.00048033	0.00047504	0.0004204	0.00048202	0.000464447	15	16	13	16	15
MAP1B	Microtubule-associated protein 1B OS=Homo sapiens GN=MAP1B PE=1 SV=2	0.297266	0.00018603	0.00066809	0.0003562	0.00059004	0.00048413	0.000524615	19	12	21	18	17.5	0.0015844	0.0020505	0.0014834	0.0019409	0.0017648	96	134	89	125	111
GID8	Glucose-induced degradation protein 8 homolog OS=Homo sapiens GN=GID8 PE=1 SV=1	0.295515	0.00167018	0	0.00064263	0.0012166	0.0011646	0.000755957	0	2	4	4	2.5	0.003037	0.0024846	0.0025258	0.002185	0.0025581	17	15	14	13	14.75
LARS	Leucine--tRNA ligase, cytoplasmic OS=Homo sapiens GN=LARS PE=1 SV=2	0.295131	0.0127754	0	0.00024918	0.0001769	0	0.00010652	0	4	3	0	1.75	0.00045027	0.00038536	0.0003148	0.00029327	0.000360925	13	12	9	9	10.75
PRDX6	Peroxiredoxin-6 OS=Homo sapiens GN=PRDX6 PE=1 SV=3	0.28438	1.4305e-05	0.00077484	0.0006541	0.00092872	0.00088902	0.00081167	2	2	3	3	2.5	0.0025457	0.0028661	0.0027545	0.0032504	0.00285418	14	17	15	19	16.25
EIF3B	Eukaryotic translation initiation factor 3 subunit B OS=Homo sapiens GN=EIF3B PE=1 SV=3	0.283304	7.80931e-05	0.00042645	0.00027	0.00025557	0.00024464	0.000299165	4	3	3	3	3.25	0.001251	0.0010207	0.0010107	0.00094154	0.00105598	25	22	20	20	21.75
EIF2S3	Eukaryotic translation initiation factor 2 subunit 3 OS=Homo sapiens GN=EIF2S3 PE=1 SV=3	0.279488	0.000434985	0.00036772	0.00031042	0	0.00028127	0.000239853	2	2	0	2	1.5	0.00094926	0.00080011	0.00087149	0.00081188	0.000858185	11	10	10	10	10.25
RBM27	RNA-binding protein 27 OS=Homo sapiens GN=RBM27 PE=1 SV=2	0.27537	3.88882e-05	0.00024561	0.00020734	0.00019626	0.00018787	0.00020927	3	3	3	3	3	0.00076853	0.00085507	0.0006209	0.00079534	0.00075996	20	24	16	22	20.5
RPL6	60S ribosomal protein L6 OS=Homo sapiens GN=RPL6 PE=1 SV=3	0.274142	0.000330634	0.0015066	0.00076312	0.00096311	0.00069146	0.000981073	5	3	4	3	3.75	0.0038186	0.0028849	0.0042848	0.0033265	0.0035787	27	22	30	25	26
PRKACA	cAMP-dependent protein kinase catalytic subunit alpha OS=Homo sapiens GN=PRKACA PE=1 SV=2	0.274018	0.000367575	0.00049448	0.00041743	0	0.00056735	0.000369815	2	2	0	3	1.75	0.0013925	0.0013987	0.0014063	0.0012009	0.0013496	12	13	12	11	12
GBF1	Golgi-specific brefeldin A-resistance guanine nucleotide exchange factor 1 OS=Homo sapiens GN=GBF1 PE=1 SV=2	0.273644	0.000968531	0	7.8816e-05	0.00018651	0.00010712	9.31115e-05	0	2	5	3	2.5	0.00037248	0.00030472	0.00035404	0.00032982	0.000340265	17	15	16	16	16
IFT46	Intraflagellar transport protein 46 homolog OS=Homo sapiens GN=IFT46 PE=1 SV=1	0.255027	0.0737444	0	0	0	0.00065507	0.000163768	0	0	0	3	0.75	0.00026797	0.00099383	0.00067655	0.00063028	0.000642158	2	8	5	5	5
PTPN14	Tyrosine-protein phosphatase non-receptor type 14 OS=Homo sapiens GN=PTPN14 PE=1 SV=2	0.252669	0.067639	0	0	0	0.00016777	4.19425e-05	0	0	0	3	0.75	6.863e-05	0.00015908	0.00024258	0.0001937	0.000165997	2	5	7	6	5
RPL27A	60S ribosomal protein L27a OS=Homo sapiens GN=RPL27A PE=1 SV=2	0.252437	0.0379785	0	0	0.00093708	0	0.00023427	0	0	2	0	0.5	0.00082565	0.0012759	0.00083381	0.00077677	0.000928032	3	5	3	3	3.5
RANGAP1	Ran GTPase-activating protein 1 OS=Homo sapiens GN=RANGAP1 PE=1 SV=1	0.250114	2.35194e-07	0.00088704	0.001248	0.0014176	0.0010178	0.00114261	6	10	12	9	9.25	0.0046491	0.0044392	0.0044848	0.0047003	0.00456835	67	69	64	72	68
FAM83H	Protein FAM83H OS=Homo sapiens GN=FAM83H PE=1 SV=3	0.241714	0.000152685	0.00014721	0.00012427	0.00011763	0.00039411	0.000195805	2	2	2	7	3.25	0.00072551	0.00086486	0.00083734	0.00081257	0.00081007	21	27	24	25	24.25
EPS15	Epidermal growth factor receptor substrate 15 OS=Homo sapiens GN=EPS15 PE=1 SV=2	0.240836	0.000537558	0	0.00024529	0.00038697	0.00037042	0.00025067	0	3	5	5	3.25	0.00086374	0.001138	0.00096409	0.0011975	0.00104083	19	27	21	28	23.75
FBL	rRNA 2'-O-methyltransferase fibrillarin OS=Homo sapiens GN=FBL PE=1 SV=2	0.240745	0.000186771	0.0005407	0	0.00043205	0.00041358	0.000346582	2	0	2	2	1.5	0.0013958	0.0015294	0.0012814	0.0015519	0.00143963	11	13	10	13	11.75
NUP107	Nuclear pore complex protein Nup107 OS=Homo sapiens GN=NUP107 PE=1 SV=1	0.237246	0.00332451	0	0.0001584	0.0002249	0	9.5825e-05	0	2	3	0	1.25	0.00044035	0.00040827	0.00031129	0.00045571	0.000403905	10	10	7	11	9.5
SPAG9	C-Jun-amino-terminal kinase-interacting protein 4 OS=Homo sapiens GN=SPAG9 PE=1 SV=4	0.234425	8.03938e-05	0	0.00016637	0.00015748	0.000201	0.000131212	0	3	3	4	2.5	0.00055502	0.00054318	0.0005605	0.00058018	0.00055972	18	19	18	20	18.75
HNRNPM	Heterogeneous nuclear ribonucleoprotein M OS=Homo sapiens GN=HNRNPM PE=1 SV=3	0.232074	5.07435e-05	0.00023776	0.00040142	0.00056995	0.00036373	0.000393215	2	4	6	4	4	0.0018413	0.0013968	0.0018595	0.0016798	0.00169435	33	27	33	32	31.25
AKAP1	A-kinase anchor protein 1, mitochondrial OS=Homo sapiens GN=AKAP1 PE=1 SV=1	0.231662	0.000994973	0	0.00032452	0.00023038	0.00014702	0.00017548	0	4	3	2	2.25	0.00081193	0.00058551	0.00091106	0.00072143	0.000757482	18	14	20	17	17.25
TCOF1	Treacle protein OS=Homo sapiens GN=TCOF1 PE=1 SV=3	0.231074	6.81365e-05	0.00023328	0.00024617	0.00018641	0.00013383	0.000199923	4	5	4	3	4	0.00073909	0.0010406	0.00085697	0.0008241	0.00086519	27	41	31	32	32.75
CAP1	Adenylyl cyclase-associated protein 1 OS=Homo sapiens GN=CAP1 PE=1 SV=5	0.229035	0.00233164	0	0.00030846	0.00058395	0	0.000223102	0	2	4	0	1.5	0.00094327	0.0011131	0.00095259	0.00088743	0.000974098	11	14	11	11	11.75
HAUS7	HAUS augmin-like complex subunit 7 OS=Homo sapiens GN=HAUS7 PE=1 SV=3	0.219562	0.0252371	0	0	0.00037687	0	9.42175e-05	0	0	2	0	0.5	0.00033205	0.00051312	0.00055889	0.0003124	0.000429115	3	5	5	3	4
RARS	Arginine--tRNA ligase, cytoplasmic OS=Homo sapiens GN=RARS PE=1 SV=2	0.217736	0.00141666	0	0.000333	0.00021013	0.0004023	0.000236357	0	3	2	4	2.25	0.00092573	0.00103	0.00093487	0.0014515	0.00108552	15	18	15	25	18.25
MAP3K7	Mitogen-activated protein kinase kinase kinase 7 OS=Homo sapiens GN=MAP3K7 PE=1 SV=1	0.216361	0.00128628	0	0	0.00034329	0.00065723	0.00025013	0	0	3	6	2.25	0.0011426	0.0011217	0.0012218	0.0011382	0.00115607	17	18	18	18	17.75
MAP4	Microtubule-associated protein 4 OS=Homo sapiens GN=MAP4 PE=1 SV=3	0.215399	1.97129e-05	0.00022599	0.00038156	0.00030097	0.00023049	0.000284752	3	6	5	4	4.5	0.0013082	0.0014424	0.0011069	0.0014304	0.00132197	37	44	31	43	38.75
ATP6V1A	V-type proton ATPase catalytic subunit A OS=Homo sapiens GN=ATP6V1A PE=1 SV=2	0.210129	0.00962703	0	0	0	0.00021517	5.37925e-05	0	0	0	2	0.5	0.00026406	0.00024483	0.00026667	0.00024843	0.000255998	4	4	4	4	4
DDX3X	ATP-dependent RNA helicase DDX3X OS=Homo sapiens GN=DDX3X PE=1 SV=3	0.208228	5.2772e-07	0.00026218	0.00022133	0.0002095	0.00030082	0.000248458	2	2	2	3	2.25	0.0012306	0.0010839	0.0012427	0.0012156	0.0011932	20	19	20	21	20
RANBP9	Ran-binding protein 9 OS=Homo sapiens GN=RANBP9 PE=1 SV=1	0.20767	6.31634e-05	0.00023808	0	0.00028537	0.00036423	0.00022192	2	0	3	4	2.25	0.0010616	0.00098428	0.0010721	0.0011565	0.00106862	19	19	19	22	19.75
EIF3A	Eukaryotic translation initiation factor 3 subunit A OS=Homo sapiens GN=EIF3A PE=1 SV=1	0.20651	1.55448e-05	0.00018838	0.00021204	0.00015053	0.0001441	0.000173763	3	4	3	3	3.25	0.00091367	0.00076515	0.00074411	0.00094277	0.000841425	31	28	25	34	29.5
RPS24	40S ribosomal protein S24 OS=Homo sapiens GN=RPS24 PE=1 SV=1	0.206459	0.0119013	0	0	0.0020855	0	0.000521375	0	0	4	0	1	0.0021438	0.0022716	0.0030928	0.0025931	0.00252533	7	8	10	9	8.5
EIF3E	Eukaryotic translation initiation factor 3 subunit E OS=Homo sapiens GN=EIF3E PE=1 SV=1	0.201912	0.00109638	0	0.00065851	0.00046749	0	0.0002815	0	4	3	0	1.75	0.0014645	0.0016125	0.0012941	0.0012056	0.00139418	16	19	14	14	15.75
EEF1D	Elongation factor 1-delta OS=Homo sapiens GN=EEF1D PE=1 SV=5	0.198947	0.0158456	0	0	0	0.00047246	0.000118115	0	0	0	2	0.5	0.00057981	0.00053759	0.00043916	0.00081824	0.0005937	4	4	3	6	4.25
UNC45A	Protein unc-45 homolog A OS=Homo sapiens GN=UNC45A PE=1 SV=1	0.198906	0.047834	0	0	0	0.00014064	3.516e-05	0	0	0	2	0.5	0.00021574	0.00012002	8.7149e-05	0.00028416	0.000176767	5	3	2	7	4.25
COPS3	COP9 signalosome complex subunit 3 OS=Homo sapiens GN=COPS3 PE=1 SV=3	0.198	0.073947	0	0	0.00032787	0	8.19675e-05	0	0	2	0	0.5	0.00028888	0.00080352	0.00029173	0.00027178	0.000413978	3	9	3	3	4.5
CALM1	Calmodulin-1 OS=Homo sapiens GN=CALM1 PE=1 SV=1	0.196419	0.0144573	0	0	0	0.00089101	0.000222753	0	0	0	2	0.5	0.0013668	0.00076038	0.0013804	0.0010287	0.00113407	5	3	5	4	4.25
SEC13	Protein SEC13 homolog OS=Homo sapiens GN=SEC13 PE=1 SV=3	0.187533	0.0088424	0	0	0	0.0010307	0.000257675	0	0	0	5	1.25	0.001012	0.001642	0.001533	0.0013091	0.00137403	8	14	12	11	11.25
CAPZA1	F-actin-capping protein subunit alpha-1 OS=Homo sapiens GN=CAPZA1 PE=1 SV=3	0.18437	0.0529115	0	0	0	0.00069629	0.000174073	0	0	0	3	0.75	0.00085452	0.00066023	0.0017259	0.00053595	0.00094415	6	5	12	4	6.75
HCFC1	Host cell factor 1 OS=Homo sapiens GN=HCFC1 PE=1 SV=2	0.180819	1.72309e-07	0.00012793	0.000108	0.0001363	9.7858e-05	0.000117522	3	3	4	3	3.25	0.00070055	0.00063097	0.00064683	0.00062142	0.000649943	35	34	32	33	33.5
WASHC2A	WASH complex subunit 2A OS=Homo sapiens GN=WASHC2A PE=1 SV=3	0.173358	4.99587e-05	0.00025886	0.00016389	0.00025855	0.0002475	0.0002322	4	3	5	5	4.25	0.0011542	0.0016334	0.001227	0.0013431	0.00133942	38	58	40	47	45.75
CCAR2	Cell cycle and apoptosis regulator protein 2 OS=Homo sapiens GN=CCAR2 PE=1 SV=2	0.171997	9.08489e-07	0.00028206	0.00031748	0.00015026	0.00028767	0.000259367	3	4	2	4	3.25	0.0014563	0.0014321	0.0016489	0.0014946	0.00150797	33	35	37	36	35.25
PSMC1	26S proteasome regulatory subunit 4 OS=Homo sapiens GN=PSMC1 PE=1 SV=1	0.171313	0.000742334	0	0.0004995	0	0.00060345	0.000275738	0	4	0	4	2	0.0018515	0.0017166	0.0012153	0.0016548	0.00160955	23	20	16	21	20
TTK	Dual specificity protein kinase TTK OS=Homo sapiens GN=TTK PE=1 SV=2	0.169371	0.0103065	0	0	0	0.00015491	3.87275e-05	0	0	0	2	0.5	0.00014259	0.00030847	0.00023999	0.00022357	0.000228655	3	7	5	5	5
RBBP7	Histone-binding protein RBBP7 OS=Homo sapiens GN=RBBP7 PE=1 SV=1	0.168136	0.000175172	0	0	0.00032633	0.00031238	0.000159678	0	0	2	2	1	0.0009584	0.00097746	0.00087108	0.00099183	0.000949692	10	11	9	11	10.25
RIOK1	Serine/threonine-protein kinase RIO1 OS=Homo sapiens GN=RIOK1 PE=1 SV=2	0.167675	0.00450202	0	0	0.00024417	0	6.10425e-05	0	0	2	0	0.5	0.00043027	0.00039893	0.00028968	0.00033733	0.000364053	6	6	4	5	5.25
EIF3C	Eukaryotic translation initiation factor 3 subunit C OS=Homo sapiens GN=EIF3C PE=1 SV=1	0.165786	0.00043469	0.00028515	0.00016048	0	0	0.000111408	3	2	0	0	1.25	0.00075843	0.0005791	0.00072087	0.00062958	0.000671995	17	14	16	15	15.5
PABPC1	Polyadenylate-binding protein 1 OS=Homo sapiens GN=PABPC1 PE=1 SV=2	0.162539	6.46349e-05	0	0.00023038	0.00021806	0.00020874	0.000164295	0	2	2	2	1.5	0.0011528	0.00083131	0.0010348	0.0010243	0.0010108	18	14	16	17	16.25
RPL4	60S ribosomal protein L4 OS=Homo sapiens GN=RPL4 PE=1 SV=5	0.157144	3.82251e-05	0.00040647	0.00034314	0.0003248	0.00031091	0.00034633	2	2	2	2	2	0.0025756	0.0018573	0.0024083	0.0019744	0.0022039	27	21	25	22	23.75
U2SURP	U2 snRNP-associated SURP motif-containing protein OS=Homo sapiens GN=U2SURP PE=1 SV=2	0.154674	0.000514794	0.00025301	0.00014239	0	0	9.885e-05	3	2	0	0	1.25	0.00051459	0.00069732	0.00059963	0.00074481	0.000639087	13	19	15	20	16.75
RANBP2	E3 SUMO-protein ligase RanBP2 OS=Homo sapiens GN=RANBP2 PE=1 SV=2	0.154112	1.35482e-07	0.00026917	0.00027268	0.00032263	0.00024707	0.000277887	10	12	15	12	12.25	0.0018193	0.0016517	0.0018755	0.0018661	0.00180315	144	141	147	157	147.25
CRYBG3	Very large A-kinase anchor protein OS=Homo sapiens GN=CRYBG3 PE=1 SV=3	0.152285	0.00011929	8.7658e-05	0.000222	0.00021013	0.00029055	0.000202584	3	9	9	13	8.5	0.0010834	0.0015132	0.0011634	0.0015612	0.0013303	79	119	84	121	100.75
IST1	IST1 homolog OS=Homo sapiens GN=IST1 PE=1 SV=1	0.151413	0.00393424	0	0	0.00057152	0	0.00014288	0	0	3	0	0.75	0.00078331	0.001245	0.00090405	0.00084221	0.000943643	7	12	8	8	8.75
PHB2	Prohibitin-2 OS=Homo sapiens GN=PHB2 PE=1 SV=2	0.150224	0.0396097	0	0	0	0.00044401	0.000111002	0	0	0	2	0.5	0.0010898	0.00025261	0.0011006	0.00051265	0.000738915	8	2	8	4	5.5
COPS4	COP9 signalosome complex subunit 4 OS=Homo sapiens GN=COPS4 PE=1 SV=1	0.148315	0.00145918	0	0	0	0.00049049	0.000122623	0	0	0	3	0.75	0.00090293	0.00074415	0.00081053	0.00084947	0.00082677	9	8	8	9	8.5
RTN4	Reticulon-4 OS=Homo sapiens GN=RTN4 PE=1 SV=2	0.148121	0.000763208	0	0	0.00011635	0.00016706	7.08525e-05	0	0	2	3	1.25	0.00037588	0.00044355	0.00048312	0.00061082	0.000478342	11	14	14	19	14.5
RPS15A	40S ribosomal protein S15a OS=Homo sapiens GN=RPS15A PE=1 SV=2	0.146225	0.00670904	0	0	0.0010668	0	0.0002667	0	0	2	0	0.5	0.0021933	0.001162	0.0015821	0.0023582	0.0018239	7	4	5	8	6
DNM1L	Dynamin-1-like protein OS=Homo sapiens GN=DNM1L PE=1 SV=2	0.142527	0.00213099	0	0	0.00047109	0	0.000117773	0	0	5	0	1.25	0.00071945	0.0010262	0.00072656	0.00083306	0.000826317	13	20	13	16	15.5
SNX9	Sorting nexin-9 OS=Homo sapiens GN=SNX9 PE=1 SV=1	0.142474	0.00257767	0	0.00036937	0	0	9.23425e-05	0	3	0	0	0.75	0.00054766	0.00057124	0.0008296	0.00064405	0.000648137	8	9	12	10	9.75
VCP	Transitional endoplasmic reticulum ATPase OS=Homo sapiens GN=VCP PE=1 SV=4	0.14214	2.9351e-05	0.00021534	0	0.00025811	0.00016471	0.00015954	2	0	3	2	1.75	0.0011118	0.0011245	0.00096967	0.0012837	0.00112242	22	24	19	27	23
RPS2	40S ribosomal protein S2 OS=Homo sapiens GN=RPS2 PE=1 SV=2	0.142029	0.00572889	0	0.00050006	0	0	0.000125015	0	2	0	0	0.5	0.0012512	0.00077335	0.00084234	0.00065394	0.000880207	9	6	6	5	6.5
MTOR	Serine/threonine-protein kinase mTOR OS=Homo sapiens GN=MTOR PE=1 SV=1	0.141305	0.00458685	0	0	0	5.2083e-05	1.30208e-05	0	0	0	2	0.5	6.3918e-05	0.00010371	8.0687e-05	0.00012027	9.21462e-05	4	7	5	8	6
RPS5	40S ribosomal protein S5 OS=Homo sapiens GN=RPS5 PE=1 SV=4	0.138876	0.00123093	0	0.0010773	0	0	0.000269325	0	3	0	0	0.75	0.0021963	0.0016661	0.0020164	0.0018785	0.00193932	11	9	10	10	10
AKAP9	A-kinase anchor protein 9 OS=Homo sapiens GN=AKAP9 PE=1 SV=3	0.138709	4.56498e-07	0.00013313	0.00031844	0.00017731	0.00023762	0.000216625	6	17	10	14	11.75	0.0016455	0.0014484	0.0015461	0.0016069	0.00156172	158	150	147	164	154.75
G3BP1	Ras GTPase-activating protein-binding protein 1 OS=Homo sapiens GN=G3BP1 PE=1 SV=1	0.132358	0.000548794	0	0.00031442	0	0.00042734	0.00018544	0	2	0	3	1.25	0.0013111	0.0014587	0.0017654	0.001069	0.00140105	15	18	20	13	16.5
FLOT2	Flotillin-2 OS=Homo sapiens GN=FLOT2 PE=1 SV=2	0.132048	0.0696437	0	0	0.00032404	0	8.101e-05	0	0	2	0	0.5	0.00095168	0.00017647	0.0010572	0.0002686	0.000613487	10	2	11	3	6.5
ERCC6L	DNA excision repair protein ERCC-6-like OS=Homo sapiens GN=ERCC6L PE=1 SV=1	0.127589	0.00044473	0	0	0.00016643	0.00026552	0.000107987	0	0	3	5	2	0.00071688	0.0010272	0.00069106	0.00095035	0.000846373	22	34	21	31	27
GEMIN5	Gem-associated protein 5 OS=Homo sapiens GN=GEMIN5 PE=1 SV=3	0.126563	4.71929e-05	0	0.00019432	0	0.00017607	9.25975e-05	0	4	0	4	2	0.00067526	0.00080139	0.00076377	0.00068611	0.000731633	25	32	28	27	28
ATXN2L	Ataxin-2-like protein OS=Homo sapiens GN=ATXN2L PE=1 SV=2	0.124642	8.71966e-05	0	0.0001363	0.00012901	0	6.63275e-05	0	2	2	0	1	0.00045468	0.00052696	0.00061223	0.00053471	0.000532145	12	15	16	15	14.5
GIGYF2	GRB10-interacting GYF protein 2 OS=Homo sapiens GN=GIGYF2 PE=1 SV=1	0.124336	0.000800546	0	0.00011279	0	0	2.81975e-05	0	2	0	0	0.5	0.00021949	0.00026165	0.00019	0.000236	0.000226785	7	9	6	8	7.5
EIF3G	Eukaryotic translation initiation factor 3 subunit G OS=Homo sapiens GN=EIF3G PE=1 SV=2	0.121317	0.00206551	0	0	0.0004334	0	0.00010835	0	0	2	0	0.5	0.0011456	0.00082612	0.00064273	0.00095802	0.000893117	9	7	5	8	7.25
FLOT1	Flotillin-1 OS=Homo sapiens GN=FLOT1 PE=1 SV=3	0.119921	0.00768008	0	0	0.0003248	0	8.12e-05	0	0	2	0	0.5	0.00076313	0.00035377	0.00096334	0.00062821	0.000677113	8	4	10	7	7.25
CSDE1	Cold shock domain-containing protein E1 OS=Homo sapiens GN=CSDE1 PE=1 SV=2	0.118241	6.74576e-06	0.0002175	0.00027541	0	0.00033273	0.00020641	2	3	0	4	2.25	0.0019396	0.0015617	0.0017526	0.0017288	0.00174568	38	33	34	36	35.25
AIMP2	Aminoacyl tRNA synthase complex-interacting multifunctional protein 2 OS=Homo sapiens GN=AIMP2 PE=1 SV=2	0.112624	0.000513083	0	0	0	0.00041488	0.00010372	0	0	0	2	0.5	0.00076372	0.0010622	0.00089982	0.00095802	0.00092094	6	9	7	8	7.5
TTC30A	Tetratricopeptide repeat protein 30A OS=Homo sapiens GN=TTC30A PE=2 SV=3	0.111607	0.00202466	0	0	0	0.00019964	4.991e-05	0	0	0	2	0.5	0.00061251	0.00039753	0.00043299	0.00034575	0.000447195	10	7	7	6	7.5
ERBIN	Erbin OS=Homo sapiens GN=ERBIN PE=1 SV=2	0.11116	9.32812e-05	0	0	0.00019644	0.00014103	8.43675e-05	0	0	4	3	1.75	0.00066348	0.00090937	0.00075743	0.00070562	0.000758975	23	34	26	26	27.25
PRPF8	Pre-mRNA-processing-splicing factor 8 OS=Homo sapiens GN=PRPF8 PE=1 SV=2	0.107409	1.13849e-06	0	0.0001255	0.00014849	0.00011371	9.6925e-05	0	4	5	4	3.25	0.00085476	0.00090572	0.00088082	0.00096828	0.000902395	49	56	50	59	53.5
UBE2O	E2 ubiquitin-conjugating enzyme OS=Homo sapiens GN=UBE2O PE=1 SV=3	0.103417	0.000405147	0	0	0	0.00015413	3.85325e-05	0	0	0	3	0.75	0.00031526	0.00037999	0.00035022	0.0004449	0.000372592	10	13	11	15	12.25
TAB1	TGF-beta-activated kinase 1 and MAP3K7-binding protein 1 OS=Homo sapiens GN=TAB1 PE=1 SV=1	0.100752	0.00110674	0	0	0	0.00039512	9.878e-05	0	0	0	3	0.75	0.00096981	0.00067438	0.001061	0.0012165	0.000980423	12	9	13	16	12.5
RELA	Transcription factor p65 OS=Homo sapiens GN=RELA PE=1 SV=2	0.097383	0.00048789	0	0	0.0002517	0	6.2925e-05	0	0	2	0	0.5	0.00081316	0.00054832	0.00059723	0.00062593	0.00064616	11	8	8	9	9
GIT1	ARF GTPase-activating protein GIT1 OS=Homo sapiens GN=GIT1 PE=1 SV=2	0.0926643	0.00519728	0.00022807	0	0	0	5.70175e-05	2	0	0	0	0.5	0.00048172	0.00069476	0.00037837	0.0009064	0.000615312	9	14	7	18	12
NUP133	Nuclear pore complex protein Nup133 OS=Homo sapiens GN=NUP133 PE=1 SV=2	0.0891231	0.000826228	0	0.00012675	0	0	3.16875e-05	0	2	0	0	0.5	0.00028188	0.0004247	0.00028467	0.00043094	0.000355547	8	13	8	13	10.5
WDR62	WD repeat-containing protein 62 OS=Homo sapiens GN=WDR62 PE=1 SV=4	0.0888123	0.000112081	0	0	0	8.7457e-05	2.18642e-05	0	0	0	2	0.5	0.00024149	0.00024878	0.00021678	0.00027769	0.000246185	9	10	8	11	9.5
NPM1	Nucleophosmin OS=Homo sapiens GN=NPM1 PE=1 SV=2	0.0884658	0.000120895	0	0	0	0.00090313	0.000225783	0	0	0	4	1	0.0023553	0.0025691	0.0029382	0.0023462	0.0025522	17	20	21	18	19
SPDL1	Protein Spindly OS=Homo sapiens GN=SPDL1 PE=1 SV=2	0.0769118	0.000268173	0	0	0	0.00032916	8.229e-05	0	0	0	3	0.75	0.00080791	0.0012484	0.0010199	0.0012035	0.00106993	12	20	15	19	16.5
CEP170	Centrosomal protein of 170 kDa OS=Homo sapiens GN=CEP170 PE=1 SV=1	0.0759303	0.000421878	0	9.2499e-05	8.7556e-05	0	4.50137e-05	0	2	2	0	1	0.00046286	0.00071525	0.00046744	0.00072577	0.00059283	18	30	18	30	24
EHBP1	EH domain-binding protein 1 OS=Homo sapiens GN=EHBP1 PE=1 SV=3	0.0737176	0.000129249	0.00014099	0	0	0	3.52475e-05	2	0	0	0	0.5	0.00043015	0.00055222	0.00040099	0.00052921	0.000478142	13	18	12	17	15
CEP97	Centrosomal protein of 97 kDa OS=Homo sapiens GN=CEP97 PE=1 SV=1	0.0718647	0.00111972	0	0	0	0.00015348	3.837e-05	0	0	0	2	0.5	0.00051798	0.00043659	0.00042799	0.00075312	0.00053392	11	10	9	17	11.75
ALMS1	Alstrom syndrome protein 1 OS=Homo sapiens GN=ALMS1 PE=1 SV=3	0.071607	0.0008833	0	0	3.3283e-05	3.186e-05	1.62858e-05	0	0	2	2	1	0.0001564	0.00029908	0.00018756	0.00026669	0.000227432	16	33	19	29	24.25
WASHC4	WASH complex subunit 4 OS=Homo sapiens GN=WASHC4 PE=1 SV=2	0.071223	0.00036547	0.00014797	0	0	0	3.69925e-05	2	0	0	0	0.5	0.00052087	0.00067611	0.00045588	0.0004247	0.00051939	15	21	13	13	15.5
KPNA2	Importin subunit alpha-1 OS=Homo sapiens GN=KPNA2 PE=1 SV=1	0.0679568	1.6174e-05	0.00049215	0	0	0	0.000123038	3	0	0	0	0.75	0.001925	0.0017848	0.0018662	0.0016661	0.00181053	25	25	24	23	24.25
MTR	Methionine synthase OS=Homo sapiens GN=MTR PE=1 SV=2	0.0677267	0.00081226	0	0	0	0.00010495	2.62375e-05	0	0	0	2	0.5	0.00038639	0.0003881	0.00026014	0.00051498	0.000387403	12	13	8	17	12.5
WASHC5	WASH complex subunit 5 OS=Homo sapiens GN=WASHC5 PE=1 SV=1	0.0665207	3.13757e-05	0	0	0	0.00022909	5.72725e-05	0	0	0	4	1	0.00084346	0.00074944	0.00095827	0.00089272	0.000860973	24	23	27	27	25.25
MACF1	Microtubule-actin cross-linking factor 1, isoforms 1/2/3/5 OS=Homo sapiens GN=MACF1 PE=1 SV=4	0.0658181	5.06738e-06	0	1.9832e-05	0	3.5939e-05	1.39428e-05	0	2	0	4	1.5	0.00020399	0.00024025	0.00020601	0.0001971	0.000211837	37	47	37	38	39.75
EIF3I	Eukaryotic translation initiation factor 3 subunit I OS=Homo sapiens GN=EIF3I PE=1 SV=1	0.0637972	7.37714e-06	0.00053404	0	0	0	0.00013351	2	0	0	0	0.5	0.0020053	0.0020916	0.0021516	0.0021224	0.00209273	16	18	17	18	17.25
SYNRG	Synergin gamma OS=Homo sapiens GN=SYNRG PE=1 SV=2	0.0634	1.31151e-05	0	0	0	0.00010104	2.526e-05	0	0	0	2	0.5	0.00043398	0.00037363	0.00040696	0.00037912	0.000398423	14	13	13	13	13.25
LARP1	La-related protein 1 OS=Homo sapiens GN=LARP1 PE=1 SV=2	0.0623225	5.26985e-05	0	0	0	0.00012113	3.02825e-05	0	0	0	2	0.5	0.0005203	0.00041349	0.00045038	0.00055943	0.0004859	14	12	12	16	13.5
RPL15	60S ribosomal protein L15 OS=Homo sapiens GN=RPL15 PE=1 SV=2	0.0618824	0.00053418	0	0	0	0.00065078	0.000162695	0	0	0	2	0.5	0.0027953	0.0018512	0.0034279	0.002442	0.0026291	14	10	17	13	13.5
PKM	Pyruvate kinase PKM OS=Homo sapiens GN=PKM PE=1 SV=4	0.0611262	1.08516e-05	0.00032686	0	0	0	8.1715e-05	2	0	0	0	0.5	0.0014575	0.0013513	0.0012395	0.001299	0.00133683	19	19	16	18	18
NUP50	Nuclear pore complex protein Nup50 OS=Homo sapiens GN=NUP50 PE=1 SV=2	0.0555338	2.51082e-05	0	0.00031307	0	0.00028368	0.000149188	0	2	0	2	1	0.0026981	0.0024209	0.0032521	0.0023746	0.00268643	31	30	37	29	31.75
ATG2B	Autophagy-related protein 2 homolog B OS=Homo sapiens GN=ATG2B PE=1 SV=5	0.0531637	6.54055e-07	0.00012529	7.0509e-05	0.00010011	0	7.39772e-05	3	2	3	0	2	0.0013525	0.0015266	0.0012669	0.00142	0.0013915	69	84	64	77	73.5
WDR26	WD repeat-containing protein 26 OS=Homo sapiens GN=WDR26 PE=1 SV=3	0.0519551	2.3583e-05	0	0	0	0.00020085	5.02125e-05	0	0	0	2	0.5	0.00092433	0.0011427	0.00087123	0.00092758	0.00096646	15	20	14	16	16.25
TBL1XR1	F-box-like/WD repeat-containing protein TBL1XR1 OS=Homo sapiens GN=TBL1XR1 PE=1 SV=1	0.0510354	8.63962e-06	0	0	0	0.00025829	6.45725e-05	0	0	0	2	0.5	0.0011094	0.0012491	0.0013605	0.001342	0.00126525	14	17	17	18	16.5
DENND4C	DENN domain-containing protein 4C OS=Homo sapiens GN=DENND4C PE=1 SV=3	0.0499612	0.00111783	0	0	0	6.9544e-05	1.7386e-05	0	0	0	2	0.5	0.0002347	0.00041544	0.00028012	0.0004617	0.00034799	11	21	13	23	17
PPP2R1A	Serine/threonine-protein phosphatase 2A 65 kDa regulatory subunit A alpha isoform OS=Homo sapiens GN=PPP2R1A PE=1 SV=4	0.048148	3.68339e-06	0	0	0	0.0002254	5.635e-05	0	0	0	2	0.5	0.0011756	0.0012824	0.0011174	0.001106	0.00117035	17	20	16	17	17.5
AGTPBP1	Cytosolic carboxypeptidase 1 OS=Homo sapiens GN=AGTPBP1 PE=1 SV=3	0.0362093	3.34255e-06	0	0	0	0.00010829	2.70725e-05	0	0	0	2	0.5	0.00073092	0.00067768	0.00073814	0.00084393	0.000747667	22	22	22	27	23.25
EPB41L2	Band 4.1-like protein 2 OS=Homo sapiens GN=EPB41L2 PE=1 SV=1	0.0357871	3.81267e-06	0	0	0.000207	0	5.175e-05	0	0	3	0	0.75	0.0014591	0.0013152	0.0016372	0.0013727	0.00144605	36	35	40	36	36.75
PDE4DIP	Myomegalin OS=Homo sapiens GN=PDE4DIP PE=1 SV=1	0.0351408	2.76415e-06	0	0	0	5.659e-05	1.41475e-05	0	0	0	2	0.5	0.0004167	0.00043464	0.00035068	0.00040836	0.000402595	24	27	20	25	24
PCM1	Pericentriolar material 1 protein OS=Homo sapiens GN=PCM1 PE=1 SV=4	0.0245929	1.13018e-06	0	0	0.00010278	0	2.5695e-05	0	0	3	0	0.75	0.0010666	0.0010076	0.0011584	0.00094666	0.00104481	53	54	57	50	53.5
NCL	Nucleolin OS=Homo sapiens GN=NCL PE=1 SV=3	0.0179961	2.13174e-07	0	0	0	0.00018699	4.67475e-05	0	0	0	2	0.5	0.0028111	0.0026595	0.0024912	0.0024288	0.00259765	49	50	43	45	46.75
TJP1	Tight junction protein ZO-1 OS=Homo sapiens GN=TJP1 PE=1 SV=3	0	4.04208e-10	0	0	0	0	0	0	0	0	0	0	0.00081557	0.00077778	0.00082363	0.00078921	0.000801548	35	36	35	36	35.5
SF3B3	Splicing factor 3B subunit 3 OS=Homo sapiens GN=SF3B3 PE=1 SV=4	0	9.05391e-10	0	0	0	0	0	0	0	0	0	0	0.0008702	0.00093095	0.0008788	0.00088166	0.000890402	26	30	26	28	27.5
SART3	Squamous cell carcinoma antigen recognized by T-cells 3 OS=Homo sapiens GN=SART3 PE=1 SV=1	0	1.48954e-09	0	0	0	0	0	0	0	0	0	0	0.00071905	0.00074511	0.00076887	0.00071628	0.000737328	17	19	18	18	18
KIF23	Kinesin-like protein KIF23 OS=Homo sapiens GN=KIF23 PE=1 SV=3	0	6.46913e-09	0	0	0	0	0	0	0	0	0	0	0.00016972	0.00015736	0.00017139	0.00015967	0.000164535	4	4	4	4	4
PSMD8	26S proteasome non-ATPase regulatory subunit 8 OS=Homo sapiens GN=PSMD8 PE=1 SV=2	0	6.46926e-09	0	0	0	0	0	0	0	0	0	0	0.00023275	0.0002158	0.00023505	0.00021898	0.000225645	2	2	2	2	2
HEXIM1	Protein HEXIM1 OS=Homo sapiens GN=HEXIM1 PE=1 SV=1	0	6.47612e-09	0	0	0	0	0	0	0	0	0	0	0.00034038	0.00031559	0.00034374	0.00032023	0.000329985	3	3	3	3	3
AP1M1	AP-1 complex subunit mu-1 OS=Homo sapiens GN=AP1M1 PE=1 SV=3	0	6.47931e-09	0	0	0	0	0	0	0	0	0	0	0.00019259	0.00017856	0.00019449	0.00018119	0.000186707	2	2	2	2	2
SNRPE	Small nuclear ribonucleoprotein E OS=Homo sapiens GN=SNRPE PE=1 SV=1	0	6.47942e-09	0	0	0	0	0	0	0	0	0	0	0.00088548	0.00082099	0.00089423	0.00083306	0.00085844	2	2	2	2	2
EPB41	Protein 4.1 OS=Homo sapiens GN=EPB41 PE=1 SV=4	0	6.48102e-09	0	0	0	0	0	0	0	0	0	0	9.4287e-05	8.742e-05	9.5219e-05	8.8705e-05	9.14077e-05	2	3	3	3	2.75
SF1	Splicing factor 1 OS=Homo sapiens GN=SF1 PE=1 SV=4	0	6.48355e-09	0	0	0	0	0	0	0	0	0	0	0.00019123	0.0001773	0.00019312	0.00017991	0.00018539	3	3	3	3	3
DDX42	ATP-dependent RNA helicase DDX42 OS=Homo sapiens GN=DDX42 PE=1 SV=1	0	6.48815e-09	0	0	0	0	0	0	0	0	0	0	0.00013027	0.00012078	0.00013156	0.00012256	0.000126292	3	3	3	3	3
DHX40	Probable ATP-dependent RNA helicase DHX40 OS=Homo sapiens GN=DHX40 PE=1 SV=2	0	6.49411e-09	0	0	0	0	0	0	0	0	0	0	0.00010458	9.6959e-05	0.00010561	9.8384e-05	0.000101383	2	2	2	2	2
RPL10A	60S ribosomal protein L10a OS=Homo sapiens GN=RPL10A PE=1 SV=2	0	1.07083e-08	0	0	0	0	0	0	0	0	0	0	0.001877	0.0017403	0.0018956	0.0019425	0.00186385	10	10	10	11	10.25
NUMA1	Nuclear mitotic apparatus protein 1 OS=Homo sapiens GN=NUMA1 PE=1 SV=2	0	1.69555e-08	0	0	0	0	0	0	0	0	0	0	0.0014059	0.0012678	0.001342	0.0012683	0.001321	73	71	69	70	70.75
AFDN	Afadin OS=Homo sapiens GN=AFDN PE=1 SV=3	0	2.53007e-08	0	0	0	0	0	0	0	0	0	0	0.0006476	0.00057973	0.00063145	0.00058826	0.00061176	29	28	28	28	28.25
PNN	Pinin OS=Homo sapiens GN=PNN PE=1 SV=4	0	2.65598e-08	0	0	0	0	0	0	0	0	0	0	0.00045447	0.00042137	0.00045896	0.00048101	0.000453953	8	8	8	9	8.25
BIRC6	Baculoviral IAP repeat-containing protein 6 OS=Homo sapiens GN=BIRC6 PE=1 SV=2	0	3.41966e-08	0	0	0	0	0	0	0	0	0	0	0.00074638	0.00083975	0.0007961	0.00084421	0.00080661	89	108	94	107	99.5
YTHDC2	Probable ATP-dependent RNA helicase YTHDC2 OS=Homo sapiens GN=YTHDC2 PE=1 SV=2	0	3.69095e-08	0	0	0	0	0	0	0	0	0	0	0.0001709	0.00018487	0.00017259	0.00016079	0.000172288	6	7	6	6	6.25
EIF3L	Eukaryotic translation initiation factor 3 subunit L OS=Homo sapiens GN=EIF3L PE=1 SV=1	0	5.67256e-08	0	0	0	0	0	0	0	0	0	0	0.0007222	0.0006696	0.0006564	0.00074739	0.000698898	10	10	9	11	10
ILF3	Interleukin enhancer-binding factor 3 OS=Homo sapiens GN=ILF3 PE=1 SV=3	0	5.78907e-08	0	0	0	0	0	0	0	0	0	0	0.00063786	0.00067589	0.00064416	0.00072869	0.00067165	14	16	14	17	15.25
SPTBN1	Spectrin beta chain, non-erythrocytic 1 OS=Homo sapiens GN=SPTBN1 PE=1 SV=2	0	6.20954e-08	0	0	0	0	0	0	0	0	0	0	0.0015162	0.0013739	0.0016008	0.0015075	0.0014996	88	86	92	93	89.75
BOD1L1	Biorientation of chromosomes in cell division protein 1-like 1 OS=Homo sapiens GN=BOD1L1 PE=1 SV=2	0	6.46609e-08	0	0	0	0	0	0	0	0	0	0	0.00050731	0.00053226	0.00055277	0.00047728	0.000517405	38	43	41	38	40
EBNA1BP2	Probable rRNA-processing protein EBP2 OS=Homo sapiens GN=EBNA1BP2 PE=1 SV=2	0	6.71241e-08	0	0	0	0	0	0	0	0	0	0	0.00066556	0.0007405	0.00067213	0.00075139	0.000707395	5	6	5	6	5.5
DHX29	ATP-dependent RNA helicase DHX29 OS=Homo sapiens GN=DHX29 PE=1 SV=2	0	7.28974e-08	0	0	0	0	0	0	0	0	0	0	0.00077358	0.00071724	0.00066104	0.00072779	0.000719912	26	26	22	26	25
NASP	Nuclear autoantigenic sperm protein OS=Homo sapiens GN=NASP PE=1 SV=2	0	9.31266e-08	0	0	0	0	0	0	0	0	0	0	0.0016024	0.0018212	0.0017748	0.0016048	0.0017008	31	38	34	33	34
AIMP1	Aminoacyl tRNA synthase complex-interacting multifunctional protein 1 OS=Homo sapiens GN=AIMP1 PE=1 SV=2	0	9.31514e-08	0	0	0	0	0	0	0	0	0	0	0.001175	0.0012104	0.0010547	0.0012282	0.00116708	9	10	8	10	9.25
SARS	Serine--tRNA ligase, cytoplasmic OS=Homo sapiens GN=SARS PE=1 SV=3	0	9.31672e-08	0	0	0	0	0	0	0	0	0	0	0.00071321	0.00073474	0.00064022	0.00074554	0.000708427	9	10	8	10	9.25
THOC2	THO complex subunit 2 OS=Homo sapiens GN=THOC2 PE=1 SV=2	0	9.39576e-08	0	0	0	0	0	0	0	0	0	0	0.00015342	0.00016595	0.00018075	0.00016839	0.000167128	6	7	7	7	6.75
EDC4	Enhancer of mRNA-decapping protein 4 OS=Homo sapiens GN=EDC4 PE=1 SV=1	0	1.00098e-07	0	0	0	0	0	0	0	0	0	0	0.0015118	0.0016982	0.0017029	0.0017779	0.0016727	52	63	58	65	59.5
RPS11	40S ribosomal protein S11 OS=Homo sapiens GN=RPS11 PE=1 SV=3	0	1.26931e-07	0	0	0	0	0	0	0	0	0	0	0.0015468	0.0014341	0.0013017	0.0014552	0.00143445	6	6	5	6	5.75
RPL18	60S ribosomal protein L18 OS=Homo sapiens GN=RPL18 PE=1 SV=2	0	1.31113e-07	0	0	0	0	0	0	0	0	0	0	0.0025999	0.0030132	0.0026256	0.0028537	0.0027731	12	15	12	14	13.25
TPR	Nucleoprotein TPR OS=Homo sapiens GN=TPR PE=1 SV=3	0	1.65381e-07	0	0	0	0	0	0	0	0	0	0	0.00036199	0.00039955	0.00036556	0.00042164	0.000387185	21	25	21	26	23.25
CGN	Cingulin OS=Homo sapiens GN=CGN PE=1 SV=2	0	2.14456e-07	0	0	0	0	0	0	0	0	0	0	0.0010209	0.0011989	0.0010997	0.0010244	0.00108597	30	38	32	32	33
TP53BP1	TP53-binding protein 1 OS=Homo sapiens GN=TP53BP1 PE=1 SV=2	0	2.19182e-07	0	0	0	0	0	0	0	0	0	0	0.00057834	0.00049792	0.00052148	0.00058297	0.000545177	28	26	25	30	27.25
RPL26	60S ribosomal protein L26 OS=Homo sapiens GN=RPL26 PE=1 SV=1	0	2.36886e-07	0	0	0	0	0	0	0	0	0	0	0.0014046	0.0015627	0.0017021	0.0015857	0.00156377	5	6	6	6	5.75
SPTAN1	Spectrin alpha chain, non-erythrocytic 1 OS=Homo sapiens GN=SPTAN1 PE=1 SV=3	0	2.54194e-07	0	0	0	0	0	0	0	0	0	0	0.0020267	0.0016958	0.0018304	0.0017517	0.00182615	123	111	110	113	114.25
GTF3C3	General transcription factor 3C polypeptide 3 OS=Homo sapiens GN=GTF3C3 PE=1 SV=1	0	2.87179e-07	0	0	0	0	0	0	0	0	0	0	0.00041376	0.000341	0.00037142	0.00038926	0.00037886	9	8	8	9	8.5
RPL36	60S ribosomal protein L36 OS=Homo sapiens GN=RPL36 PE=1 SV=3	0	3.16824e-07	0	0	0	0	0	0	0	0	0	0	0.0019396	0.0017984	0.0019588	0.0021898	0.00197165	5	5	5	6	5.25
CDR2	Cerebellar degeneration-related protein 2 OS=Homo sapiens GN=CDR2 PE=1 SV=2	0	3.56128e-07	0	0	0	0	0	0	0	0	0	0	0.00062803	0.00074865	0.00072484	0.00075966	0.000715295	7	9	8	9	8.25
RPL27	60S ribosomal protein L27 OS=Homo sapiens GN=RPL27 PE=1 SV=2	0	4.1339e-07	0	0	0	0	0	0	0	0	0	0	0.002396	0.0022215	0.0027221	0.0025359	0.00246887	8	8	9	9	8.5
STAT1	Signal transducer and activator of transcription 1-alpha/beta OS=Homo sapiens GN=STAT1 PE=1 SV=2	0	4.32088e-07	0	0	0	0	0	0	0	0	0	0	0.00097757	0.00080566	0.00093238	0.00097079	0.0009216	18	16	17	19	17.5
GOLGA3	Golgin subfamily A member 3 OS=Homo sapiens GN=GOLGA3 PE=1 SV=2	0	4.34081e-07	0	0	0	0	0	0	0	0	0	0	0.00040786	0.00037816	0.00035697	0.00033256	0.000368887	15	15	13	13	14
PPP6R3	Serine/threonine-protein phosphatase 6 regulatory subunit 3 OS=Homo sapiens GN=PPP6R3 PE=1 SV=2	0	4.35107e-07	0	0	0	0	0	0	0	0	0	0	0.00037326	0.00043259	0.00037695	0.00043895	0.000405437	8	10	8	10	9
CRKL	Crk-like protein OS=Homo sapiens GN=CRKL PE=1 SV=1	0	4.35282e-07	0	0	0	0	0	0	0	0	0	0	0.00053772	0.00062319	0.00054303	0.00063236	0.000584075	4	5	4	5	4.5
TRIM28	Transcription intermediary factor 1-beta OS=Homo sapiens GN=TRIM28 PE=1 SV=5	0	4.40511e-07	0	0	0	0	0	0	0	0	0	0	0.0027805	0.0029851	0.0024139	0.0027077	0.0027218	57	66	49	59	57.75
STRN	Striatin OS=Homo sapiens GN=STRN PE=1 SV=4	0	5.04857e-07	0	0	0	0	0	0	0	0	0	0	0.0013055	0.0011136	0.0013711	0.0013265	0.00127918	25	23	26	27	25.25
SMCHD1	Structural maintenance of chromosomes flexible hinge domain-containing protein 1 OS=Homo sapiens GN=SMCHD1 PE=1 SV=2	0	5.55057e-07	0	0	0	0	0	0	0	0	0	0	0.00044693	0.00045205	0.00045135	0.00053515	0.00047137	22	24	22	28	24
PRKAR1A	cAMP-dependent protein kinase type I-alpha regulatory subunit OS=Homo sapiens GN=PRKAR1A PE=1 SV=1	0	5.56582e-07	0	0	0	0	0	0	0	0	0	0	0.00042763	0.00049561	0.00043186	0.00040232	0.000439355	4	5	4	4	4.25
NR3C1	Glucocorticoid receptor OS=Homo sapiens GN=NR3C1 PE=1 SV=1	0	5.95091e-07	0	0	0	0	0	0	0	0	0	0	0.00089118	0.0010207	0.0010588	0.00088774	0.000964605	17	21	20	18	19
CTPS1	CTP synthase 1 OS=Homo sapiens GN=CTPS1 PE=1 SV=2	0	6.08255e-07	0	0	0	0	0	0	0	0	0	0	0.0006892	0.00070291	0.00083522	0.00071325	0.000735145	10	11	12	11	11
SF3B1	Splicing factor 3B subunit 1 OS=Homo sapiens GN=SF3B1 PE=1 SV=3	0	7.47392e-07	0	0	0	0	0	0	0	0	0	0	0.0013432	0.0012743	0.0015772	0.0013518	0.00138663	43	44	50	46	45.75
CDK9	Cyclin-dependent kinase 9 OS=Homo sapiens GN=CDK9 PE=1 SV=3	0	7.63958e-07	0	0	0	0	0	0	0	0	0	0	0.00076646	0.00081216	0.00066346	0.0008241	0.000766545	7	8	6	8	7.25
SNRNP200	U5 small nuclear ribonucleoprotein 200 kDa helicase OS=Homo sapiens GN=SNRNP200 PE=1 SV=2	0	7.73601e-07	0	0	0	0	0	0	0	0	0	0	0.00068649	0.00067186	0.00075105	0.00082526	0.000733665	36	38	39	46	39.75
CNOT1	CCR4-NOT transcription complex subunit 1 OS=Homo sapiens GN=CNOT1 PE=1 SV=2	0	8.80562e-07	0	0	0	0	0	0	0	0	0	0	0.00049715	0.00061989	0.00058862	0.00061287	0.000579633	29	39	34	38	35
ZBTB2	Zinc finger and BTB domain-containing protein 2 OS=Homo sapiens GN=ZBTB2 PE=1 SV=1	0	1.03226e-06	0	0	0	0	0	0	0	0	0	0	0.00055472	0.00051431	0.0005602	0.00044732	0.000519137	7	7	7	6	6.75
GTF3C1	General transcription factor 3C polypeptide 1 OS=Homo sapiens GN=GTF3C1 PE=1 SV=4	0	1.17298e-06	0	0	0	0	0	0	0	0	0	0	0.00025107	0.00019697	0.00023405	0.00021804	0.000225032	13	11	12	12	12
DICER1	Endoribonuclease Dicer OS=Homo sapiens GN=DICER1 PE=1 SV=3	0	1.22398e-06	0	0	0	0	0	0	0	0	0	0	0.00019073	0.00021614	0.00017122	0.00017944	0.000189383	9	11	8	9	9.25
ZNF318	Zinc finger protein 318 OS=Homo sapiens GN=ZNF318 PE=1 SV=2	0	1.26391e-06	0	0	0	0	0	0	0	0	0	0	0.00035745	0.00033142	0.00036099	0.00028585	0.000333928	20	20	20	17	19.25
SRRM1	Serine/arginine repetitive matrix protein 1 OS=Homo sapiens GN=SRRM1 PE=1 SV=2	0	1.32838e-06	0	0	0	0	0	0	0	0	0	0	0.00027034	0.00025066	0.00031852	0.00029673	0.000284062	6	6	7	7	6.5
RPL7	60S ribosomal protein L7 OS=Homo sapiens GN=RPL7 PE=1 SV=1	0	1.44968e-06	0	0	0	0	0	0	0	0	0	0	0.0021351	0.0021319	0.0026538	0.0023178	0.00230965	13	14	16	15	14.5
COPS6	COP9 signalosome complex subunit 6 OS=Homo sapiens GN=COPS6 PE=1 SV=1	0	1.50633e-06	0	0	0	0	0	0	0	0	0	0	0.00074738	0.00069294	0.00062897	0.00058594	0.000663807	6	6	5	5	5.5
UBAP2L	Ubiquitin-associated protein 2-like OS=Homo sapiens GN=UBAP2L PE=1 SV=2	0	1.5089e-06	0	0	0	0	0	0	0	0	0	0	0.00078691	0.0010075	0.0009839	0.00095185	0.00093254	21	29	26	27	25.75
PEX5	Peroxisomal targeting signal 1 receptor OS=Homo sapiens GN=PEX5 PE=1 SV=3	0	1.6543e-06	0	0	0	0	0	0	0	0	0	0	0.0004462	0.0003546	0.00038624	0.00035982	0.000386715	7	6	6	6	6.25
NUP155	Nuclear pore complex protein Nup155 OS=Homo sapiens GN=NUP155 PE=1 SV=1	0	1.71235e-06	0	0	0	0	0	0	0	0	0	0	0.0004978	0.0004344	0.00047315	0.00038569	0.00044776	17	16	16	14	15.75
CIAPIN1	Anamorsin OS=Homo sapiens GN=CIAPIN1 PE=1 SV=2	0	1.74655e-06	0	0	0	0	0	0	0	0	0	0	0.0010444	0.00096834	0.0011866	0.0012282	0.00110688	8	8	9	10	8.75
NAT10	RNA cytidine acetyltransferase OS=Homo sapiens GN=NAT10 PE=1 SV=2	0	1.74801e-06	0	0	0	0	0	0	0	0	0	0	0.00047686	0.00036844	0.00040131	0.00041125	0.000414465	12	10	10	11	10.75
PSME3	Proteasome activator complex subunit 3 OS=Homo sapiens GN=PSME3 PE=1 SV=1	0	1.95555e-06	0	0	0	0	0	0	0	0	0	0	0.001764	0.0016355	0.0019434	0.0021122	0.00186377	11	11	12	14	12
TAF5	Transcription initiation factor TFIID subunit 5 OS=Homo sapiens GN=TAF5 PE=1 SV=3	0	1.99854e-06	0	0	0	0	0	0	0	0	0	0	0.00040732	0.00047207	0.00035993	0.00043111	0.000417608	8	10	7	9	8.5
DIDO1	Death-inducer obliterator 1 OS=Homo sapiens GN=DIDO1 PE=1 SV=5	0	2.0775e-06	0	0	0	0	0	0	0	0	0	0	9.092e-05	0.00010116	0.00011018	8.5537e-05	9.69493e-05	5	6	6	5	5.5
CDK7	Cyclin-dependent kinase 7 OS=Homo sapiens GN=CDK7 PE=1 SV=1	0	2.31262e-06	0	0	0	0	0	0	0	0	0	0	0.00047089	0.00043659	0.00035666	0.00044301	0.000426787	4	4	3	4	3.75
DOCK7	Dedicator of cytokinesis protein 7 OS=Homo sapiens GN=DOCK7 PE=1 SV=4	0	2.31358e-06	0	0	0	0	0	0	0	0	0	0	7.6135e-05	7.059e-05	5.7665e-05	7.1628e-05	6.90045e-05	4	4	3	4	3.75
SKA3	Spindle and kinetochore-associated protein 3 OS=Homo sapiens GN=SKA3 PE=1 SV=2	0	2.32268e-06	0	0	0	0	0	0	0	0	0	0	0.00069205	0.00073331	0.00069889	0.00055807	0.00067058	7	8	7	6	7
HERC1	Probable E3 ubiquitin-protein ligase HERC1 OS=Homo sapiens GN=HERC1 PE=1 SV=2	0	2.5544e-06	0	0	0	0	0	0	0	0	0	0	4.1897e-05	4.6614e-05	5.0773e-05	5.5183e-05	4.86167e-05	5	6	6	7	6
RRP12	RRP12-like protein OS=Homo sapiens GN=RRP12 PE=1 SV=2	0	2.68799e-06	0	0	0	0	0	0	0	0	0	0	0.00037686	0.00029118	0.00038058	0.00035455	0.000350793	12	10	12	12	11.5
RPL13A	60S ribosomal protein L13a OS=Homo sapiens GN=RPL13A PE=1 SV=2	0	2.70537e-06	0	0	0	0	0	0	0	0	0	0	0.0022072	0.0026045	0.0026342	0.0020765	0.0023806	11	14	13	11	12.25
TEX2	Testis-expressed protein 2 OS=Homo sapiens GN=TEX2 PE=1 SV=2	0	2.84747e-06	0	0	0	0	0	0	0	0	0	0	0.00050599	0.00040212	0.00040149	0.00040803	0.000429407	14	12	11	12	12.25
SF3A1	Splicing factor 3A subunit 1 OS=Homo sapiens GN=SF3A1 PE=1 SV=1	0	2.86553e-06	0	0	0	0	0	0	0	0	0	0	0.0010787	0.00085722	0.0011412	0.0010148	0.00102298	21	18	22	21	20.5
ANKRD28	Serine/threonine-protein phosphatase 6 regulatory ankyrin repeat subunit A OS=Homo sapiens GN=ANKRD28 PE=1 SV=5	0	3.05171e-06	0	0	0	0	0	0	0	0	0	0	0.00027077	0.00032278	0.00031251	0.00036392	0.000317495	7	10	8	11	9
H1FX	Histone H1x OS=Homo sapiens GN=H1FX PE=1 SV=1	0	3.29582e-06	0	0	0	0	0	0	0	0	0	0	0.00057369	0.00070921	0.00077248	0.00071964	0.000693755	3	4	4	4	3.75
RPL34	60S ribosomal protein L34 OS=Homo sapiens GN=RPL34 PE=1 SV=3	0	3.29588e-06	0	0	0	0	0	0	0	0	0	0	0.0010444	0.0012911	0.0014063	0.0013101	0.00126297	3	4	4	4	3.75
MOB4	MOB-like protein phocein OS=Homo sapiens GN=MOB4 PE=1 SV=1	0	3.35931e-06	0	0	0	0	0	0	0	0	0	0	0.0016293	0.0018463	0.0016454	0.0013625	0.00162087	9	11	9	8	9.25
PPP6C	Serine/threonine-protein phosphatase 6 catalytic subunit OS=Homo sapiens GN=PPP6C PE=1 SV=1	0	3.36862e-06	0	0	0	0	0	0	0	0	0	0	0.00093483	0.00086675	0.0010789	0.0011308	0.00100282	7	7	8	9	7.75
REPS1	RalBP1-associated Eps domain-containing protein 1 OS=Homo sapiens GN=REPS1 PE=1 SV=3	0	3.41935e-06	0	0	0	0	0	0	0	0	0	0	0.00051171	0.00061677	0.00067179	0.00067398	0.000618562	10	13	13	14	12.5
STIM1	Stromal interaction molecule 1 OS=Homo sapiens GN=STIM1 PE=1 SV=3	0	3.53881e-06	0	0	0	0	0	0	0	0	0	0	0.00017839	0.00022053	0.00018015	0.00022377	0.00020071	3	4	3	4	3.5
MYH10	Myosin-10 OS=Homo sapiens GN=MYH10 PE=1 SV=3	0	3.53948e-06	0	0	0	0	0	0	0	0	0	0	0.00018552	0.00022934	0.00018735	0.00023272	0.000208733	24	30	23	32	27.25
GPN1	GPN-loop GTPase 1 OS=Homo sapiens GN=GPN1 PE=1 SV=1	0	3.63803e-06	0	0	0	0	0	0	0	0	0	0	0.00032673	0.00040391	0.00032996	0.00030739	0.000341998	3	4	3	3	3.25
OSBPL9	Oxysterol-binding protein-related protein 9 OS=Homo sapiens GN=OSBPL9 PE=1 SV=2	0	3.63909e-06	0	0	0	0	0	0	0	0	0	0	0.00016603	0.00020525	0.00016767	0.0001562	0.000173787	3	4	3	3	3.25
RPL12	60S ribosomal protein L12 OS=Homo sapiens GN=RPL12 PE=1 SV=1	0	4.37901e-06	0	0	0	0	0	0	0	0	0	0	0.0029623	0.0025177	0.0022437	0.0023225	0.00251155	12	11	9	10	10.5
SCRIB	Protein scribble homolog OS=Homo sapiens GN=SCRIB PE=1 SV=4	0	4.38489e-06	0	0	0	0	0	0	0	0	0	0	0.00032486	0.00039387	0.00030283	0.00030563	0.000331797	13	17	12	13	13.75
PRKAR2B	cAMP-dependent protein kinase type II-beta regulatory subunit OS=Homo sapiens GN=PRKAR2B PE=1 SV=3	0	4.38614e-06	0	0	0	0	0	0	0	0	0	0	0.0012668	0.00099383	0.00098408	0.0011918	0.00110913	15	15	13	18	15.25
APC	Adenomatous polyposis coli protein OS=Homo sapiens GN=APC PE=1 SV=2	0	4.77085e-06	0	0	0	0	0	0	0	0	0	0	0.0001576	0.00017269	0.00013022	0.00017523	0.000158935	11	13	9	13	11.5
EFTUD2	116 kDa U5 small nuclear ribonucleoprotein component OS=Homo sapiens GN=EFTUD2 PE=1 SV=1	0	5.07191e-06	0	0	0	0	0	0	0	0	0	0	0.0012991	0.0011267	0.0013119	0.00098562	0.00118083	32	30	32	26	30
ARHGEF7	Rho guanine nucleotide exchange factor 7 OS=Homo sapiens GN=ARHGEF7 PE=1 SV=2	0	5.07901e-06	0	0	0	0	0	0	0	0	0	0	0.00025362	0.00028218	0.0002049	0.00023861	0.000244827	5	6	4	5	5
WRNIP1	ATPase WRNIP1 OS=Homo sapiens GN=WRNIP1 PE=1 SV=2	0	5.35618e-06	0	0	0	0	0	0	0	0	0	0	0.0015925	0.0015333	0.0011753	0.0015559	0.00146425	26	27	19	27	24.75
HUWE1	E3 ubiquitin-protein ligase HUWE1 OS=Homo sapiens GN=HUWE1 PE=1 SV=3	0	5.64481e-06	0	0	0	0	0	0	0	0	0	0	0.00027937	0.00027629	0.00028213	0.0003592	0.000299247	30	32	30	41	33.25
GTF2I	General transcription factor II-I OS=Homo sapiens GN=GTF2I PE=1 SV=2	0	5.97121e-06	0	0	0	0	0	0	0	0	0	0	0.00040814	0.00030273	0.00041217	0.00038398	0.000376755	10	8	10	10	9.5
PRPF19	Pre-mRNA-processing factor 19 OS=Homo sapiens GN=PRPF19 PE=1 SV=1	0	6.03182e-06	0	0	0	0	0	0	0	0	0	0	0.0012931	0.0011989	0.0014691	0.0010645	0.0012564	16	16	18	14	16
SF3A2	Splicing factor 3A subunit 2 OS=Homo sapiens GN=SF3A2 PE=1 SV=2	0	6.05436e-06	0	0	0	0	0	0	0	0	0	0	0.00061449	0.00056974	0.00044326	0.00057811	0.0005514	7	7	5	7	6.5
PLK1	Serine/threonine-protein kinase PLK1 OS=Homo sapiens GN=PLK1 PE=1 SV=1	0	6.18248e-06	0	0	0	0	0	0	0	0	0	0	0.00033774	0.00025052	0.00027287	0.00031775	0.00029472	5	4	4	5	4.5
RMND5A	Protein RMD5 homolog A OS=Homo sapiens GN=RMND5A PE=1 SV=1	0	6.18525e-06	0	0	0	0	0	0	0	0	0	0	0.00052087	0.00038635	0.00042081	0.00049003	0.000454515	5	4	4	5	4.5
MAVS	Mitochondrial antiviral-signaling protein OS=Homo sapiens GN=MAVS PE=1 SV=2	0	6.21838e-06	0	0	0	0	0	0	0	0	0	0	0.00045258	0.00041962	0.00045705	0.00056771	0.00047424	6	6	6	8	6.5
SETD1A	Histone-lysine N-methyltransferase SETD1A OS=Homo sapiens GN=SETD1A PE=1 SV=3	0	6.22045e-06	0	0	0	0	0	0	0	0	0	0	7.1585e-05	6.6372e-05	7.2293e-05	8.9797e-05	7.50118e-05	3	3	3	4	3.25
MKLN1	Muskelin OS=Homo sapiens GN=MKLN1 PE=1 SV=2	0	6.22385e-06	0	0	0	0	0	0	0	0	0	0	0.00016625	0.00015414	0.0001679	0.00020855	0.00017421	3	3	3	4	3.25
GTF3C5	General transcription factor 3C polypeptide 5 OS=Homo sapiens GN=GTF3C5 PE=1 SV=2	0	6.67866e-06	0	0	0	0	0	0	0	0	0	0	0.00054937	0.00072766	0.0005548	0.00059069	0.00060563	7	10	7	8	8
RIF1	Telomere-associated protein RIF1 OS=Homo sapiens GN=RIF1 PE=1 SV=2	0	6.96368e-06	0	0	0	0	0	0	0	0	0	0	0.00042841	0.00056526	0.00056577	0.00046506	0.000506125	26	37	34	30	31.75
CAPZA2	F-actin-capping protein subunit alpha-2 OS=Homo sapiens GN=CAPZA2 PE=1 SV=3	0	7.22677e-06	0	0	0	0	0	0	0	0	0	0	0.00085452	0.00079228	0.0010068	0.0010719	0.000931375	7	7	9	8	7.75
KARS	Lysine--tRNA ligase OS=Homo sapiens GN=KARS PE=1 SV=3	0	7.37289e-06	0	0	0	0	0	0	0	0	0	0	0.00040937	0.00056933	0.00055122	0.00051351	0.000510858	6	9	8	8	7.75
CNOT9	CCR4-NOT transcription complex subunit 9 OS=Homo sapiens GN=CNOT9 PE=1 SV=1	0	7.8855e-06	0	0	0	0	0	0	0	0	0	0	0.0013623	0.0011368	0.00096301	0.0011535	0.0011539	10	9	7	9	8.75
RPLP0	60S acidic ribosomal protein P0 OS=Homo sapiens GN=RPLP0 PE=1 SV=1	0	8.0732e-06	0	0	0	0	0	0	0	0	0	0	0.0019274	0.0020253	0.0019464	0.0014506	0.00183742	15	17	15	12	14.75
CYFIP1	Cytoplasmic FMR1-interacting protein 1 OS=Homo sapiens GN=CYFIP1 PE=1 SV=1	0	8.59676e-06	0	0	0	0	0	0	0	0	0	0	0.00032508	0.0003014	0.0002298	0.00030583	0.000290528	10	10	7	10	9.25
HNRNPK	Heterogeneous nuclear ribonucleoprotein K OS=Homo sapiens GN=HNRNPK PE=1 SV=1	0	9.08167e-06	0	0	0	0	0	0	0	0	0	0	0.00087974	0.00065253	0.00088843	0.00091043	0.000832782	10	8	10	11	9.75
PPP1CA	Serine/threonine-protein phosphatase PP1-alpha catalytic subunit OS=Homo sapiens GN=PPP1CA PE=1 SV=1	0	9.09393e-06	0	0	0	0	0	0	0	0	0	0	0.00061715	0.00045776	0.0004986	0.00046449	0.0005095	21	24	23	24	23
NCKAP1	Nck-associated protein 1 OS=Homo sapiens GN=NCKAP1 PE=1 SV=1	0	9.10906e-06	0	0	0	0	0	0	0	0	0	0	0.00032499	0.00036828	0.00029173	0.00040767	0.000348167	9	11	8	12	10
RPL10	60S ribosomal protein L10 OS=Homo sapiens GN=RPL10 PE=1 SV=4	0	9.26634e-06	0	0	0	0	0	0	0	0	0	0	0.0030454	0.0021177	0.002691	0.002686	0.00263503	16	12	14	15	14.25
SLMAP	Sarcolemmal membrane-associated protein OS=Homo sapiens GN=SLMAP PE=1 SV=1	0	9.52918e-06	0	0	0	0	0	0	0	0	0	0	0.00044274	0.0004561	0.00059615	0.00046281	0.00048945	9	10	12	10	10.25
MASTL	Serine/threonine-protein kinase greatwall OS=Homo sapiens GN=MASTL PE=1 SV=1	0	9.87007e-06	0	0	0	0	0	0	0	0	0	0	0.00050973	0.00073039	0.00065516	0.00061034	0.000626405	11	17	14	14	14
STAU1	Double-stranded RNA-binding protein Staufen homolog 1 OS=Homo sapiens GN=STAU1 PE=1 SV=2	0	1.02702e-05	0	0	0	0	0	0	0	0	0	0	0.00056474	0.00052361	0.00064161	0.00073055	0.000615127	8	8	9	11	9
EIF3M	Eukaryotic translation initiation factor 3 subunit M OS=Homo sapiens GN=EIF3M PE=1 SV=1	0	1.13531e-05	0	0	0	0	0	0	0	0	0	0	0.00054455	0.00070684	0.00054993	0.00051231	0.000578407	5	7	5	5	5.5
MAEA	Macrophage erythroblast attacher OS=Homo sapiens GN=MAEA PE=1 SV=1	0	1.15491e-05	0	0	0	0	0	0	0	0	0	0	0.0023657	0.0017166	0.0017659	0.0020322	0.0019701	23	18	17	21	19.75
CLASP2	CLIP-associating protein 2 OS=Homo sapiens GN=CLASP2 PE=1 SV=2	0	1.16489e-05	0	0	0	0	0	0	0	0	0	0	0.00012591	0.00011674	0.00015894	0.00011846	0.000130012	4	4	5	4	4.25
FTSJ3	pre-rRNA processing protein FTSJ3 OS=Homo sapiens GN=FTSJ3 PE=1 SV=2	0	1.16516e-05	0	0	0	0	0	0	0	0	0	0	0.00019236	0.00017835	0.00024282	0.00018097	0.000198625	4	4	5	4	4.25
FGFR1OP	FGFR1 oncogene partner OS=Homo sapiens GN=FGFR1OP PE=1 SV=1	0	1.1691e-05	0	0	0	0	0	0	0	0	0	0	0.0011229	0.00085185	0.0012371	0.0010565	0.00106709	11	9	12	11	10.75
KIF21A	Kinesin-like protein KIF21A OS=Homo sapiens GN=KIF21A PE=1 SV=2	0	1.23407e-05	0	0	0	0	0	0	0	0	0	0	0.00019466	0.0002256	0.00017201	0.00016024	0.000188127	8	10	7	7	8
ARFGEF3	Brefeldin A-inhibited guanine nucleotide-exchange protein 3 OS=Homo sapiens GN=ARFGEF3 PE=1 SV=3	0	1.2859e-05	0	0	0	0	0	0	0	0	0	0	0.00026194	0.00031225	0.00022674	0.00031685	0.000279445	14	18	12	18	15.5
DDX23	Probable ATP-dependent RNA helicase DDX23 OS=Homo sapiens GN=DDX23 PE=1 SV=3	0	1.35699e-05	0	0	0	0	0	0	0	0	0	0	0.00019869	0.00018422	0.00020066	0.0001402	0.000180942	4	4	4	3	3.75
TMPO	Lamina-associated polypeptide 2, isoform alpha OS=Homo sapiens GN=TMPO PE=1 SV=2	0	1.35773e-05	0	0	0	0	0	0	0	0	0	0	0.00023477	0.00021767	0.00023709	0.00016565	0.000213795	4	4	4	3	3.75
NOP2	Probable 28S rRNA (cytosine(4447)-C(5))-methyltransferase OS=Homo sapiens GN=NOP2 PE=1 SV=2	0	1.54681e-05	0	0	0	0	0	0	0	0	0	0	0.0008026	0.00055811	0.00065856	0.00061351	0.000658195	16	12	13	13	13.5
RPL14	60S ribosomal protein L14 OS=Homo sapiens GN=RPL14 PE=1 SV=4	0	1.55386e-05	0	0	0	0	0	0	0	0	0	0	0.002084	0.0014052	0.0017219	0.0017824	0.00174837	11	8	9	10	9.5
RPL7A	60S ribosomal protein L7a OS=Homo sapiens GN=RPL7A PE=1 SV=2	0	1.60196e-05	0	0	0	0	0	0	0	0	0	0	0.0030626	0.0022716	0.0024743	0.0031694	0.00274447	20	16	16	22	18.5
PRPF4B	Serine/threonine-protein kinase PRP4 homolog OS=Homo sapiens GN=PRPF4B PE=1 SV=3	0	1.60745e-05	0	0	0	0	0	0	0	0	0	0	0.0001618	0.00022502	0.00016339	0.00019027	0.00018512	4	6	4	5	4.75
LYAR	Cell growth-regulating nucleolar protein OS=Homo sapiens GN=LYAR PE=1 SV=2	0	1.67905e-05	0	0	0	0	0	0	0	0	0	0	0.00096725	0.00069751	0.00086827	0.00070777	0.0008102	9	7	8	7	7.75
TAF6	Transcription initiation factor TFIID subunit 6 OS=Homo sapiens GN=TAF6 PE=1 SV=1	0	1.68473e-05	0	0	0	0	0	0	0	0	0	0	0.00072198	0.00061362	0.00072912	0.00050943	0.000643537	12	11	12	9	11
RPS3	40S ribosomal protein S3 OS=Homo sapiens GN=RPS3 PE=1 SV=2	0	1.70996e-05	0	0	0	0	0	0	0	0	0	0	0.0026819	0.0024866	0.003047	0.0020501	0.0025664	16	16	18	13	15.75
ACTN4	Alpha-actinin-4 OS=Homo sapiens GN=ACTN4 PE=1 SV=2	0	1.82459e-05	0	0	0	0	0	0	0	0	0	0	0.00013413	0.00012436	9.0306e-05	0.00012619	0.000118747	3	3	2	3	2.75
PALD1	Paladin OS=Homo sapiens GN=PALD1 PE=1 SV=3	0	1.82499e-05	0	0	0	0	0	0	0	0	0	0	0.00014275	0.00013236	9.6109e-05	0.0001343	0.00012638	3	3	2	3	2.75
TADA1	Transcriptional adapter 1 OS=Homo sapiens GN=TADA1 PE=1 SV=1	0	1.82503e-05	0	0	0	0	0	0	0	0	0	0	0.00036476	0.0003382	0.00024558	0.00034317	0.000322927	3	3	2	3	2.75
CUL4B	Cullin-4B OS=Homo sapiens GN=CUL4B PE=1 SV=4	0	1.82549e-05	0	0	0	0	0	0	0	0	0	0	0.00013384	0.00012409	9.0108e-05	0.00012592	0.00011849	3	3	2	3	2.75
ENAH	Protein enabled homolog OS=Homo sapiens GN=ENAH PE=1 SV=2	0	1.82566e-05	0	0	0	0	0	0	0	0	0	0	0.00020676	0.0001917	0.0001392	0.00019452	0.000183045	3	3	2	3	2.75
USP24	Ubiquitin carboxyl-terminal hydrolase 24 OS=Homo sapiens GN=USP24 PE=1 SV=3	0	1.83937e-05	0	0	0	0	0	0	0	0	0	0	6.2186e-05	5.7657e-05	4.7101e-05	4.3879e-05	5.27058e-05	4	4	3	3	3.5
MCM4	DNA replication licensing factor MCM4 OS=Homo sapiens GN=MCM4 PE=1 SV=5	0	1.84117e-05	0	0	0	0	0	0	0	0	0	0	0.00066077	0.00065641	0.00047664	0.00071047	0.000626072	14	15	10	16	13.75
PHF5A	PHD finger-like domain-containing protein 5A OS=Homo sapiens GN=PHF5A PE=1 SV=1	0	1.84136e-05	0	0	0	0	0	0	0	0	0	0	0.0014812	0.0013733	0.0011218	0.0010451	0.00125535	4	4	3	3	3.5
OSBPL11	Oxysterol-binding protein-related protein 11 OS=Homo sapiens GN=OSBPL11 PE=1 SV=2	0	1.88179e-05	0	0	0	0	0	0	0	0	0	0	0.00038169	0.00030334	0.0003304	0.0002565	0.000317982	7	6	6	5	6
RPL11	60S ribosomal protein L11 OS=Homo sapiens GN=RPL11 PE=1 SV=2	0	1.88245e-05	0	0	0	0	0	0	0	0	0	0	0.0016018	0.001273	0.0013866	0.0010764	0.00133445	7	6	6	5	6
COPA	Coatomer subunit alpha OS=Homo sapiens GN=COPA PE=1 SV=2	0	1.90562e-05	0	0	0	0	0	0	0	0	0	0	0.000599	0.00049367	0.00043689	0.00062616	0.00053893	18	16	13	20	16.75
STIP1	Stress-induced-phosphoprotein 1 OS=Homo sapiens GN=STIP1 PE=1 SV=1	0	1.94389e-05	0	0	0	0	0	0	0	0	0	0	0.00082514	0.00083459	0.0011363	0.00084687	0.000910725	11	12	15	12	12.5
RPL13	60S ribosomal protein L13 OS=Homo sapiens GN=RPL13 PE=1 SV=4	0	1.94951e-05	0	0	0	0	0	0	0	0	0	0	0.0013513	0.0016108	0.0015596	0.0019978	0.00162988	7	9	8	11	8.75
CAMSAP1	Calmodulin-regulated spectrin-associated protein 1 OS=Homo sapiens GN=CAMSAP1 PE=1 SV=2	0	2.04507e-05	0	0	0	0	0	0	0	0	0	0	0.00030511	0.00037718	0.00025677	0.00028705	0.000306528	12	16	10	12	12.5
ERCC4	DNA repair endonuclease XPF OS=Homo sapiens GN=ERCC4 PE=1 SV=3	0	2.0686e-05	0	0	0	0	0	0	0	0	0	0	0.00035574	0.00037106	0.00035925	0.00025101	0.000334265	8	9	8	6	7.75
XRCC6	X-ray repair cross-complementing protein 6 OS=Homo sapiens GN=XRCC6 PE=1 SV=2	0	2.07553e-05	0	0	0	0	0	0	0	0	0	0	0.00046818	0.00062012	0.00054035	0.00069216	0.000580202	7	10	8	11	9
TMF1	TATA element modulatory factor OS=Homo sapiens GN=TMF1 PE=1 SV=2	0	2.23314e-05	0	0	0	0	0	0	0	0	0	0	0.00070806	0.00055283	0.00060215	0.00080638	0.000667355	19	16	16	23	18.5
C7orf50	Uncharacterized protein C7orf50 OS=Homo sapiens GN=C7orf50 PE=1 SV=1	0	2.27532e-05	0	0	0	0	0	0	0	0	0	0	0.00062988	0.00077867	0.00084813	0.00059259	0.000712318	3	4	4	3	3.5
THRAP3	Thyroid hormone receptor-associated protein 3 OS=Homo sapiens GN=THRAP3 PE=1 SV=2	0	2.27585e-05	0	0	0	0	0	0	0	0	0	0	0.00012795	0.00015818	0.00017229	0.00012038	0.0001447	3	4	4	3	3.5
FERMT2	Fermitin family homolog 2 OS=Homo sapiens GN=FERMT2 PE=1 SV=1	0	2.27622e-05	0	0	0	0	0	0	0	0	0	0	0.0001797	0.00022215	0.00024197	0.00016906	0.00020322	3	4	4	3	3.5
MTMR4	Myotubularin-related protein 4 OS=Homo sapiens GN=MTMR4 PE=1 SV=2	0	2.28489e-05	0	0	0	0	0	0	0	0	0	0	6.8171e-05	9.4809e-05	0.00010327	9.6203e-05	9.06132e-05	2	3	3	3	2.75
LARP7	La-related protein 7 OS=Homo sapiens GN=LARP7 PE=1 SV=1	0	2.28497e-05	0	0	0	0	0	0	0	0	0	0	0.00027994	0.00038933	0.00042407	0.00039506	0.0003721	4	6	6	6	5.5
CCDC88A	Girdin OS=Homo sapiens GN=CCDC88A PE=1 SV=2	0	2.35916e-05	0	0	0	0	0	0	0	0	0	0	0.00054425	0.00072665	0.00052765	0.00071685	0.00062885	25	36	24	35	30
ECD	Protein ecdysoneless homolog OS=Homo sapiens GN=ECD PE=1 SV=1	0	2.36305e-05	0	0	0	0	0	0	0	0	0	0	0.00025299	0.00017593	0.00019162	0.00023802	0.00021464	4	3	3	4	3.5
RPL32	60S ribosomal protein L32 OS=Homo sapiens GN=RPL32 PE=1 SV=2	0	2.36414e-05	0	0	0	0	0	0	0	0	0	0	0.0012069	0.00083923	0.0009141	0.0011354	0.00102391	4	3	3	4	3.5
NUP93	Nuclear pore complex protein Nup93 OS=Homo sapiens GN=NUP93 PE=1 SV=2	0	2.36506e-05	0	0	0	0	0	0	0	0	0	0	0.00019894	0.00013833	0.00015068	0.00018716	0.000168777	4	3	3	4	3.5
HSPH1	Heat shock protein 105 kDa OS=Homo sapiens GN=HSPH1 PE=1 SV=1	0	2.43577e-05	0	0	0	0	0	0	0	0	0	0	0.00018989	0.00022008	0.00014383	0.00017865	0.000183113	4	5	3	4	4
POLR2B	DNA-directed RNA polymerase II subunit RPB2 OS=Homo sapiens GN=POLR2B PE=1 SV=1	0	2.44845e-05	0	0	0	0	0	0	0	0	0	0	0.00020817	0.00022518	0.00021023	0.00029377	0.000234337	6	7	6	9	7
RSL1D1	Ribosomal L1 domain-containing protein 1 OS=Homo sapiens GN=RSL1D1 PE=1 SV=3	0	2.47246e-05	0	0	0	0	0	0	0	0	0	0	0.00099752	0.0011561	0.0014271	0.0010167	0.00114935	12	15	17	13	14.25
DDX20	Probable ATP-dependent RNA helicase DDX20 OS=Homo sapiens GN=DDX20 PE=1 SV=2	0	2.65372e-05	0	0	0	0	0	0	0	0	0	0	0.00049432	0.00032082	0.00039936	0.00041855	0.000408263	10	7	8	9	8.5
DHX15	Pre-mRNA-splicing factor ATP-dependent RNA helicase DHX15 OS=Homo sapiens GN=DHX15 PE=1 SV=2	0	2.6783e-05	0	0	0	0	0	0	0	0	0	0	0.00061482	0.00061755	0.00046567	0.00072303	0.000605267	12	13	9	15	12.25
DHX38	Pre-mRNA-splicing factor ATP-dependent RNA helicase PRP16 OS=Homo sapiens GN=DHX38 PE=1 SV=2	0	2.77493e-05	0	0	0	0	0	0	0	0	0	0	9.9589e-05	0.00015389	0.0001341	0.00012492	0.000128125	3	5	4	4	4
XRCC5	X-ray repair cross-complementing protein 5 OS=Homo sapiens GN=XRCC5 PE=1 SV=3	0	2.78948e-05	0	0	0	0	0	0	0	0	0	0	0.00044516	0.00030955	0.00044956	0.00047116	0.000418857	8	6	8	9	7.75
RPS3A	40S ribosomal protein S3a OS=Homo sapiens GN=RPS3A PE=1 SV=2	0	2.85758e-05	0	0	0	0	0	0	0	0	0	0	0.0026229	0.0020027	0.0023372	0.0017419	0.00217618	17	14	15	12	14.5
ARMC8	Armadillo repeat-containing protein 8 OS=Homo sapiens GN=ARMC8 PE=1 SV=2	0	2.86851e-05	0	0	0	0	0	0	0	0	0	0	0.00018157	0.00016835	0.00024448	0.00022776	0.00020554	3	3	4	4	3.5
BCCIP	BRCA2 and CDKN1A-interacting protein OS=Homo sapiens GN=BCCIP PE=1 SV=1	0	3.02556e-05	0	0	0	0	0	0	0	0	0	0	0.0014269	0.0012027	0.001179	0.0017086	0.0013793	11	10	9	14	11
NUP153	Nuclear pore complex protein Nup153 OS=Homo sapiens GN=NUP153 PE=1 SV=2	0	3.02964e-05	0	0	0	0	0	0	0	0	0	0	0.00091129	0.00061449	0.00080875	0.00093529	0.000817455	33	24	29	36	30.5
PSMC3	26S proteasome regulatory subunit 6A OS=Homo sapiens GN=PSMC3 PE=1 SV=3	0	3.05113e-05	0	0	0	0	0	0	0	0	0	0	0.00083505	0.00060218	0.0006559	0.00087291	0.00074151	9	7	7	10	8.25
DHX9	ATP-dependent RNA helicase A OS=Homo sapiens GN=DHX9 PE=1 SV=4	0	3.0772e-05	0	0	0	0	0	0	0	0	0	0	0.00080181	0.00056499	0.00074495	0.0005733	0.000671263	25	19	23	19	21.5
COPS7A	COP9 signalosome complex subunit 7a OS=Homo sapiens GN=COPS7A PE=1 SV=1	0	3.10677e-05	0	0	0	0	0	0	0	0	0	0	0.00074058	0.00082397	0.00089748	0.0011148	0.000894208	5	6	6	8	6.25
GOLGB1	Golgin subfamily B member 1 OS=Homo sapiens GN=GOLGB1 PE=1 SV=2	0	3.20269e-05	0	0	0	0	0	0	0	0	0	0	0.00016248	0.00020858	0.00020195	0.0001411	0.000178528	13	18	16	12	14.75
BUB1B	Mitotic checkpoint serine/threonine-protein kinase BUB1 beta OS=Homo sapiens GN=BUB1B PE=1 SV=3	0	3.26336e-05	0	0	0	0	0	0	0	0	0	0	0.00015517	0.0001079	0.00011753	0.00010949	0.000122522	4	3	3	3	3.25
NOL6	Nucleolar protein 6 OS=Homo sapiens GN=NOL6 PE=1 SV=2	0	3.26426e-05	0	0	0	0	0	0	0	0	0	0	0.00028434	0.00019772	0.00021536	0.00020063	0.000224513	8	6	6	6	6.5
SART1	U4/U6.U5 tri-snRNP-associated protein 1 OS=Homo sapiens GN=SART1 PE=1 SV=1	0	3.28892e-05	0	0	0	0	0	0	0	0	0	0	0.0003564	0.00028324	0.00025709	0.0002395	0.000284057	7	6	5	5	5.75
IFT52	Intraflagellar transport protein 52 homolog OS=Homo sapiens GN=IFT52 PE=1 SV=3	0	3.40528e-05	0	0	0	0	0	0	0	0	0	0	0.00046604	0.00051852	0.00037652	0.00035076	0.00042796	5	6	4	4	4.75
NEK9	Serine/threonine-protein kinase Nek9 OS=Homo sapiens GN=NEK9 PE=1 SV=2	0	3.53324e-05	0	0	0	0	0	0	0	0	0	0	0.00012482	0.0001543	0.00016807	0.00019571	0.000160725	3	4	4	5	4
CFDP1	Craniofacial development protein 1 OS=Homo sapiens GN=CFDP1 PE=1 SV=1	0	3.53466e-05	0	0	0	0	0	0	0	0	0	0	0.00040868	0.00050522	0.00055029	0.00064081	0.00052625	3	4	4	5	4
EXOSC2	Exosome complex component RRP4 OS=Homo sapiens GN=EXOSC2 PE=1 SV=2	0	3.53501e-05	0	0	0	0	0	0	0	0	0	0	0.00041705	0.00051557	0.00056156	0.00065394	0.00053703	3	4	4	5	4
KIAA1468	LisH domain and HEAT repeat-containing protein KIAA1468 OS=Homo sapiens GN=KIAA1468 PE=1 SV=2	0	3.54454e-05	0	0	0	0	0	0	0	0	0	0	0.00033497	0.0002174	0.00027062	0.00025211	0.000268775	10	7	8	8	8.25
HDAC3	Histone deacetylase 3 OS=Homo sapiens GN=HDAC3 PE=1 SV=2	0	3.74748e-05	0	0	0	0	0	0	0	0	0	0	0.00085651	0.0011471	0.00076887	0.0010744	0.00096172	9	13	8	12	10.5
TP53	Cellular tumor antigen p53 OS=Homo sapiens GN=TP53 PE=1 SV=4	0	4.01806e-05	0	0	0	0	0	0	0	0	0	0	0.0024874	0.0036516	0.002512	0.0030228	0.00291845	24	38	24	31	29.25
DDX41	Probable ATP-dependent RNA helicase DDX41 OS=Homo sapiens GN=DDX41 PE=1 SV=2	0	4.03193e-05	0	0	0	0	0	0	0	0	0	0	0.00019646	0.00018215	0.00026453	0.00018483	0.000206993	3	3	4	3	3.25
KNL1	Kinetochore scaffold 1 OS=Homo sapiens GN=KNL1 PE=1 SV=3	0	4.11105e-05	0	0	0	0	0	0	0	0	0	0	0.00083481	0.0011771	0.00086063	0.0011781	0.00101266	48	73	49	72	60.5
OFD1	Oral-facial-digital syndrome 1 protein OS=Homo sapiens GN=OFD1 PE=1 SV=1	0	4.27629e-05	0	0	0	0	0	0	0	0	0	0	8.0498e-05	0.00011195	8.1293e-05	7.5733e-05	8.73685e-05	2	3	2	2	2.25
DPY30	Protein dpy-30 homolog OS=Homo sapiens GN=DPY30 PE=1 SV=1	0	4.27642e-05	0	0	0	0	0	0	0	0	0	0	0.0016457	0.0019073	0.0012465	0.0019354	0.00168373	4	5	3	5	4.25
TSR1	Pre-rRNA-processing protein TSR1 homolog OS=Homo sapiens GN=TSR1 PE=1 SV=1	0	4.27742e-05	0	0	0	0	0	0	0	0	0	0	0.00020265	0.00028183	0.00020465	0.00019065	0.000219945	4	6	4	4	4.5
PSMD6	26S proteasome non-ATPase regulatory subunit 6 OS=Homo sapiens GN=PSMD6 PE=1 SV=1	0	4.27819e-05	0	0	0	0	0	0	0	0	0	0	0.00020942	0.00029125	0.00021149	0.00019702	0.000227295	2	3	2	2	2.25
BORCS6	BLOC-1-related complex subunit 6 OS=Homo sapiens GN=BORCS6 PE=1 SV=2	0	4.27892e-05	0	0	0	0	0	0	0	0	0	0	0.00022819	0.00031736	0.00023045	0.00021468	0.00024767	2	3	2	2	2.25
EPB41L3	Band 4.1-like protein 3 OS=Homo sapiens GN=EPB41L3 PE=1 SV=2	0	4.32335e-05	0	0	0	0	0	0	0	0	0	0	0.0009368	0.00076434	0.00090821	0.0011986	0.000951988	27	24	26	36	28.25
CCAR1	Cell division cycle and apoptosis regulator protein 1 OS=Homo sapiens GN=CCAR1 PE=1 SV=2	0	4.35022e-05	0	0	0	0	0	0	0	0	0	0	7.0838e-05	9.8518e-05	7.1538e-05	9.9967e-05	8.52153e-05	2	3	2	3	2.5
NSFL1C	NSFL1 cofactor p47 OS=Homo sapiens GN=NSFL1C PE=1 SV=2	0	4.35612e-05	0	0	0	0	0	0	0	0	0	0	0.001321	0.0012248	0.0012229	0.00082856	0.00114931	12	12	11	8	10.75
FXR1	Fragile X mental retardation syndrome-related protein 1 OS=Homo sapiens GN=FXR1 PE=1 SV=3	0	4.36488e-05	0	0	0	0	0	0	0	0	0	0	0.00078709	0.00072977	0.0010598	0.001049	0.000906415	12	12	16	17	14.25
NCOR1	Nuclear receptor corepressor 1 OS=Homo sapiens GN=NCOR1 PE=1 SV=2	0	4.36634e-05	0	0	0	0	0	0	0	0	0	0	0.00045072	0.00044885	0.00032031	0.00051827	0.000434537	27	29	19	33	27
DDX21	Nucleolar RNA helicase 2 OS=Homo sapiens GN=DDX21 PE=1 SV=5	0	4.43347e-05	0	0	0	0	0	0	0	0	0	0	0.0020288	0.0015434	0.0021539	0.0014682	0.00179857	39	32	41	30	35.5
CCP110	Centriolar coiled-coil protein of 110 kDa OS=Homo sapiens GN=CCP110 PE=1 SV=3	0	4.4714e-05	0	0	0	0	0	0	0	0	0	0	0.00048299	0.00070903	0.00052841	0.00049226	0.000553172	12	19	13	13	14.25
SHTN1	Shootin-1 OS=Homo sapiens GN=SHTN1 PE=1 SV=4	0	4.69564e-05	0	0	0	0	0	0	0	0	0	0	0.00058096	0.0004788	0.00039114	0.0006073	0.00051455	9	8	6	10	8.25
CD2BP2	CD2 antigen cytoplasmic tail-binding protein 2 OS=Homo sapiens GN=CD2BP2 PE=1 SV=1	0	4.71053e-05	0	0	0	0	0	0	0	0	0	0	0.00059724	0.000443	0.00048252	0.00067427	0.000549257	5	4	4	6	4.75
COPS5	COP9 signalosome complex subunit 5 OS=Homo sapiens GN=COPS5 PE=1 SV=4	0	4.71108e-05	0	0	0	0	0	0	0	0	0	0	0.00060976	0.00045228	0.00049263	0.0006884	0.000560767	5	4	4	6	4.75
RBL1	Retinoblastoma-like protein 1 OS=Homo sapiens GN=RBL1 PE=1 SV=3	0	4.76796e-05	0	0	0	0	0	0	0	0	0	0	0.00030511	0.00024753	0.00030812	0.00039469	0.000313862	8	7	8	11	8.5
EIF5B	Eukaryotic translation initiation factor 5B OS=Homo sapiens GN=EIF5B PE=1 SV=4	0	5.07054e-05	0	0	0	0	0	0	0	0	0	0	0.00026709	0.00018573	0.00030345	0.00025128	0.000251887	8	6	9	8	7.75
HAUS2	HAUS augmin-like complex subunit 2 OS=Homo sapiens GN=HAUS2 PE=1 SV=1	0	5.13574e-05	0	0	0	0	0	0	0	0	0	0	0.00086664	0.0012856	0.0008752	0.0009784	0.00100146	5	8	5	6	6
PPP4R3A	Serine/threonine-protein phosphatase 4 regulatory subunit 3A OS=Homo sapiens GN=PPP4R3A PE=1 SV=1	0	5.1902e-05	0	0	0	0	0	0	0	0	0	0	0.00019559	0.00031736	0.00029629	0.00027602	0.000271315	4	7	6	6	5.75
NOP56	Nucleolar protein 56 OS=Homo sapiens GN=NOP56 PE=1 SV=4	0	5.19537e-05	0	0	0	0	0	0	0	0	0	0	0.00082287	0.00063578	0.00062325	0.0005161	0.0006495	12	10	9	8	9.75
CEP350	Centrosome-associated protein 350 OS=Homo sapiens GN=CEP350 PE=1 SV=1	0	5.23526e-05	0	0	0	0	0	0	0	0	0	0	0.00018295	0.00027867	0.00021115	0.00027047	0.00023581	14	23	16	22	18.75
NONO	Non-POU domain-containing octamer-binding protein OS=Homo sapiens GN=NONO PE=1 SV=4	0	5.41869e-05	0	0	0	0	0	0	0	0	0	0	0.00034592	0.00056127	0.00043667	0.00048816	0.000458005	4	7	5	6	5.5
ZFP1	Zinc finger protein 1 homolog OS=Homo sapiens GN=ZFP1 PE=1 SV=2	0	5.41976e-05	0	0	0	0	0	0	0	0	0	0	0.00090071	0.0013918	0.0014149	0.0014123	0.00127993	9	15	14	15	13.25
RPS6	40S ribosomal protein S6 OS=Homo sapiens GN=RPS6 PE=1 SV=1	0	5.42002e-05	0	0	0	0	0	0	0	0	0	0	0.00065433	0.0010617	0.00082599	0.00092339	0.000866352	4	7	5	6	5.5
RPL5	60S ribosomal protein L5 OS=Homo sapiens GN=RPL5 PE=1 SV=3	0	5.4695e-05	0	0	0	0	0	0	0	0	0	0	0.0013714	0.001653	0.0012465	0.0019354	0.00155158	10	13	9	15	11.75
NUFIP2	Nuclear fragile X mental retardation-interacting protein 2 OS=Homo sapiens GN=NUFIP2 PE=1 SV=1	0	5.95151e-05	0	0	0	0	0	0	0	0	0	0	0.00023443	0.00032603	0.00035512	0.00038596	0.000325385	4	6	6	7	5.75
SMC4	Structural maintenance of chromosomes protein 4 OS=Homo sapiens GN=SMC4 PE=1 SV=2	0	6.06844e-05	0	0	0	0	0	0	0	0	0	0	0.00025299	0.00038117	0.00025549	0.00029752	0.000296792	8	13	8	10	9.75
RIC8A	Synembryn-A OS=Homo sapiens GN=RIC8A PE=1 SV=3	0	6.07141e-05	0	0	0	0	0	0	0	0	0	0	0.00015342	0.00014224	0.00015493	0.0002165	0.000166772	2	2	2	3	2.25
BRCA1	Breast cancer type 1 susceptibility protein OS=Homo sapiens GN=BRCA1 PE=1 SV=2	0	6.07141e-05	0	0	0	0	0	0	0	0	0	0	4.3727e-05	4.0543e-05	4.4159e-05	6.1708e-05	4.75342e-05	2	2	2	3	2.25
ACIN1	Apoptotic chromatin condensation inducer in the nucleus OS=Homo sapiens GN=ACIN1 PE=1 SV=2	0	6.07193e-05	0	0	0	0	0	0	0	0	0	0	6.0749e-05	5.6324e-05	6.1349e-05	8.5729e-05	6.60378e-05	2	2	2	3	2.25
RPL21	60S ribosomal protein L21 OS=Homo sapiens GN=RPL21 PE=1 SV=2	0	6.07896e-05	0	0	0	0	0	0	0	0	0	0	0.00076372	0.0007081	0.00077127	0.00047901	0.000680525	3	3	3	2	2.75
RAD50	DNA repair protein RAD50 OS=Homo sapiens GN=RAD50 PE=1 SV=1	0	6.14006e-05	0	0	0	0	0	0	0	0	0	0	0.0011176	0.00080597	0.00087787	0.00070099	0.000875607	36	28	28	24	29
EIF3D	Eukaryotic translation initiation factor 3 subunit D OS=Homo sapiens GN=EIF3D PE=1 SV=1	0	6.14469e-05	0	0	0	0	0	0	0	0	0	0	0.00066896	0.0004824	0.00052544	0.00041957	0.000524093	9	7	7	6	7.25
GAK	Cyclin-G-associated kinase OS=Homo sapiens GN=GAK PE=1 SV=2	0	6.63013e-05	0	0	0	0	0	0	0	0	0	0	0.00015535	0.00014403	9.4129e-05	0.00014615	0.000134915	5	5	3	5	4.5
KPNA4	Importin subunit alpha-3 OS=Homo sapiens GN=KPNA4 PE=1 SV=1	0	6.89927e-05	0	0	0	0	0	0	0	0	0	0	0.00031272	0.00021746	0.00031581	0.00022066	0.000266662	4	3	4	3	3.5
RPS9	40S ribosomal protein S9 OS=Homo sapiens GN=RPS9 PE=1 SV=3	0	6.90026e-05	0	0	0	0	0	0	0	0	0	0	0.00083983	0.000584	0.00084813	0.00059259	0.000716137	4	3	4	3	3.5
GTF3C4	General transcription factor 3C polypeptide 4 OS=Homo sapiens GN=GTF3C4 PE=1 SV=2	0	6.90037e-05	0	0	0	0	0	0	0	0	0	0	0.00019821	0.00013783	0.00020017	0.00013986	0.000169018	4	3	4	3	3.5
CDR2L	Cerebellar degeneration-related protein 2-like OS=Homo sapiens GN=CDR2L PE=1 SV=2	0	7.14245e-05	0	0	0	0	0	0	0	0	0	0	0.00078836	0.00097459	0.00079615	0.00057687	0.000783993	9	12	9	7	9.25
AKAP8	A-kinase anchor protein 8 OS=Homo sapiens GN=AKAP8 PE=1 SV=1	0	7.80516e-05	0	0	0	0	0	0	0	0	0	0	0.00017658	0.00027287	0.00029721	0.00027688	0.000255885	3	5	5	5	4.5
PLEC	Plectin OS=Homo sapiens GN=PLEC PE=1 SV=3	0	8.03404e-05	0	0	0	0	0	0	0	0	0	0	7.8264e-05	4.8376e-05	7.9037e-05	6.545e-05	6.77817e-05	10	6	9	9	8.5
WDR70	WD repeat-containing protein 70 OS=Homo sapiens GN=WDR70 PE=1 SV=1	0	8.15971e-05	0	0	0	0	0	0	0	0	0	0	0.00031141	0.00040422	0.00044028	0.00052735	0.000420815	5	7	7	9	7
UBR5	E3 ubiquitin-protein ligase UBR5 OS=Homo sapiens GN=UBR5 PE=1 SV=2	0	8.30184e-05	0	0	0	0	0	0	0	0	0	0	0.00037836	0.00045874	0.00027923	0.0004518	0.000392033	26	34	19	33	28
NSUN2	tRNA (cytosine(34)-C(5))-methyltransferase OS=Homo sapiens GN=NSUN2 PE=1 SV=2	0	8.33688e-05	0	0	0	0	0	0	0	0	0	0	0.00058416	0.00049238	0.00042904	0.00069947	0.000551263	11	10	8	14	10.75
HAT1	Histone acetyltransferase type B catalytic subunit OS=Homo sapiens GN=HAT1 PE=1 SV=1	0	8.37686e-05	0	0	0	0	0	0	0	0	0	0	0.00058327	0.00081119	0.00049086	0.0006402	0.00063138	6	9	5	7	6.75
NANS	Sialic acid synthase OS=Homo sapiens GN=NANS PE=1 SV=2	0	8.46786e-05	0	0	0	0	0	0	0	0	0	0	0.00034038	0.00052598	0.00034374	0.00042697	0.000409268	3	5	3	4	3.75
PTBP1	Polypyrimidine tract-binding protein 1 OS=Homo sapiens GN=PTBP1 PE=1 SV=1	0	9.22568e-05	0	0	0	0	0	0	0	0	0	0	0.00030683	0.00035561	0.00038733	0.00050517	0.000388735	4	5	5	7	5.25
WDR44	WD repeat-containing protein 44 OS=Homo sapiens GN=WDR44 PE=1 SV=1	0	9.23316e-05	0	0	0	0	0	0	0	0	0	0	0.00026768	0.00037228	0.00036043	0.0004617	0.000365522	6	9	8	11	8.5
GPS1	COP9 signalosome complex subunit 1 OS=Homo sapiens GN=GPS1 PE=1 SV=4	0	9.29362e-05	0	0	0	0	0	0	0	0	0	0	0.00066366	0.00069224	0.00041888	0.00070242	0.0006193	8	9	5	9	7.75
POLA2	DNA polymerase alpha subunit B OS=Homo sapiens GN=POLA2 PE=1 SV=2	0	9.34016e-05	0	0	0	0	0	0	0	0	0	0	0.0004768	0.00037892	0.00027515	0.00038449	0.00037884	7	6	4	6	5.75
MRE11	Double-strand break repair protein MRE11 OS=Homo sapiens GN=MRE11 PE=1 SV=3	0	9.95229e-05	0	0	0	0	0	0	0	0	0	0	0.0012082	0.00074677	0.00098769	0.00081188	0.000938635	21	14	17	15	16.75
ILF2	Interleukin enhancer-binding factor 2 OS=Homo sapiens GN=ILF2 PE=1 SV=2	0	0.000100808	0	0	0	0	0	0	0	0	0	0	0.0010444	0.00067784	0.00073831	0.00068781	0.00078709	10	7	7	7	7.75
XRN2	5'-3' exoribonuclease 2 OS=Homo sapiens GN=XRN2 PE=1 SV=1	0	0.000100824	0	0	0	0	0	0	0	0	0	0	0.00025725	0.00015901	0.0002598	0.00020169	0.000219438	6	4	6	5	5.25
RPS18	40S ribosomal protein S18 OS=Homo sapiens GN=RPS18 PE=1 SV=3	0	0.000101433	0	0	0	0	0	0	0	0	0	0	0.0016078	0.0017392	0.002165	0.0012606	0.00169315	6	7	8	5	6.5
MGEA5	Protein O-GlcNAcase OS=Homo sapiens GN=MGEA5 PE=1 SV=2	0	0.000102843	0	0	0	0	0	0	0	0	0	0	0.0001334	0.00016491	0.00013472	0.00020917	0.00016055	3	4	3	5	3.75
HDAC2	Histone deacetylase 2 OS=Homo sapiens GN=HDAC2 PE=1 SV=2	0	0.000105954	0	0	0	0	0	0	0	0	0	0	0.00058427	0.00038694	0.00067434	0.00062821	0.00056844	8	8	9	9	8.5
IPO8	Importin-8 OS=Homo sapiens GN=IPO8 PE=1 SV=2	0	0.000106873	0	0	0	0	0	0	0	0	0	0	0.00039279	0.00069194	0.00055533	0.00059126	0.00055783	10	19	14	16	14.75
WASH2P	WAS protein family homolog 2 OS=Homo sapiens GN=WASH2P PE=2 SV=2	0	0.000107499	0	0	0	0	0	0	0	0	0	0	0.00043798	0.00056851	0.00053077	0.00074169	0.000569738	5	7	6	9	6.75
KNSTRN	Small kinetochore-associated protein OS=Homo sapiens GN=KNSTRN PE=1 SV=2	0	0.000109303	0	0	0	0	0	0	0	0	0	0	0.00090229	0.00083658	0.00052069	0.00072761	0.000746792	7	7	4	6	6
NARS	Asparagine--tRNA ligase, cytoplasmic OS=Homo sapiens GN=NARS PE=1 SV=1	0	0.000109306	0	0	0	0	0	0	0	0	0	0	0.0005203	0.0004824	0.00030025	0.00041957	0.00043063	7	7	4	6	6
UBE2I	SUMO-conjugating enzyme UBC9 OS=Homo sapiens GN=UBE2I PE=1 SV=1	0	0.000114474	0	0	0	0	0	0	0	0	0	0	0.0015468	0.0016732	0.0013017	0.00097015	0.00137296	6	7	5	4	5.5
RPL9	60S ribosomal protein L9 OS=Homo sapiens GN=RPL9 PE=1 SV=1	0	0.000120739	0	0	0	0	0	0	0	0	0	0	0.001485	0.0013769	0.0021424	0.0013971	0.00160035	7	7	10	7	7.75
EXOSC6	Exosome complex component MTR3 OS=Homo sapiens GN=EXOSC6 PE=1 SV=1	0	0.000122865	0	0	0	0	0	0	0	0	0	0	0.00044925	0.00041653	0.00030246	0.00028177	0.000362503	3	3	2	2	2.5
STAT3	Signal transducer and activator of transcription 3 OS=Homo sapiens GN=STAT3 PE=1 SV=2	0	0.000128803	0	0	0	0	0	0	0	0	0	0	0.00063478	0.0011281	0.001015	0.00089581	0.000918422	12	23	19	18	18
KPNA6	Importin subunit alpha-7 OS=Homo sapiens GN=KPNA6 PE=1 SV=1	0	0.000129742	0	0	0	0	0	0	0	0	0	0	0.00075992	0.00098641	0.0012279	0.00078643	0.000940165	10	14	16	11	12.75
AHCTF1	Protein ELYS OS=Homo sapiens GN=AHCTF1 PE=1 SV=3	0	0.000130025	0	0	0	0	0	0	0	0	0	0	0.00010785	0.00015	9.0764e-05	0.00010147	0.000112521	6	9	5	6	6.5
SF3B6	Splicing factor 3B subunit 6 OS=Homo sapiens GN=SF3B6 PE=1 SV=1	0	0.000131118	0	0	0	0	0	0	0	0	0	0	0.0016293	0.0012085	0.0013163	0.0009197	0.00126845	5	4	4	3	4
STRN3	Striatin-3 OS=Homo sapiens GN=STRN3 PE=1 SV=3	0	0.000136955	0	0	0	0	0	0	0	0	0	0	0.00040885	0.00033169	0.00041289	0.00024041	0.00034846	10	9	10	7	9
SSB	Lupus La protein OS=Homo sapiens GN=SSB PE=1 SV=2	0	0.000141499	0	0	0	0	0	0	0	0	0	0	0.00079867	0.00083306	0.0012098	0.00075139	0.00089823	8	9	12	8	9.25
WDR45	WD repeat domain phosphoinositide-interacting protein 4 OS=Homo sapiens GN=WDR45 PE=1 SV=1	0	0.000141563	0	0	0	0	0	0	0	0	0	0	0.0011314	0.00062942	0.0009141	0.00085157	0.000881623	10	6	8	8	8
PRIM2	DNA primase large subunit OS=Homo sapiens GN=PRIM2 PE=1 SV=2	0	0.000141597	0	0	0	0	0	0	0	0	0	0	0.00040012	0.00022259	0.00032326	0.00030115	0.00031178	5	3	4	4	4
PER1	Period circadian protein homolog 1 OS=Homo sapiens GN=PER1 PE=1 SV=2	0	0.000142059	0	0	0	0	0	0	0	0	0	0	0.00044205	0.00052696	0.00038265	0.00065353	0.000501298	14	18	12	22	16.5
NCAPH	Condensin complex subunit 2 OS=Homo sapiens GN=NCAPH PE=1 SV=3	0	0.000145431	0	0	0	0	0	0	0	0	0	0	0.00060466	0.00096834	0.00061063	0.00082744	0.000752768	11	19	11	16	14.25
RPL19	60S ribosomal protein L19 OS=Homo sapiens GN=RPL19 PE=1 SV=1	0	0.000146139	0	0	0	0	0	0	0	0	0	0	0.00062345	0.00038536	0.00041974	0.00058654	0.000503772	3	2	2	3	2.5
PPAN	Suppressor of SWI4 1 homolog OS=Homo sapiens GN=PPAN PE=2 SV=1	0	0.000146159	0	0	0	0	0	0	0	0	0	0	0.00025834	0.00015968	0.00017393	0.00024305	0.00020875	3	2	2	3	2.5
POLD1	DNA polymerase delta catalytic subunit OS=Homo sapiens GN=POLD1 PE=1 SV=2	0	0.000153907	0	0	0	0	0	0	0	0	0	0	0.00029436	0.0004435	0.00026011	0.00034617	0.000336035	8	13	7	10	9.5
TP53BP2	Apoptosis-stimulating of p53 protein 2 OS=Homo sapiens GN=TP53BP2 PE=1 SV=2	0	0.000161275	0	0	0	0	0	0	0	0	0	0	0.00025277	0.00046872	0.00040113	0.00040767	0.000382572	7	14	11	12	11
RPS8	40S ribosomal protein S8 OS=Homo sapiens GN=RPS8 PE=1 SV=2	0	0.000162999	0	0	0	0	0	0	0	0	0	0	0.0015666	0.0018156	0.0025709	0.0016581	0.0019028	8	10	13	9	10
WAPL	Wings apart-like protein homolog OS=Homo sapiens GN=WAPL PE=1 SV=1	0	0.000163145	0	0	0	0	0	0	0	0	0	0	0.00030806	0.00038083	0.0002074	0.00028982	0.000296527	9	12	6	9	9
GATAD2B	Transcriptional repressor p66-beta OS=Homo sapiens GN=GATAD2B PE=1 SV=1	0	0.000163145	0	0	0	0	0	0	0	0	0	0	0.00020606	0.00025474	0.00013873	0.00019387	0.00019835	3	4	2	3	3
MATR3	Matrin-3 OS=Homo sapiens GN=MATR3 PE=1 SV=2	0	0.000163623	0	0	0	0	0	0	0	0	0	0	0.00028854	0.00049046	0.00033995	0.00045243	0.000392845	6	11	7	10	8.5
ADD3	Gamma-adducin OS=Homo sapiens GN=ADD3 PE=1 SV=1	0	0.000165934	0	0	0	0	0	0	0	0	0	0	0.00040386	0.00053492	0.00029132	0.00043423	0.000416083	7	10	5	8	7.5
KIAA1671	Uncharacterized protein KIAA1671 OS=Homo sapiens GN=KIAA1671 PE=1 SV=2	0	0.000167656	0	0	0	0	0	0	0	0	0	0	4.5107e-05	4.1822e-05	6.833e-05	6.3656e-05	5.47287e-05	2	2	3	3	2.5
FRYL	Protein furry homolog-like OS=Homo sapiens GN=FRYL PE=1 SV=2	0	0.000167658	0	0	0	0	0	0	0	0	0	0	2.7037e-05	2.5068e-05	4.0957e-05	3.8155e-05	3.28043e-05	2	2	3	3	2.5
TMX1	Thioredoxin-related transmembrane protein 1 OS=Homo sapiens GN=TMX1 PE=1 SV=1	0	0.000167667	0	0	0	0	0	0	0	0	0	0	0.00029094	0.00026975	0.00044073	0.00041058	0.000353	2	2	3	3	2.5
KHSRP	Far upstream element-binding protein 2 OS=Homo sapiens GN=KHSRP PE=1 SV=4	0	0.000174406	0	0	0	0	0	0	0	0	0	0	0.00028644	0.00026558	0.00017356	0.00032338	0.00026224	5	5	3	6	4.75
TACC3	Transforming acidic coiled-coil-containing protein 3 OS=Homo sapiens GN=TACC3 PE=1 SV=1	0	0.000176489	0	0	0	0	0	0	0	0	0	0	0.00034024	0.0002704	0.00029452	0.00045729	0.000340612	7	6	6	10	7.25
CNOT11	CCR4-NOT transcription complex subunit 11 OS=Homo sapiens GN=CNOT11 PE=1 SV=1	0	0.00017862	0	0	0	0	0	0	0	0	0	0	0.00031947	0.00051835	0.00032262	0.00045083	0.000402817	4	7	4	6	5.25
DDX5	Probable ATP-dependent RNA helicase DDX5 OS=Homo sapiens GN=DDX5 PE=1 SV=1	0	0.000182846	0	0	0	0	0	0	0	0	0	0	0.00046437	0.00043055	0.00040197	0.00024965	0.000386635	12	10	12	7	10.25
IGF2BP1	Insulin-like growth factor 2 mRNA-binding protein 1 OS=Homo sapiens GN=IGF2BP1 PE=1 SV=2	0	0.000184092	0	0	0	0	0	0	0	0	0	0	0.00063533	0.00039271	0.00057032	0.00039848	0.00049921	9	6	8	6	7.25
RPS13	40S ribosomal protein S13 OS=Homo sapiens GN=RPS13 PE=1 SV=2	0	0.000195736	0	0	0	0	0	0	0	0	0	0	0.00080924	0.00075031	0.0010897	0.0012689	0.000979538	3	3	4	5	3.75
CXXC1	CXXC-type zinc finger protein 1 OS=Homo sapiens GN=CXXC1 PE=1 SV=2	0	0.000200014	0	0	0	0	0	0	0	0	0	0	0.00037255	0.00023028	0.00025082	0.00023366	0.000271827	6	4	4	4	4.5
YWHAZ	14-3-3 protein zeta/delta OS=Homo sapiens GN=YWHAZ PE=1 SV=1	0	0.000200019	0	0	0	0	0	0	0	0	0	0	0.00049876	0.00030829	0.00033579	0.00031282	0.000363915	4	3	3	3	3.25
PPP2R3C	Serine/threonine-protein phosphatase 2A regulatory subunit B'' subunit gamma OS=Homo sapiens GN=PPP2R3C PE=1 SV=1	0	0.000200028	0	0	0	0	0	0	0	0	0	0	0.00026975	0.00016673	0.00018161	0.00016919	0.00019682	3	2	2	2	2.25
AP2B1	AP-2 complex subunit beta OS=Homo sapiens GN=AP2B1 PE=1 SV=1	0	0.000201771	0	0	0	0	0	0	0	0	0	0	0.000739	0.0008464	0.0004829	0.00089974	0.00074201	17	21	11	22	17.75
RPL3	60S ribosomal protein L3 OS=Homo sapiens GN=RPL3 PE=1 SV=2	0	0.000203714	0	0	0	0	0	0	0	0	0	0	0.0025268	0.0015931	0.0022456	0.0015214	0.00197172	25	17	22	16	20
CIC	Protein capicua homolog OS=Homo sapiens GN=CIC PE=1 SV=2	0	0.000204125	0	0	0	0	0	0	0	0	0	0	7.5992e-05	0.00014092	0.00010232	0.00011916	0.000109598	3	6	4	5	4.5
CHERP	Calcium homeostasis endoplasmic reticulum protein OS=Homo sapiens GN=CHERP PE=1 SV=3	0	0.000205846	0	0	0	0	0	0	0	0	0	0	0.00053361	0.00037106	0.00040416	0.00029284	0.000400417	12	9	9	7	9.25
RBBP5	Retinoblastoma-binding protein 5 OS=Homo sapiens GN=RBBP5 PE=1 SV=2	0	0.000209209	0	0	0	0	0	0	0	0	0	0	0.00015142	0.00021059	0.00022937	0.00028491	0.000219073	2	3	3	4	3
CDC42BPA	Serine/threonine-protein kinase MRCK alpha OS=Homo sapiens GN=CDC42BPA PE=1 SV=1	0	0.000209226	0	0	0	0	0	0	0	0	0	0	4.7035e-05	6.5414e-05	7.1249e-05	8.8501e-05	6.80497e-05	2	3	3	4	3
SQSTM1	Sequestosome-1 OS=Homo sapiens GN=SQSTM1 PE=1 SV=1	0	0.000214735	0	0	0	0	0	0	0	0	0	0	0.00037029	0.00042915	0.00037395	0.00060965	0.00044576	4	5	4	7	5
RBM17	Splicing factor 45 OS=Homo sapiens GN=RBM17 PE=1 SV=1	0	0.000221734	0	0	0	0	0	0	0	0	0	0	0.0004063	0.00047089	0.00030774	0.00057338	0.000439577	4	5	3	6	4.5
PRMT7	Protein arginine N-methyltransferase 7 OS=Homo sapiens GN=PRMT7 PE=1 SV=1	0	0.000226587	0	0	0	0	0	0	0	0	0	0	0.0010595	0.00054574	0.00089164	0.00088603	0.000845727	18	10	15	16	14.75
ADD1	Alpha-adducin OS=Homo sapiens GN=ADD1 PE=1 SV=2	0	0.000234522	0	0	0	0	0	0	0	0	0	0	0.00082901	0.00066615	0.00044651	0.00057195	0.000628405	15	13	8	11	11.75
NIP7	60S ribosome subunit biogenesis protein NIP7 homolog OS=Homo sapiens GN=NIP7 PE=1 SV=1	0	0.000235147	0	0	0	0	0	0	0	0	0	0	0.00090515	0.00083923	0.0013711	0.00085157	0.000991763	4	4	6	4	4.5
PPP2R5C	Serine/threonine-protein phosphatase 2A 56 kDa regulatory subunit gamma isoform OS=Homo sapiens GN=PPP2R5C PE=1 SV=3	0	0.000235228	0	0	0	0	0	0	0	0	0	0	0.00015547	0.00014414	0.0002355	0.00014626	0.000170342	2	2	3	2	2.25
SNU13	NHP2-like protein 1 OS=Homo sapiens GN=SNU13 PE=1 SV=3	0	0.000235257	0	0	0	0	0	0	0	0	0	0	0.00063644	0.00059008	0.00096409	0.00059876	0.000697343	2	2	3	2	2.25
PCMT1	Protein-L-isoaspartate(D-aspartate) O-methyltransferase OS=Homo sapiens GN=PCMT1 PE=1 SV=4	0	0.000235275	0	0	0	0	0	0	0	0	0	0	0.00035887	0.00033273	0.00054363	0.00033763	0.000393215	2	2	3	2	2.25
SF3B2	Splicing factor 3B subunit 2 OS=Homo sapiens GN=SF3B2 PE=1 SV=2	0	0.000237541	0	0	0	0	0	0	0	0	0	0	0.0008647	0.00054855	0.00087325	0.00055661	0.000710777	19	13	19	13	16
AKAP11	A-kinase anchor protein 11 OS=Homo sapiens GN=AKAP11 PE=1 SV=1	0	0.000239066	0	0	0	0	0	0	0	0	0	0	0.00036425	0.00051652	0.0002813	0.00046364	0.000406428	17	26	13	23	19.75
RPS14	40S ribosomal protein S14 OS=Homo sapiens GN=RPS14 PE=1 SV=3	0	0.000244063	0	0	0	0	0	0	0	0	0	0	0.001079	0.0020008	0.0019069	0.0020302	0.00175422	4	8	7	8	6.75
CLCC1	Chloride channel CLIC-like protein 1 OS=Homo sapiens GN=CLCC1 PE=1 SV=1	0	0.000251222	0	0	0	0	0	0	0	0	0	0	0.00066531	0.00047978	0.00052258	0.00034774	0.000503853	9	7	7	5	7
ZMYM1	Zinc finger MYM-type protein 1 OS=Homo sapiens GN=ZMYM1 PE=1 SV=1	0	0.000253572	0	0	0	0	0	0	0	0	0	0	0.00017834	0.00013228	0.0001801	0.00010067	0.000147848	5	4	5	3	4.25
ZFP82	Zinc finger protein 82 homolog OS=Homo sapiens GN=ZFP82 PE=1 SV=1	0	0.00025362	0	0	0	0	0	0	0	0	0	0	0.00038282	0.00028395	0.0003866	0.00021609	0.000317365	3	3	4	2	3
RANBP3	Ran-binding protein 3 OS=Homo sapiens GN=RANBP3 PE=1 SV=1	0	0.000267656	0	0	0	0	0	0	0	0	0	0	0.00014368	0.00026642	0.00021764	0.00027034	0.00022452	2	4	3	4	3.25
TSC1	Hamartin OS=Homo sapiens GN=TSC1 PE=1 SV=2	0	0.000267888	0	0	0	0	0	0	0	0	0	0	0.00010498	0.00019467	0.00014136	0.00013169	0.000143175	3	6	4	4	4.25
PPP1R10	Serine/threonine-protein phosphatase 1 regulatory subunit 10 OS=Homo sapiens GN=PPP1R10 PE=1 SV=1	0	0.000272385	0	0	0	0	0	0	0	0	0	0	0.00021666	0.00036158	0.0002188	0.0002446	0.00026041	5	9	5	6	6.25
CAST	Calpastatin OS=Homo sapiens GN=CAST PE=1 SV=4	0	0.000278029	0	0	0	0	0	0	0	0	0	0	0.00023012	0.00032005	0.0004067	0.000433	0.000347468	4	6	7	8	6.25
TTC26	Intraflagellar transport protein 56 OS=Homo sapiens GN=TTC26 PE=2 SV=1	0	0.000279654	0	0	0	0	0	0	0	0	0	0	0.00044114	0.00074985	0.0004455	0.00062254	0.000564757	6	11	6	9	8
GPKOW	G-patch domain and KOW motifs-containing protein OS=Homo sapiens GN=GPKOW PE=1 SV=2	0	0.000279828	0	0	0	0	0	0	0	0	0	0	0.00051343	0.0003967	0.00025925	0.00040253	0.000392978	6	5	3	5	4.75
RPS7	40S ribosomal protein S7 OS=Homo sapiens GN=RPS7 PE=1 SV=1	0	0.000283607	0	0	0	0	0	0	0	0	0	0	0.0010498	0.001168	0.0006361	0.00079012	0.000911005	5	6	3	4	4.5
NOP58	Nucleolar protein 58 OS=Homo sapiens GN=NOP58 PE=1 SV=1	0	0.000288292	0	0	0	0	0	0	0	0	0	0	0.00038499	0.0007139	0.00046655	0.00057952	0.00053624	5	10	6	8	7.25
CDC5L	Cell division cycle 5-like protein OS=Homo sapiens GN=CDC5L PE=1 SV=2	0	0.000289543	0	0	0	0	0	0	0	0	0	0	0.00020315	0.00023545	0.00035903	0.00033447	0.000283025	4	5	7	7	5.75
TNKS1BP1	182 kDa tankyrase-1-binding protein OS=Homo sapiens GN=TNKS1BP1 PE=1 SV=4	0	0.000293912	0	0	0	0	0	0	0	0	0	0	0.00021202	0.00019658	0.00021412	0.00011082	0.000183385	9	9	9	5	8
CEP192	Centrosomal protein of 192 kDa OS=Homo sapiens GN=CEP192 PE=1 SV=2	0	0.000297184	0	0	0	0	0	0	0	0	0	0	0.00029379	0.00027239	0.00019073	0.00037511	0.000283005	14	14	9	19	14
NAP1L1	Nucleosome assembly protein 1-like 1 OS=Homo sapiens GN=NAP1L1 PE=1 SV=1	0	0.000299121	0	0	0	0	0	0	0	0	0	0	0.0014584	0.00086928	0.00084163	0.0010781	0.00106185	14	9	8	11	10.5
HBS1L	HBS1-like protein OS=Homo sapiens GN=HBS1L PE=1 SV=1	0	0.000315858	0	0	0	0	0	0	0	0	0	0	0.00017865	0.00011043	0.00018041	0.0002241	0.000173398	3	2	3	4	3
NDC80	Kinetochore protein NDC80 homolog OS=Homo sapiens GN=NDC80 PE=1 SV=1	0	0.000317222	0	0	0	0	0	0	0	0	0	0	0.00025378	0.0002353	0.00019222	0.00035814	0.00025986	4	4	3	6	4.25
MSH6	DNA mismatch repair protein Msh6 OS=Homo sapiens GN=MSH6 PE=1 SV=2	0	0.000317227	0	0	0	0	0	0	0	0	0	0	0.0001198	0.00011107	9.0738e-05	0.00016906	0.000122667	4	4	3	6	4.25
PARD3	Partitioning defective 3 homolog OS=Homo sapiens GN=PARD3 PE=1 SV=2	0	0.000318155	0	0	0	0	0	0	0	0	0	0	0.00048061	0.00038991	0.00024268	0.00045216	0.00039134	16	14	8	16	13.5
ELP1	Elongator complex protein 1 OS=Homo sapiens GN=ELP1 PE=1 SV=3	0	0.000320784	0	0	0	0	0	0	0	0	0	0	0.00018348	0.00034023	0.00021617	0.00025892	0.0002497	6	12	7	9	8.5
ARCN1	Coatomer subunit delta OS=Homo sapiens GN=ARCN1 PE=1 SV=1	0	0.000323547	0	0	0	0	0	0	0	0	0	0	0.00047826	0.00044343	0.00024149	0.00037496	0.000384535	6	6	3	5	5
SF3A3	Splicing factor 3A subunit 3 OS=Homo sapiens GN=SF3A3 PE=1 SV=1	0	0.000325494	0	0	0	0	0	0	0	0	0	0	0.00048781	0.0003769	0.00057473	0.00030595	0.000436347	6	5	7	4	5.5
RPL24	60S ribosomal protein L24 OS=Homo sapiens GN=RPL24 PE=1 SV=1	0	0.000328396	0	0	0	0	0	0	0	0	0	0	0.0012972	0.00072163	0.00131	0.0014645	0.00119833	5	3	5	6	4.75
TRIM25	E3 ubiquitin/ISG15 ligase TRIM25 OS=Homo sapiens GN=TRIM25 PE=1 SV=2	0	0.000329995	0	0	0	0	0	0	0	0	0	0	0.00019396	0.00023978	0.00026117	0.00036496	0.000264968	3	4	4	6	4.25
NCAPD2	Condensin complex subunit 1 OS=Homo sapiens GN=NCAPD2 PE=1 SV=3	0	0.000339145	0	0	0	0	0	0	0	0	0	0	0.00014537	0.00016174	0.0001468	0.00024617	0.00017502	5	6	5	9	6.25
BRIX1	Ribosome biogenesis protein BRX1 homolog OS=Homo sapiens GN=BRIX1 PE=1 SV=2	0	0.000340736	0	0	0	0	0	0	0	0	0	0	0.0012693	0.00074889	0.0011653	0.0007599	0.000985847	11	7	10	7	8.75
ZNF638	Zinc finger protein 638 OS=Homo sapiens GN=ZNF638 PE=1 SV=2	0	0.000345963	0	0	0	0	0	0	0	0	0	0	4.1185e-05	7.6371e-05	8.3184e-05	7.7494e-05	6.95585e-05	2	4	4	4	3.5
MTA1	Metastasis-associated protein MTA1 OS=Homo sapiens GN=MTA1 PE=1 SV=2	0	0.000367428	0	0	0	0	0	0	0	0	0	0	0.00022787	0.00031691	0.00028765	0.00016079	0.000248305	4	8	6	4	5.5
NCAPG	Condensin complex subunit 3 OS=Homo sapiens GN=NCAPG PE=1 SV=1	0	0.000369214	0	0	0	0	0	0	0	0	0	0	0.00020065	0.00029766	0.00016211	0.00018877	0.000212297	5	8	4	5	5.5
STRIP1	Striatin-interacting protein 1 OS=Homo sapiens GN=STRIP1 PE=1 SV=1	0	0.000377952	0	0	0	0	0	0	0	0	0	0	0.00014599	0.00027072	0.00019658	0.0002747	0.000221998	3	6	4	6	4.75
CDK5RAP2	CDK5 regulatory subunit-associated protein 2 OS=Homo sapiens GN=CDK5RAP2 PE=1 SV=5	0	0.000386969	0	0	0	0	0	0	0	0	0	0	0.00017214	0.00033915	0.00028249	0.00034414	0.00028448	8	17	13	17	13.75
TAF9B	Transcription initiation factor TFIID subunit 9B OS=Homo sapiens GN=TAF9B PE=1 SV=1	0	0.000389257	0	0	0	0	0	0	0	0	0	0	0.00064912	0.00045138	0.00032776	0.00045802	0.00047157	4	3	2	3	3
EIF3F	Eukaryotic translation initiation factor 3 subunit F OS=Homo sapiens GN=EIF3F PE=1 SV=1	0	0.000392834	0	0	0	0	0	0	0	0	0	0	0.001255	0.0007405	0.00069134	0.00096607	0.000913227	11	7	6	9	8.25
SRRM2	Serine/arginine repetitive matrix protein 2 OS=Homo sapiens GN=SRRM2 PE=1 SV=2	0	0.000393221	0	0	0	0	0	0	0	0	0	0	0.00031082	0.00020584	0.00040357	0.00026457	0.0002962	21	15	27	19	20.5
VIRMA	Protein virilizer homolog OS=Homo sapiens GN=VIRMA PE=1 SV=2	0	0.000409582	0	0	0	0	0	0	0	0	0	0	0.00029223	0.00016673	0.00031782	0.00021148	0.000247065	13	8	14	10	11.25
SFPQ	Splicing factor, proline- and glutamine-rich OS=Homo sapiens GN=SFPQ PE=1 SV=2	0	0.000427225	0	0	0	0	0	0	0	0	0	0	0.00023045	0.00021367	0.00011636	0.00016261	0.000180773	5	4	3	3	3.75
MTA2	Metastasis-associated protein MTA2 OS=Homo sapiens GN=MTA2 PE=1 SV=1	0	0.00043392	0	0	0	0	0	0	0	0	0	0	0.00030488	0.00062189	0.00043105	0.00045893	0.000454188	5	11	7	8	7.75
IPO7	Importin-7 OS=Homo sapiens GN=IPO7 PE=1 SV=1	0	0.000442233	0	0	0	0	0	0	0	0	0	0	0.00031393	0.00018191	0.00019814	0.00018459	0.000219642	8	5	5	5	5.75
DST	Dystonin OS=Homo sapiens GN=DST PE=1 SV=4	0	0.000443628	0	0	0	0	0	0	0	0	0	0	7.533e-05	0.00012971	7.6074e-05	0.00012149	0.000100651	16	27	16	26	21.25
STRN4	Striatin-4 OS=Homo sapiens GN=STRN4 PE=1 SV=2	0	0.00045648	0	0	0	0	0	0	0	0	0	0	0.00064912	0.0012037	0.0012018	0.00081425	0.000967217	12	24	22	16	18.5
CTR9	RNA polymerase-associated protein CTR9 homolog OS=Homo sapiens GN=CTR9 PE=1 SV=1	0	0.000470901	0	0	0	0	0	0	0	0	0	0	0.00034725	0.00019317	0.00028054	0.00019601	0.000254243	10	6	8	6	7.5
EXOSC10	Exosome component 10 OS=Homo sapiens GN=EXOSC10 PE=1 SV=2	0	0.000479875	0	0	0	0	0	0	0	0	0	0	9.205e-05	0.00017069	0.00018592	0.0001299	0.00014464	2	4	4	3	3.25
UBAP2	Ubiquitin-associated protein 2 OS=Homo sapiens GN=UBAP2 PE=1 SV=1	0	0.000481892	0	0	0	0	0	0	0	0	0	0	0.0001456	0.00026999	0.0001838	0.00027396	0.000218337	4	8	5	8	6.25
ARFGAP1	ADP-ribosylation factor GTPase-activating protein 1 OS=Homo sapiens GN=ARFGAP1 PE=1 SV=2	0	0.000485124	0	0	0	0	0	0	0	0	0	0	0.0004013	0.00065113	0.0006079	0.00084947	0.00062745	4	7	6	9	6.5
ANAPC1	Anaphase-promoting complex subunit 1 OS=Homo sapiens GN=ANAPC1 PE=1 SV=1	0	0.000505788	0	0	0	0	0	0	0	0	0	0	0.00010476	0.00013599	6.3479e-05	9.8562e-05	0.000100698	5	7	3	5	5
KDM3B	Lysine-specific demethylase 3B OS=Homo sapiens GN=KDM3B PE=1 SV=2	0	0.0005235	0	0	0	0	0	0	0	0	0	0	0.00053199	0.0007077	0.00037374	0.00076163	0.000593765	23	33	16	35	26.75
PPM1G	Protein phosphatase 1G OS=Homo sapiens GN=PPM1G PE=1 SV=1	0	0.000529464	0	0	0	0	0	0	0	0	0	0	0.00082061	0.00062251	0.00037669	0.00070184	0.000630413	11	9	5	10	8.75
RPL8	60S ribosomal protein L8 OS=Homo sapiens GN=RPL8 PE=1 SV=2	0	0.000537775	0	0	0	0	0	0	0	0	0	0	0.00095094	0.0019103	0.0014405	0.0019384	0.00156003	6	13	9	13	10.25
MPP5	MAGUK p55 subfamily member 5 OS=Homo sapiens GN=MPP5 PE=1 SV=3	0	0.000581127	0	0	0	0	0	0	0	0	0	0	0.00018103	0.00016785	0.00024376	0.00011354	0.000176545	3	3	4	2	3
TAF6L	TAF6-like RNA polymerase II p300/CBP-associated factor-associated factor 65 kDa subunit 6L OS=Homo sapiens GN=TAF6L PE=1 SV=1	0	0.000583564	0	0	0	0	0	0	0	0	0	0	0.00032743	0.00030358	0.0001984	0.00043126	0.000315167	5	5	3	7	5
GEMIN4	Gem-associated protein 4 OS=Homo sapiens GN=GEMIN4 PE=1 SV=2	0	0.00059331	0	0	0	0	0	0	0	0	0	0	0.00034649	0.00042834	0.0001944	0.00039842	0.000341912	9	12	5	11	9.25
TAF4	Transcription initiation factor TFIID subunit 4 OS=Homo sapiens GN=TAF4 PE=1 SV=2	0	0.000600513	0	0	0	0	0	0	0	0	0	0	0.00033787	0.0005221	0.00026538	0.00049446	0.000404952	9	15	7	14	11.25
VAPA	Vesicle-associated membrane protein-associated protein A OS=Homo sapiens GN=VAPA PE=1 SV=3	0	0.000609083	0	0	0	0	0	0	0	0	0	0	0.00049075	0.00030334	0.00066079	0.0004617	0.000479145	3	2	4	3	3
RBM4	RNA-binding protein 4 OS=Homo sapiens GN=RBM4 PE=1 SV=1	0	0.000620234	0	0	0	0	0	0	0	0	0	0	0.0004476	0.0002075	0.00045203	0.00042111	0.00038206	4	2	4	4	3.5
RPLP2	60S acidic ribosomal protein P2 OS=Homo sapiens GN=RPLP2 PE=1 SV=1	0	0.000620717	0	0	0	0	0	0	0	0	0	0	0.0056671	0.0042691	0.0028615	0.0033322	0.00403247	16	13	8	10	11.75
PCNT	Pericentrin OS=Homo sapiens GN=PCNT PE=1 SV=4	0	0.000621093	0	0	0	0	0	0	0	0	0	0	0.00019536	0.00035094	0.00019729	0.00032164	0.000266307	16	31	16	28	22.75
TSNAX	Translin-associated protein X OS=Homo sapiens GN=TSNAX PE=1 SV=1	0	0.000625638	0	0	0	0	0	0	0	0	0	0	0.00028091	0.0005209	0.00028369	0.00039642	0.00037048	2	4	2	3	2.75
MAPKAP1	Target of rapamycin complex 2 subunit MAPKAP1 OS=Homo sapiens GN=MAPKAP1 PE=1 SV=2	0	0.000625777	0	0	0	0	0	0	0	0	0	0	0.00015606	0.00028939	0.0001576	0.00022023	0.00020582	2	4	2	3	2.75
RPL18A	60S ribosomal protein L18a OS=Homo sapiens GN=RPL18A PE=1 SV=2	0	0.00069606	0	0	0	0	0	0	0	0	0	0	0.0030086	0.001502	0.0023372	0.0017419	0.00214743	13	7	10	8	9.5
ZC3H18	Zinc finger CCCH domain-containing protein 18 OS=Homo sapiens GN=ZC3H18 PE=1 SV=2	0	0.000702601	0	0	0	0	0	0	0	0	0	0	8.5482e-05	0.00019814	0.00017265	0.00016084	0.000154278	2	5	4	4	3.75
UBA1	Ubiquitin-like modifier-activating enzyme 1 OS=Homo sapiens GN=UBA1 PE=1 SV=3	0	0.000720926	0	0	0	0	0	0	0	0	0	0	0.0001925	0.00024987	0.00011664	0.00025354	0.000203137	5	7	3	7	5.5
ERCC5	DNA repair protein complementing XP-G cells OS=Homo sapiens GN=ERCC5 PE=1 SV=3	0	0.000723207	0	0	0	0	0	0	0	0	0	0	0.00013738	0.00028658	0.00017342	0.00022618	0.00020589	4	9	5	7	6.25
EXOSC9	Exosome complex component RRP45 OS=Homo sapiens GN=EXOSC9 PE=1 SV=3	0	0.000745736	0	0	0	0	0	0	0	0	0	0	0.00027835	0.00043013	0.0002811	0.00052375	0.000378333	3	5	3	6	4.25
SUGP2	SURP and G-patch domain-containing protein 2 OS=Homo sapiens GN=SUGP2 PE=1 SV=2	0	0.000763241	0	0	0	0	0	0	0	0	0	0	0.00030116	0.00062826	0.00041819	0.00060208	0.000487423	8	18	11	17	13.5
CDC27	Cell division cycle protein 27 homolog OS=Homo sapiens GN=CDC27 PE=1 SV=2	0	0.000763903	0	0	0	0	0	0	0	0	0	0	9.8864e-05	0.00018333	0.00019968	0.00023253	0.000178601	2	4	4	5	3.75
SNRPB	Small nuclear ribonucleoprotein-associated proteins B and B' OS=Homo sapiens GN=SNRPB PE=1 SV=2	0	0.000782677	0	0	0	0	0	0	0	0	0	0	0.0010183	0.00062942	0.00085697	0.00047901	0.000745925	6	4	5	3	4.5
MDC1	Mediator of DNA damage checkpoint protein 1 OS=Homo sapiens GN=MDC1 PE=1 SV=3	0	0.000786997	0	0	0	0	0	0	0	0	0	0	0.00011699	7.2313e-05	0.00011815	0.0001651	0.000118138	6	4	6	9	6.25
EIF4A1	Eukaryotic initiation factor 4A-I OS=Homo sapiens GN=EIF4A1 PE=1 SV=1	0	0.000787435	0	0	0	0	0	0	0	0	0	0	0.00030098	0.00027905	0.00050658	0.00028316	0.000342442	3	3	5	3	3.5
SKA2	Spindle and kinetochore-associated protein 2 OS=Homo sapiens GN=SKA2 PE=1 SV=1	0	0.000825568	0	0	0	0	0	0	0	0	0	0	0.0020198	0.0012484	0.0013598	0.0009501	0.00139452	6	4	4	3	4.25
URB1	Nucleolar pre-ribosomal-associated protein 1 OS=Homo sapiens GN=URB1 PE=1 SV=4	0	0.000848015	0	0	0	0	0	0	0	0	0	0	0.00010761	4.9888e-05	7.2452e-05	6.7496e-05	7.43615e-05	6	3	4	4	4.25
RPS12	40S ribosomal protein S12 OS=Homo sapiens GN=RPS12 PE=1 SV=3	0	0.000857607	0	0	0	0	0	0	0	0	0	0	0.0018515	0.0011444	0.0021814	0.0011612	0.00158463	6	4	7	4	5.25
YBX1	Nuclease-sensitive element-binding protein 1 OS=Homo sapiens GN=YBX1 PE=1 SV=3	0	0.000888872	0	0	0	0	0	0	0	0	0	0	0.00025143	0.00046624	0.00038087	0.00023655	0.000333773	2	4	3	2	2.75
RPS4X	40S ribosomal protein S4, X isoform OS=Homo sapiens GN=RPS4X PE=1 SV=2	0	0.00089639	0	0	0	0	0	0	0	0	0	0	0.0020134	0.0017231	0.0031281	0.0016028	0.00211685	13	12	20	11	14
MIS12	Protein MIS12 homolog OS=Homo sapiens GN=MIS12 PE=1 SV=1	0	0.000902792	0	0	0	0	0	0	0	0	0	0	0.00039739	0.00092111	0.00080262	0.00093465	0.000763942	2	5	4	5	4
SETD2	Histone-lysine N-methyltransferase SETD2 OS=Homo sapiens GN=SETD2 PE=1 SV=3	0	0.000911028	0	0	0	0	0	0	0	0	0	0	6.3544e-05	2.9458e-05	6.4172e-05	4.4837e-05	5.05027e-05	4	2	4	3	3.25
SRSF3	Serine/arginine-rich splicing factor 3 OS=Homo sapiens GN=SRSF3 PE=1 SV=1	0	0.00091113	0	0	0	0	0	0	0	0	0	0	0.00099346	0.00046055	0.0010033	0.00070099	0.000789575	4	2	4	3	3.25
ACTR1A	Alpha-centractin OS=Homo sapiens GN=ACTR1A PE=1 SV=1	0	0.000912968	0	0	0	0	0	0	0	0	0	0	0.00054165	0.00030132	0.0006564	0.00071342	0.000553198	5	3	6	7	5.25
MEPCE	7SK snRNA methylphosphate capping enzyme OS=Homo sapiens GN=MEPCE PE=1 SV=1	0	0.000923305	0	0	0	0	0	0	0	0	0	0	0.00029559	0.00032887	0.00023881	0.00050056	0.000340957	5	6	4	9	6
SMC2	Structural maintenance of chromosomes protein 2 OS=Homo sapiens GN=SMC2 PE=1 SV=2	0	0.000926319	0	0	0	0	0	0	0	0	0	0	0.00013611	0.0001893	0.00010309	0.0002241	0.00016315	4	6	3	7	5
PRRC2B	Protein PRRC2B OS=Homo sapiens GN=PRRC2B PE=1 SV=2	0	0.00093486	0	0	0	0	0	0	0	0	0	0	0.00010964	0.00013554	5.5363e-05	0.00010315	0.000100923	7	9	4	7	6.75
WDR91	WD repeat-containing protein 91 OS=Homo sapiens GN=WDR91 PE=1 SV=2	0	0.000939067	0	0	0	0	0	0	0	0	0	0	0.00032716	0.00050556	0.00027533	0.00056429	0.000418085	6	10	5	11	8
WDR11	WD repeat-containing protein 11 OS=Homo sapiens GN=WDR11 PE=1 SV=1	0	0.000940906	0	0	0	0	0	0	0	0	0	0	9.9833e-05	0.00015427	6.7213e-05	0.00012523	0.000111636	3	5	2	4	3.5
XPO6	Exportin-6 OS=Homo sapiens GN=XPO6 PE=1 SV=1	0	0.000941006	0	0	0	0	0	0	0	0	0	0	0.00010862	0.00016785	7.3128e-05	0.00013625	0.000121462	3	5	2	4	3.5
EXOSC4	Exosome complex component RRP41 OS=Homo sapiens GN=EXOSC4 PE=1 SV=3	0	0.000959185	0	0	0	0	0	0	0	0	0	0	0.00033251	0.00077072	0.00050369	0.00062564	0.00055814	2	5	3	4	3.5
PIK3C3	Phosphatidylinositol 3-kinase catalytic subunit type 3 OS=Homo sapiens GN=PIK3C3 PE=1 SV=1	0	0.000959279	0	0	0	0	0	0	0	0	0	0	9.1842e-05	0.00021288	0.00013912	0.00017281	0.000154163	2	5	3	4	3.5
PSMC6	26S proteasome regulatory subunit 10B OS=Homo sapiens GN=PSMC6 PE=1 SV=1	0	0.000984053	0	0	0	0	0	0	0	0	0	0	0.00031413	0.00067958	0.00052872	0.00039404	0.000479117	3	7	5	4	4.75
DDX17	Probable ATP-dependent RNA helicase DDX17 OS=Homo sapiens GN=DDX17 PE=1 SV=2	0	0.000984345	0	0	0	0	0	0	0	0	0	0	0.00033524	0.00025902	0.00045141	0.00021026	0.000313983	8	6	9	6	7.25
DCTN2	Dynactin subunit 2 OS=Homo sapiens GN=DCTN2 PE=1 SV=4	0	0.00100166	0	0	0	0	0	0	0	0	0	0	0.00030473	0.00018836	0.00020516	0.00038225	0.000270125	3	2	2	4	2.75
SEC23B	Protein transport protein Sec23B OS=Homo sapiens GN=SEC23B PE=1 SV=2	0	0.0010019	0	0	0	0	0	0	0	0	0	0	0.00015932	9.8476e-05	0.00010726	0.00019985	0.000141227	3	2	2	4	2.75
CCDC8	Coiled-coil domain-containing protein 8 OS=Homo sapiens GN=CCDC8 PE=1 SV=2	0	0.00102942	0	0	0	0	0	0	0	0	0	0	0.00022713	0.00028078	0.00015292	0.00035614	0.000254242	3	4	2	5	3.5
TAB2	TGF-beta-activated kinase 1 and MAP3K7-binding protein 2 OS=Homo sapiens GN=TAB2 PE=1 SV=1	0	0.00104867	0	0	0	0	0	0	0	0	0	0	0.00011755	0.00021798	0.00017807	0.00027648	0.00019752	2	4	3	5	3.5
SRPK1	SRSF protein kinase 1 OS=Homo sapiens GN=SRPK1 PE=1 SV=2	0	0.00104867	0	0	0	0	0	0	0	0	0	0	0.00012437	0.00023063	0.0001884	0.00029252	0.00020898	2	4	3	5	3.5
KNTC1	Kinetochore-associated protein 1 OS=Homo sapiens GN=KNTC1 PE=1 SV=1	0	0.0010487	0	0	0	0	0	0	0	0	0	0	3.6878e-05	6.8385e-05	5.5864e-05	8.6738e-05	6.19662e-05	2	4	3	5	3.5
GOLGA2	Golgin subfamily A member 2 OS=Homo sapiens GN=GOLGA2 PE=1 SV=3	0	0.00104887	0	0	0	0	0	0	0	0	0	0	8.1301e-05	7.538e-05	0.00012316	0.00015298	0.000108205	2	2	3	4	2.75
PABPC4	Polyadenylate-binding protein 4 OS=Homo sapiens GN=PABPC4 PE=1 SV=1	0	0.00108498	0	0	0	0	0	0	0	0	0	0	0.00044274	0.00041049	0.00019162	0.00029752	0.000335592	14	13	9	11	11.75
STK4	Serine/threonine-protein kinase 4 OS=Homo sapiens GN=STK4 PE=1 SV=2	0	0.00111749	0	0	0	0	0	0	0	0	0	0	0.00058547	0.00062038	0.00025339	0.00047212	0.00048284	7	8	3	6	6
TAF1	Transcription initiation factor TFIID subunit 1 OS=Homo sapiens GN=TAF1 PE=1 SV=2	0	0.00112263	0	0	0	0	0	0	0	0	0	0	0.00015231	8.0695e-05	8.7894e-05	8.1882e-05	0.000100695	7	4	4	4	4.75
PPP2CA	Serine/threonine-protein phosphatase 2A catalytic subunit alpha isoform OS=Homo sapiens GN=PPP2CA PE=1 SV=1	0	0.00112915	0	0	0	0	0	0	0	0	0	0	0.00065909	0.00097775	0.00039936	0.00074409	0.000695073	5	8	3	6	5.5
GNPDA1	Glucosamine-6-phosphate isomerase 1 OS=Homo sapiens GN=GNPDA1 PE=1 SV=1	0	0.00114404	0	0	0	0	0	0	0	0	0	0	0.00070471	0.00065338	0.0011387	0.001326	0.000955697	5	5	8	10	7
XRCC4	DNA repair protein XRCC4 OS=Homo sapiens GN=XRCC4 PE=1 SV=2	0	0.0011892	0	0	0	0	0	0	0	0	0	0	0.0004849	0.00089918	0.0004897	0.0009124	0.000696545	4	8	4	8	6
PPP4C	Serine/threonine-protein phosphatase 4 catalytic subunit OS=Homo sapiens GN=PPP4C PE=1 SV=1	0	0.00120549	0	0	0	0	0	0	0	0	0	0	0.00053071	0.00061507	0.00026798	0.00037447	0.000447058	5	6	3	4	4.5
POLR3A	DNA-directed RNA polymerase III subunit RPC1 OS=Homo sapiens GN=POLR3A PE=1 SV=2	0	0.00120566	0	0	0	0	0	0	0	0	0	0	0.00011721	0.00013585	5.9186e-05	8.2707e-05	9.87382e-05	4	5	2	3	3.5
TRIR	Telomerase RNA component interacting RNase OS=Homo sapiens GN=TRIR PE=1 SV=1	0	0.00121559	0	0	0	0	0	0	0	0	0	0	0.0011572	0.0008583	0.00046744	0.0010887	0.00089291	5	4	2	5	4
PSMD1	26S proteasome non-ATPase regulatory subunit 1 OS=Homo sapiens GN=PSMD1 PE=1 SV=2	0	0.00122036	0	0	0	0	0	0	0	0	0	0	0.00025644	0.00023777	0.00047479	0.00044232	0.00035283	6	6	11	11	8.5
PSMD4	26S proteasome non-ATPase regulatory subunit 4 OS=Homo sapiens GN=PSMD4 PE=1 SV=1	0	0.00123075	0	0	0	0	0	0	0	0	0	0	0.00032413	0.00070121	0.00043644	0.00040659	0.000467093	3	7	4	4	4.5
WDR6	WD repeat-containing protein 6 OS=Homo sapiens GN=WDR6 PE=1 SV=1	0	0.00124627	0	0	0	0	0	0	0	0	0	0	7.2671e-05	0.00016845	0.00018347	0.00013674	0.000140333	2	5	5	4	4
DYNLL2	Dynein light chain 2, cytoplasmic OS=Homo sapiens GN=DYNLL2 PE=1 SV=1	0	0.00127599	0	0	0	0	0	0	0	0	0	0	0.001373	0.0021217	0.00092437	0.0012917	0.00142769	3	5	2	3	3.25
CSNK1E	Casein kinase I isoform epsilon OS=Homo sapiens GN=CSNK1E PE=1 SV=1	0	0.00127695	0	0	0	0	0	0	0	0	0	0	0.00019583	0.00045391	0.00039552	0.00027635	0.000330403	2	5	4	3	3.5
RPS19	40S ribosomal protein S19 OS=Homo sapiens GN=RPS19 PE=1 SV=2	0	0.00130022	0	0	0	0	0	0	0	0	0	0	0.0016855	0.00078135	0.0017021	0.0010571	0.00130651	6	3	6	4	4.75
MBD3	Methyl-CpG-binding domain protein 3 OS=Homo sapiens GN=MBD3 PE=1 SV=1	0	0.0013137	0	0	0	0	0	0	0	0	0	0	0.00097981	0.00051911	0.00098949	0.00052675	0.00075379	7	4	7	4	5.5
ANKRD52	Serine/threonine-protein phosphatase 6 regulatory ankyrin repeat subunit C OS=Homo sapiens GN=ANKRD52 PE=1 SV=3	0	0.0013202	0	0	0	0	0	0	0	0	0	0	0.00018927	0.00042118	0.00045875	0.0004986	0.00039195	5	12	12	14	10.75
HNRNPR	Heterogeneous nuclear ribonucleoprotein R OS=Homo sapiens GN=HNRNPR PE=1 SV=1	0	0.00136779	0	0	0	0	0	0	0	0	0	0	0.00045043	0.00017898	0.0003899	0.00030269	0.0003305	7	3	6	5	5.25
CLMN	Calmin OS=Homo sapiens GN=CLMN PE=1 SV=1	0	0.00148612	0	0	0	0	0	0	0	0	0	0	0.00012195	0.00011307	8.2105e-05	0.00019122	0.000127086	3	3	2	5	3.25
AFTPH	Aftiphilin OS=Homo sapiens GN=AFTPH PE=1 SV=2	0	0.00148763	0	0	0	0	0	0	0	0	0	0	0.00069553	0.00068518	0.0002634	0.00065436	0.000574617	16	17	6	16	13.75
CBX3	Chromobox protein homolog 3 OS=Homo sapiens GN=CBX3 PE=1 SV=4	0	0.00150823	0	0	0	0	0	0	0	0	0	0	0.00066774	0.0012382	0.00067434	0.00062821	0.000802123	3	6	3	3	3.75
RPP30	Ribonuclease P protein subunit p30 OS=Homo sapiens GN=RPP30 PE=1 SV=1	0	0.0015083	0	0	0	0	0	0	0	0	0	0	0.00030397	0.00056366	0.00030697	0.00028598	0.000365145	2	4	2	2	2.5
PPP1R2	Protein phosphatase inhibitor 2 OS=Homo sapiens GN=PPP1R2 PE=1 SV=2	0	0.00150868	0	0	0	0	0	0	0	0	0	0	0.00079477	0.0014738	0.00080262	0.00074772	0.000954728	4	8	4	4	5
BCAS2	Pre-mRNA-splicing factor SPF27 OS=Homo sapiens GN=BCAS2 PE=1 SV=1	0	0.00151742	0	0	0	0	0	0	0	0	0	0	0.00036206	0.00050354	0.00054846	0.00085157	0.000566407	2	3	3	5	3.25
PTPN13	Tyrosine-protein phosphatase non-receptor type 13 OS=Homo sapiens GN=PTPN13 PE=1 SV=2	0	0.00151748	0	0	0	0	0	0	0	0	0	0	3.2782e-05	4.5592e-05	4.9659e-05	7.7104e-05	5.12842e-05	2	3	3	5	3.25
PDAP1	28 kDa heat- and acid-stable phosphoprotein OS=Homo sapiens GN=PDAP1 PE=1 SV=1	0	0.00153439	0	0	0	0	0	0	0	0	0	0	0.0011252	0.0012519	0.00045452	0.0010586	0.000972555	5	6	2	5	4.5
KIF13A	Kinesin-like protein KIF13A OS=Homo sapiens GN=KIF13A PE=1 SV=2	0	0.00153449	0	0	0	0	0	0	0	0	0	0	0.00011283	0.00012554	4.5578e-05	0.00010615	9.75245e-05	5	6	2	5	4.5
AKAP13	A-kinase anchor protein 13 OS=Homo sapiens GN=AKAP13 PE=1 SV=2	0	0.00161177	0	0	0	0	0	0	0	0	0	0	0.00010136	0.00017453	7.3115e-05	0.00014985	0.000124714	7	13	5	11	9
SON	Protein SON OS=Homo sapiens GN=SON PE=1 SV=4	0	0.00164364	0	0	0	0	0	0	0	0	0	0	0.0001679	0.00010897	0.00025434	0.00014216	0.000168342	10	7	15	9	10.25
UPF1	Regulator of nonsense transcripts 1 OS=Homo sapiens GN=UPF1 PE=1 SV=2	0	0.00168177	0	0	0	0	0	0	0	0	0	0	7.2156e-05	0.00010035	0.00014574	6.7884e-05	9.65325e-05	2	3	4	2	2.75
USP16	Ubiquitin carboxyl-terminal hydrolase 16 OS=Homo sapiens GN=USP16 PE=1 SV=1	0	0.00176698	0	0	0	0	0	0	0	0	0	0	0.00024746	0.0003671	0.00014994	0.0003725	0.00028425	5	8	3	8	6
PRRC2A	Protein PRRC2A OS=Homo sapiens GN=PRRC2A PE=1 SV=3	0	0.00179399	0	0	0	0	0	0	0	0	0	0	7.5534e-05	7.0033e-05	7.6281e-05	0.00014213	9.09945e-05	5	5	5	9	6
DIS3L	DIS3-like exonuclease 1 OS=Homo sapiens GN=DIS3L PE=1 SV=2	0	0.0018066	0	0	0	0	0	0	0	0	0	0	0.00015458	0.00025081	0.00019513	0.00036357	0.000241023	4	7	5	10	6.5
CHD4	Chromodomain-helicase-DNA-binding protein 4 OS=Homo sapiens GN=CHD4 PE=1 SV=2	0	0.0018212	0	0	0	0	0	0	0	0	0	0	0.00010652	7.9007e-05	4.3028e-05	6.0127e-05	7.21705e-05	5	4	2	3	3.5
MTREX	Exosome RNA helicase MTR4 OS=Homo sapiens GN=MTREX PE=1 SV=3	0	0.00188114	0	0	0	0	0	0	0	0	0	0	0.00046908	0.00032619	0.00027634	0.00018388	0.000313872	12	9	7	5	8.25
BCLAF1	Bcl-2-associated transcription factor 1 OS=Homo sapiens GN=BCLAF1 PE=1 SV=2	0	0.00195198	0	0	0	0	0	0	0	0	0	0	0.0001771	0.00041049	0.00022356	0.00024992	0.000265268	4	10	5	6	6.25
WASHC2C	WASH complex subunit 2C OS=Homo sapiens GN=WASHC2C PE=1 SV=3	0	0.00200199	0	0	0	0	0	0	0	0	0	0	9.2713e-05	0.00022923	0.00012484	0.00017445	0.000155308	32	53	35	44	41
DDX6	Probable ATP-dependent RNA helicase DDX6 OS=Homo sapiens GN=DDX6 PE=1 SV=2	0	0.00202157	0	0	0	0	0	0	0	0	0	0	0.00084331	0.00054732	0.00034066	0.00047603	0.00055183	10	7	4	6	6.75
OSBPL3	Oxysterol-binding protein-related protein 3 OS=Homo sapiens GN=OSBPL3 PE=1 SV=1	0	0.0020923	0	0	0	0	0	0	0	0	0	0	0.00013776	8.5153e-05	0.0001855	8.6405e-05	0.000123705	3	2	4	2	2.75
SKA1	Spindle and kinetochore-associated protein 1 OS=Homo sapiens GN=SKA1 PE=1 SV=1	0	0.00210617	0	0	0	0	0	0	0	0	0	0	0.0009584	0.0004443	0.00048393	0.00090166	0.000697073	6	3	3	6	4.5
AP3B1	AP-3 complex subunit beta-1 OS=Homo sapiens GN=AP3B1 PE=1 SV=3	0	0.00221881	0	0	0	0	0	0	0	0	0	0	0.00018616	0.00010356	0.0002256	0.00010508	0.0001551	5	3	6	3	4.25
NUP54	Nucleoporin p54 OS=Homo sapiens GN=NUP54 PE=1 SV=2	0	0.00225082	0	0	0	0	0	0	0	0	0	0	0.00048204	0.00037244	0.00016227	0.0004535	0.000367562	6	5	2	6	4.75
MKL2	MKL/myocardin-like protein 2 OS=Homo sapiens GN=MKL2 PE=1 SV=3	0	0.00229638	0	0	0	0	0	0	0	0	0	0	0.00026206	0.00034711	0.00022684	0.00052832	0.000341082	7	10	6	15	9.5
HNRNPA1	Heterogeneous nuclear ribonucleoprotein A1 OS=Homo sapiens GN=HNRNPA1 PE=1 SV=5	0	0.00235685	0	0	0	0	0	0	0	0	0	0	0.0012044	0.00060912	0.0015481	0.0008241	0.00104643	11	6	14	8	9.75
ASCC3	Activating signal cointegrator 1 complex subunit 3 OS=Homo sapiens GN=ASCC3 PE=1 SV=3	0	0.00255526	0	0	0	0	0	0	0	0	0	0	7.3991e-05	8.5753e-05	5.6041e-05	0.00013922	8.87513e-05	4	5	3	8	5
RPLP1	60S acidic ribosomal protein P1 OS=Homo sapiens GN=RPLP1 PE=1 SV=1	0	0.00256743	0	0	0	0	0	0	0	0	0	0	0.0028584	0.0016564	0.0032475	0.0013446	0.00227672	8	5	9	4	6.5
BYSL	Bystin OS=Homo sapiens GN=BYSL PE=1 SV=3	0	0.0026968	0	0	0	0	0	0	0	0	0	0	0.00018642	0.00060494	0.00047065	0.00052614	0.000447038	2	7	5	6	5
POLD3	DNA polymerase delta subunit 3 OS=Homo sapiens GN=POLD3 PE=1 SV=2	0	0.00283594	0	0	0	0	0	0	0	0	0	0	0.00052445	0.00072937	0.00044136	0.0002467	0.00048547	6	9	5	3	5.75
CCDC43	Coiled-coil domain-containing protein 43 OS=Homo sapiens GN=CCDC43 PE=1 SV=2	0	0.00304209	0	0	0	0	0	0	0	0	0	0	0.00054552	0.0010116	0.00036727	0.0006843	0.000652172	3	6	2	4	3.75
WDHD1	WD repeat and HMG-box DNA-binding protein 1 OS=Homo sapiens GN=WDHD1 PE=1 SV=1	0	0.00306256	0	0	0	0	0	0	0	0	0	0	0.00014431	0.0004014	0.00021861	0.00027154	0.000258965	4	12	6	8	7.5
DENND4A	C-myc promoter-binding protein OS=Homo sapiens GN=DENND4A PE=1 SV=2	0	0.00312431	0	0	0	0	0	0	0	0	0	0	6.5591e-05	0.00012163	4.4159e-05	0.00010285	8.35575e-05	3	6	2	5	4
NAE1	NEDD8-activating enzyme E1 regulatory subunit OS=Homo sapiens GN=NAE1 PE=1 SV=1	0	0.00313781	0	0	0	0	0	0	0	0	0	0	0.00015255	0.00042433	0.00023109	0.00035881	0.000291695	2	6	3	5	4
RICTOR	Rapamycin-insensitive companion of mTOR OS=Homo sapiens GN=RICTOR PE=1 SV=1	0	0.00317216	0	0	0	0	0	0	0	0	0	0	0.00014309	0.00026533	0.00019267	0.00038141	0.000245625	6	12	8	17	10.75
WTAP	Pre-mRNA-splicing regulator WTAP OS=Homo sapiens GN=WTAP PE=1 SV=2	0	0.00319597	0	0	0	0	0	0	0	0	0	0	0.00041143	0.00019073	0.0004155	0.00019354	0.0003028	4	2	4	2	3
TMOD3	Tropomodulin-3 OS=Homo sapiens GN=TMOD3 PE=1 SV=1	0	0.0032327	0	0	0	0	0	0	0	0	0	0	0.00023143	0.00053644	0.00023372	0.00043546	0.000359263	2	5	2	4	3.25
RPN2	Dolichyl-diphosphooligosaccharide--protein glycosyltransferase subunit 2 OS=Homo sapiens GN=RPN2 PE=1 SV=3	0	0.00341146	0	0	0	0	0	0	0	0	0	0	0.00025821	0.0001197	0.00013038	0.00012146	0.000157437	4	2	2	2	2.5
RPL28	60S ribosomal protein L28 OS=Homo sapiens GN=RPL28 PE=1 SV=3	0	0.0034359	0	0	0	0	0	0	0	0	0	0	0.0020812	0.0011026	0.0021018	0.00083914	0.00153119	7	4	7	3	5.25
SMN1	Survival motor neuron protein OS=Homo sapiens GN=SMN1 PE=1 SV=1	0	0.00349605	0	0	0	0	0	0	0	0	0	0	0.00027709	0.00077072	0.00055965	0.00039103	0.000499623	2	6	4	3	3.75
STRAP	Serine-threonine kinase receptor-associated protein OS=Homo sapiens GN=STRAP PE=1 SV=1	0	0.00349657	0	0	0	0	0	0	0	0	0	0	0.00023275	0.00064741	0.00047011	0.00032846	0.000419683	2	6	4	3	3.75
ZCCHC8	Zinc finger CCHC domain-containing protein 8 OS=Homo sapiens GN=ZCCHC8 PE=1 SV=2	0	0.00368047	0	0	0	0	0	0	0	0	0	0	0.00023045	0.00037391	0.00011636	0.00032521	0.000261483	4	7	2	6	4.75
ANKS1A	Ankyrin repeat and SAM domain-containing protein 1A OS=Homo sapiens GN=ANKS1A PE=1 SV=4	0	0.00370568	0	0	0	0	0	0	0	0	0	0	7.1838e-05	0.00023312	0.0001451	0.00020276	0.000163204	2	7	4	6	4.75
ATF7IP	Activating transcription factor 7-interacting protein 1 OS=Homo sapiens GN=ATF7IP PE=1 SV=3	0	0.00379756	0	0	0	0	0	0	0	0	0	0	0.00012829	0.00011895	0.00019434	6.0348e-05	0.000125482	4	4	6	2	4
SIPA1L2	Signal-induced proliferation-associated 1-like protein 2 OS=Homo sapiens GN=SIPA1L2 PE=1 SV=2	0	0.00400162	0	0	0	0	0	0	0	0	0	0	4.7308e-05	6.5793e-05	4.7775e-05	0.00011127	6.80365e-05	2	3	2	5	3
MKI67	Proliferation marker protein Ki-67 OS=Homo sapiens GN=MKI67 PE=1 SV=2	0	0.00408717	0	0	0	0	0	0	0	0	0	0	0.00011259	9.279e-05	0.0001895	7.0616e-05	0.000116374	9	8	15	6	9.5
LRBA	Lipopolysaccharide-responsive and beige-like anchor protein OS=Homo sapiens GN=LRBA PE=1 SV=4	0	0.00409278	0	0	0	0	0	0	0	0	0	0	8.5362e-05	0.00019786	8.6206e-05	0.00018739	0.000139204	6	15	6	14	10.25
RPA1	Replication protein A 70 kDa DNA-binding subunit OS=Homo sapiens GN=RPA1 PE=1 SV=2	0	0.00410902	0	0	0	0	0	0	0	0	0	0	0.00039674	0.0010422	0.00046744	0.00080872	0.000678775	6	17	7	13	10.75
PPP6R2	Serine/threonine-protein phosphatase 6 regulatory subunit 2 OS=Homo sapiens GN=PPP6R2 PE=1 SV=2	0	0.00412592	0	0	0	0	0	0	0	0	0	0	0.00050599	0.00019547	0.00029808	0.00023802	0.00030939	12	5	7	6	7.5
RPS26	40S ribosomal protein S26 OS=Homo sapiens GN=RPS26 PE=1 SV=3	0	0.00425716	0	0	0	0	0	0	0	0	0	0	0.00070838	0.001642	0.0014308	0.00066645	0.00111191	2	5	4	2	3.25
MYBBP1A	Myb-binding protein 1A OS=Homo sapiens GN=MYBBP1A PE=1 SV=2	0	0.00439191	0	0	0	0	0	0	0	0	0	0	0.00067478	0.00034125	0.00068144	0.0002597	0.000489292	22	12	22	9	16.25
TAF10	Transcription initiation factor TFIID subunit 10 OS=Homo sapiens GN=TAF10 PE=1 SV=1	0	0.00444287	0	0	0	0	0	0	0	0	0	0	0.00056053	0.00034647	0.00037738	0.00087892	0.000540825	3	2	2	5	3
MPDZ	Multiple PDZ domain protein OS=Homo sapiens GN=MPDZ PE=1 SV=2	0	0.00446444	0	0	0	0	0	0	0	0	0	0	7.8709e-05	0.00012771	3.9743e-05	7.405e-05	8.0053e-05	4	7	2	4	4.25
CLSPN	Claspin OS=Homo sapiens GN=CLSPN PE=1 SV=3	0	0.00458961	0	0	0	0	0	0	0	0	0	0	9.1259e-05	0.00025384	0.00012288	0.00022895	0.000174232	3	9	4	8	6
BACH1	Transcription regulator protein BACH1 OS=Homo sapiens GN=BACH1 PE=1 SV=2	0	0.00465527	0	0	0	0	0	0	0	0	0	0	0.00033205	0.00035918	0.00022356	0.00010413	0.00025473	6	7	4	2	4.75
ABCF1	ATP-binding cassette sub-family F member 1 OS=Homo sapiens GN=ABCF1 PE=1 SV=2	0	0.00472947	0	0	0	0	0	0	0	0	0	0	0.00043383	0.00022346	0.00019472	0.0001814	0.000258353	9	5	4	4	5.5
HNRNPUL1	Heterogeneous nuclear ribonucleoprotein U-like protein 1 OS=Homo sapiens GN=HNRNPUL1 PE=1 SV=2	0	0.00490262	0	0	0	0	0	0	0	0	0	0	0.00047584	0.00017647	0.0005286	0.0002686	0.000362377	10	4	11	6	7.75
ILKAP	Integrin-linked kinase-associated serine/threonine phosphatase 2C OS=Homo sapiens GN=ILKAP PE=1 SV=1	0	0.00513588	0	0	0	0	0	0	0	0	0	0	0.00041563	0.0010597	0.00041974	0.00078206	0.000669282	4	11	4	8	6.75
OGT	UDP-N-acetylglucosamine--peptide N-acetylglucosaminyltransferase 110 kDa subunit OS=Homo sapiens GN=OGT PE=1 SV=3	0	0.00580023	0	0	0	0	0	0	0	0	0	0	7.7881e-05	0.00014442	0.00019663	7.3271e-05	0.00012305	2	4	5	2	3.25
CCDC97	Coiled-coil domain-containing protein 97 OS=Homo sapiens GN=CCDC97 PE=1 SV=1	0	0.00580043	0	0	0	0	0	0	0	0	0	0	0.0002375	0.00044041	0.00059963	0.00022344	0.000375245	2	4	5	2	3.25
UHRF1BP1L	UHRF1-binding protein 1-like OS=Homo sapiens GN=UHRF1BP1L PE=1 SV=2	0	0.00609091	0	0	0	0	0	0	0	0	0	0	8.3467e-05	0.00030955	0.00016858	0.00023558	0.000199294	3	12	6	9	7.5
ANKRD17	Ankyrin repeat domain-containing protein 17 OS=Homo sapiens GN=ANKRD17 PE=1 SV=3	0	0.00620548	0	0	0	0	0	0	0	0	0	0	4.6944e-05	0.00010156	3.1605e-05	7.3609e-05	6.34295e-05	13	17	9	16	13.75
COPS2	COP9 signalosome complex subunit 2 OS=Homo sapiens GN=COPS2 PE=1 SV=1	0	0.00640719	0	0	0	0	0	0	0	0	0	0	0.00055167	0.00025575	0.00046427	0.00017301	0.000361175	6	3	5	2	4
USP7	Ubiquitin carboxyl-terminal hydrolase 7 OS=Homo sapiens GN=USP7 PE=1 SV=2	0	0.00646226	0	0	0	0	0	0	0	0	0	0	0.00011089	0.00027416	0.00011198	0.0001391	0.000159032	3	8	3	4	4.5
CSNK2A2	Casein kinase II subunit alpha' OS=Homo sapiens GN=CSNK2A2 PE=1 SV=1	0	0.00665222	0	0	0	0	0	0	0	0	0	0	0.00023275	0.00086321	0.00047011	0.00054744	0.000528377	3	9	5	6	5.75
BRIP1	Fanconi anemia group J protein OS=Homo sapiens GN=BRIP1 PE=1 SV=1	0	0.00673143	0	0	0	0	0	0	0	0	0	0	9.7835e-05	0.00024189	0.00013174	9.2043e-05	0.000140877	3	8	4	3	4.5
TRIP12	E3 ubiquitin-protein ligase TRIP12 OS=Homo sapiens GN=TRIP12 PE=1 SV=1	0	0.00676975	0	0	0	0	0	0	0	0	0	0	6.1343e-05	0.00013271	4.13e-05	0.00011542	8.76932e-05	3	7	2	6	4.5
HECTD1	E3 ubiquitin-protein ligase HECTD1 OS=Homo sapiens GN=HECTD1 PE=1 SV=3	0	0.00695721	0	0	0	0	0	0	0	0	0	0	4.6818e-05	0.00010129	6.3041e-05	0.00014682	8.94922e-05	3	7	4	10	6
NSL1	Kinetochore-associated protein NSL1 homolog OS=Homo sapiens GN=NSL1 PE=1 SV=3	0	0.00699276	0	0	0	0	0	0	0	0	0	0	0.00043486	0.00080638	0.00029277	0.00095461	0.000622155	3	6	2	7	4.5
CFL1	Cofilin-1 OS=Homo sapiens GN=CFL1 PE=1 SV=3	0	0.0072171	0	0	0	0	0	0	0	0	0	0	0.0014722	0.002275	0.0004956	0.0016159	0.00146467	6	10	2	7	6.25
TSN	Translin OS=Homo sapiens GN=TSN PE=1 SV=1	0	0.007239	0	0	0	0	0	0	0	0	0	0	0.0003573	0.00049691	0.00090207	0.00033615	0.000523108	2	3	5	2	3
PMF1	Polyamine-modulated factor 1 OS=Homo sapiens GN=PMF1 PE=1 SV=2	0	0.00732228	0	0	0	0	0	0	0	0	0	0	0.00039739	0.00036844	0.0010033	0.00056079	0.00058248	2	2	5	3	3
RASAL2	Ras GTPase-activating protein nGAP OS=Homo sapiens GN=RASAL2 PE=1 SV=2	0	0.00766711	0	0	0	0	0	0	0	0	0	0	0.00032185	0.00089523	0.00039726	0.00094204	0.000639095	9	27	11	28	18.75
ARHGAP21	Rho GTPase-activating protein 21 OS=Homo sapiens GN=ARHGAP21 PE=1 SV=1	0	0.00768382	0	0	0	0	0	0	0	0	0	0	6.244e-05	0.00017368	8.4077e-05	0.00019581	0.000129002	3	9	4	10	6.5
SETDB1	Histone-lysine N-methyltransferase SETDB1 OS=Homo sapiens GN=SETDB1 PE=1 SV=1	0	0.00799928	0	0	0	0	0	0	0	0	0	0	9.4652e-05	0.00011701	6.3725e-05	0.00020778	0.000120792	3	4	2	7	4
RPL17	60S ribosomal protein L17 OS=Homo sapiens GN=RPL17 PE=1 SV=3	0	0.00864925	0	0	0	0	0	0	0	0	0	0	0.001771	0.00061574	0.0013413	0.00062479	0.00108821	8	3	6	3	5
POLA1	DNA polymerase alpha catalytic subunit OS=Homo sapiens GN=POLA1 PE=1 SV=2	0	0.00901482	0	0	0	0	0	0	0	0	0	0	0.00011144	0.00025831	8.4407e-05	0.00026211	0.000179067	4	10	3	10	6.75
TBC1D4	TBC1 domain family member 4 OS=Homo sapiens GN=TBC1D4 PE=1 SV=2	0	0.00980864	0	0	0	0	0	0	0	0	0	0	6.2761e-05	0.00020367	0.00015845	0.00029523	0.000180028	2	7	5	10	6
HNRNPA2B1	Heterogeneous nuclear ribonucleoproteins A2/B1 OS=Homo sapiens GN=HNRNPA2B1 PE=1 SV=2	0	0.0103247	0	0	0	0	0	0	0	0	0	0	0.00023078	0.00064191	0.00023306	0.00032567	0.000357855	4	6	4	3	4.25
EIF3H	Eukaryotic translation initiation factor 3 subunit H OS=Homo sapiens GN=EIF3H PE=1 SV=1	0	0.0104695	0	0	0	0	0	0	0	0	0	0	0.00023143	0.00064373	0.00023372	0.00065319	0.000440518	2	6	2	6	4
SBNO1	Protein strawberry notch homolog 1 OS=Homo sapiens GN=SBNO1 PE=1 SV=1	0	0.0106234	0	0	0	0	0	0	0	0	0	0	8.7721e-05	0.00013555	0.00023624	0.00033011	0.000197405	3	5	8	12	7
WDR81	WD repeat-containing protein 81 OS=Homo sapiens GN=WDR81 PE=1 SV=2	0	0.0109337	0	0	0	0	0	0	0	0	0	0	8.394e-05	0.00021402	6.3577e-05	0.00019743	0.000139742	4	11	3	10	7
UHRF1BP1	UHRF1-binding protein 1 OS=Homo sapiens GN=UHRF1BP1 PE=1 SV=1	0	0.011239	0	0	0	0	0	0	0	0	0	0	5.6572e-05	0.00018358	8.5697e-05	7.9835e-05	0.000101421	2	7	3	3	3.75
RBM14	RNA-binding protein 14 OS=Homo sapiens GN=RBM14 PE=1 SV=2	0	0.0116178	0	0	0	0	0	0	0	0	0	0	0.00048708	0.00016935	0.00024595	0.00017184	0.000268555	8	3	4	3	4.5
N4BP2	NEDD4-binding protein 2 OS=Homo sapiens GN=N4BP2 PE=1 SV=2	0	0.0117569	0	0	0	0	0	0	0	0	0	0	0.00011506	0.00032005	9.2959e-05	0.0002165	0.000186142	5	15	4	10	8.5
ELP3	Elongator complex protein 3 OS=Homo sapiens GN=ELP3 PE=1 SV=2	0	0.0183414	0	0	0	0	0	0	0	0	0	0	0.00037232	0.00075945	0.000376	0.00014011	0.00041197	5	11	5	2	5.75
PAF1	RNA polymerase II-associated factor 1 homolog OS=Homo sapiens GN=PAF1 PE=1 SV=2	0	0.0188236	0	0	0	0	0	0	0	0	0	0	0.00023012	0.00021336	0.00054226	0.00014433	0.000282518	3	3	7	2	3.75
PRCC	Proline-rich protein PRCC OS=Homo sapiens GN=PRCC PE=1 SV=1	0	0.0197387	0	0	0	0	0	0	0	0	0	0	0.00016591	0.00061532	0.00016755	0.00046828	0.000354265	2	8	2	6	4.5
DIP2B	Disco-interacting protein 2 homolog B OS=Homo sapiens GN=DIP2B PE=1 SV=3	0	0.0203395	0	0	0	0	0	0	0	0	0	0	7.7535e-05	0.0001917	7.8302e-05	4.863e-05	9.90418e-05	3	8	3	2	4
CTNNB1	Catenin beta-1 OS=Homo sapiens GN=CTNNB1 PE=1 SV=1	0	0.0203764	0	0	0	0	0	0	0	0	0	0	0.00015646	0.00038684	0.00010534	0.0001472	0.00019896	3	8	2	3	4
MIA3	Transport and Golgi organization protein 1 homolog OS=Homo sapiens GN=MIA3 PE=1 SV=1	0	0.0241871	0	0	0	0	0	0	0	0	0	0	4.2718e-05	0	4.314e-05	4.019e-05	3.1512e-05	2	0	2	2	1.5
G3BP2	Ras GTPase-activating protein-binding protein 2 OS=Homo sapiens GN=G3BP2 PE=1 SV=2	0	0.0241872	0	0	0	0	0	0	0	0	0	0	0.00025352	0	0.00025602	0.00023851	0.000187012	4	0	5	4	3.25
SNCA	Alpha-synuclein OS=Homo sapiens GN=SNCA PE=1 SV=1	0	0.0241872	0	0	0	0	0	0	0	0	0	0	0.00087283	0	0.00088145	0.00082116	0.00064386	3	0	3	3	2.25
PSMD12	26S proteasome non-ATPase regulatory subunit 12 OS=Homo sapiens GN=PSMD12 PE=1 SV=3	0	0.0241872	0	0	0	0	0	0	0	0	0	0	0.00017865	0	0.00018041	0.00016807	0.000131783	2	0	2	2	1.5
GOLGA4	Golgin subfamily A member 4 OS=Homo sapiens GN=GOLGA4 PE=1 SV=1	0	0.0241873	0	0	0	0	0	0	0	0	0	0	3.6531e-05	0	3.6892e-05	3.4368e-05	2.69478e-05	2	0	2	2	1.5
CDC16	Cell division cycle protein 16 homolog OS=Homo sapiens GN=CDC16 PE=1 SV=2	0	0.0242117	0	0	0	0	0	0	0	0	0	0	0.00019709	0.00018274	0	0.00018542	0.000141312	3	3	0	3	2.25
EEF1B2	Elongation factor 1-beta OS=Homo sapiens GN=EEF1B2 PE=1 SV=3	0	0.0242117	0	0	0	0	0	0	0	0	0	0	0.00036206	0.00033569	0	0.00034063	0.000259595	2	2	0	2	1.5
ACTL6A	Actin-like protein 6A OS=Homo sapiens GN=ACTL6A PE=1 SV=1	0	0.0242117	0	0	0	0	0	0	0	0	0	0	0.00018989	0.00017606	0	0.00017865	0.00013615	2	2	0	2	1.5
TAF12	Transcription initiation factor TFIID subunit 12 OS=Homo sapiens GN=TAF12 PE=1 SV=1	0	0.0242118	0	0	0	0	0	0	0	0	0	0	0.00050599	0.00046914	0	0.00047603	0.00036279	2	2	0	2	1.5
HNRNPC	Heterogeneous nuclear ribonucleoproteins C1/C2 OS=Homo sapiens GN=HNRNPC PE=1 SV=4	0	0.0242118	0	0	0	0	0	0	0	0	0	0	0.00026622	0.00024683	0	0.00025046	0.000190878	2	2	0	2	1.5
RPS17	40S ribosomal protein S17 OS=Homo sapiens GN=RPS17 PE=1 SV=2	0	0.0242119	0	0	0	0	0	0	0	0	0	0	0.0012069	0.001119	0	0.0011354	0.000865325	4	4	0	4	3
RBMX	RNA-binding motif protein, X chromosome OS=Homo sapiens GN=RBMX PE=1 SV=3	0	0.0242725	0	0	0	0	0	0	0	0	0	0	0.00031252	0.00028976	0.00031561	0	0.000229472	3	3	3	0	2.25
ASH2L	Set1/Ash2 histone methyltransferase complex subunit ASH2 OS=Homo sapiens GN=ASH2L PE=1 SV=1	0	0.0242734	0	0	0	0	0	0	0	0	0	0	0	0.00018041	0.0001965	0.00018306	0.000139993	0	3	3	3	2.25
CFAP20	Cilia- and flagella-associated protein 20 OS=Homo sapiens GN=CFAP20 PE=1 SV=1	0	0.0242735	0	0	0	0	0	0	0	0	0	0	0	0.00058703	0.0006394	0.00059566	0.000455523	0	3	3	3	2.25
SRP14	Signal recognition particle 14 kDa protein OS=Homo sapiens GN=SRP14 PE=1 SV=2	0	0.0248941	0	0	0	0	0	0	0	0	0	0	0.001198	0.0013884	0.0012098	0	0.00094905	4	5	4	0	3.25
EXOSC3	Exosome complex component RRP40 OS=Homo sapiens GN=EXOSC3 PE=1 SV=3	0	0.0254552	0	0	0	0	0	0	0	0	0	0	0	0.00068664	0.00059832	0.00055739	0.000460587	0	5	4	4	3.25
MNAT1	CDK-activating kinase assembly factor MAT1 OS=Homo sapiens GN=MNAT1 PE=1 SV=1	0	0.0258783	0	0	0	0	0	0	0	0	0	0	0	0.00048887	0.00053248	0.00062008	0.000410357	0	4	4	5	3.25
DDHD1	Phospholipase DDHD1 OS=Homo sapiens GN=DDHD1 PE=1 SV=2	0	0.0259933	0	0	0	0	0	0	0	0	0	0	0.0003168	0.00037765	0	0.00029805	0.000248125	7	9	0	7	5.75
CARD8	Caspase recruitment domain-containing protein 8 OS=Homo sapiens GN=CARD8 PE=1 SV=1	0	0.026567	0	0	0	0	0	0	0	0	0	0	0.00018901	0.0007886	0.00019088	0.00053347	0.00042549	2	9	2	6	4.75
RPAP2	Putative RNA polymerase II subunit B1 CTD phosphatase RPAP2 OS=Homo sapiens GN=RPAP2 PE=1 SV=1	0	0.0267527	0	0	0	0	0	0	0	0	0	0	0.00019967	0.00024683	0	0.00018785	0.000158587	3	4	0	3	2.5
WASHC3	WASH complex subunit 3 OS=Homo sapiens GN=WASHC3 PE=1 SV=1	0	0.0267533	0	0	0	0	0	0	0	0	0	0	0.00062988	0.00077867	0	0.00059259	0.000500285	3	4	0	3	2.5
BRCA2	Breast cancer type 2 susceptibility protein OS=Homo sapiens GN=BRCA2 PE=1 SV=3	0	0.0267777	0	0	0	0	0	0	0	0	0	0	3.5751e-05	4.4196e-05	4.8139e-05	0	3.20215e-05	3	4	4	0	2.75
EIF3K	Eukaryotic translation initiation factor 3 subunit K OS=Homo sapiens GN=EIF3K PE=1 SV=1	0	0.0268585	0	0	0	0	0	0	0	0	0	0	0.0011211	0.00086618	0	0.00087892	0.00071655	6	5	0	5	4
SSX2IP	Afadin- and alpha-actinin-binding protein OS=Homo sapiens GN=SSX2IP PE=1 SV=3	0	0.0269266	0	0	0	0	0	0	0	0	0	0	0.00033169	0	0.00026798	0.00024965	0.00021233	5	0	4	4	3.25
RBM28	RNA-binding protein 28 OS=Homo sapiens GN=RBM28 PE=1 SV=3	0	0.0270974	0	0	0	0	0	0	0	0	0	0	0	0.00024878	0.00032517	0.00025244	0.000206597	0	5	6	5	4
EXOSC7	Exosome complex component RRP42 OS=Homo sapiens GN=EXOSC7 PE=1 SV=3	0	0.0271553	0	0	0	0	0	0	0	0	0	0	0.00069986	0.00051911	0.00056542	0	0.000446097	5	4	4	0	3.25
MTUS1	Microtubule-associated tumor suppressor 1 OS=Homo sapiens GN=MTUS1 PE=1 SV=2	0	0.0272499	0	0	0	0	0	0	0	0	0	0	0	0.00017842	0.00012956	0.00015087	0.000114713	0	6	4	5	3.75
HNRNPD	Heterogeneous nuclear ribonucleoprotein D0 OS=Homo sapiens GN=HNRNPD PE=1 SV=1	0	0.0272552	0	0	0	0	0	0	0	0	0	0	0.00045895	0	0.00057936	0.00043178	0.000367522	4	0	5	4	3.25
SUMO1	Small ubiquitin-related modifier 1 OS=Homo sapiens GN=SUMO1 PE=1 SV=1	0	0.0272553	0	0	0	0	0	0	0	0	0	0	0.0016131	0	0.0020364	0.0015177	0.0012918	4	0	5	4	3.25
RAI14	Ankycorbin OS=Homo sapiens GN=RAI14 PE=1 SV=2	0	0.0273259	0	0	0	0	0	0	0	0	0	0	0.00012469	0.00011561	0	0.00015641	9.91775e-05	3	3	0	4	2.5
MPRIP	Myosin phosphatase Rho-interacting protein OS=Homo sapiens GN=MPRIP PE=1 SV=3	0	0.0274366	0	0	0	0	0	0	0	0	0	0	0.00015895	0.00022107	0	0.00018693	0.000141737	4	6	0	5	3.75
NT5DC2	5'-nucleotidase domain-containing protein 2 OS=Homo sapiens GN=NT5DC2 PE=1 SV=1	0	0.0280245	0	0	0	0	0	0	0	0	0	0	0	0.00021788	0.00015821	0.00022108	0.000149292	0	3	2	3	2
PSMD14	26S proteasome non-ATPase regulatory subunit 14 OS=Homo sapiens GN=PSMD14 PE=1 SV=1	0	0.028025	0	0	0	0	0	0	0	0	0	0	0	0.00036547	0.00026538	0.00037085	0.000250425	0	3	2	3	2
AP2M1	AP-2 complex subunit mu OS=Homo sapiens GN=AP2M1 PE=1 SV=2	0	0.0284762	0	0	0	0	0	0	0	0	0	0	0	0.00026045	0.00037825	0.00035237	0.000247768	0	3	4	4	2.75
PSMD13	26S proteasome non-ATPase regulatory subunit 13 OS=Homo sapiens GN=PSMD13 PE=1 SV=2	0	0.0289354	0	0	0	0	0	0	0	0	0	0	0.00021666	0.00030132	0.0002188	0	0.000184195	2	3	2	0	1.75
ANAPC7	Anaphase-promoting complex subunit 7 OS=Homo sapiens GN=ANAPC7 PE=1 SV=4	0	0.0289354	0	0	0	0	0	0	0	0	0	0	0.000136	0.00018914	0.00013734	0	0.00011562	2	3	2	0	1.75
ALYREF	THO complex subunit 4 OS=Homo sapiens GN=ALYREF PE=1 SV=3	0	0.0289354	0	0	0	0	0	0	0	0	0	0	0.00031698	0.00044084	0.00032011	0	0.000269482	2	3	2	0	1.75
USP54	Inactive ubiquitin carboxyl-terminal hydrolase 54 OS=Homo sapiens GN=USP54 PE=1 SV=4	0	0.0289355	0	0	0	0	0	0	0	0	0	0	4.8375e-05	6.7278e-05	4.8853e-05	0	4.11265e-05	2	3	2	0	1.75
SF3B4	Splicing factor 3B subunit 4 OS=Homo sapiens GN=SF3B4 PE=1 SV=1	0	0.0289358	0	0	0	0	0	0	0	0	0	0	0.00019213	0.00026721	0.00019403	0	0.000163343	2	3	2	0	1.75
ELAC2	Zinc phosphodiesterase ELAC protein 2 OS=Homo sapiens GN=ELAC2 PE=1 SV=2	0	0.0290047	0	0	0	0	0	0	0	0	0	0	0.00014794	0.00013716	9.9599e-05	0	9.61748e-05	3	3	2	0	2
ZNF250	Zinc finger protein 250 OS=Homo sapiens GN=ZNF250 PE=1 SV=3	0	0.029025	0	0	0	0	0	0	0	0	0	0	0.00029094	0.00020231	0.00029382	0	0.000196767	4	3	4	0	2.75
PARP1	Poly [ADP-ribose] polymerase 1 OS=Homo sapiens GN=PARP1 PE=1 SV=4	0	0.0291036	0	0	0	0	0	0	0	0	0	0	0.00012051	0	8.1133e-05	0.00011337	7.87533e-05	3	0	2	3	2
PRPF3	U4/U6 small nuclear ribonucleoprotein Prp3 OS=Homo sapiens GN=PRPF3 PE=1 SV=2	0	0.0291041	0	0	0	0	0	0	0	0	0	0	0.00017891	0	0.00012045	0.00016832	0.00011692	3	0	2	3	2
PDZD8	PDZ domain-containing protein 8 OS=Homo sapiens GN=PDZD8 PE=1 SV=1	0	0.0291141	0	0	0	0	0	0	0	0	0	0	0.00010589	0	0.00014258	9.9621e-05	8.70227e-05	3	0	4	3	2.5
NAP1L4	Nucleosome assembly protein 1-like 4 OS=Homo sapiens GN=NAP1L4 PE=1 SV=1	0	0.0293983	0	0	0	0	0	0	0	0	0	0	0.00032586	0.00030212	0.00043877	0	0.000266687	3	5	5	0	3.25
SMARCD2	SWI/SNF-related matrix-associated actin-dependent regulator of chromatin subfamily D member 2 OS=Homo sapiens GN=SMARCD2 PE=1 SV=3	0	0.0294193	0	0	0	0	0	0	0	0	0	0	0.00015342	0	0.00015493	0.0002165	0.000131212	2	0	2	3	1.75
SNRPD1	Small nuclear ribonucleoprotein Sm D1 OS=Homo sapiens GN=SNRPD1 PE=1 SV=1	0	0.0294197	0	0	0	0	0	0	0	0	0	0	0.00068457	0	0.00069134	0.00096607	0.000585495	2	0	2	3	1.75
ARHGEF10	Rho guanine nucleotide exchange factor 10 OS=Homo sapiens GN=ARHGEF10 PE=1 SV=4	0	0.0294197	0	0	0	0	0	0	0	0	0	0	5.9506e-05	0	6.0094e-05	8.3975e-05	5.08938e-05	2	0	2	3	1.75
CDK12	Cyclin-dependent kinase 12 OS=Homo sapiens GN=CDK12 PE=1 SV=2	0	0.0294198	0	0	0	0	0	0	0	0	0	0	5.4674e-05	0	5.5214e-05	7.7156e-05	4.6761e-05	3	0	3	5	2.75
ZBTB21	Zinc finger and BTB domain-containing protein 21 OS=Homo sapiens GN=ZBTB21 PE=1 SV=2	0	0.0297145	0	0	0	0	0	0	0	0	0	0	0	0.00017714	0.00011576	0.00014379	0.000109172	0	5	3	4	3
LPP	Lipoma-preferred partner OS=Homo sapiens GN=LPP PE=1 SV=1	0	0.0299573	0	0	0	0	0	0	0	0	0	0	0.00019967	0.00030854	0	0.00025046	0.000189668	3	5	0	4	3
SERBP1	Plasminogen activator inhibitor 1 RNA-binding protein OS=Homo sapiens GN=SERBP1 PE=1 SV=2	0	0.0299577	0	0	0	0	0	0	0	0	0	0	0.0002995	0.00046281	0	0.00037569	0.0002845	3	5	0	4	3
PAIP1	Polyadenylate-binding protein-interacting protein 1 OS=Homo sapiens GN=PAIP1 PE=1 SV=1	0	0.0299998	0	0	0	0	0	0	0	0	0	0	0.00034014	0.00023653	0	0.00024	0.000204168	4	3	0	3	2.5
PHAX	Phosphorylated adapter RNA export protein OS=Homo sapiens GN=PHAX PE=1 SV=1	0	0.0300798	0	0	0	0	0	0	0	0	0	0	0	0.00028755	0.0002088	0.00019452	0.000172718	0	3	2	2	1.75
EFL1	Elongation factor-like GTPase 1 OS=Homo sapiens GN=EFL1 PE=1 SV=2	0	0.0300808	0	0	0	0	0	0	0	0	0	0	0	0.00010116	7.3454e-05	6.843e-05	6.0761e-05	0	3	2	2	1.75
DDX19B	ATP-dependent RNA helicase DDX19B OS=Homo sapiens GN=DDX19B PE=1 SV=1	0	0.0300808	0	0	0	0	0	0	0	0	0	0	0	0.00023653	0.00017175	0.00016	0.00014207	0	3	2	2	1.75
PDCL3	Phosducin-like protein 3 OS=Homo sapiens GN=PDCL3 PE=1 SV=1	0	0.0302304	0	0	0	0	0	0	0	0	0	0	0.00034085	0.00047404	0	0.00032068	0.000283893	2	3	0	2	1.75
PASK	PAS domain-containing serine/threonine-protein kinase OS=Homo sapiens GN=PASK PE=1 SV=3	0	0.0302309	0	0	0	0	0	0	0	0	0	0	6.1575e-05	8.5636e-05	0	5.793e-05	5.12853e-05	2	3	0	2	1.75
SAP18	Histone deacetylase complex subunit SAP18 OS=Homo sapiens GN=SAP18 PE=1 SV=1	0	0.0302311	0	0	0	0	0	0	0	0	0	0	0.00053244	0.0007405	0	0.00050092	0.000443465	2	3	0	2	1.75
DDB1	DNA damage-binding protein 1 OS=Homo sapiens GN=DDB1 PE=1 SV=1	0	0.0302672	0	0	0	0	0	0	0	0	0	0	0	0.00013251	0.00010825	0.00016807	0.000102208	0	4	3	5	3
ATP6V1B2	V-type proton ATPase subunit B, brain isoform OS=Homo sapiens GN=ATP6V1B2 PE=1 SV=3	0	0.0309396	0	0	0	0	0	0	0	0	0	0	0	0.00014781	0.000161	0.00022497	0.000133445	0	2	2	3	1.75
CDCA2	Cell division cycle-associated protein 2 OS=Homo sapiens GN=CDCA2 PE=1 SV=2	0	0.0309417	0	0	0	0	0	0	0	0	0	0	0	7.3833e-05	8.0419e-05	0.00011238	6.6658e-05	0	2	2	3	1.75
NBN	Nibrin OS=Homo sapiens GN=NBN PE=1 SV=1	0	0.030945	0	0	0	0	0	0	0	0	0	0	0.00016206	0.00015026	0	0.00010165	0.000103492	3	3	0	2	2
RNF10	RING finger protein 10 OS=Homo sapiens GN=RNF10 PE=1 SV=2	0	0.0310988	0	0	0	0	0	0	0	0	0	0	0.00010045	9.3133e-05	0	0.00014175	8.38332e-05	2	2	0	3	1.75
LAS1L	Ribosomal biogenesis protein LAS1L OS=Homo sapiens GN=LAS1L PE=1 SV=2	0	0.031099	0	0	0	0	0	0	0	0	0	0	0.00011099	0.0001029	0	0.00015662	9.26275e-05	2	2	0	3	1.75
SNW1	SNW domain-containing protein 1 OS=Homo sapiens GN=SNW1 PE=1 SV=1	0	0.0310995	0	0	0	0	0	0	0	0	0	0	0.00015198	0.00014092	0	0.00021448	0.000126845	2	2	0	3	1.75
SMARCA4	Transcription activator BRG1 OS=Homo sapiens GN=SMARCA4 PE=1 SV=2	0	0.0310998	0	0	0	0	0	0	0	0	0	0	4.9462e-05	4.586e-05	0	6.9801e-05	4.12808e-05	2	2	0	3	1.75
CPSF7	Cleavage and polyadenylation specificity factor subunit 7 OS=Homo sapiens GN=CPSF7 PE=1 SV=1	0	0.031165	0	0	0	0	0	0	0	0	0	0	0	0.00024054	0.000262	0.00016272	0.000166315	0	3	3	2	2
PKN2	Serine/threonine-protein kinase N2 OS=Homo sapiens GN=PKN2 PE=1 SV=1	0	0.0315083	0	0	0	0	0	0	0	0	0	0	0.00012418	7.6759e-05	0	0.00011683	7.94422e-05	3	2	0	3	2
TAF8	Transcription initiation factor TFIID subunit 8 OS=Homo sapiens GN=TAF8 PE=1 SV=1	0	0.0315087	0	0	0	0	0	0	0	0	0	0	0.00039418	0.00024365	0	0.00037085	0.00025217	3	2	0	3	2
ZFR	Zinc finger RNA-binding protein OS=Homo sapiens GN=ZFR PE=1 SV=2	0	0.0324458	0	0	0	0	0	0	0	0	0	0	0.00011378	7.0327e-05	0.0001149	0	7.47518e-05	3	2	3	0	2
CEP131	Centrosomal protein of 131 kDa OS=Homo sapiens GN=CEP131 PE=1 SV=3	0	0.0324462	0	0	0	0	0	0	0	0	0	0	0.00011283	6.9742e-05	0.00011395	0	7.41305e-05	3	2	3	0	2
SRSF6	Serine/arginine-rich splicing factor 6 OS=Homo sapiens GN=SRSF6 PE=1 SV=2	0	0.0334058	0	0	0	0	0	0	0	0	0	0	0.00059203	0.00076848	0	0.00044559	0.000451525	5	7	0	4	4
ZW10	Centromere/kinetochore protein zw10 homolog OS=Homo sapiens GN=ZW10 PE=1 SV=3	0	0.0335291	0	0	0	0	0	0	0	0	0	0	0.00015686	9.6959e-05	0.00010561	0	8.98573e-05	3	2	2	0	1.75
KNOP1	Lysine-rich nucleolar protein 1 OS=Homo sapiens GN=KNOP1 PE=1 SV=1	0	0.03353	0	0	0	0	0	0	0	0	0	0	0.0002668	0.00016491	0.00017963	0	0.000152835	3	2	2	0	1.75
IFT27	Intraflagellar transport protein 27 homolog OS=Homo sapiens GN=IFT27 PE=1 SV=1	0	0.0338146	0	0	0	0	0	0	0	0	0	0	0.00043798	0	0.00066346	0.00041205	0.000378372	2	0	3	2	1.75
ECHDC1	Ethylmalonyl-CoA decarboxylase OS=Homo sapiens GN=ECHDC1 PE=1 SV=2	0	0.0342016	0	0	0	0	0	0	0	0	0	0	0.00026535	0.00024603	0.00040197	0	0.000228338	2	2	3	0	1.75
POLR2E	DNA-directed RNA polymerases I, II, and III subunit RPABC1 OS=Homo sapiens GN=POLR2E PE=1 SV=4	0	0.034565	0	0	0	0	0	0	0	0	0	0	0	0.00089918	0.00058764	0.00054744	0.000508565	0	5	3	3	2.75
ARHGEF16	Rho guanine nucleotide exchange factor 16 OS=Homo sapiens GN=ARHGEF16 PE=1 SV=1	0	0.0345651	0	0	0	0	0	0	0	0	0	0	0	0.00026633	0.00017405	0.00016215	0.000150632	0	5	3	3	2.75
YTHDF2	YTH domain-containing family protein 2 OS=Homo sapiens GN=YTHDF2 PE=1 SV=2	0	0.0347878	0	0	0	0	0	0	0	0	0	0	0.00021105	0.00032613	0	0.00019855	0.000183932	3	5	0	3	2.75
TAB3	TGF-beta-activated kinase 1 and MAP3K7-binding protein 3 OS=Homo sapiens GN=TAB3 PE=1 SV=2	0	0.0349556	0	0	0	0	0	0	0	0	0	0	0.00028604	0.00015912	0	0.00021529	0.000165113	5	3	0	4	3
GPATCH1	G patch domain-containing protein 1 OS=Homo sapiens GN=GPATCH1 PE=1 SV=1	0	0.0351345	0	0	0	0	0	0	0	0	0	0	0.00013125	8.1129e-05	0	8.2322e-05	7.36753e-05	3	2	0	2	1.75
KMT2A	Histone-lysine N-methyltransferase 2A OS=Homo sapiens GN=KMT2A PE=1 SV=5	0	0.0351366	0	0	0	0	0	0	0	0	0	0	3.0788e-05	1.903e-05	0	1.931e-05	1.7282e-05	3	2	0	2	1.75
RBBP6	E3 ubiquitin-protein ligase RBBP6 OS=Homo sapiens GN=RBBP6 PE=1 SV=1	0	0.0354757	0	0	0	0	0	0	0	0	0	0	4.546e-05	8.4298e-05	6.8863e-05	0	4.96553e-05	2	4	3	0	2.25
USP11	Ubiquitin carboxyl-terminal hydrolase 11 OS=Homo sapiens GN=USP11 PE=1 SV=3	0	0.0354769	0	0	0	0	0	0	0	0	0	0	8.4594e-05	0.00015687	0.00012814	0	9.2401e-05	2	4	3	0	2.25
RPS15	40S ribosomal protein S15 OS=Homo sapiens GN=RPS15 PE=1 SV=2	0	0.0356479	0	0	0	0	0	0	0	0	0	0	0	0.0010418	0.0017021	0.0010571	0.00095025	0	4	6	4	3.5
NCOA2	Nuclear receptor coactivator 2 OS=Homo sapiens GN=NCOA2 PE=1 SV=2	0	0.0357218	0	0	0	0	0	0	0	0	0	0	0	7.7388e-05	8.4292e-05	0.00013088	7.314e-05	0	3	3	5	2.75
COPB2	Coatomer subunit beta' OS=Homo sapiens GN=COPB2 PE=1 SV=2	0	0.0358979	0	0	0	0	0	0	0	0	0	0	8.9916e-05	0.00016673	0	0.00012689	9.5884e-05	2	4	0	3	2.25
YEATS2	YEATS domain-containing protein 2 OS=Homo sapiens GN=YEATS2 PE=1 SV=2	0	0.0358986	0	0	0	0	0	0	0	0	0	0	5.7288e-05	0.00010623	0	8.0845e-05	6.10907e-05	2	4	0	3	2.25
GIT2	ARF GTPase-activating protein GIT2 OS=Homo sapiens GN=GIT2 PE=1 SV=2	0	0.0358996	0	0	0	0	0	0	0	0	0	0	0.00010733	0.00019903	0	0.00015147	0.000114457	2	5	0	6	3.25
PIAS2	E3 SUMO-protein ligase PIAS2 OS=Homo sapiens GN=PIAS2 PE=1 SV=3	0	0.0363736	0	0	0	0	0	0	0	0	0	0	0	0.00036488	0.00026496	0.00049366	0.000280875	0	6	4	8	4.5
CENPJ	Centromere protein J OS=Homo sapiens GN=CENPJ PE=1 SV=2	0	0.0363742	0	0	0	0	0	0	0	0	0	0	0	8.4676e-05	6.1486e-05	0.00011456	6.51805e-05	0	3	2	4	2.25
DSN1	Kinetochore-associated protein DSN1 homolog OS=Homo sapiens GN=DSN1 PE=1 SV=2	0	0.0369885	0	0	0	0	0	0	0	0	0	0	0	0.0006365	0.00034664	0.00064586	0.00040725	0	6	3	6	3.75
WNK3	Serine/threonine-protein kinase WNK3 OS=Homo sapiens GN=WNK3 PE=1 SV=3	0	0.0369886	0	0	0	0	0	0	0	0	0	0	0	0.00012588	6.8557e-05	0.00012774	8.05442e-05	0	7	9	10	6.5
USP9X	Probable ubiquitin carboxyl-terminal hydrolase FAF-X OS=Homo sapiens GN=USP9X PE=1 SV=3	0	0.0373635	0	0	0	0	0	0	0	0	0	0	3.1698e-05	5.8779e-05	0	5.9643e-05	3.753e-05	2	4	0	4	2.5
MAPRE1	Microtubule-associated protein RP/EB family member 1 OS=Homo sapiens GN=MAPRE1 PE=1 SV=3	0	0.0377069	0	0	0	0	0	0	0	0	0	0	0	0.00056366	0.00046046	0.00028598	0.000327525	0	4	3	2	2.25
ELOB	Elongin-B OS=Homo sapiens GN=ELOB PE=1 SV=1	0	0.0377084	0	0	0	0	0	0	0	0	0	0	0	0.0012802	0.0010458	0.0006495	0.000743875	0	4	3	2	2.25
GTF2F1	General transcription factor IIF subunit 1 OS=Homo sapiens GN=GTF2F1 PE=1 SV=2	0	0.0389123	0	0	0	0	0	0	0	0	0	0	0.00023636	0.00014609	0	0.00029649	0.000169735	3	2	0	4	2.25
RPS10	40S ribosomal protein S10 OS=Homo sapiens GN=RPS10 PE=1 SV=1	0	0.0411161	0	0	0	0	0	0	0	0	0	0	0.00098744	0	0.0007479	0.00046449	0.000549958	4	0	3	2	2.25
SDCCAG3	Serologically defined colon cancer antigen 3 OS=Homo sapiens GN=SDCCAG3 PE=1 SV=3	0	0.0413275	0	0	0	0	0	0	0	0	0	0	0.00046818	0.00026045	0	0.00026428	0.000248228	5	3	0	3	2.75
RTF1	RNA polymerase-associated protein RTF1 homolog OS=Homo sapiens GN=RTF1 PE=1 SV=4	0	0.043202	0	0	0	0	0	0	0	0	0	0	0	0.00010638	0.00023174	0.00016192	0.00012501	0	2	4	3	2.25
XRN1	5'-3' exoribonuclease 1 OS=Homo sapiens GN=XRN1 PE=1 SV=1	0	0.0432369	0	0	0	0	0	0	0	0	0	0	9.5503e-05	0.00013282	0	0.00020216	0.000107621	4	6	0	9	4.75
NELFA	Negative elongation factor A OS=Homo sapiens GN=NELFA PE=1 SV=3	0	0.0436247	0	0	0	0	0	0	0	0	0	0	0.00015429	0.0002861	0.00015581	0	0.00014905	2	4	2	0	2
SET	Protein SET OS=Homo sapiens GN=SET PE=1 SV=3	0	0.0459217	0	0	0	0	0	0	0	0	0	0	0	0.0005209	0.00028369	0.00026428	0.000267217	0	4	2	2	2
KRT18	Keratin, type I cytoskeletal 18 OS=Homo sapiens GN=KRT18 PE=1 SV=2	0	0.0459237	0	0	0	0	0	0	0	0	0	0	0	0.00052696	0.00028698	0.00026735	0.000270322	0	7	4	4	3.75
ARHGAP35	Rho GTPase-activating protein 35 OS=Homo sapiens GN=ARHGAP35 PE=1 SV=3	0	0.0467299	0	0	0	0	0	0	0	0	0	0	5.4346e-05	0.00012597	0	0.00012782	7.7034e-05	2	5	0	5	3
ANAPC4	Anaphase-promoting complex subunit 4 OS=Homo sapiens GN=ANAPC4 PE=1 SV=2	0	0.047635	0	0	0	0	0	0	0	0	0	0	0	9.3479e-05	0.00010182	0.00018971	9.62523e-05	0	2	2	4	2
SLX4	Structure-specific endonuclease subunit SLX4 OS=Homo sapiens GN=SLX4 PE=1 SV=3	0	0.0480036	0	0	0	0	0	0	0	0	0	0	4.4419e-05	4.1184e-05	0	8.3578e-05	4.22953e-05	2	2	0	4	2
FLII	Protein flightless-1 homolog OS=Homo sapiens GN=FLII PE=1 SV=2	0	0.0492859	0	0	0	0	0	0	0	0	0	0	0.00012839	0.00032736	0	0.00030198	0.000189432	4	11	0	10	6.25
TAF2	Transcription initiation factor TFIID subunit 2 OS=Homo sapiens GN=TAF2 PE=1 SV=3	0	0.0511009	0	0	0	0	0	0	0	0	0	0	0.00013589	0	0.00017154	6.3921e-05	9.28378e-05	4	0	5	2	2.75
CPSF1	Cleavage and polyadenylation specificity factor subunit 1 OS=Homo sapiens GN=CPSF1 PE=1 SV=2	0	0.0520418	0	0	0	0	0	0	0	0	0	0	0.00011291	0	5.7012e-05	5.3113e-05	5.57588e-05	4	0	2	2	2
PKP2	Plakophilin-2 OS=Homo sapiens GN=PKP2 PE=1 SV=2	0	0.0528915	0	0	0	0	0	0	0	0	0	0	0	0.00021433	9.3381e-05	0.00026098	0.000142173	0	5	2	6	3.25
AP3M1	AP-3 complex subunit mu-1 OS=Homo sapiens GN=AP3M1 PE=1 SV=1	0	0.0533197	0	0	0	0	0	0	0	0	0	0	0.00019489	0	0.00039363	0.00018335	0.000192968	2	0	4	2	2
PPP4R2	Serine/threonine-protein phosphatase 4 regulatory subunit 2 OS=Homo sapiens GN=PPP4R2 PE=1 SV=3	0	0.0533823	0	0	0	0	0	0	0	0	0	0	0.00039071	0.00054339	0.00019729	0	0.000282847	4	6	2	0	3
TBPL1	TATA box-binding protein-like protein 1 OS=Homo sapiens GN=TBPL1 PE=1 SV=1	0	0.0539865	0	0	0	0	0	0	0	0	0	0	0.00043798	0.00040608	0.00088461	0	0.000432167	2	2	4	0	2
CC2D1A	Coiled-coil and C2 domain-containing protein 1A OS=Homo sapiens GN=CC2D1A PE=1 SV=1	0	0.0551597	0	0	0	0	0	0	0	0	0	0	8.5661e-05	0.00023827	0	0.00024177	0.000141425	2	6	0	6	3.5
LRRC59	Leucine-rich repeat-containing protein 59 OS=Homo sapiens GN=LRRC59 PE=1 SV=1	0	0.0595015	0	0	0	0	0	0	0	0	0	0	0.0011941	0	0.0010719	0.00037447	0.000660117	9	0	8	3	5
MAP1S	Microtubule-associated protein 1S OS=Homo sapiens GN=MAP1S PE=1 SV=2	0	0.0601156	0	0	0	0	0	0	0	0	0	0	7.6925e-05	0.00024963	0	0.00021711	0.000135916	2	7	0	6	3.75
PRR14L	Protein PRR14L OS=Homo sapiens GN=PRR14L PE=1 SV=1	0	0.0625644	0	0	0	0	0	0	0	0	0	0	3.7873e-05	8.7786e-05	0	0.00012471	6.25922e-05	2	5	0	7	3.5
NT5C2	Cytosolic purine 5'-nucleotidase OS=Homo sapiens GN=NT5C2 PE=1 SV=1	0	0.0647218	0	0	0	0	0	0	0	0	0	0	0	0.00040391	0.00014665	0.00020492	0.00018887	0	6	2	3	2.75
TACC1	Transforming acidic coiled-coil-containing protein 1 OS=Homo sapiens GN=TACC1 PE=1 SV=2	0	0.0703639	0	0	0	0	0	0	0	0	0	0	0	9.3827e-05	0.00020439	0.00033322	0.000157859	0	2	4	7	3.25
DHX30	Putative ATP-dependent RNA helicase DHX30 OS=Homo sapiens GN=DHX30 PE=1 SV=1	0	0.074721	0	0	0	0	0	0	0	0	0	0	0.00017057	0	6.8902e-05	6.4189e-05	7.59152e-05	5	0	2	2	2.25
CCNT1	Cyclin-T1 OS=Homo sapiens GN=CCNT1 PE=1 SV=1	0	0.0817217	0	0	0	0	0	0	0	0	0	0	0	0.00036413	0.00016998	0.00010557	0.00015992	0	7	3	2	3
NOL9	Polynucleotide 5'-hydroxyl-kinase NOL9 OS=Homo sapiens GN=NOL9 PE=1 SV=1	0	0.105955	0	0	0	0	0	0	0	0	0	0	0.00011605	0	0.00011719	0.00038212	0.00015384	2	0	2	7	2.75
DKC1	H/ACA ribonucleoprotein complex subunit 4 OS=Homo sapiens GN=DKC1 PE=1 SV=3	0	0.133982	0	0	0	0	0	0	0	0	0	0	0.00023774	0	0.00024008	0	0.000119455	3	0	3	0	1.5
ARL2	ADP-ribosylation factor-like protein 2 OS=Homo sapiens GN=ARL2 PE=1 SV=4	0	0.133982	0	0	0	0	0	0	0	0	0	0	0.00044274	0	0.00044711	0	0.000222462	2	0	2	0	1
LIMA1	LIM domain and actin-binding protein 1 OS=Homo sapiens GN=LIMA1 PE=1 SV=1	0	0.133982	0	0	0	0	0	0	0	0	0	0	0.000161	0	0.00016259	0	8.08975e-05	3	0	3	0	1.5
RPL36A	60S ribosomal protein L36a OS=Homo sapiens GN=RPL36A PE=1 SV=2	0	0.133982	0	0	0	0	0	0	0	0	0	0	0.00076853	0	0.00077612	0	0.000386163	2	0	2	0	1
C8orf33	UPF0488 protein C8orf33 OS=Homo sapiens GN=C8orf33 PE=1 SV=1	0	0.133982	0	0	0	0	0	0	0	0	0	0	0.00053361	0	0.00053888	0	0.000268123	3	0	3	0	1.5
COPS8	COP9 signalosome complex subunit 8 OS=Homo sapiens GN=COPS8 PE=1 SV=1	0	0.133982	0	0	0	0	0	0	0	0	0	0	0.00038978	0	0.00039363	0	0.000195853	2	0	2	0	1
THOC6	THO complex subunit 6 homolog OS=Homo sapiens GN=THOC6 PE=1 SV=1	0	0.133982	0	0	0	0	0	0	0	0	0	0	0.0002389	0	0.00024126	0	0.00012004	2	0	2	0	1
SNRPD2	Small nuclear ribonucleoprotein Sm D2 OS=Homo sapiens GN=SNRPD2 PE=1 SV=1	0	0.133982	0	0	0	0	0	0	0	0	0	0	0.00069037	0	0.00069719	0	0.00034689	2	0	2	0	1
IGF2BP3	Insulin-like growth factor 2 mRNA-binding protein 3 OS=Homo sapiens GN=IGF2BP3 PE=1 SV=2	0	0.133982	0	0	0	0	0	0	0	0	0	0	0.0001407	0	0.00014209	0	7.06975e-05	3	0	2	0	1.25
PHB	Prohibitin OS=Homo sapiens GN=PHB PE=1 SV=1	0	0.133982	0	0	0	0	0	0	0	0	0	0	0.00074875	0	0.00075615	0	0.000376225	5	0	5	0	2.5
RPAP1	RNA polymerase II-associated protein 1 OS=Homo sapiens GN=RPAP1 PE=1 SV=3	0	0.133982	0	0	0	0	0	0	0	0	0	0	8.7721e-05	0	8.8588e-05	0	4.40772e-05	3	0	3	0	1.5
KIF20B	Kinesin-like protein KIF20B OS=Homo sapiens GN=KIF20B PE=1 SV=3	0	0.133982	0	0	0	0	0	0	0	0	0	0	4.476e-05	0	4.5203e-05	0	2.24908e-05	2	0	2	0	1
VAPB	Vesicle-associated membrane protein-associated protein B/C OS=Homo sapiens GN=VAPB PE=1 SV=3	0	0.133982	0	0	0	0	0	0	0	0	0	0	0.00033524	0	0.00033856	0	0.00016845	3	0	4	0	1.75
IMPDH2	Inosine-5'-monophosphate dehydrogenase 2 OS=Homo sapiens GN=IMPDH2 PE=1 SV=2	0	0.133982	0	0	0	0	0	0	0	0	0	0	0.00015849	0	0.00016006	0	7.96375e-05	2	0	2	0	1
NXF1	Nuclear RNA export factor 1 OS=Homo sapiens GN=NXF1 PE=1 SV=1	0	0.133982	0	0	0	0	0	0	0	0	0	0	0.00032901	0	0.00033227	0	0.00016532	5	0	5	0	2.5
LTV1	Protein LTV1 homolog OS=Homo sapiens GN=LTV1 PE=1 SV=1	0	0.133982	0	0	0	0	0	0	0	0	0	0	0.00025725	0	0.0002598	0	0.000129263	3	0	3	0	1.5
MARK3	MAP/microtubule affinity-regulating kinase 3 OS=Homo sapiens GN=MARK3 PE=1 SV=4	0	0.133992	0	0	0	0	0	0	0	0	0	0	0	0.00010031	0	0.00010178	5.05225e-05	0	2	0	2	1
AURKB	Aurora kinase B OS=Homo sapiens GN=AURKB PE=1 SV=3	0	0.133992	0	0	0	0	0	0	0	0	0	0	0	0.00021957	0	0.00022279	0.00011059	0	2	0	2	1
CNN2	Calponin-2 OS=Homo sapiens GN=CNN2 PE=1 SV=4	0	0.133992	0	0	0	0	0	0	0	0	0	0	0	0.00024444	0	0.00024803	0.000123118	0	3	0	3	1.5
RANBP1	Ran-specific GTPase-activating protein OS=Homo sapiens GN=RANBP1 PE=1 SV=1	0	0.133992	0	0	0	0	0	0	0	0	0	0	0	0.00037578	0	0.0003813	0.00018927	0	2	0	2	1
FIGNL1	Fidgetin-like protein 1 OS=Homo sapiens GN=FIGNL1 PE=1 SV=2	0	0.133992	0	0	0	0	0	0	0	0	0	0	0	0.0001681	0	0.00017057	8.46675e-05	0	3	0	3	1.5
ANAPC5	Anaphase-promoting complex subunit 5 OS=Homo sapiens GN=ANAPC5 PE=1 SV=2	0	0.133992	0	0	0	0	0	0	0	0	0	0	0	0.00010004	0	0.00010151	5.03875e-05	0	2	0	2	1
FAM192A	Protein FAM192A OS=Homo sapiens GN=FAM192A PE=1 SV=1	0	0.133992	0	0	0	0	0	0	0	0	0	0	0	0.00029737	0	0.00030174	0.000149777	0	2	0	2	1
BACH2	Transcription regulator protein BACH2 OS=Homo sapiens GN=BACH2 PE=1 SV=1	0	0.133992	0	0	0	0	0	0	0	0	0	0	0	0.00017962	0	0.00018226	9.047e-05	0	4	0	4	2
TIMELESS	Protein timeless homolog OS=Homo sapiens GN=TIMELESS PE=1 SV=2	0	0.133992	0	0	0	0	0	0	0	0	0	0	0	6.2526e-05	0	6.3445e-05	3.14928e-05	0	2	0	2	1
NT5DC1	5'-nucleotidase domain-containing protein 1 OS=Homo sapiens GN=NT5DC1 PE=1 SV=1	0	0.133992	0	0	0	0	0	0	0	0	0	0	0	0.000166	0	0.00016844	8.361e-05	0	2	0	2	1
CAMSAP2	Calmodulin-regulated spectrin-associated protein 2 OS=Homo sapiens GN=CAMSAP2 PE=1 SV=3	0	0.133992	0	0	0	0	0	0	0	0	0	0	0	7.6089e-05	0	7.7208e-05	3.83242e-05	0	3	0	3	1.5
AGO2	Protein argonaute-2 OS=Homo sapiens GN=AGO2 PE=1 SV=3	0	0.133992	0	0	0	0	0	0	0	0	0	0	0	0.00013189	0	0.00013383	6.643e-05	0	3	0	3	1.5
TANC1	Protein TANC1 OS=Homo sapiens GN=TANC1 PE=1 SV=3	0	0.133992	0	0	0	0	0	0	0	0	0	0	0	4.0586e-05	0	4.1183e-05	2.04423e-05	0	2	0	2	1
COBLL1	Cordon-bleu protein-like 1 OS=Homo sapiens GN=COBLL1 PE=1 SV=2	0	0.133992	0	0	0	0	0	0	0	0	0	0	0	6.2733e-05	0	6.3656e-05	3.15972e-05	0	2	0	2	1
SMAP1	Stromal membrane-associated protein 1 OS=Homo sapiens GN=SMAP1 PE=1 SV=2	0	0.133992	0	0	0	0	0	0	0	0	0	0	0	0.00040434	0	0.00041029	0.000203657	0	5	0	5	2.5
MAML1	Mastermind-like protein 1 OS=Homo sapiens GN=MAML1 PE=1 SV=3	0	0.133992	0	0	0	0	0	0	0	0	0	0	0	7.4341e-05	0	7.5435e-05	3.7444e-05	0	2	0	2	1
CDKAL1	Threonylcarbamoyladenosine tRNA methylthiotransferase OS=Homo sapiens GN=CDKAL1 PE=1 SV=1	0	0.133992	0	0	0	0	0	0	0	0	0	0	0	0.00013045	0	0.00013237	6.5705e-05	0	2	0	2	1
HTT	Huntingtin OS=Homo sapiens GN=HTT PE=1 SV=2	0	0.133992	0	0	0	0	0	0	0	0	0	0	0	2.4039e-05	0	2.4393e-05	1.2108e-05	0	2	0	2	1
NUF2	Kinetochore protein Nuf2 OS=Homo sapiens GN=NUF2 PE=1 SV=2	0	0.133992	0	0	0	0	0	0	0	0	0	0	0	0.00016278	0	0.00016518	8.199e-05	0	2	0	2	1
TRMT1L	TRMT1-like protein OS=Homo sapiens GN=TRMT1L PE=1 SV=2	0	0.133992	0	0	0	0	0	0	0	0	0	0	0	0.00010304	0	0.00010456	5.19e-05	0	2	0	2	1
PICALM	Phosphatidylinositol-binding clathrin assembly protein OS=Homo sapiens GN=PICALM PE=1 SV=2	0	0.133992	0	0	0	0	0	0	0	0	0	0	0	0.00011584	0	0.00011755	5.83475e-05	0	2	0	2	1
DCP1B	mRNA-decapping enzyme 1B OS=Homo sapiens GN=DCP1B PE=1 SV=2	0	0.134272	0	0	0	0	0	0	0	0	0	0	0.00013203	0	0	0.00012422	6.40625e-05	2	0	0	2	1
PSMD3	26S proteasome non-ATPase regulatory subunit 3 OS=Homo sapiens GN=PSMD3 PE=1 SV=2	0	0.134273	0	0	0	0	0	0	0	0	0	0	0.00022883	0	0	0.00021529	0.00011103	3	0	0	3	1.5
SRGAP2	SLIT-ROBO Rho GTPase-activating protein 2 OS=Homo sapiens GN=SRGAP2 PE=1 SV=3	0	0.134273	0	0	0	0	0	0	0	0	0	0	7.6063e-05	0	0	7.1561e-05	3.6906e-05	2	0	0	2	1
INF2	Inverted formin-2 OS=Homo sapiens GN=INF2 PE=1 SV=2	0	0.134273	0	0	0	0	0	0	0	0	0	0	9.7835e-05	0	0	9.2043e-05	4.74695e-05	3	0	0	3	1.5
DPCD	Protein DPCD OS=Homo sapiens GN=DPCD PE=1 SV=2	0	0.134273	0	0	0	0	0	0	0	0	0	0	0.0004013	0	0	0.00037754	0.00019471	2	0	0	2	1
RBM34	RNA-binding protein 34 OS=Homo sapiens GN=RBM34 PE=1 SV=2	0	0.134273	0	0	0	0	0	0	0	0	0	0	0.00028418	0	0	0.00026735	0.000137882	3	0	0	3	1.5
RPL22	60S ribosomal protein L22 OS=Homo sapiens GN=RPL22 PE=1 SV=2	0	0.134273	0	0	0	0	0	0	0	0	0	0	0.0012729	0	0	0.0011975	0.0006176	4	0	0	4	2
SNRPGP15	Putative small nuclear ribonucleoprotein G-like protein 15 OS=Homo sapiens GN=SNRPGP15 PE=5 SV=2	0	0.134273	0	0	0	0	0	0	0	0	0	0	0.0010719	0	0	0.0010084	0.000520075	2	0	0	2	1
CHUK	Inhibitor of nuclear factor kappa-B kinase subunit alpha OS=Homo sapiens GN=CHUK PE=1 SV=2	0	0.134274	0	0	0	0	0	0	0	0	0	0	0.00010935	0	0	0.00010287	5.3055e-05	2	0	0	2	1
KMT2D	Histone-lysine N-methyltransferase 2D OS=Homo sapiens GN=KMT2D PE=1 SV=2	0	0.134376	0	0	0	0	0	0	0	0	0	0	0	0	1.4858e-05	1.3842e-05	7.175e-06	0	0	2	2	1
SAFB	Scaffold attachment factor B1 OS=Homo sapiens GN=SAFB PE=1 SV=4	0	0.134377	0	0	0	0	0	0	0	0	0	0	0	0	8.9911e-05	8.3761e-05	4.3418e-05	0	0	2	2	1
RBM12	RNA-binding protein 12 OS=Homo sapiens GN=RBM12 PE=1 SV=1	0	0.134377	0	0	0	0	0	0	0	0	0	0	0	0	8.8271e-05	8.2233e-05	4.2626e-05	0	0	2	2	1
MAP7D3	MAP7 domain-containing protein 3 OS=Homo sapiens GN=MAP7D3 PE=1 SV=2	0	0.134377	0	0	0	0	0	0	0	0	0	0	0	0	9.3914e-05	8.749e-05	4.5351e-05	0	0	2	2	1
CYFIP2	Cytoplasmic FMR1-interacting protein 2 OS=Homo sapiens GN=CYFIP2 PE=1 SV=2	0	0.134377	0	0	0	0	0	0	0	0	0	0	0	0	9.656e-05	8.9955e-05	4.66287e-05	0	0	9	10	4.75
COPB1	Coatomer subunit beta OS=Homo sapiens GN=COPB1 PE=1 SV=3	0	0.134377	0	0	0	0	0	0	0	0	0	0	0	0	0.00017265	0.00016084	8.33725e-05	0	0	4	4	2
PRKAA1	5'-AMP-activated protein kinase catalytic subunit alpha-1 OS=Homo sapiens GN=PRKAA1 PE=1 SV=4	0	0.134377	0	0	0	0	0	0	0	0	0	0	0	0	0.00014717	0.0001371	7.10675e-05	0	0	2	2	1
ZNF460	Zinc finger protein 460 OS=Homo sapiens GN=ZNF460 PE=1 SV=2	0	0.134377	0	0	0	0	0	0	0	0	0	0	0	0	0.00014639	0.00013637	7.069e-05	0	0	2	2	1
HGS	Hepatocyte growth factor-regulated tyrosine kinase substrate OS=Homo sapiens GN=HGS PE=1 SV=1	0	0.134432	0	0	0	0	0	0	0	0	0	0	0.00010484	9.7208e-05	0	0	5.0512e-05	2	2	0	0	1
RFLNB	Refilin-B OS=Homo sapiens GN=RFLNB PE=1 SV=1	0	0.134432	0	0	0	0	0	0	0	0	0	0	0.00038067	0.00035295	0	0	0.000183405	2	2	0	0	1
ERCC1	DNA excision repair protein ERCC-1 OS=Homo sapiens GN=ERCC1 PE=1 SV=1	0	0.134432	0	0	0	0	0	0	0	0	0	0	0.00041143	0.00038147	0	0	0.000198225	3	3	0	0	1.5
POLR1C	DNA-directed RNA polymerases I and III subunit RPAC1 OS=Homo sapiens GN=POLR1C PE=1 SV=1	0	0.134432	0	0	0	0	0	0	0	0	0	0	0.00035317	0.00032745	0	0	0.000170155	3	3	0	0	1.5
RIMKLA	N-acetylaspartylglutamate synthase A OS=Homo sapiens GN=RIMKLA PE=2 SV=2	0	0.134432	0	0	0	0	0	0	0	0	0	0	0.00031252	0.00028976	0	0	0.00015057	3	3	0	0	1.5
IQGAP1	Ras GTPase-activating-like protein IQGAP1 OS=Homo sapiens GN=IQGAP1 PE=1 SV=1	0	0.134432	0	0	0	0	0	0	0	0	0	0	7.3745e-05	6.8374e-05	0	0	3.55298e-05	3	3	0	0	1.5
WDR61	WD repeat-containing protein 61 OS=Homo sapiens GN=WDR61 PE=1 SV=1	0	0.134433	0	0	0	0	0	0	0	0	0	0	0.00040064	0.00037146	0	0	0.000193025	3	3	0	0	1.5
ZRANB2	Zinc finger Ran-binding domain-containing protein 2 OS=Homo sapiens GN=ZRANB2 PE=1 SV=2	0	0.134433	0	0	0	0	0	0	0	0	0	0	0.00024686	0.00022888	0	0	0.000118935	2	2	0	0	1
UBXN4	UBX domain-containing protein 4 OS=Homo sapiens GN=UBXN4 PE=1 SV=2	0	0.134433	0	0	0	0	0	0	0	0	0	0	0.00016036	0.00014868	0	0	7.726e-05	2	2	0	0	1
EXOSC8	Exosome complex component RRP43 OS=Homo sapiens GN=EXOSC8 PE=1 SV=1	0	0.134433	0	0	0	0	0	0	0	0	0	0	0.00044274	0.00041049	0	0	0.000213307	3	3	0	0	1.5
CHAMP1	Chromosome alignment-maintaining phosphoprotein 1 OS=Homo sapiens GN=CHAMP1 PE=1 SV=2	0	0.134433	0	0	0	0	0	0	0	0	0	0	0.00010033	9.3018e-05	0	0	4.8337e-05	2	2	0	0	1
DDX55	ATP-dependent RNA helicase DDX55 OS=Homo sapiens GN=DDX55 PE=1 SV=3	0	0.134559	0	0	0	0	0	0	0	0	0	0	0	0.00012588	0.00013711	0	6.57475e-05	0	2	2	0	1
SKIV2L	Helicase SKI2W OS=Homo sapiens GN=SKIV2L PE=1 SV=3	0	0.134559	0	0	0	0	0	0	0	0	0	0	0	9.0928e-05	9.904e-05	0	4.7492e-05	0	3	3	0	1.5
CETN2	Centrin-2 OS=Homo sapiens GN=CETN2 PE=1 SV=1	0	0.134559	0	0	0	0	0	0	0	0	0	0	0	0.00043913	0.00047831	0	0.00022936	0	2	2	0	1
TAF7	Transcription initiation factor TFIID subunit 7 OS=Homo sapiens GN=TAF7 PE=1 SV=1	0	0.134559	0	0	0	0	0	0	0	0	0	0	0	0.00021642	0.00023573	0	0.000113038	0	2	2	0	1
CNOT2	CCR4-NOT transcription complex subunit 2 OS=Homo sapiens GN=CNOT2 PE=1 SV=1	0	0.134559	0	0	0	0	0	0	0	0	0	0	0	0.00013987	0.00015235	0	7.3055e-05	0	2	2	0	1
CDC73	Parafibromin OS=Homo sapiens GN=CDC73 PE=1 SV=1	0	0.134559	0	0	0	0	0	0	0	0	0	0	0	0.00021336	0.0002324	0	0.00011144	0	3	3	0	1.5
RPN1	Dolichyl-diphosphooligosaccharide--protein glycosyltransferase subunit 1 OS=Homo sapiens GN=RPN1 PE=1 SV=1	0	0.136343	0	0	0	0	0	0	0	0	0	0	0.00040262	0	0.00033883	0	0.000185363	6	0	5	0	2.75
DNMBP	Dynamin-binding protein OS=Homo sapiens GN=DNMBP PE=1 SV=1	0	0.137054	0	0	0	0	0	0	0	0	0	0	0	0.00011974	0	0.0001458	6.6385e-05	0	5	0	6	2.75
DENND5B	DENN domain-containing protein 5B OS=Homo sapiens GN=DENND5B PE=1 SV=2	0	0.13722	0	0	0	0	0	0	0	0	0	0	0	0.00011857	9.6863e-05	0	5.38583e-05	0	4	3	0	1.75
NFKB1	Nuclear factor NF-kappa-B p105 subunit OS=Homo sapiens GN=NFKB1 PE=1 SV=2	0	0.137222	0	0	0	0	0	0	0	0	0	0	0	0.00015606	0.00012748	0	7.0885e-05	0	4	3	0	1.75
OTUD4	OTU domain-containing protein 4 OS=Homo sapiens GN=OTUD4 PE=1 SV=4	0	0.137423	0	0	0	0	0	0	0	0	0	0	0	0.0001695	0	0.0001376	7.6775e-05	0	5	0	4	2.25
C18orf25	Uncharacterized protein C18orf25 OS=Homo sapiens GN=C18orf25 PE=1 SV=2	0	0.137425	0	0	0	0	0	0	0	0	0	0	0	0.00046855	0	0.00038035	0.000212225	0	5	0	4	2.25
PFAS	Phosphoribosylformylglycinamidine synthase OS=Homo sapiens GN=PFAS PE=1 SV=4	0	0.13754	0	0	0	0	0	0	0	0	0	0	9.1327e-05	0.0001129	0	0	5.10568e-05	3	4	0	0	1.75
YBX3	Y-box-binding protein 3 OS=Homo sapiens GN=YBX3 PE=1 SV=4	0	0.137582	0	0	0	0	0	0	0	0	0	0	0.00054747	0	0.00044231	0	0.000247445	5	0	5	0	2.5
PAK2	Serine/threonine-protein kinase PAK 2 OS=Homo sapiens GN=PAK2 PE=1 SV=3	0	0.139846	0	0	0	0	0	0	0	0	0	0	0	0.00028829	0	0.00021939	0.00012692	0	4	0	3	1.75
MYO1B	Unconventional myosin-Ib OS=Homo sapiens GN=MYO1B PE=1 SV=3	0	0.140916	0	0	0	0	0	0	0	0	0	0	0.00010757	0	0.00014484	0	6.31025e-05	3	0	4	0	1.75
GNL3	Guanine nucleotide-binding protein-like 3 OS=Homo sapiens GN=GNL3 PE=1 SV=2	0	0.140917	0	0	0	0	0	0	0	0	0	0	0.00022258	0	0.0002997	0	0.00013057	3	0	4	0	1.75
KIF15	Kinesin-like protein KIF15 OS=Homo sapiens GN=KIF15 PE=1 SV=1	0	0.141134	0	0	0	0	0	0	0	0	0	0	0	8.1626e-05	0	0.00011043	4.8014e-05	0	3	0	4	1.75
PUM1	Pumilio homolog 1 OS=Homo sapiens GN=PUM1 PE=1 SV=3	0	0.141135	0	0	0	0	0	0	0	0	0	0	0	9.5528e-05	0	0.00012924	5.6192e-05	0	3	0	4	1.75
EIF5	Eukaryotic translation initiation factor 5 OS=Homo sapiens GN=EIF5 PE=1 SV=2	0	0.141136	0	0	0	0	0	0	0	0	0	0	0	0.00026287	0	0.00035564	0.000154628	0	3	0	4	1.75
MAP1A	Microtubule-associated protein 1A OS=Homo sapiens GN=MAP1A PE=1 SV=6	0	0.141136	0	0	0	0	0	0	0	0	0	0	0	4.042e-05	0	5.4685e-05	2.37763e-05	0	5	0	5	2.5
ARFIP2	Arfaptin-2 OS=Homo sapiens GN=ARFIP2 PE=1 SV=1	0	0.141136	0	0	0	0	0	0	0	0	0	0	0	0.00033225	0	0.00044951	0.00019544	0	3	0	4	1.75
PHACTR4	Phosphatase and actin regulator 4 OS=Homo sapiens GN=PHACTR4 PE=1 SV=1	0	0.141136	0	0	0	0	0	0	0	0	0	0	0	0.00016139	0	0.00021835	9.4935e-05	0	3	0	4	1.75
RALBP1	RalA-binding protein 1 OS=Homo sapiens GN=RALBP1 PE=1 SV=3	0	0.141137	0	0	0	0	0	0	0	0	0	0	0	0.00017297	0	0.00023402	0.000101747	0	3	0	4	1.75
TARS	Threonine--tRNA ligase, cytoplasmic OS=Homo sapiens GN=TARS PE=1 SV=3	0	0.141137	0	0	0	0	0	0	0	0	0	0	0	0.0001567	0	0.00021201	9.21775e-05	0	3	0	4	1.75
BAP1	Ubiquitin carboxyl-terminal hydrolase BAP1 OS=Homo sapiens GN=BAP1 PE=1 SV=2	0	0.142463	0	0	0	0	0	0	0	0	0	0	0.00011175	0.00015541	0	0	6.679e-05	2	3	0	0	1.25
GGA1	ADP-ribosylation factor-binding protein GGA1 OS=Homo sapiens GN=GGA1 PE=1 SV=1	0	0.142464	0	0	0	0	0	0	0	0	0	0	0.00012749	0.0001773	0	0	7.61975e-05	2	3	0	0	1.25
TBCE	Tubulin-specific chaperone E OS=Homo sapiens GN=TBCE PE=1 SV=1	0	0.142704	0	0	0	0	0	0	0	0	0	0	0	0	0.00015611	0.00021814	9.35625e-05	0	0	2	3	1.25
BZW1	Basic leucine zipper and W2 domain-containing protein 1 OS=Homo sapiens GN=BZW1 PE=1 SV=1	0	0.142704	0	0	0	0	0	0	0	0	0	0	0	0	0.00019635	0.00027437	0.00011768	0	0	2	3	1.25
SLC4A1AP	Kanadaptin OS=Homo sapiens GN=SLC4A1AP PE=1 SV=1	0	0.142705	0	0	0	0	0	0	0	0	0	0	0	0	0.00010335	0.00014442	6.19425e-05	0	0	2	3	1.25
INTU	Protein inturned OS=Homo sapiens GN=INTU PE=1 SV=2	0	0.142706	0	0	0	0	0	0	0	0	0	0	0	0	8.7334e-05	0.00012204	5.23435e-05	0	0	2	3	1.25
RPL31	60S ribosomal protein L31 OS=Homo sapiens GN=RPL31 PE=1 SV=1	0	0.142706	0	0	0	0	0	0	0	0	0	0	0	0	0.00065815	0.0009197	0.000394462	0	0	2	3	1.25
RBM10	RNA-binding protein 10 OS=Homo sapiens GN=RBM10 PE=1 SV=3	0	0.142708	0	0	0	0	0	0	0	0	0	0	0	0	8.8461e-05	0.00012362	5.30203e-05	0	0	2	3	1.25
RACGAP1	Rac GTPase-activating protein 1 OS=Homo sapiens GN=RACGAP1 PE=1 SV=1	0	0.14321	0	0	0	0	0	0	0	0	0	0	0.0001289	0	0	0.0001819	7.77e-05	2	0	0	3	1.25
PRPF4	U4/U6 small nuclear ribonucleoprotein Prp4 OS=Homo sapiens GN=PRPF4 PE=1 SV=2	0	0.143211	0	0	0	0	0	0	0	0	0	0	0.00015606	0	0	0.00022023	9.40725e-05	2	0	0	3	1.25
WRAP73	WD repeat-containing protein WRAP73 OS=Homo sapiens GN=WRAP73 PE=1 SV=1	0	0.143434	0	0	0	0	0	0	0	0	0	0	0.00035419	0	0	0.00024992	0.000151027	4	0	0	3	1.75
AAR2	Protein AAR2 homolog OS=Homo sapiens GN=AAR2 PE=1 SV=2	0	0.143958	0	0	0	0	0	0	0	0	0	0	0	0	0.00042848	0.00029938	0.000181965	0	0	4	3	1.75
DDX24	ATP-dependent RNA helicase DDX24 OS=Homo sapiens GN=DDX24 PE=1 SV=1	0	0.144217	0	0	0	0	0	0	0	0	0	0	0.00018967	0.00013189	0	0	8.039e-05	4	3	0	0	1.75
MKL1	MKL/myocardin-like protein 1 OS=Homo sapiens GN=MKL1 PE=1 SV=1	0	0.145767	0	0	0	0	0	0	0	0	0	0	0	0.00012169	0	8.2322e-05	5.1003e-05	0	3	0	2	1.25
NACC1	Nucleus accumbens-associated protein 1 OS=Homo sapiens GN=NACC1 PE=1 SV=1	0	0.145768	0	0	0	0	0	0	0	0	0	0	0	0.00021498	0	0.00014543	9.01025e-05	0	3	0	2	1.25
USO1	General vesicular transport factor p115 OS=Homo sapiens GN=USO1 PE=1 SV=2	0	0.145768	0	0	0	0	0	0	0	0	0	0	0	0.00011777	0	7.9669e-05	4.93597e-05	0	3	0	2	1.25
AARS	Alanine--tRNA ligase, cytoplasmic OS=Homo sapiens GN=AARS PE=1 SV=2	0	0.145768	0	0	0	0	0	0	0	0	0	0	0	0.00011704	0	7.9175e-05	4.90538e-05	0	3	0	2	1.25
MCM3AP	Germinal-center associated nuclear protein OS=Homo sapiens GN=MCM3AP PE=1 SV=2	0	0.145768	0	0	0	0	0	0	0	0	0	0	0	5.722e-05	0	3.8708e-05	2.3982e-05	0	3	0	2	1.25
PPP2R3A	Serine/threonine-protein phosphatase 2A regulatory subunit B'' subunit alpha OS=Homo sapiens GN=PPP2R3A PE=1 SV=1	0	0.145768	0	0	0	0	0	0	0	0	0	0	0	9.8518e-05	0	6.6645e-05	4.12907e-05	0	3	0	2	1.25
IFT88	Intraflagellar transport protein 88 homolog OS=Homo sapiens GN=IFT88 PE=2 SV=2	0	0.145768	0	0	0	0	0	0	0	0	0	0	0	0.00013601	0	9.2007e-05	5.70043e-05	0	3	0	2	1.25
BUB1	Mitotic checkpoint serine/threonine-protein kinase BUB1 OS=Homo sapiens GN=BUB1 PE=1 SV=1	0	0.145769	0	0	0	0	0	0	0	0	0	0	0	0.00010442	0	7.0637e-05	4.37643e-05	0	3	0	2	1.25
PARN	Poly(A)-specific ribonuclease PARN OS=Homo sapiens GN=PARN PE=1 SV=1	0	0.146045	0	0	0	0	0	0	0	0	0	0	0.00019123	0	0.00012875	0	7.9995e-05	3	0	2	0	1.25
NUP188	Nucleoporin NUP188 homolog OS=Homo sapiens GN=NUP188 PE=1 SV=1	0	0.146046	0	0	0	0	0	0	0	0	0	0	6.9866e-05	0	4.7038e-05	0	2.9226e-05	3	0	2	0	1.25
GPATCH8	G patch domain-containing protein 8 OS=Homo sapiens GN=GPATCH8 PE=1 SV=2	0	0.146046	0	0	0	0	0	0	0	0	0	0	8.1355e-05	0	5.4773e-05	0	3.4032e-05	3	0	2	0	1.25
SLU7	Pre-mRNA-splicing factor SLU7 OS=Homo sapiens GN=SLU7 PE=1 SV=2	0	0.146048	0	0	0	0	0	0	0	0	0	0	0.00020853	0	0.00014039	0	8.723e-05	3	0	2	0	1.25
CTNND1	Catenin delta-1 OS=Homo sapiens GN=CTNND1 PE=1 SV=1	0	0.146049	0	0	0	0	0	0	0	0	0	0	0.00012624	0	8.4989e-05	0	5.28073e-05	3	0	2	0	1.25
BUB3	Mitotic checkpoint protein BUB3 OS=Homo sapiens GN=BUB3 PE=1 SV=1	0	0.147515	0	0	0	0	0	0	0	0	0	0	0	0.00023028	0	0.00035049	0.000145192	0	2	0	3	1.25
HNRNPH1	Heterogeneous nuclear ribonucleoprotein H OS=Homo sapiens GN=HNRNPH1 PE=1 SV=4	0	0.147517	0	0	0	0	0	0	0	0	0	0	0	0.00016822	0	0.00025604	0.000106065	0	6	0	8	3.5
MAGED2	Melanoma-associated antigen D2 OS=Homo sapiens GN=MAGED2 PE=1 SV=2	0	0.147517	0	0	0	0	0	0	0	0	0	0	0	0.00012464	0	0.00018971	7.85875e-05	0	2	0	3	1.25
CNOT10	CCR4-NOT transcription complex subunit 10 OS=Homo sapiens GN=CNOT10 PE=1 SV=1	0	0.147517	0	0	0	0	0	0	0	0	0	0	0	0.00010152	0	0.00015452	6.401e-05	0	2	0	3	1.25
ARFGEF2	Brefeldin A-inhibited guanine nucleotide-exchange protein 2 OS=Homo sapiens GN=ARFGEF2 PE=1 SV=3	0	0.147517	0	0	0	0	0	0	0	0	0	0	0	4.2314e-05	0	6.4405e-05	2.66798e-05	0	2	0	3	1.25
SPC24	Kinetochore protein Spc24 OS=Homo sapiens GN=SPC24 PE=1 SV=2	0	0.149404	0	0	0	0	0	0	0	0	0	0	0.00062028	0	0	0.00097261	0.000398223	3	0	0	5	2
RRAGA	Ras-related GTP-binding protein A OS=Homo sapiens GN=RRAGA PE=1 SV=1	0	0.150507	0	0	0	0	0	0	0	0	0	0	0.0003904	0	0	0.00024486	0.000158815	3	0	0	2	1.25
STAU2	Double-stranded RNA-binding protein Staufen homolog 2 OS=Homo sapiens GN=STAU2 PE=1 SV=1	0	0.151173	0	0	0	0	0	0	0	0	0	0	0	0	0.0002165	0.00013446	8.774e-05	0	0	4	3	1.75
2018-09-02	Septin-2 OS=Homo sapiens GN=SEPT2 PE=1 SV=1	0	0.151174	0	0	0	0	0	0	0	0	0	0	0	0	0.00034184	0.0002123	0.000138535	0	0	3	2	1.25
RTCB	tRNA-splicing ligase RtcB homolog OS=Homo sapiens GN=RTCB PE=1 SV=1	0	0.151496	0	0	0	0	0	0	0	0	0	0	0.00024197	0.00014957	0	0	9.7885e-05	3	2	0	0	1.25
FAM171A1	Protein FAM171A1 OS=Homo sapiens GN=FAM171A1 PE=1 SV=1	0	0.151499	0	0	0	0	0	0	0	0	0	0	0.0001373	8.4866e-05	0	0	5.55415e-05	3	2	0	0	1.25
SUPT5H	Transcription elongation factor SPT5 OS=Homo sapiens GN=SUPT5H PE=1 SV=1	0	0.151501	0	0	0	0	0	0	0	0	0	0	0.00011242	6.9486e-05	0	0	4.54765e-05	3	2	0	0	1.25
HERC2	E3 ubiquitin-protein ligase HERC2 OS=Homo sapiens GN=HERC2 PE=1 SV=2	0	0.152178	0	0	0	0	0	0	0	0	0	0	0	1.5625e-05	2.5528e-05	0	1.02883e-05	0	2	3	0	1.25
FAM83D	Protein FAM83D OS=Homo sapiens GN=FAM83D PE=1 SV=3	0	0.15255	0	0	0	0	0	0	0	0	0	0	0	0.00032278	0	0.00019652	0.000129825	0	5	0	3	2
TBK1	Serine/threonine-protein kinase TBK1 OS=Homo sapiens GN=TBK1 PE=1 SV=1	0	0.15255	0	0	0	0	0	0	0	0	0	0	0	0.00025902	0	0.0001577	0.00010418	0	5	0	3	2
MAST2	Microtubule-associated serine/threonine-protein kinase 2 OS=Homo sapiens GN=MAST2 PE=1 SV=2	0	0.152551	0	0	0	0	0	0	0	0	0	0	0	0.00010502	0	6.3939e-05	4.22397e-05	0	5	0	4	2.25
WNK2	Serine/threonine-protein kinase WNK2 OS=Homo sapiens GN=WNK2 PE=1 SV=4	0	0.152551	0	0	0	0	0	0	0	0	0	0	0	8.2206e-05	0	5.0049e-05	3.30638e-05	0	8	0	8	4
PSPC1	Paraspeckle component 1 OS=Homo sapiens GN=PSPC1 PE=1 SV=1	0	0.152553	0	0	0	0	0	0	0	0	0	0	0	0.00036105	0	0.00021981	0.000145215	0	5	0	3	2
PRMT1	Protein arginine N-methyltransferase 1 OS=Homo sapiens GN=PRMT1 PE=1 SV=2	0	0.154651	0	0	0	0	0	0	0	0	0	0	0	0.00031384	0	0.00053076	0.00021115	0	3	0	5	2
HDGFL2	Hepatoma-derived growth factor-related protein 2 OS=Homo sapiens GN=HDGFL2 PE=1 SV=1	0	0.161812	0	0	0	0	0	0	0	0	0	0	0.00012141	0.00022513	0	0	8.6635e-05	2	4	0	0	1.5
USP47	Ubiquitin carboxyl-terminal hydrolase 47 OS=Homo sapiens GN=USP47 PE=1 SV=3	0	0.166955	0	0	0	0	0	0	0	0	0	0	0	0.00010986	0	5.5739e-05	4.13997e-05	0	4	0	2	1.5
AP1G1	AP-1 complex subunit gamma-1 OS=Homo sapiens GN=AP1G1 PE=1 SV=5	0	0.166955	0	0	0	0	0	0	0	0	0	0	0	0.00018377	0	9.3238e-05	6.9252e-05	0	4	0	2	1.5
DCP1A	mRNA-decapping enzyme 1A OS=Homo sapiens GN=DCP1A PE=1 SV=2	0	0.166956	0	0	0	0	0	0	0	0	0	0	0	0.00025956	0	0.00013169	9.78125e-05	0	4	0	2	1.5
TNPO1	Transportin-1 OS=Homo sapiens GN=TNPO1 PE=1 SV=2	0	0.166957	0	0	0	0	0	0	0	0	0	0	0	0.00016822	0	8.5347e-05	6.33918e-05	0	4	0	2	1.5
INPPL1	Phosphatidylinositol 3,4,5-trisphosphate 5-phosphatase 2 OS=Homo sapiens GN=INPPL1 PE=1 SV=2	0	0.166957	0	0	0	0	0	0	0	0	0	0	0	0.00012008	0	6.0923e-05	4.52508e-05	0	4	0	2	1.5
FHOD1	FH1/FH2 domain-containing protein 1 OS=Homo sapiens GN=FHOD1 PE=1 SV=3	0	0.166958	0	0	0	0	0	0	0	0	0	0	0	0.00012978	0	6.5843e-05	4.89057e-05	0	4	0	2	1.5
LRRC15	Leucine-rich repeat-containing protein 15 OS=Homo sapiens GN=LRRC15 PE=2 SV=2	0	0.16737	0	0	0	0	0	0	0	0	0	0	0.00028043	0	0.0001416	0	0.000105507	4	0	2	0	1.5
PI4KA	Phosphatidylinositol 4-kinase alpha OS=Homo sapiens GN=PI4KA PE=1 SV=4	0	0.167371	0	0	0	0	0	0	0	0	0	0	7.7511e-05	0	3.9138e-05	0	2.91623e-05	4	0	2	0	1.5
SEMG1	Semenogelin-1 OS=Homo sapiens GN=SEMG1 PE=1 SV=2	0	0.169092	0	0	0	0	0	0	0	0	0	0	0.00026449	0	0.00053421	0	0.000199675	3	0	6	0	2.25
VPS13A	Vacuolar protein sorting-associated protein 13A OS=Homo sapiens GN=VPS13A PE=1 SV=2	0	0.169511	0	0	0	0	0	0	0	0	0	0	0	2.3797e-05	0	4.8293e-05	1.80225e-05	0	2	0	4	1.5
HDAC1	Histone deacetylase 1 OS=Homo sapiens GN=HDAC1 PE=1 SV=1	0	0.169514	0	0	0	0	0	0	0	0	0	0	0	0.00023505	0	0.00047702	0.000178017	0	8	0	11	4.75
RBBP4	Histone-binding protein RBBP4 OS=Homo sapiens GN=RBBP4 PE=1 SV=3	0	0.173688	0	0	0	0	0	0	0	0	0	0	0.00038336	0	0	0.00018033	0.000140923	10	0	0	7	4.25
TRIO	Triple functional domain protein OS=Homo sapiens GN=TRIO PE=1 SV=2	0	0.183155	0	0	0	0	0	0	0	0	0	0	2.6304e-05	0	0	6.1868e-05	2.2043e-05	2	0	0	5	1.75
HNRNPL	Heterogeneous nuclear ribonucleoprotein L OS=Homo sapiens GN=HNRNPL PE=1 SV=2	0	0.187633	0	0	0	0	0	0	0	0	0	0	0	0.00032059	0	0.00013012	0.000112677	0	5	0	2	1.75
SURF6	Surfeit locus protein 6 OS=Homo sapiens GN=SURF6 PE=1 SV=3	0	0.187634	0	0	0	0	0	0	0	0	0	0	0	0.00052307	0	0.0002123	0.000183843	0	5	0	2	1.75
CEP85	Centrosomal protein of 85 kDa OS=Homo sapiens GN=CEP85 PE=1 SV=1	0	0.190477	0	0	0	0	0	0	0	0	0	0	0	9.9122e-05	0	0.00025145	8.7643e-05	0	2	0	5	1.75
SHCBP1	SHC SH2 domain-binding protein 1 OS=Homo sapiens GN=SHCBP1 PE=1 SV=3	0	0.215441	0	0	0	0	0	0	0	0	0	0	0	0.0001124	0.00036727	0	0.000119917	0	2	6	0	2
SCAF8	Protein SCAF8 OS=Homo sapiens GN=SCAF8 PE=1 SV=1	0	0.355918	0	0	0	0	0	0	0	0	0	0	6.4094e-05	0	0	0	1.60235e-05	2	0	0	0	0.5
PYCR2	Pyrroline-5-carboxylate reductase 2 OS=Homo sapiens GN=PYCR2 PE=1 SV=1	0	0.355918	0	0	0	0	0	0	0	0	0	0	0	0.00023603	0	0	5.90075e-05	0	2	0	0	0.5
PYCR3	Pyrroline-5-carboxylate reductase 3 OS=Homo sapiens GN=PYCR3 PE=1 SV=3	0	0.355918	0	0	0	0	0	0	0	0	0	0	0	0.00027566	0	0	6.8915e-05	0	2	0	0	0.5
EFHD2	EF-hand domain-containing protein D2 OS=Homo sapiens GN=EFHD2 PE=1 SV=1	0	0.355918	0	0	0	0	0	0	0	0	0	0	0	0	0	0.00047901	0.000119752	0	0	0	3	0.75
SNRNP70	U1 small nuclear ribonucleoprotein 70 kDa OS=Homo sapiens GN=SNRNP70 PE=1 SV=2	0	0.355918	0	0	0	0	0	0	0	0	0	0	0.00018642	0	0	0	4.6605e-05	2	0	0	0	0.5
MRPL37	39S ribosomal protein L37, mitochondrial OS=Homo sapiens GN=MRPL37 PE=1 SV=2	0	0.355918	0	0	0	0	0	0	0	0	0	0	0	0	0.00019449	0	4.86225e-05	0	0	2	0	0.5
MAP3K10	Mitogen-activated protein kinase kinase kinase 10 OS=Homo sapiens GN=MAP3K10 PE=1 SV=3	0	0.355918	0	0	0	0	0	0	0	0	0	0	0	0.00011876	0	0	2.969e-05	0	3	0	0	0.75
ZMYM2	Zinc finger MYM-type protein 2 OS=Homo sapiens GN=ZMYM2 PE=1 SV=1	0	0.355918	0	0	0	0	0	0	0	0	0	0	0	0	0	8.3487e-05	2.08717e-05	0	0	0	3	0.75
RTN3	Reticulon-3 OS=Homo sapiens GN=RTN3 PE=1 SV=2	0	0.355918	0	0	0	0	0	0	0	0	0	0	0	0	0.00011958	0	2.9895e-05	0	0	3	0	0.75
OBSL1	Obscurin-like protein 1 OS=Homo sapiens GN=OBSL1 PE=1 SV=4	0	0.355918	0	0	0	0	0	0	0	0	0	0	0	0	0	6.0634e-05	1.51585e-05	0	0	0	3	0.75
RPL35A	60S ribosomal protein L35a OS=Homo sapiens GN=RPL35A PE=1 SV=2	0	0.355918	0	0	0	0	0	0	0	0	0	0	0	0.00068664	0	0	0.00017166	0	2	0	0	0.5
NUDT5	ADP-sugar pyrophosphatase OS=Homo sapiens GN=NUDT5 PE=1 SV=1	0	0.355918	0	0	0	0	0	0	0	0	0	0	0	0.00034489	0	0	8.62225e-05	0	2	0	0	0.5
SIN3A	Paired amphipathic helix protein Sin3a OS=Homo sapiens GN=SIN3A PE=1 SV=2	0	0.355918	0	0	0	0	0	0	0	0	0	0	0	5.9333e-05	0	0	1.48333e-05	0	2	0	0	0.5
SMARCC2	SWI/SNF complex subunit SMARCC2 OS=Homo sapiens GN=SMARCC2 PE=1 SV=1	0	0.355918	0	0	0	0	0	0	0	0	0	0	0	0	0	0.00012626	3.1565e-05	0	0	0	4	1
PGD	6-phosphogluconate dehydrogenase, decarboxylating OS=Homo sapiens GN=PGD PE=1 SV=3	0	0.355918	0	0	0	0	0	0	0	0	0	0	0	0	0	0.00023802	5.9505e-05	0	0	0	3	0.75
MCM7	DNA replication licensing factor MCM7 OS=Homo sapiens GN=MCM7 PE=1 SV=4	0	0.355918	0	0	0	0	0	0	0	0	0	0	0	0.00015757	0	0	3.93925e-05	0	3	0	0	0.75
EIF4E2	Eukaryotic translation initiation factor 4E type 2 OS=Homo sapiens GN=EIF4E2 PE=1 SV=1	0	0.355918	0	0	0	0	0	0	0	0	0	0	0	0.00046243	0	0	0.000115608	0	3	0	0	0.75
PPFIA1	Liprin-alpha-1 OS=Homo sapiens GN=PPFIA1 PE=1 SV=1	0	0.355918	0	0	0	0	0	0	0	0	0	0	0	0	6.8443e-05	0	1.71107e-05	0	0	2	0	0.5
CEP164	Centrosomal protein of 164 kDa OS=Homo sapiens GN=CEP164 PE=1 SV=3	0	0.355918	0	0	0	0	0	0	0	0	0	0	0	0	0	5.2494e-05	1.31235e-05	0	0	0	2	0.5
MPP1	55 kDa erythrocyte membrane protein OS=Homo sapiens GN=MPP1 PE=1 SV=2	0	0.355918	0	0	0	0	0	0	0	0	0	0	0	0	0.00026481	0	6.62025e-05	0	0	3	0	0.75
PDXDC1	Pyridoxal-dependent decarboxylase domain-containing protein 1 OS=Homo sapiens GN=PDXDC1 PE=1 SV=2	0	0.355918	0	0	0	0	0	0	0	0	0	0	0	0.00023963	0	0	5.99075e-05	0	5	0	0	1.25
PIK3R4	Phosphoinositide 3-kinase regulatory subunit 4 OS=Homo sapiens GN=PIK3R4 PE=1 SV=3	0	0.355918	0	0	0	0	0	0	0	0	0	0	0	0	0	8.4656e-05	2.1164e-05	0	0	0	3	0.75
PGAM5	Serine/threonine-protein phosphatase PGAM5, mitochondrial OS=Homo sapiens GN=PGAM5 PE=1 SV=2	0	0.355918	0	0	0	0	0	0	0	0	0	0	0	0.00026135	0	0	6.53375e-05	0	2	0	0	0.5
PAPOLA	Poly(A) polymerase alpha OS=Homo sapiens GN=PAPOLA PE=1 SV=4	0	0.355918	0	0	0	0	0	0	0	0	0	0	0	0	0	0.00015431	3.85775e-05	0	0	0	3	0.75
AAAS	Aladin OS=Homo sapiens GN=AAAS PE=1 SV=1	0	0.355918	0	0	0	0	0	0	0	0	0	0	0	0	0.00022601	0	5.65025e-05	0	0	3	0	0.75
EXOSC5	Exosome complex component RRP46 OS=Homo sapiens GN=EXOSC5 PE=1 SV=1	0	0.355918	0	0	0	0	0	0	0	0	0	0	0	0	0	0.00032613	8.15325e-05	0	0	0	2	0.5
NOL8	Nucleolar protein 8 OS=Homo sapiens GN=NOL8 PE=1 SV=1	0	0.355918	0	0	0	0	0	0	0	0	0	0	6.9806e-05	0	0	0	1.74515e-05	2	0	0	0	0.5
CEP78	Centrosomal protein of 78 kDa OS=Homo sapiens GN=CEP78 PE=1 SV=1	0	0.355918	0	0	0	0	0	0	0	0	0	0	0	0	0	0.00011124	2.781e-05	0	0	0	2	0.5
SLIT2	Slit homolog 2 protein OS=Homo sapiens GN=SLIT2 PE=1 SV=1	0	0.355918	0	0	0	0	0	0	0	0	0	0	0	0	8.0709e-05	0	2.01773e-05	0	0	3	0	0.75
SYNCRIP	Heterogeneous nuclear ribonucleoprotein Q OS=Homo sapiens GN=SYNCRIP PE=1 SV=2	0	0.355918	0	0	0	0	0	0	0	0	0	0	0.00013076	0	0	0	3.269e-05	5	0	0	0	1.25
NKRF	NF-kappa-B-repressing factor OS=Homo sapiens GN=NKRF PE=1 SV=2	0	0.355918	0	0	0	0	0	0	0	0	0	0	0	0.00010946	0	0	2.7365e-05	0	2	0	0	0.5
RNPS1	RNA-binding protein with serine-rich domain 1 OS=Homo sapiens GN=RNPS1 PE=1 SV=1	0	0.355918	0	0	0	0	0	0	0	0	0	0	0	0	0	0.00037693	9.42325e-05	0	0	0	3	0.75
NANP	N-acylneuraminate-9-phosphatase OS=Homo sapiens GN=NANP PE=1 SV=1	0	0.355918	0	0	0	0	0	0	0	0	0	0	0	0	0.00033173	0	8.29325e-05	0	0	2	0	0.5
POLR3C	DNA-directed RNA polymerase III subunit RPC3 OS=Homo sapiens GN=POLR3C PE=1 SV=1	0	0.355918	0	0	0	0	0	0	0	0	0	0	0	0.00014144	0	0	3.536e-05	0	2	0	0	0.5
AAK1	AP2-associated protein kinase 1 OS=Homo sapiens GN=AAK1 PE=1 SV=3	0	0.355918	0	0	0	0	0	0	0	0	0	0	8.477e-05	0	0	0	2.11925e-05	2	0	0	0	0.5
PRR5	Proline-rich protein 5 OS=Homo sapiens GN=PRR5 PE=1 SV=1	0	0.355918	0	0	0	0	0	0	0	0	0	0	0	0	0	0.00049382	0.000123455	0	0	0	5	1.25
WARS	Tryptophan--tRNA ligase, cytoplasmic OS=Homo sapiens GN=WARS PE=1 SV=2	0	0.355918	0	0	0	0	0	0	0	0	0	0	0	0	0	0.00024408	6.102e-05	0	0	0	3	0.75
NCOR2	Nuclear receptor corepressor 2 OS=Homo sapiens GN=NCOR2 PE=1 SV=2	0	0.355918	0	0	0	0	0	0	0	0	0	0	0	0	0	3.0353e-05	7.58825e-06	0	0	0	2	0.5
SETD1B	Histone-lysine N-methyltransferase SETD1B OS=Homo sapiens GN=SETD1B PE=1 SV=3	0	0.355918	0	0	0	0	0	0	0	0	0	0	0	3.8419e-05	0	0	9.60475e-06	0	3	0	0	0.75
STAM	Signal transducing adapter molecule 1 OS=Homo sapiens GN=STAM PE=1 SV=3	0	0.355918	0	0	0	0	0	0	0	0	0	0	0	0.00013987	0	0	3.49675e-05	0	2	0	0	0.5
GNAS	Guanine nucleotide-binding protein G(s) subunit alpha isoforms XLas OS=Homo sapiens GN=GNAS PE=1 SV=2	0	0.355918	0	0	0	0	0	0	0	0	0	0	7.8557e-05	0	0	0	1.96393e-05	2	0	0	0	0.5
SNRPA1	U2 small nuclear ribonucleoprotein A' OS=Homo sapiens GN=SNRPA1 PE=1 SV=2	0	0.355918	0	0	0	0	0	0	0	0	0	0	0	0	0.00048393	0	0.000120982	0	0	3	0	0.75
MYO6	Unconventional myosin-VI OS=Homo sapiens GN=MYO6 PE=1 SV=4	0	0.355918	0	0	0	0	0	0	0	0	0	0	0	5.837e-05	0	0	1.45925e-05	0	2	0	0	0.5
GNL2	Nucleolar GTP-binding protein 2 OS=Homo sapiens GN=GNL2 PE=1 SV=1	0	0.355918	0	0	0	0	0	0	0	0	0	0	0	0	0.00016881	0	4.22025e-05	0	0	3	0	0.75
CDC37	Hsp90 co-chaperone Cdc37 OS=Homo sapiens GN=CDC37 PE=1 SV=1	0	0.355918	0	0	0	0	0	0	0	0	0	0	0	0.00039963	0	0	9.99075e-05	0	4	0	0	1
ZMYM4	Zinc finger MYM-type protein 4 OS=Homo sapiens GN=ZMYM4 PE=1 SV=1	0	0.355918	0	0	0	0	0	0	0	0	0	0	5.2625e-05	0	0	0	1.31562e-05	2	0	0	0	0.5
MYO9B	Unconventional myosin-IXb OS=Homo sapiens GN=MYO9B PE=1 SV=3	0	0.355918	0	0	0	0	0	0	0	0	0	0	0	3.5017e-05	0	0	8.75425e-06	0	2	0	0	0.5
ARHGEF28	Rho guanine nucleotide exchange factor 28 OS=Homo sapiens GN=ARHGEF28 PE=1 SV=3	0	0.355918	0	0	0	0	0	0	0	0	0	0	0	0	0	4.4951e-05	1.12377e-05	0	0	0	2	0.5
WDR7	WD repeat-containing protein 7 OS=Homo sapiens GN=WDR7 PE=1 SV=2	0	0.355918	0	0	0	0	0	0	0	0	0	0	5.4674e-05	0	0	0	1.36685e-05	2	0	0	0	0.5
GPHN	Gephyrin OS=Homo sapiens GN=GPHN PE=1 SV=1	0	0.355918	0	0	0	0	0	0	0	0	0	0	0	0.00010262	0	0	2.5655e-05	0	2	0	0	0.5
NUP98	Nuclear pore complex protein Nup98-Nup96 OS=Homo sapiens GN=NUP98 PE=1 SV=4	0	0.355918	0	0	0	0	0	0	0	0	0	0	0	0	4.5277e-05	0	1.13193e-05	0	0	2	0	0.5
NUP205	Nuclear pore complex protein Nup205 OS=Homo sapiens GN=NUP205 PE=1 SV=3	0	0.355918	0	0	0	0	0	0	0	0	0	0	0	0	4.0889e-05	0	1.02223e-05	0	0	2	0	0.5
SAMHD1	Deoxynucleoside triphosphate triphosphohydrolase SAMHD1 OS=Homo sapiens GN=SAMHD1 PE=1 SV=2	0	0.355918	0	0	0	0	0	0	0	0	0	0	0.00013013	0	0	0	3.25325e-05	2	0	0	0	0.5
ESF1	ESF1 homolog OS=Homo sapiens GN=ESF1 PE=1 SV=1	0	0.355918	0	0	0	0	0	0	0	0	0	0	0	0	0	9.006e-05	2.2515e-05	0	0	0	2	0.5
IQSEC1	IQ motif and SEC7 domain-containing protein 1 OS=Homo sapiens GN=IQSEC1 PE=1 SV=1	0	0.355918	0	0	0	0	0	0	0	0	0	0	0	0.00015687	0	0	3.92175e-05	0	4	0	0	1
EXOSC1	Exosome complex component CSL4 OS=Homo sapiens GN=EXOSC1 PE=1 SV=1	0	0.355918	0	0	0	0	0	0	0	0	0	0	0	0.00038734	0	0	9.6835e-05	0	2	0	0	0.5
SF3B5	Splicing factor 3B subunit 5 OS=Homo sapiens GN=SF3B5 PE=1 SV=1	0	0.355918	0	0	0	0	0	0	0	0	0	0	0	0	0	0.00089118	0.000222795	0	0	0	2	0.5
SNRNP40	U5 small nuclear ribonucleoprotein 40 kDa protein OS=Homo sapiens GN=SNRNP40 PE=1 SV=1	0	0.355918	0	0	0	0	0	0	0	0	0	0	0	0	0	0.00021468	5.367e-05	0	0	0	2	0.5
GCFC2	GC-rich sequence DNA-binding factor 2 OS=Homo sapiens GN=GCFC2 PE=1 SV=2	0	0.355918	0	0	0	0	0	0	0	0	0	0	0	0.00014507	0	0	3.62675e-05	0	3	0	0	0.75
SPAG7	Sperm-associated antigen 7 OS=Homo sapiens GN=SPAG7 PE=1 SV=2	0	0.355918	0	0	0	0	0	0	0	0	0	0	0	0.0004991	0	0	0.000124775	0	3	0	0	0.75
TRPS1	Zinc finger transcription factor Trps1 OS=Homo sapiens GN=TRPS1 PE=1 SV=2	0	0.355918	0	0	0	0	0	0	0	0	0	0	0	8.8444e-05	0	0	2.2111e-05	0	3	0	0	0.75
LBR	Lamin-B receptor OS=Homo sapiens GN=LBR PE=1 SV=2	0	0.355918	0	0	0	0	0	0	0	0	0	0	0	0	0	0.00012462	3.1155e-05	0	0	0	2	0.5
USP5	Ubiquitin carboxyl-terminal hydrolase 5 OS=Homo sapiens GN=USP5 PE=1 SV=2	0	0.355918	0	0	0	0	0	0	0	0	0	0	0	0	9.5885e-05	0	2.39712e-05	0	0	2	0	0.5
RPP25L	Ribonuclease P protein subunit p25-like protein OS=Homo sapiens GN=RPP25L PE=1 SV=1	0	0.355918	0	0	0	0	0	0	0	0	0	0	0	0	0.00050472	0	0.00012618	0	0	2	0	0.5
FAAP20	Fanconi anemia core complex-associated protein 20 OS=Homo sapiens GN=FAAP20 PE=1 SV=2	0	0.355918	0	0	0	0	0	0	0	0	0	0	0.00045258	0	0	0	0.000113145	2	0	0	0	0.5
PRKAG1	5'-AMP-activated protein kinase subunit gamma-1 OS=Homo sapiens GN=PRKAG1 PE=1 SV=1	0	0.355918	0	0	0	0	0	0	0	0	0	0	0	0.00034228	0	0	8.557e-05	0	3	0	0	0.75
SUPT7L	STAGA complex 65 subunit gamma OS=Homo sapiens GN=SUPT7L PE=1 SV=1	0	0.355918	0	0	0	0	0	0	0	0	0	0	0.00029516	0	0	0	7.379e-05	3	0	0	0	0.75
MPHOSPH9	M-phase phosphoprotein 9 OS=Homo sapiens GN=MPHOSPH9 PE=1 SV=4	0	0.355918	0	0	0	0	0	0	0	0	0	0	0	6.3847e-05	0	0	1.59618e-05	0	2	0	0	0.5
CDV3	Protein CDV3 homolog OS=Homo sapiens GN=CDV3 PE=1 SV=1	0	0.355918	0	0	0	0	0	0	0	0	0	0	0	0.00029276	0	0	7.319e-05	0	2	0	0	0.5
FIP1L1	Pre-mRNA 3'-end-processing factor FIP1 OS=Homo sapiens GN=FIP1L1 PE=1 SV=1	0	0.355918	0	0	0	0	0	0	0	0	0	0	0.00020572	0	0	0	5.143e-05	3	0	0	0	0.75
MRPS34	28S ribosomal protein S34, mitochondrial OS=Homo sapiens GN=MRPS34 PE=1 SV=2	0	0.355918	0	0	0	0	0	0	0	0	0	0	0	0	0.00037738	0	9.4345e-05	0	0	2	0	0.5
PRPF38A	Pre-mRNA-splicing factor 38A OS=Homo sapiens GN=PRPF38A PE=1 SV=1	0	0.355918	0	0	0	0	0	0	0	0	0	0	0	0	0	0.00024565	6.14125e-05	0	0	0	2	0.5
ERLIN2	Erlin-2 OS=Homo sapiens GN=ERLIN2 PE=1 SV=1	0	0.355918	0	0	0	0	0	0	0	0	0	0	0	0	0.00036402	0	9.1005e-05	0	0	3	0	0.75
PRKACB	cAMP-dependent protein kinase catalytic subunit beta OS=Homo sapiens GN=PRKACB PE=1 SV=2	0	0.355918	0	0	0	0	0	0	0	0	0	0	0	0	0	0.00021835	5.45875e-05	0	0	0	6	1.5
RPRD2	Regulation of nuclear pre-mRNA domain-containing protein 2 OS=Homo sapiens GN=RPRD2 PE=1 SV=1	0	0.355918	0	0	0	0	0	0	0	0	0	0	0	0	5.631e-05	0	1.40775e-05	0	0	2	0	0.5
SPC25	Kinetochore protein Spc25 OS=Homo sapiens GN=SPC25 PE=1 SV=1	0	0.355918	0	0	0	0	0	0	0	0	0	0	0	0	0	0.00034215	8.55375e-05	0	0	0	2	0.5
DIABLO	Diablo homolog, mitochondrial OS=Homo sapiens GN=DIABLO PE=1 SV=1	0	0.355918	0	0	0	0	0	0	0	0	0	0	0	0	0	0.00048101	0.000120252	0	0	0	3	0.75
DOPEY1	Protein dopey-1 OS=Homo sapiens GN=DOPEY1 PE=2 SV=1	0	0.355918	0	0	0	0	0	0	0	0	0	0	0	0	5.0062e-05	0	1.25155e-05	0	0	3	0	0.75
PEAK1	Pseudopodium-enriched atypical kinase 1 OS=Homo sapiens GN=PEAK1 PE=1 SV=4	0	0.355918	0	0	0	0	0	0	0	0	0	0	6.9986e-05	0	0	0	1.74965e-05	3	0	0	0	0.75
WDR33	pre-mRNA 3' end processing protein WDR33 OS=Homo sapiens GN=WDR33 PE=1 SV=2	0	0.355918	0	0	0	0	0	0	0	0	0	0	0	5.6535e-05	0	0	1.41337e-05	0	2	0	0	0.5
DYNC1LI2	Cytoplasmic dynein 1 light intermediate chain 2 OS=Homo sapiens GN=DYNC1LI2 PE=1 SV=1	0	0.355918	0	0	0	0	0	0	0	0	0	0	0	0	0	0.00015578	3.8945e-05	0	0	0	2	0.5
POLR3B	DNA-directed RNA polymerase III subunit RPC2 OS=Homo sapiens GN=POLR3B PE=1 SV=2	0	0.355918	0	0	0	0	0	0	0	0	0	0	0	6.6664e-05	0	0	1.6666e-05	0	2	0	0	0.5
GSE1	Genetic suppressor element 1 OS=Homo sapiens GN=GSE1 PE=1 SV=3	0	0.355918	0	0	0	0	0	0	0	0	0	0	6.6938e-05	0	0	0	1.67345e-05	2	0	0	0	0.5
NUP58	Nucleoporin p58/p45 OS=Homo sapiens GN=NUP58 PE=1 SV=1	0	0.355918	0	0	0	0	0	0	0	0	0	0	0	0	0	0.00012795	3.19875e-05	0	0	0	2	0.5
POLR2C	DNA-directed RNA polymerase II subunit RPB3 OS=Homo sapiens GN=POLR2C PE=1 SV=2	0	0.355918	0	0	0	0	0	0	0	0	0	0	0	0	0	0.0002787	6.9675e-05	0	0	0	2	0.5
PTPN11	Tyrosine-protein phosphatase non-receptor type 11 OS=Homo sapiens GN=PTPN11 PE=1 SV=2	0	0.355918	0	0	0	0	0	0	0	0	0	0	0	0	0	0.00012838	3.2095e-05	0	0	0	2	0.5
CCDC6	Coiled-coil domain-containing protein 6 OS=Homo sapiens GN=CCDC6 PE=1 SV=2	0	0.355918	0	0	0	0	0	0	0	0	0	0	0	0	0.00017356	0	4.339e-05	0	0	2	0	0.5
RFC2	Replication factor C subunit 2 OS=Homo sapiens GN=RFC2 PE=1 SV=3	0	0.355918	0	0	0	0	0	0	0	0	0	0	0	0.00021336	0	0	5.334e-05	0	2	0	0	0.5
N4BP1	NEDD4-binding protein 1 OS=Homo sapiens GN=N4BP1 PE=1 SV=4	0	0.355918	0	0	0	0	0	0	0	0	0	0	0	0.00012645	0	0	3.16125e-05	0	3	0	0	0.75
ACTR3	Actin-related protein 3 OS=Homo sapiens GN=ACTR3 PE=1 SV=3	0	0.355918	0	0	0	0	0	0	0	0	0	0	0.00019489	0	0	0	4.87225e-05	2	0	0	0	0.5
LRRC40	Leucine-rich repeat-containing protein 40 OS=Homo sapiens GN=LRRC40 PE=1 SV=1	0	0.355918	0	0	0	0	0	0	0	0	0	0	0	0	0	0.00012731	3.18275e-05	0	0	0	2	0.5
CAMK2G	Calcium/calmodulin-dependent protein kinase type II subunit gamma OS=Homo sapiens GN=CAMK2G PE=1 SV=3	0	0.355918	0	0	0	0	0	0	0	0	0	0	0	0	0	0.00020603	5.15075e-05	0	0	0	3	0.75
YPEL5	Protein yippee-like 5 OS=Homo sapiens GN=YPEL5 PE=1 SV=1	0	0.355918	0	0	0	0	0	0	0	0	0	0	0	0	0.00067991	0	0.000169978	0	0	2	0	0.5
SMARCE1	SWI/SNF-related matrix-associated actin-dependent regulator of chromatin subfamily E member 1 OS=Homo sapiens GN=SMARCE1 PE=1 SV=2	0	0.355918	0	0	0	0	0	0	0	0	0	0	0	0.00045943	0	0	0.000114857	0	5	0	0	1.25
RRM1	Ribonucleoside-diphosphate reductase large subunit OS=Homo sapiens GN=RRM1 PE=1 SV=1	0	0.355918	0	0	0	0	0	0	0	0	0	0	0.00010286	0	0	0	2.5715e-05	2	0	0	0	0.5
PPP1R12A	Protein phosphatase 1 regulatory subunit 12A OS=Homo sapiens GN=PPP1R12A PE=1 SV=1	0	0.355918	0	0	0	0	0	0	0	0	0	0	0	7.3331e-05	0	0	1.83328e-05	0	2	0	0	0.5
HTATSF1	HIV Tat-specific factor 1 OS=Homo sapiens GN=HTATSF1 PE=1 SV=1	0	0.355918	0	0	0	0	0	0	0	0	0	0	0	0.00010004	0	0	2.501e-05	0	2	0	0	0.5
SRPRA	Signal recognition particle receptor subunit alpha OS=Homo sapiens GN=SRPRA PE=1 SV=2	0	0.355918	0	0	0	0	0	0	0	0	0	0	0	0	0.00012895	0	3.22375e-05	0	0	2	0	0.5
DDX18	ATP-dependent RNA helicase DDX18 OS=Homo sapiens GN=DDX18 PE=1 SV=2	0	0.355918	0	0	0	0	0	0	0	0	0	0	0.00018238	0	0	0	4.5595e-05	3	0	0	0	0.75
EDC3	Enhancer of mRNA-decapping protein 3 OS=Homo sapiens GN=EDC3 PE=1 SV=1	0	0.355918	0	0	0	0	0	0	0	0	0	0	0	0.00022302	0	0	5.5755e-05	0	3	0	0	0.75
ZNF281	Zinc finger protein 281 OS=Homo sapiens GN=ZNF281 PE=1 SV=1	0	0.355918	0	0	0	0	0	0	0	0	0	0	0	8.4392e-05	0	0	2.1098e-05	0	2	0	0	0.5
PUM3	Pumilio homolog 3 OS=Homo sapiens GN=PUM3 PE=1 SV=3	0	0.355918	0	0	0	0	0	0	0	0	0	0	0	0	0.00012696	0	3.174e-05	0	0	2	0	0.5
QSER1	Glutamine and serine-rich protein 1 OS=Homo sapiens GN=QSER1 PE=1 SV=3	0	0.355918	0	0	0	0	0	0	0	0	0	0	0	4.3534e-05	0	0	1.08835e-05	0	2	0	0	0.5
SPATA5L1	Spermatogenesis-associated protein 5-like protein 1 OS=Homo sapiens GN=SPATA5L1 PE=1 SV=2	0	0.355918	0	0	0	0	0	0	0	0	0	0	0	0.00015046	0	0	3.7615e-05	0	3	0	0	0.75
SDE2	Replication stress response regulator SDE2 OS=Homo sapiens GN=SDE2 PE=1 SV=1	0	0.355918	0	0	0	0	0	0	0	0	0	0	0	0	0	0.00016994	4.2485e-05	0	0	0	2	0.5
RPS28	40S ribosomal protein S28 OS=Homo sapiens GN=RPS28 PE=1 SV=1	0	0.355918	0	0	0	0	0	0	0	0	0	0	0	0	0.0011923	0	0.000298075	0	0	2	0	0.5
LIG1	DNA ligase 1 OS=Homo sapiens GN=LIG1 PE=1 SV=1	0	0.355918	0	0	0	0	0	0	0	0	0	0	0	0	0	8.3397e-05	2.08493e-05	0	0	0	2	0.5
ABI1	Abl interactor 1 OS=Homo sapiens GN=ABI1 PE=1 SV=4	0	0.355918	0	0	0	0	0	0	0	0	0	0	0.00016036	0	0	0	4.009e-05	2	0	0	0	0.5
SAMD4B	Protein Smaug homolog 2 OS=Homo sapiens GN=SAMD4B PE=1 SV=1	0	0.355918	0	0	0	0	0	0	0	0	0	0	0	0.00010883	0	0	2.72075e-05	0	2	0	0	0.5
GTF2F2	General transcription factor IIF subunit 2 OS=Homo sapiens GN=GTF2F2 PE=1 SV=2	0	0.355918	0	0	0	0	0	0	0	0	0	0	0	0	0	0.0003078	7.695e-05	0	0	0	2	0.5
CIR1	Corepressor interacting with RBPJ 1 OS=Homo sapiens GN=CIR1 PE=1 SV=1	0	0.355918	0	0	0	0	0	0	0	0	0	0	0	0	0	0.00025547	6.38675e-05	0	0	0	3	0.75
EWSR1	RNA-binding protein EWS OS=Homo sapiens GN=EWSR1 PE=1 SV=1	0	0.355918	0	0	0	0	0	0	0	0	0	0	0	0	0.00012541	0	3.13525e-05	0	0	2	0	0.5
CALD1	Caldesmon OS=Homo sapiens GN=CALD1 PE=1 SV=3	0	0.355918	0	0	0	0	0	0	0	0	0	0	0	0	0.00010374	0	2.5935e-05	0	0	2	0	0.5
DDOST	Dolichyl-diphosphooligosaccharide--protein glycosyltransferase 48 kDa subunit OS=Homo sapiens GN=DDOST PE=1 SV=4	0	0.355918	0	0	0	0	0	0	0	0	0	0	0.00026797	0	0	0	6.69925e-05	3	0	0	0	0.75
NFKBIE	NF-kappa-B inhibitor epsilon OS=Homo sapiens GN=NFKBIE PE=1 SV=3	0	0.355918	0	0	0	0	0	0	0	0	0	0	0	0.00022659	0	0	5.66475e-05	0	3	0	0	0.75
MAP7	Ensconsin OS=Homo sapiens GN=MAP7 PE=1 SV=1	0	0.355918	0	0	0	0	0	0	0	0	0	0	0	0	0.00016476	0	4.119e-05	0	0	3	0	0.75
RAE1	mRNA export factor OS=Homo sapiens GN=RAE1 PE=1 SV=1	0	0.355918	0	0	0	0	0	0	0	0	0	0	0	0	0	0.00020826	5.2065e-05	0	0	0	2	0.5
KIDINS220	Kinase D-interacting substrate of 220 kDa OS=Homo sapiens GN=KIDINS220 PE=1 SV=3	0	0.355918	0	0	0	0	0	0	0	0	0	0	0	4.2649e-05	0	0	1.06622e-05	0	2	0	0	0.5
IPO9	Importin-9 OS=Homo sapiens GN=IPO9 PE=1 SV=3	0	0.355918	0	0	0	0	0	0	0	0	0	0	0	7.2556e-05	0	0	1.8139e-05	0	2	0	0	0.5
DSG2	Desmoglein-2 OS=Homo sapiens GN=DSG2 PE=1 SV=2	0	0.355918	0	0	0	0	0	0	0	0	0	0	0	6.7559e-05	0	0	1.68897e-05	0	2	0	0	0.5
MOCS2	Molybdopterin synthase catalytic subunit OS=Homo sapiens GN=MOCS2 PE=1 SV=1	0	0.355918	0	0	0	0	0	0	0	0	0	0	0	0.00040176	0	0	0.00010044	0	2	0	0	0.5
INTS1	Integrator complex subunit 1 OS=Homo sapiens GN=INTS1 PE=1 SV=2	0	0.355918	0	0	0	0	0	0	0	0	0	0	0	3.4489e-05	0	0	8.62225e-06	0	2	0	0	0.5
MOV10	Putative helicase MOV-10 OS=Homo sapiens GN=MOV10 PE=1 SV=2	0	0.355918	0	0	0	0	0	0	0	0	0	0	8.122e-05	0	0	0	2.0305e-05	2	0	0	0	0.5
YJ005	Uncharacterized protein FLJ45252 OS=Homo sapiens PE=2 SV=2	0	0.355918	0	0	0	0	0	0	0	0	0	0	0	0.00021276	0	0	5.319e-05	0	2	0	0	0.5
DDX1	ATP-dependent RNA helicase DDX1 OS=Homo sapiens GN=DDX1 PE=1 SV=2	0	0.355918	0	0	0	0	0	0	0	0	0	0	0.00011009	0	0	0	2.75225e-05	2	0	0	0	0.5
LSM3	U6 snRNA-associated Sm-like protein LSm3 OS=Homo sapiens GN=LSM3 PE=1 SV=2	0	0.355918	0	0	0	0	0	0	0	0	0	0	0	0	0.00080656	0	0.00020164	0	0	2	0	0.5
PTPN1	Tyrosine-protein phosphatase non-receptor type 1 OS=Homo sapiens GN=PTPN1 PE=1 SV=1	0	0.355918	0	0	0	0	0	0	0	0	0	0	0.00028091	0	0	0	7.02275e-05	3	0	0	0	0.75
SEC24A	Protein transport protein Sec24A OS=Homo sapiens GN=SEC24A PE=1 SV=2	0	0.355918	0	0	0	0	0	0	0	0	0	0	0	6.9104e-05	0	0	1.7276e-05	0	2	0	0	0.5
RTRAF	RNA transcription, translation and transport factor protein OS=Homo sapiens GN=RTRAF PE=1 SV=1	0	0.355918	0	0	0	0	0	0	0	0	0	0	0.00033387	0	0	0	8.34675e-05	2	0	0	0	0.5
WDR92	WD repeat-containing protein 92 OS=Homo sapiens GN=WDR92 PE=1 SV=1	0	0.355918	0	0	0	0	0	0	0	0	0	0	0	0.00031736	0	0	7.934e-05	0	3	0	0	0.75
COPG2	Coatomer subunit gamma-2 OS=Homo sapiens GN=COPG2 PE=1 SV=1	0	0.355918	0	0	0	0	0	0	0	0	0	0	0	0	0	8.7992e-05	2.1998e-05	0	0	0	2	0.5
HADHB	Trifunctional enzyme subunit beta, mitochondrial OS=Homo sapiens GN=HADHB PE=1 SV=3	0	0.355918	0	0	0	0	0	0	0	0	0	0	0	0	0.00017356	0	4.339e-05	0	0	2	0	0.5
TKT	Transketolase OS=Homo sapiens GN=TKT PE=1 SV=3	0	0.355918	0	0	0	0	0	0	0	0	0	0	0	0.00012124	0	0	3.031e-05	0	2	0	0	0.5
HSBP1	Heat shock factor-binding protein 1 OS=Homo sapiens GN=HSBP1 PE=1 SV=1	0	0.355918	0	0	0	0	0	0	0	0	0	0	0.0010719	0	0	0	0.000267975	2	0	0	0	0.5
SIX5	Homeobox protein SIX5 OS=Homo sapiens GN=SIX5 PE=1 SV=3	0	0.355918	0	0	0	0	0	0	0	0	0	0	0	0	0	0.00010371	2.59275e-05	0	0	0	2	0.5
PCYT1A	Choline-phosphate cytidylyltransferase A OS=Homo sapiens GN=PCYT1A PE=1 SV=2	0	0.355918	0	0	0	0	0	0	0	0	0	0	0	0.00020581	0	0	5.14525e-05	0	2	0	0	0.5
NOC4L	Nucleolar complex protein 4 homolog OS=Homo sapiens GN=NOC4L PE=1 SV=1	0	0.355918	0	0	0	0	0	0	0	0	0	0	0.00023681	0	0	0	5.92025e-05	3	0	0	0	0.75
CCDC124	Coiled-coil domain-containing protein 124 OS=Homo sapiens GN=CCDC124 PE=1 SV=1	0	0.355918	0	0	0	0	0	0	0	0	0	0	0	0	0.00036892	0	9.223e-05	0	0	2	0	0.5
E2F4	Transcription factor E2F4 OS=Homo sapiens GN=E2F4 PE=1 SV=2	0	0.355918	0	0	0	0	0	0	0	0	0	0	0	0	0	0.00018557	4.63925e-05	0	0	0	2	0.5
TTF2	Transcription termination factor 2 OS=Homo sapiens GN=TTF2 PE=1 SV=2	0	0.355918	0	0	0	0	0	0	0	0	0	0	0	6.5001e-05	0	0	1.62502e-05	0	2	0	0	0.5
CPSF2	Cleavage and polyadenylation specificity factor subunit 2 OS=Homo sapiens GN=CPSF2 PE=1 SV=2	0	0.355918	0	0	0	0	0	0	0	0	0	0	0.00010417	0	0	0	2.60425e-05	2	0	0	0	0.5
LRRFIP1	Leucine-rich repeat flightless-interacting protein 1 OS=Homo sapiens GN=LRRFIP1 PE=1 SV=2	0	0.355918	0	0	0	0	0	0	0	0	0	0	0	0	0	9.4853e-05	2.37132e-05	0	0	0	2	0.5
CCNK	Cyclin-K OS=Homo sapiens GN=CCNK PE=1 SV=2	0	0.355918	0	0	0	0	0	0	0	0	0	0	0.00014046	0	0	0	3.5115e-05	2	0	0	0	0.5
CDC23	Cell division cycle protein 23 homolog OS=Homo sapiens GN=CDC23 PE=1 SV=3	0	0.355918	0	0	0	0	0	0	0	0	0	0	0	0	0.0001378	0	3.445e-05	0	0	2	0	0.5
TARDBP	TAR DNA-binding protein 43 OS=Homo sapiens GN=TARDBP PE=1 SV=1	0	0.355918	0	0	0	0	0	0	0	0	0	0	0	0.00018244	0	0	4.561e-05	0	2	0	0	0.5
ANKLE2	Ankyrin repeat and LEM domain-containing protein 2 OS=Homo sapiens GN=ANKLE2 PE=1 SV=4	0	0.355918	0	0	0	0	0	0	0	0	0	0	0	0	8.7707e-05	0	2.19268e-05	0	0	2	0	0.5
ELP6	Elongator complex protein 6 OS=Homo sapiens GN=ELP6 PE=1 SV=1	0	0.355918	0	0	0	0	0	0	0	0	0	0	0	0.00028395	0	0	7.09875e-05	0	2	0	0	0.5
HSPB11	Intraflagellar transport protein 25 homolog OS=Homo sapiens GN=HSPB11 PE=1 SV=1	0	0.355918	0	0	0	0	0	0	0	0	0	0	0	0.00052452	0	0	0.00013113	0	2	0	0	0.5
DCTN1	Dynactin subunit 1 OS=Homo sapiens GN=DCTN1 PE=1 SV=3	0	0.355918	0	0	0	0	0	0	0	0	0	0	6.3743e-05	0	0	0	1.59358e-05	2	0	0	0	0.5
WDR82	WD repeat-containing protein 82 OS=Homo sapiens GN=WDR82 PE=1 SV=1	0	0.355918	0	0	0	0	0	0	0	0	0	0	0	0	0.00026284	0	6.571e-05	0	0	2	0	0.5
GMEB1	Glucocorticoid modulatory element-binding protein 1 OS=Homo sapiens GN=GMEB1 PE=1 SV=2	0	0.355918	0	0	0	0	0	0	0	0	0	0	0	0	0.00014358	0	3.5895e-05	0	0	2	0	0.5
POLR3F	DNA-directed RNA polymerase III subunit RPC6 OS=Homo sapiens GN=POLR3F PE=1 SV=1	0	0.355918	0	0	0	0	0	0	0	0	0	0	0	0	0	0.0003638	9.095e-05	0	0	0	3	0.75
HSPA4	Heat shock 70 kDa protein 4 OS=Homo sapiens GN=HSPA4 PE=1 SV=4	0	0.355918	0	0	0	0	0	0	0	0	0	0	0	0	0	9.124e-05	2.281e-05	0	0	0	2	0.5
RGPD1	RANBP2-like and GRIP domain-containing protein 1 OS=Homo sapiens GN=RGPD1 PE=2 SV=1	0	0.355918	0	0	0	0	0	0	0	0	0	0	0	0	0	4.3845e-05	1.09612e-05	0	0	0	35	8.75
PHKA1	Phosphorylase b kinase regulatory subunit alpha, skeletal muscle isoform OS=Homo sapiens GN=PHKA1 PE=1 SV=2	0	0.355918	0	0	0	0	0	0	0	0	0	0	0	6.1759e-05	0	0	1.54398e-05	0	2	0	0	0.5
EPB41L5	Band 4.1-like protein 5 OS=Homo sapiens GN=EPB41L5 PE=1 SV=3	0	0.355918	0	0	0	0	0	0	0	0	0	0	0	0	0	0.00010456	2.614e-05	0	0	0	2	0.5
GMEB2	Glucocorticoid modulatory element-binding protein 2 OS=Homo sapiens GN=GMEB2 PE=1 SV=1	0	0.355918	0	0	0	0	0	0	0	0	0	0	0	0	0	0.00014461	3.61525e-05	0	0	0	2	0.5
TTC37	Tetratricopeptide repeat protein 37 OS=Homo sapiens GN=TTC37 PE=1 SV=1	0	0.355918	0	0	0	0	0	0	0	0	0	0	0	0	0	4.9003e-05	1.22507e-05	0	0	0	2	0.5
NRBP1	Nuclear receptor-binding protein OS=Homo sapiens GN=NRBP1 PE=1 SV=1	0	0.355918	0	0	0	0	0	0	0	0	0	0	0	0	0.00023066	0	5.7665e-05	0	0	3	0	0.75
ABCF2	ATP-binding cassette sub-family F member 2 OS=Homo sapiens GN=ABCF2 PE=1 SV=2	0	0.355918	0	0	0	0	0	0	0	0	0	0	0	0	0.00013205	0	3.30125e-05	0	0	2	0	0.5
NAV1	Neuron navigator 1 OS=Homo sapiens GN=NAV1 PE=1 SV=2	0	0.355918	0	0	0	0	0	0	0	0	0	0	0	4.024e-05	0	0	1.006e-05	0	2	0	0	0.5
USP38	Ubiquitin carboxyl-terminal hydrolase 38 OS=Homo sapiens GN=USP38 PE=1 SV=2	0	0.355918	0	0	0	0	0	0	0	0	0	0	0	0.00010873	0	0	2.71825e-05	0	3	0	0	0.75
GSPT1	Eukaryotic peptide chain release factor GTP-binding subunit ERF3A OS=Homo sapiens GN=GSPT1 PE=1 SV=1	0	0.355918	0	0	0	0	0	0	0	0	0	0	0	0	0.00016487	0	4.12175e-05	0	0	2	0	0.5
PWP2	Periodic tryptophan protein 2 homolog OS=Homo sapiens GN=PWP2 PE=2 SV=2	0	0.355918	0	0	0	0	0	0	0	0	0	0	0	0	8.952e-05	0	2.238e-05	0	0	2	0	0.5
ZCCHC3	Zinc finger CCHC domain-containing protein 3 OS=Homo sapiens GN=ZCCHC3 PE=1 SV=1	0	0.355918	0	0	0	0	0	0	0	0	0	0	0	0	0.00020364	0	5.091e-05	0	0	2	0	0.5
ATP6V1G1	V-type proton ATPase subunit G 1 OS=Homo sapiens GN=ATP6V1G1 PE=1 SV=3	0	0.355918	0	0	0	0	0	0	0	0	0	0	0	0	0.00069719	0	0.000174297	0	0	2	0	0.5
MRPS14	28S ribosomal protein S14, mitochondrial OS=Homo sapiens GN=MRPS14 PE=1 SV=1	0	0.355918	0	0	0	0	0	0	0	0	0	0	0.00063644	0	0	0	0.00015911	2	0	0	0	0.5
KIAA1143	Uncharacterized protein KIAA1143 OS=Homo sapiens GN=KIAA1143 PE=1 SV=2	0	0.355918	0	0	0	0	0	0	0	0	0	0	0.00052899	0	0	0	0.000132248	2	0	0	0	0.5
XAB2	Pre-mRNA-splicing factor SYF1 OS=Homo sapiens GN=XAB2 PE=1 SV=2	0	0.355918	0	0	0	0	0	0	0	0	0	0	0	8.834e-05	0	0	2.2085e-05	0	2	0	0	0.5
RRP15	RRP15-like protein OS=Homo sapiens GN=RRP15 PE=1 SV=2	0	0.355918	0	0	0	0	0	0	0	0	0	0	0	0	0.00029173	0	7.29325e-05	0	0	2	0	0.5
ZNF552	Zinc finger protein 552 OS=Homo sapiens GN=ZNF552 PE=1 SV=2	0	0.355918	0	0	0	0	0	0	0	0	0	0	0	0	0	0.00018831	4.70775e-05	0	0	0	2	0.5
MRGBP	MRG/MORF4L-binding protein OS=Homo sapiens GN=MRGBP PE=1 SV=1	0	0.355918	0	0	0	0	0	0	0	0	0	0	0	0.00037025	0	0	9.25625e-05	0	2	0	0	0.5
KCNQ5	Potassium voltage-gated channel subfamily KQT member 5 OS=Homo sapiens GN=KCNQ5 PE=1 SV=3	0	0.355918	0	0	0	0	0	0	0	0	0	0	0	0	0	0.00012335	3.08375e-05	0	0	0	3	0.75
TAF5L	TAF5-like RNA polymerase II p300/CBP-associated factor-associated factor 65 kDa subunit 5L OS=Homo sapiens GN=TAF5L PE=1 SV=1	0	0.355918	0	0	0	0	0	0	0	0	0	0	0	0	0	0.00013012	3.253e-05	0	0	0	2	0.5
MED1	Mediator of RNA polymerase II transcription subunit 1 OS=Homo sapiens GN=MED1 PE=1 SV=4	0	0.355918	0	0	0	0	0	0	0	0	0	0	0	0	0	4.8477e-05	1.21192e-05	0	0	0	2	0.5
RBM20	RNA-binding protein 20 OS=Homo sapiens GN=RBM20 PE=1 SV=3	0	0.355918	0	0	0	0	0	0	0	0	0	0	0	0	0	6.2462e-05	1.56155e-05	0	0	0	2	0.5
CRNKL1	Crooked neck-like protein 1 OS=Homo sapiens GN=CRNKL1 PE=1 SV=4	0	0.355918	0	0	0	0	0	0	0	0	0	0	0	0	0	9.0379e-05	2.25947e-05	0	0	0	2	0.5
MRPL41	39S ribosomal protein L41, mitochondrial OS=Homo sapiens GN=MRPL41 PE=1 SV=1	0	0.355918	0	0	0	0	0	0	0	0	0	0	0.00059463	0	0	0	0.000148657	2	0	0	0	0.5
EMC1	ER membrane protein complex subunit 1 OS=Homo sapiens GN=EMC1 PE=1 SV=1	0	0.355918	0	0	0	0	0	0	0	0	0	0	0	0	8.2849e-05	0	2.07123e-05	0	0	2	0	0.5
PIGK	GPI-anchor transamidase OS=Homo sapiens GN=PIGK PE=1 SV=2	0	0.355918	0	0	0	0	0	0	0	0	0	0	0.00020624	0	0	0	5.156e-05	2	0	0	0	0.5
ZBTB11	Zinc finger and BTB domain-containing protein 11 OS=Homo sapiens GN=ZBTB11 PE=1 SV=2	0	0.355918	0	0	0	0	0	0	0	0	0	0	0	7.1729e-05	0	0	1.79323e-05	0	2	0	0	0.5
FAM91A1	Protein FAM91A1 OS=Homo sapiens GN=FAM91A1 PE=1 SV=3	0	0.355918	0	0	0	0	0	0	0	0	0	0	0	9.0132e-05	0	0	2.2533e-05	0	2	0	0	0.5
PRPF31	U4/U6 small nuclear ribonucleoprotein Prp31 OS=Homo sapiens GN=PRPF31 PE=1 SV=2	0	0.355918	0	0	0	0	0	0	0	0	0	0	0.00016325	0	0	0	4.08125e-05	2	0	0	0	0.5
KIAA1841	Uncharacterized protein KIAA1841 OS=Homo sapiens GN=KIAA1841 PE=2 SV=2	0	0.355918	0	0	0	0	0	0	0	0	0	0	0	0.00015779	0	0	3.94475e-05	0	3	0	0	0.75
ASPH	Aspartyl/asparaginyl beta-hydroxylase OS=Homo sapiens GN=ASPH PE=1 SV=3	0	0.355918	0	0	0	0	0	0	0	0	0	0	0.00010747	0	0	0	2.68675e-05	2	0	0	0	0.5
RPS6KC1	Ribosomal protein S6 kinase delta-1 OS=Homo sapiens GN=RPS6KC1 PE=1 SV=2	0	0.355918	0	0	0	0	0	0	0	0	0	0	0	7.0854e-05	0	0	1.77135e-05	0	2	0	0	0.5
C21orf2	Protein C21orf2 OS=Homo sapiens GN=C21orf2 PE=1 SV=1	0	0.355918	0	0	0	0	0	0	0	0	0	0	0	0.00029504	0	0	7.376e-05	0	2	0	0	0.5
ZNF106	Zinc finger protein 106 OS=Homo sapiens GN=ZNF106 PE=1 SV=1	0	0.355918	0	0	0	0	0	0	0	0	0	0	0	4.0112e-05	0	0	1.0028e-05	0	2	0	0	0.5
UFD1	Ubiquitin recognition factor in ER-associated degradation protein 1 OS=Homo sapiens GN=UFD1 PE=1 SV=3	0	0.355918	0	0	0	0	0	0	0	0	0	0	0	0.00024603	0	0	6.15075e-05	0	2	0	0	0.5
USP22	Ubiquitin carboxyl-terminal hydrolase 22 OS=Homo sapiens GN=USP22 PE=1 SV=2	0	0.355918	0	0	0	0	0	0	0	0	0	0	0	0.00014387	0	0	3.59675e-05	0	2	0	0	0.5
WDR13	WD repeat-containing protein 13 OS=Homo sapiens GN=WDR13 PE=1 SV=2	0	0.355918	0	0	0	0	0	0	0	0	0	0	0	0	0	0.00015802	3.9505e-05	0	0	0	2	0.5
DNAJC13	DnaJ homolog subfamily C member 13 OS=Homo sapiens GN=DNAJC13 PE=1 SV=5	0	0.355918	0	0	0	0	0	0	0	0	0	0	3.6319e-05	0	0	0	9.07975e-06	2	0	0	0	0.5

## Sheet: FHIP1B-C
				FHIP1B-BioID										BioID control
				Normalized Spectral Abundance Factor (NSAF)					Spectral Counts					Normalized Spectral Abundance Factor (NSAF)					Spectral Counts
NCBI_Gene	Description	enrichment ratio	p-value	NSAF 1	NSAF 2	NSAF 3	NSAF 4	avg NSAF	SC 1	SC 2	SC 3	SC 4	avg SCs	NSAF 1	NSAF 2	NSAF 3	NSAF 4	avg NSAF	SC 1	SC 2	SC 3	SC 4	avg SCs
FAM160A2	FTS and Hook-interacting protein OS=Homo sapiens GN=FAM160A2 PE=1 SV=3	∞	1.43607e-09	0.0099552	0.0096218	0.009189	0.0094778	0.00956095	291	331	284	284	297.5	0	0	0	0	0	0	0	0	0	0
DLST	Dihydrolipoyllysine-residue succinyltransferase component of 2-oxoglutarate dehydrogenase complex, mitochondrial OS=Homo sapiens GN=DLST PE=1 SV=4	∞	1.56464e-08	0.00029362	0.00031187	0.0002777	0.00028643	0.000292405	4	5	4	4	4.25	0	0	0	0	0	0	0	0	0	0
LNPEP	Leucyl-cystinyl aminopeptidase OS=Homo sapiens GN=LNPEP PE=1 SV=3	∞	8.90918e-06	0.00058394	0.00060645	0.00079775	0.00066459	0.000663182	18	22	26	21	21.75	0	0	0	0	0	0	0	0	0	0
EXO1	Exonuclease 1 OS=Homo sapiens GN=EXO1 PE=1 SV=2	∞	3.31418e-05	0.0015722	0.0010687	0.0013011	0.0011119	0.00126347	40	32	35	29	34	0	0	0	0	0	0	0	0	0	0
DBT	Lipoamide acyltransferase component of branched-chain alpha-keto acid dehydrogenase complex, mitochondrial OS=Homo sapiens GN=DBT PE=1 SV=3	∞	3.37758e-05	0.0013108	0.0013483	0.00097873	0.0015479	0.00129643	19	23	15	23	20	0	0	0	0	0	0	0	0	0	0
CASZ1	Zinc finger protein castor homolog 1 OS=Homo sapiens GN=CASZ1 PE=1 SV=4	∞	5.09661e-05	5.6712e-05	4.8189e-05	3.5759e-05	5.5324e-05	4.8996e-05	3	3	2	3	2.75	0	0	0	0	0	0	0	0	0	0
TIMM44	Mitochondrial import inner membrane translocase subunit TIM44 OS=Homo sapiens GN=TIMM44 PE=1 SV=2	∞	6.67123e-05	0.0002207	0.00031256	0.00020874	0.0002153	0.000239325	3	5	3	3	3.5	0	0	0	0	0	0	0	0	0	0
BCL11A	B-cell lymphoma/leukemia 11A OS=Homo sapiens GN=BCL11A PE=1 SV=2	∞	7.33861e-05	7.9646e-05	0.00013535	0.00011299	0.00011654	0.000111131	2	4	3	3	3	0	0	0	0	0	0	0	0	0	0
SCIN	Adseverin OS=Homo sapiens GN=SCIN PE=1 SV=4	∞	7.98116e-05	0.0011627	0.0013041	0.0015835	0.00095273	0.00125076	25	33	36	21	28.75	0	0	0	0	0	0	0	0	0	0
ARID3B	AT-rich interactive domain-containing protein 3B OS=Homo sapiens GN=ARID3B PE=1 SV=2	∞	9.37612e-05	0.00041491	0.00025183	0.00033636	0.00028911	0.000323053	7	5	6	5	5.75	0	0	0	0	0	0	0	0	0	0
SNX3	Sorting nexin-3 OS=Homo sapiens GN=SNX3 PE=1 SV=3	∞	0.000125479	0.0022579	0.0015697	0.0013589	0.0016019	0.0016971	11	9	7	8	8.75	0	0	0	0	0	0	0	0	0	0
STEAP3	Metalloreductase STEAP3 OS=Homo sapiens GN=STEAP3 PE=1 SV=2	∞	0.000143868	0.00020442	0.0001158	0.00019334	0.00019941	0.000178242	3	2	3	3	2.75	0	0	0	0	0	0	0	0	0	0
FLG2	Filaggrin-2 OS=Homo sapiens GN=FLG2 PE=1 SV=1	∞	0.000143908	4.1722e-05	2.3634e-05	3.946e-05	4.07e-05	3.6379e-05	3	2	3	3	2.75	0	0	0	0	0	0	0	0	0	0
MRPS9	28S ribosomal protein S9, mitochondrial OS=Homo sapiens GN=MRPS9 PE=1 SV=2	∞	0.000178867	0.00033588	0.00042811	0.00023826	0.00040957	0.000352955	4	6	3	5	4.5	0	0	0	0	0	0	0	0	0	0
ZNF267	Zinc finger protein 267 OS=Homo sapiens GN=ZNF267 PE=1 SV=3	∞	0.000207941	0.00044754	0.00030423	0.00042328	0.00026195	0.00035925	10	8	12	6	9	0	0	0	0	0	0	0	0	0	0
PUS1	tRNA pseudouridine synthase A OS=Homo sapiens GN=PUS1 PE=1 SV=3	∞	0.000240413	0.00015575	0.00013234	0.00022096	0.0002279	0.000184237	2	2	3	3	2.5	0	0	0	0	0	0	0	0	0	0
RAB5B	Ras-related protein Rab-5B OS=Homo sapiens GN=RAB5B PE=1 SV=1	∞	0.000240413	0.00030932	0.00026284	0.00043883	0.00045263	0.000365905	4	3	5	5	4.25	0	0	0	0	0	0	0	0	0	0
LMTK2	Serine/threonine-protein kinase LMTK2 OS=Homo sapiens GN=LMTK2 PE=1 SV=2	∞	0.000252702	0.00011062	0.00018799	0.00018832	0.00012949	0.000154105	5	10	9	6	7.5	0	0	0	0	0	0	0	0	0	0
DLAT	Dihydrolipoyllysine-residue acetyltransferase component of pyruvate dehydrogenase complex, mitochondrial OS=Homo sapiens GN=DLAT PE=1 SV=3	∞	0.00029399	0.00010279	0.00017468	0.00019443	0.00020055	0.000168113	2	4	4	4	3.5	0	0	0	0	0	0	0	0	0	0
FANCM	Fanconi anemia group M protein OS=Homo sapiens GN=FANCM PE=1 SV=2	∞	0.000294695	8.1182e-05	5.5186e-05	4.6069e-05	7.9195e-05	6.5408e-05	5	4	3	5	4.25	0	0	0	0	0	0	0	0	0	0
PYCR1	Pyrroline-5-carboxylate reductase 1, mitochondrial OS=Homo sapiens GN=PYCR1 PE=1 SV=2	∞	0.000318124	0.00031272	0.00017715	0.00029577	0.00020337	0.000247253	4	5	4	3	4	0	0	0	0	0	0	0	0	0	0
EPN2	Epsin-2 OS=Homo sapiens GN=EPN2 PE=1 SV=3	∞	0.00031814	0.00015563	8.8159e-05	0.00014719	0.00010121	0.000123047	3	2	3	2	2.5	0	0	0	0	0	0	0	0	0	0
MRPS31	28S ribosomal protein S31, mitochondrial OS=Homo sapiens GN=MRPS31 PE=1 SV=3	∞	0.000363724	0.00033673	0.00035766	0.00055734	0.00057485	0.000456645	4	5	7	7	5.75	0	0	0	0	0	0	0	0	0	0
SLC6A15	Sodium-dependent neutral amino acid transporter B(0)AT2 OS=Homo sapiens GN=SLC6A15 PE=1 SV=1	∞	0.000422088	0.00013665	7.7411e-05	8.6164e-05	0.00013331	0.000108384	3	2	2	3	2.5	0	0	0	0	0	0	0	0	0	0
APPL1	DCC-interacting protein 13-alpha OS=Homo sapiens GN=APPL1 PE=1 SV=1	∞	0.000446793	0.0001407	0.00023911	0.00022179	0.00013726	0.000184715	3	6	5	3	4.25	0	0	0	0	0	0	0	0	0	0
ECE1	Endothelin-converting enzyme 1 OS=Homo sapiens GN=ECE1 PE=1 SV=2	∞	0.000469233	0.00030229	0.00029356	0.00024506	0.0004634	0.000326077	7	8	6	11	8	0	0	0	0	0	0	0	0	0	0
AP4B1	AP-4 complex subunit beta-1 OS=Homo sapiens GN=AP4B1 PE=1 SV=2	∞	0.000653504	0.00013499	0.00019117	0.00017023	8.7789e-05	0.000146045	3	5	4	2	3.5	0	0	0	0	0	0	0	0	0	0
CHD3	Chromodomain-helicase-DNA-binding protein 3 OS=Homo sapiens GN=CHD3 PE=1 SV=3	∞	0.000729846	9.9757e-05	5.651e-05	9.4349e-05	0.00012975	9.50915e-05	18	15	17	24	18.5	0	0	0	0	0	0	0	0	0	0
NDUFS1	NADH-ubiquinone oxidoreductase 75 kDa subunit, mitochondrial OS=Homo sapiens GN=NDUFS1 PE=1 SV=3	∞	0.000876845	0.00013722	7.773e-05	0.00017304	0.00017848	0.000141618	3	2	4	4	3.25	0	0	0	0	0	0	0	0	0	0
AP4M1	AP-4 complex subunit mu-1 OS=Homo sapiens GN=AP4M1 PE=1 SV=2	∞	0.00119114	0.00044043	0.00024949	0.00041655	0.00021482	0.000330323	6	4	6	3	4.75	0	0	0	0	0	0	0	0	0	0
PTCD3	Pentatricopeptide repeat domain-containing protein 3, mitochondrial OS=Homo sapiens GN=PTCD3 PE=1 SV=3	∞	0.0012705	0.00033783	0.00020504	0.00027387	0.0004708	0.000321885	7	5	6	10	7	0	0	0	0	0	0	0	0	0	0
ESRRB	Steroid hormone receptor ERR2 OS=Homo sapiens GN=ESRRB PE=1 SV=3	∞	0.00183349	0.00061436	0.00039152	0.00029053	0.00029966	0.000399017	8	6	4	4	5.5	0	0	0	0	0	0	0	0	0	0
AP4E1	AP-4 complex subunit epsilon-1 OS=Homo sapiens GN=AP4E1 PE=1 SV=2	∞	0.00280058	0.00026321	9.9402e-05	0.0002766	0.00017118	0.000202598	9	4	10	6	7.25	0	0	0	0	0	0	0	0	0	0
NME4	Nucleoside diphosphate kinase, mitochondrial OS=Homo sapiens GN=NME4 PE=1 SV=1	∞	0.00413042	0.0008891	0.00045329	0.00033636	0.00086733	0.00063652	5	3	2	5	3.75	0	0	0	0	0	0	0	0	0	0
TRIM24	Transcription intermediary factor 1-alpha OS=Homo sapiens GN=TRIM24 PE=1 SV=3	∞	0.00631575	0.0004117	0.00013455	0.00020967	0.00021625	0.000243042	15	7	7	8	9.25	0	0	0	0	0	0	0	0	0	0
MYO5B	Unconventional myosin-Vb OS=Homo sapiens GN=MYO5B PE=1 SV=3	∞	0.00884631	3.5987e-05	0.00016818	0.00010211	0.00010532	0.000102899	5	13	11	11	10	0	0	0	0	0	0	0	0	0	0
UBN1	Ubinuclein-1 OS=Homo sapiens GN=UBN1 PE=1 SV=2	∞	0.0194319	0.00017594	7.4749e-05	5.5467e-05	5.721e-05	9.08415e-05	6	3	2	2	3.25	0	0	0	0	0	0	0	0	0	0
PHF21A	PHD finger protein 21A OS=Homo sapiens GN=PHF21A PE=1 SV=1	∞	0.0241046	9.7801e-05	0	9.2499e-05	9.5406e-05	9.52353e-05	2	0	2	2	2	0	0	0	0	0	0	0	0	0	0
CLPX	ATP-dependent Clp protease ATP-binding subunit clpX-like, mitochondrial OS=Homo sapiens GN=CLPX PE=1 SV=2	∞	0.0246389	0	0.00013391	0.00014905	0.00015374	0.000145567	0	3	3	3	3	0	0	0	0	0	0	0	0	0	0
BEND3	BEN domain-containing protein 3 OS=Homo sapiens GN=BEND3 PE=1 SV=1	∞	0.0248393	8.032e-05	6.8249e-05	7.5966e-05	0	7.4845e-05	2	2	2	0	2	0	0	0	0	0	0	0	0	0	0
TNKS2	Tankyrase-2 OS=Homo sapiens GN=TNKS2 PE=1 SV=1	∞	0.0249221	5.7037e-05	4.8465e-05	0	5.564e-05	5.3714e-05	2	3	0	2	2.33333	0	0	0	0	0	0	0	0	0	0
ATP9A	Probable phospholipid-transporting ATPase IIA OS=Homo sapiens GN=ATP9A PE=1 SV=3	∞	0.0263894	9.5279e-05	0	0.00012015	0.00012393	0.00011312	3	0	4	4	3.66667	0	0	0	0	0	0	0	0	0	0
MRPS35	28S ribosomal protein S35, mitochondrial OS=Homo sapiens GN=MRPS35 PE=1 SV=1	∞	0.0267195	0.00030885	0	0.00038947	0.00030128	0.0003332	3	0	4	3	3.33333	0	0	0	0	0	0	0	0	0	0
ECHS1	Enoyl-CoA hydratase, mitochondrial OS=Homo sapiens GN=ECHS1 PE=1 SV=4	∞	0.0277916	0.00022933	0.00029229	0.00032534	0	0.00028232	2	3	3	0	2.66667	0	0	0	0	0	0	0	0	0	0
GPS2	G protein pathway suppressor 2 OS=Homo sapiens GN=GPS2 PE=1 SV=3	∞	0.0291529	0.00030507	0.00025922	0.00038471	0	0.000316333	3	3	4	0	3.33333	0	0	0	0	0	0	0	0	0	0
ZFPM2	Zinc finger protein ZFPM2 OS=Homo sapiens GN=ZFPM2 PE=1 SV=3	∞	0.0305011	8.667e-05	7.3645e-05	5.4648e-05	0	7.16543e-05	3	3	2	0	2.66667	0	0	0	0	0	0	0	0	0	0
YEATS4	YEATS domain-containing protein 4 OS=Homo sapiens GN=YEATS4 PE=1 SV=1	∞	0.0313091	0.00043946	0	0.00027709	0.0004287	0.00038175	3	0	2	3	2.66667	0	0	0	0	0	0	0	0	0	0
ERC1	ELKS/Rab6-interacting/CAST family member 1 OS=Homo sapiens GN=ERC1 PE=1 SV=1	∞	0.0321234	5.9592e-05	0	5.6362e-05	8.7199e-05	6.77177e-05	2	0	2	3	2.33333	0	0	0	0	0	0	0	0	0	0
KIAA1551	Uncharacterized protein KIAA1551 OS=Homo sapiens GN=KIAA1551 PE=1 SV=3	∞	0.0332883	9.517e-05	0	7.2009e-05	5.5704e-05	7.42943e-05	5	0	4	3	4	0	0	0	0	0	0	0	0	0	0
SLC12A6	Solute carrier family 12 member 6 OS=Homo sapiens GN=SLC12A6 PE=1 SV=2	∞	0.0337603	8.6745e-05	0	5.4695e-05	5.6414e-05	6.59513e-05	3	0	2	2	2.33333	0	0	0	0	0	0	0	0	0	0
RAD54L2	Helicase ARIP4 OS=Homo sapiens GN=RAD54L2 PE=1 SV=4	∞	0.0337605	6.8001e-05	0	4.2876e-05	4.4224e-05	5.17003e-05	3	0	2	2	2.33333	0	0	0	0	0	0	0	0	0	0
DECR1	2,4-dienoyl-CoA reductase, mitochondrial OS=Homo sapiens GN=DECR1 PE=1 SV=1	∞	0.0339835	0.0004963	0	0.00028164	0.00038732	0.00038842	5	0	3	4	4	0	0	0	0	0	0	0	0	0	0
PRDM16	PR domain zinc finger protein 16 OS=Homo sapiens GN=PRDM16 PE=1 SV=3	∞	0.037994	7.8179e-05	0	0.00014788	0.00010169	0.00010925	3	0	6	4	4.33333	0	0	0	0	0	0	0	0	0	0
NDUFS3	NADH dehydrogenase [ubiquinone] iron-sulfur protein 3, mitochondrial OS=Homo sapiens GN=NDUFS3 PE=1 SV=1	∞	0.0401653	0.00025191	0.00032108	0	0.00049149	0.000354827	2	3	0	4	3	0	0	0	0	0	0	0	0	0	0
TSHZ1	Teashirt homolog 1 OS=Homo sapiens GN=TSHZ1 PE=1 SV=2	∞	0.041286	0.0001235	0	5.8403e-05	9.0357e-05	9.07533e-05	8	0	4	6	6	0	0	0	0	0	0	0	0	0	0
NDUFS8	NADH dehydrogenase [ubiquinone] iron-sulfur protein 8, mitochondrial OS=Homo sapiens GN=NDUFS8 PE=1 SV=1	∞	0.0532884	0.00063338	0	0.00029952	0.00030893	0.000413943	4	0	2	2	2.66667	0	0	0	0	0	0	0	0	0	0
SENP1	Sentrin-specific protease 1 OS=Homo sapiens GN=SENP1 PE=1 SV=2	∞	0.0532886	0.00020654	0	9.767e-05	0.00010074	0.000134983	4	0	2	2	2.66667	0	0	0	0	0	0	0	0	0	0
DAP3	28S ribosomal protein S29, mitochondrial OS=Homo sapiens GN=DAP3 PE=1 SV=1	∞	0.0812151	0	0.00014198	0.00031608	0.00057052	0.00034286	0	2	4	7	4.33333	0	0	0	0	0	0	0	0	0	0
PIAS3	E3 SUMO-protein ligase PIAS3 OS=Homo sapiens GN=PIAS3 PE=1 SV=2	∞	0.134024	0.0001059	0	0	0.00010331	0.000104605	4	0	0	4	4	0	0	0	0	0	0	0	0	0	0
RAB11A	Ras-related protein Rab-11A OS=Homo sapiens GN=RAB11A PE=1 SV=3	∞	0.134024	0.00030789	0	0	0.00030035	0.00030412	2	0	0	2	2	0	0	0	0	0	0	0	0	0	0
HSDL1	Inactive hydroxysteroid dehydrogenase-like protein 1 OS=Homo sapiens GN=HSDL1 PE=1 SV=3	∞	0.134051	0	0	0.0001906	0.00019659	0.000193595	0	0	2	2	2	0	0	0	0	0	0	0	0	0	0
RAB2A	Ras-related protein Rab-2A OS=Homo sapiens GN=RAB2A PE=1 SV=1	∞	0.134051	0	0	0.00044504	0.00045903	0.000452035	0	0	3	3	3	0	0	0	0	0	0	0	0	0	0
LRP2	Low-density lipoprotein receptor-related protein 2 OS=Homo sapiens GN=LRP2 PE=1 SV=3	∞	0.134051	0	0	1.3512e-05	1.3937e-05	1.37245e-05	0	0	2	2	2	0	0	0	0	0	0	0	0	0	0
BCL11B	B-cell lymphoma/leukemia 11B OS=Homo sapiens GN=BCL11B PE=1 SV=1	∞	0.134223	0.00011158	0	0.00010554	0	0.00010856	4	0	4	0	4	0	0	0	0	0	0	0	0	0	0
FAM53C	Protein FAM53C OS=Homo sapiens GN=FAM53C PE=1 SV=1	∞	0.134223	0.00016965	0	0.00016046	0	0.000165055	2	0	2	0	2	0	0	0	0	0	0	0	0	0	0
NAA40	N-alpha-acetyltransferase 40 OS=Homo sapiens GN=NAA40 PE=1 SV=1	∞	0.134223	0.00028061	0	0.0002654	0	0.000273005	2	0	2	0	2	0	0	0	0	0	0	0	0	0	0
DOT1L	Histone-lysine N-methyltransferase, H3 lysine-79 specific OS=Homo sapiens GN=DOT1L PE=1 SV=2	∞	0.134224	5.7365e-05	0	5.4255e-05	0	5.581e-05	3	0	3	0	3	0	0	0	0	0	0	0	0	0	0
EP300	Histone acetyltransferase p300 OS=Homo sapiens GN=EP300 PE=1 SV=2	∞	0.134224	2.755e-05	0	2.6056e-05	0	2.6803e-05	2	0	2	0	2	0	0	0	0	0	0	0	0	0	0
CACNA2D1	Voltage-dependent calcium channel subunit alpha-2/delta-1 OS=Homo sapiens GN=CACNA2D1 PE=1 SV=3	∞	0.134892	0	5.1233e-05	5.7026e-05	0	5.41295e-05	0	2	2	0	2	0	0	0	0	0	0	0	0	0	0
SLC38A2	Sodium-coupled neutral amino acid transporter 2 OS=Homo sapiens GN=SLC38A2 PE=1 SV=2	∞	0.135495	0	0.00011168	0	0.00012821	0.000119945	0	2	0	2	2	0	0	0	0	0	0	0	0	0	0
HSPE1	10 kDa heat shock protein, mitochondrial OS=Homo sapiens GN=HSPE1 PE=1 SV=2	∞	0.135496	0	0.00055402	0	0.00063604	0.00059503	0	2	0	2	2	0	0	0	0	0	0	0	0	0	0
SMARCA2	Probable global transcription activator SNF2L2 OS=Homo sapiens GN=SMARCA2 PE=1 SV=2	∞	0.135496	0	3.5541e-05	0	4.0803e-05	3.8172e-05	0	12	0	18	15	0	0	0	0	0	0	0	0	0	0
PDK1	[Pyruvate dehydrogenase (acetyl-transferring)] kinase isozyme 1, mitochondrial OS=Homo sapiens GN=PDK1 PE=1 SV=1	∞	0.135496	0	0.00012961	0	0.0001488	0.000139205	0	2	0	2	2	0	0	0	0	0	0	0	0	0	0
IRF2BPL	Interferon regulatory factor 2-binding protein-like OS=Homo sapiens GN=IRF2BPL PE=1 SV=1	∞	0.136086	0.00012532	0.00010649	0	0	0.000115905	9	6	0	0	7.5	0	0	0	0	0	0	0	0	0	0
NDUFA5	NADH dehydrogenase [ubiquinone] 1 alpha subcomplex subunit 5 OS=Homo sapiens GN=NDUFA5 PE=1 SV=3	∞	0.136568	0	0.00097431	0.00081336	0	0.000893835	0	4	3	0	3.5	0	0	0	0	0	0	0	0	0	0
PPP4R2	Serine/threonine-protein phosphatase 4 regulatory subunit 2 OS=Homo sapiens GN=PPP4R2 PE=1 SV=3	∞	0.138231	0.00023923	0	0.00030168	0	0.000270455	3	0	4	0	3.5	0	0	0	0	0	0	0	0	0	0
GPC6	Glypican-6 OS=Homo sapiens GN=GPC6 PE=1 SV=1	∞	0.138625	0.00011983	0.00015273	0	0	0.00013628	3	5	0	0	4	0	0	0	0	0	0	0	0	0	0
MRPS22	28S ribosomal protein S22, mitochondrial OS=Homo sapiens GN=MRPS22 PE=1 SV=1	∞	0.139422	0.0002771	0	0	0.00036042	0.00031876	3	0	0	4	3.5	0	0	0	0	0	0	0	0	0	0
LSR	Lipolysis-stimulated lipoprotein receptor OS=Homo sapiens GN=LSR PE=1 SV=4	∞	0.139607	0	0.00013061	0	9.9964e-05	0.000115287	0	3	0	2	2.5	0	0	0	0	0	0	0	0	0	0
SUCLA2	Succinate--CoA ligase [ADP-forming] subunit beta, mitochondrial OS=Homo sapiens GN=SUCLA2 PE=1 SV=3	∞	0.141911	0	0	0.00020378	0.00028024	0.00024201	0	0	3	4	3.5	0	0	0	0	0	0	0	0	0	0
TSFM	Elongation factor Ts, mitochondrial OS=Homo sapiens GN=TSFM PE=1 SV=2	∞	0.144837	0	0	0.00029031	0.00019962	0.000244965	0	0	3	2	2.5	0	0	0	0	0	0	0	0	0	0
MRPS17	28S ribosomal protein S17, mitochondrial OS=Homo sapiens GN=MRPS17 PE=1 SV=1	∞	0.145184	0.00051157	0	0	0.00074857	0.00063007	2	0	0	3	2.5	0	0	0	0	0	0	0	0	0	0
KDM1B	Lysine-specific histone demethylase 1B OS=Homo sapiens GN=KDM1B PE=1 SV=3	∞	0.148152	0.00012136	0	0	7.8925e-05	0.000100142	3	0	0	2	2.5	0	0	0	0	0	0	0	0	0	0
RPL36A	60S ribosomal protein L36a OS=Homo sapiens GN=RPL36A PE=1 SV=2	∞	0.148541	0	0	0.00059339	0.00091806	0.000755725	0	0	2	3	2.5	0	0	0	0	0	0	0	0	0	0
ELMSAN1	ELM2 and SANT domain-containing protein 1 OS=Homo sapiens GN=ELMSAN1 PE=1 SV=2	∞	0.153716	0	5.4077e-05	9.0286e-05	0	7.21815e-05	0	2	3	0	2.5	0	0	0	0	0	0	0	0	0	0
FOXP4	Forkhead box protein P4 OS=Homo sapiens GN=FOXP4 PE=1 SV=1	∞	0.157889	0.0001467	8.3103e-05	0	0	0.000114901	3	2	0	0	2.5	0	0	0	0	0	0	0	0	0	0
ZNF703	Zinc finger protein 703 OS=Homo sapiens GN=ZNF703 PE=1 SV=1	∞	0.157889	0.00016908	9.578e-05	0	0	0.00013243	3	2	0	0	2.5	0	0	0	0	0	0	0	0	0	0
RBM5	RNA-binding protein 5 OS=Homo sapiens GN=RBM5 PE=1 SV=2	∞	0.161844	0	0.00010401	0.00019294	0	0.000148475	0	3	5	0	4	0	0	0	0	0	0	0	0	0	0
CPVL	Probable serine carboxypeptidase CPVL OS=Homo sapiens GN=CPVL PE=1 SV=2	∞	0.161846	0	0.00017808	0.00033035	0	0.000254215	0	3	5	0	4	0	0	0	0	0	0	0	0	0	0
CENPF	Centromere protein F OS=Homo sapiens GN=CENPF PE=1 SV=2	∞	0.163459	2.0718e-05	0	3.919e-05	0	2.9954e-05	2	0	4	0	3	0	0	0	0	0	0	0	0	0	0
STX12	Syntaxin-12 OS=Homo sapiens GN=STX12 PE=1 SV=1	∞	0.170418	0.00048192	0	0	0.00023506	0.00035849	4	0	0	2	3	0	0	0	0	0	0	0	0	0	0
DDX39B	Spliceosome RNA helicase DDX39B OS=Homo sapiens GN=DDX39B PE=1 SV=1	∞	0.170968	0	0	0.00014696	0.00030316	0.00022506	0	0	14	13	13.5	0	0	0	0	0	0	0	0	0	0
KRT77	Keratin, type II cytoskeletal 1b OS=Homo sapiens GN=KRT77 PE=1 SV=3	∞	0.17097	0	0	0.00016323	0.00033673	0.00024998	0	0	8	12	10	0	0	0	0	0	0	0	0	0	0
RBM20	RNA-binding protein 20 OS=Homo sapiens GN=RBM20 PE=1 SV=3	∞	0.194512	0.0001355	0	5.1263e-05	0	9.33815e-05	5	0	2	0	3.5	0	0	0	0	0	0	0	0	0	0
BOP1	Ribosome biogenesis protein BOP1 OS=Homo sapiens GN=BOP1 PE=1 SV=2	∞	0.208621	0	0.00026513	0	8.6966e-05	0.000176048	0	7	0	2	4.5	0	0	0	0	0	0	0	0	0	0
AGRN	Agrin OS=Homo sapiens GN=AGRN PE=1 SV=5	∞	0.225092	0	0	3.043e-05	0.00010985	7.014e-05	0	0	2	7	4.5	0	0	0	0	0	0	0	0	0	0
HMGN1	Non-histone chromosomal protein HMG-14 OS=Homo sapiens GN=HMGN1 PE=1 SV=3	∞	0.242472	0	0.0028255	0	0.00064876	0.00173713	0	10	0	2	6	0	0	0	0	0	0	0	0	0	0
KPRP	Keratinocyte proline-rich protein OS=Homo sapiens GN=KPRP PE=1 SV=1	∞	0.355918	0	0	0	0.00016807	0.00016807	0	0	0	3	3	0	0	0	0	0	0	0	0	0	0
MED19	Mediator of RNA polymerase II transcription subunit 19 OS=Homo sapiens GN=MED19 PE=1 SV=2	∞	0.355918	0	0	0.00025778	0	0.00025778	0	0	2	0	2	0	0	0	0	0	0	0	0	0	0
H3F3A	Histone H3.3 OS=Homo sapiens GN=H3F3A PE=1 SV=2	∞	0.355918	0	0.0043629	0	0	0.0043629	0	23	0	0	23	0	0	0	0	0	0	0	0	0	0
MYH14	Myosin-14 OS=Homo sapiens GN=MYH14 PE=1 SV=2	∞	0.355918	0	5.6652e-05	0	0	5.6652e-05	0	61	0	0	61	0	0	0	0	0	0	0	0	0	0
DCD	Dermcidin OS=Homo sapiens GN=DCD PE=1 SV=2	∞	0.355918	0	0	0	0.00088468	0.00088468	0	0	0	3	3	0	0	0	0	0	0	0	0	0	0
LRPPRC	Leucine-rich PPR motif-containing protein, mitochondrial OS=Homo sapiens GN=LRPPRC PE=1 SV=3	∞	0.355918	0	6.0807e-05	0	0	6.0807e-05	0	3	0	0	3	0	0	0	0	0	0	0	0	0	0
ZSCAN20	Zinc finger and SCAN domain-containing protein 20 OS=Homo sapiens GN=ZSCAN20 PE=1 SV=3	∞	0.355918	0	0	6.0306e-05	0	6.0306e-05	0	0	4	0	4	0	0	0	0	0	0	0	0	0	0
KRT4	Keratin, type II cytoskeletal 4 OS=Homo sapiens GN=KRT4 PE=1 SV=4	∞	0.355918	0.00099632	0	0	0	0.00099632	28	0	0	0	28	0	0	0	0	0	0	0	0	0	0
VLDLR	Very low-density lipoprotein receptor OS=Homo sapiens GN=VLDLR PE=1 SV=1	∞	0.355918	0	0	0	7.4314e-05	7.4314e-05	0	0	0	2	2	0	0	0	0	0	0	0	0	0	0
KRT3	Keratin, type II cytoskeletal 3 OS=Homo sapiens GN=KRT3 PE=1 SV=3	∞	0.355918	0.00084719	0	0	0	0.00084719	28	0	0	0	28	0	0	0	0	0	0	0	0	0	0
SDC2	Syndecan-2 OS=Homo sapiens GN=SDC2 PE=1 SV=2	∞	0.355918	0	0.00028114	0	0	0.00028114	0	2	0	0	2	0	0	0	0	0	0	0	0	0	0
ELOVL5	Elongation of very long chain fatty acids protein 5 OS=Homo sapiens GN=ELOVL5 PE=1 SV=1	∞	0.355918	0	0	0	0.00021698	0.00021698	0	0	0	2	2	0	0	0	0	0	0	0	0	0	0
FCF1	rRNA-processing protein FCF1 homolog OS=Homo sapiens GN=FCF1 PE=2 SV=1	∞	0.355918	0	0	0	0.00032766	0.00032766	0	0	0	2	2	0	0	0	0	0	0	0	0	0	0
KIAA0355	Uncharacterized protein KIAA0355 OS=Homo sapiens GN=KIAA0355 PE=1 SV=2	∞	0.355918	6.2154e-05	0	0	0	6.2154e-05	2	0	0	0	2	0	0	0	0	0	0	0	0	0	0
HSDL2	Hydroxysteroid dehydrogenase-like protein 2 OS=Homo sapiens GN=HSDL2 PE=1 SV=1	∞	0.355918	0	0	0	0.00015521	0.00015521	v	0	0	2	2	0	0	0	0	0	0	0	0	0	0
YIPF5	Protein YIPF5 OS=Homo sapiens GN=YIPF5 PE=1 SV=1	∞	0.355918	0.00025877	0	0	0	0.00025877	2	0	0	0	2	0	0	0	0	0	0	0	0	0	0
PRICKLE3	Prickle planar cell polarity protein 3 OS=Homo sapiens GN=PRICKLE3 PE=1 SV=2	∞	0.355918	0.00010814	0	0	0	0.00010814	2	0	0	0	2	0	0	0	0	0	0	0	0	0	0
SETD1B	Histone-lysine N-methyltransferase SETD1B OS=Homo sapiens GN=SETD1B PE=1 SV=3	∞	0.355918	0	0	3.1994e-05	0	3.1994e-05	0	0	3	0	3	0	0	0	0	0	0	0	0	0	0
MEAF6	Chromatin modification-related protein MEAF6 OS=Homo sapiens GN=MEAF6 PE=1 SV=1	∞	0.355918	0	0	0	0.0005095	0.0005095	0	0	0	3	3	0	0	0	0	0	0	0	0	0	0
STOM	Erythrocyte band 7 integral membrane protein OS=Homo sapiens GN=STOM PE=1 SV=3	∞	0.355918	0	0	0.0002184	0	0.0002184	0	0	2	0	2	0	0	0	0	0	0	0	0	0	0
ARHGAP1	Rho GTPase-activating protein 1 OS=Homo sapiens GN=ARHGAP1 PE=1 SV=1	∞	0.355918	0	0	0.00014328	0	0.00014328	0	0	2	0	2	0	0	0	0	0	0	0	0	0	0
TWF2	Twinfilin-2 OS=Homo sapiens GN=TWF2 PE=1 SV=2	∞	0.355918	0	0.00016192	0	0	0.00016192	0	2	0	0	2	0	0	0	0	0	0	0	0	0	0
CEP72	Centrosomal protein of 72 kDa OS=Homo sapiens GN=CEP72 PE=1 SV=2	∞	0.355918	0	0	0	0.00015041	0.00015041	0	0	0	3	3	0	0	0	0	0	0	0	0	0	0
ACTBL2	Beta-actin-like protein 2 OS=Homo sapiens GN=ACTBL2 PE=1 SV=2	∞	0.355918	0	0	0.00016729	0	0.00016729	0	0	20	0	20	0	0	0	0	0	0	0	0	0	0
SMPDL3B	Acid sphingomyelinase-like phosphodiesterase 3b OS=Homo sapiens GN=SMPDL3B PE=1 SV=2	∞	0.355918	0	0.0002484	0	0	0.0002484	0	4	0	0	4	0	0	0	0	0	0	0	0	0	0
RARS2	Probable arginine--tRNA ligase, mitochondrial OS=Homo sapiens GN=RARS2 PE=1 SV=1	∞	0.355918	0.00011506	0	0	0	0.00011506	2	0	0	0	2	0	0	0	0	0	0	0	0	0	0
MRPS11	28S ribosomal protein S11, mitochondrial OS=Homo sapiens GN=MRPS11 PE=1 SV=2	∞	0.355918	0.00051421	0	0	0	0.00051421	3	0	0	0	3	0	0	0	0	0	0	0	0	0	0
BAZ2A	Bromodomain adjacent to zinc finger domain protein 2A OS=Homo sapiens GN=BAZ2A PE=1 SV=4	∞	0.355918	0	0	0	3.4056e-05	3.4056e-05	0	0	0	2	2	0	0	0	0	0	0	0	0	0	0
ARPC2	Actin-related protein 2/3 complex subunit 2 OS=Homo sapiens GN=ARPC2 PE=1 SV=1	∞	0.355918	0	0	0.00020967	0	0.00020967	0	0	2	0	2	0	0	0	0	0	0	0	0	0	0
RSRC2	Arginine/serine-rich coiled-coil protein 2 OS=Homo sapiens GN=RSRC2 PE=1 SV=1	∞	0.355918	0	0	0.00014493	0	0.00014493	0	0	2	0	2	0	0	0	0	0	0	0	0	0	0
ARPC3	Actin-related protein 2/3 complex subunit 3 OS=Homo sapiens GN=ARPC3 PE=1 SV=3	∞	0.355918	0	0	0.00053005	0	0.00053005	0	0	3	0	3	0	0	0	0	0	0	0	0	0	0
SARS2	Serine--tRNA ligase, mitochondrial OS=Homo sapiens GN=SARS2 PE=1 SV=1	∞	0.355918	0	0	0.00012143	0	0.00012143	0	0	2	0	2	0	0	0	0	0	0	0	0	0	0
ARID1B	AT-rich interactive domain-containing protein 1B OS=Homo sapiens GN=ARID1B PE=1 SV=2	∞	0.355918	4.4614e-05	0	0	0	4.4614e-05	6	0	0	0	6	0	0	0	0	0	0	0	0	0	0
ZNF830	Zinc finger protein 830 OS=Homo sapiens GN=ZNF830 PE=1 SV=2	∞	0.355918	0.00026816	0	0	0	0.00026816	3	0	0	0	3	0	0	0	0	0	0	0	0	0	0
TRAF7	E3 ubiquitin-protein ligase TRAF7 OS=Homo sapiens GN=TRAF7 PE=1 SV=1	∞	0.355918	0	8.4343e-05	0	0	8.4343e-05	0	2	0	0	2	0	0	0	0	0	0	0	0	0	0
RHOG	Rho-related GTP-binding protein RhoG OS=Homo sapiens GN=RHOG PE=1 SV=1	∞	0.355918	0	0	0	0.00033967	0.00033967	0	0	0	2	2	0	0	0	0	0	0	0	0	0	0
WDR12	Ribosome biogenesis protein WDR12 OS=Homo sapiens GN=WDR12 PE=1 SV=2	∞	0.355918	0	0.00013359	0	0	0.00013359	0	2	0	0	2	0	0	0	0	0	0	0	0	0	0
TOP3A	DNA topoisomerase 3-alpha OS=Homo sapiens GN=TOP3A PE=1 SV=1	∞	0.355918	0	0	9.4255e-05	0	9.4255e-05	0	0	3	0	3	0	0	0	0	0	0	0	0	0	0
HOXA13	Homeobox protein Hox-A13 OS=Homo sapiens GN=HOXA13 PE=1 SV=3	∞	0.355918	0	0.00029129	0	0	0.00029129	0	4	0	0	4	0	0	0	0	0	0	0	0	0	0
TCF20	Transcription factor 20 OS=Homo sapiens GN=TCF20 PE=1 SV=3	∞	0.355918	0	8.6495e-05	0	0	8.6495e-05	0	6	0	0	6	0	0	0	0	0	0	0	0	0	0
HTATSF1	HIV Tat-specific factor 1 OS=Homo sapiens GN=HTATSF1 PE=1 SV=1	∞	0.355918	0	0	8.3311e-05	0	8.3311e-05	0	0	2	0	2	0	0	0	0	0	0	0	0	0	0
NDUFV1	NADH dehydrogenase [ubiquinone] flavoprotein 1, mitochondrial OS=Homo sapiens GN=NDUFV1 PE=1 SV=4	∞	0.355918	0.00014333	0	0	0	0.00014333	2	0	0	0	2	0	0	0	0	0	0	0	0	0	0
KBTBD7	Kelch repeat and BTB domain-containing protein 7 OS=Homo sapiens GN=KBTBD7 PE=1 SV=1	∞	0.355918	0	8.2617e-05	0	0	8.2617e-05	0	2	0	0	2	0	0	0	0	0	0	0	0	0	0
RRP1	Ribosomal RNA processing protein 1 homolog A OS=Homo sapiens GN=RRP1 PE=1 SV=1	∞	0.355918	0	0.00024516	0	0	0.00024516	0	4	0	0	4	0	0	0	0	0	0	0	0	0	0
PALB2	Partner and localizer of BRCA2 OS=Homo sapiens GN=PALB2 PE=1 SV=1	∞	0.355918	0	0	7.9552e-05	0	7.9552e-05	0	0	3	0	3	0	0	0	0	0	0	0	0	0	0
SATB2	DNA-binding protein SATB2 OS=Homo sapiens GN=SATB2 PE=1 SV=2	∞	0.355918	0	0	0	8.8508e-05	8.8508e-05	0	0	0	5	5	0	0	0	0	0	0	0	0	0	0
BUD31	Protein BUD31 homolog OS=Homo sapiens GN=BUD31 PE=1 SV=2	∞	0.355918	0	0.00098108	0	0	0.00098108	0	5	0	0	5	0	0	0	0	0	0	0	0	0	0
FAM184B	Protein FAM184B OS=Homo sapiens GN=FAM184B PE=2 SV=3	∞	0.355918	0	5.3311e-05	0	0	5.3311e-05	0	2	0	0	2	0	0	0	0	0	0	0	0	0	0
PHF14	PHD finger protein 14 OS=Homo sapiens GN=PHF14 PE=1 SV=2	∞	0.355918	0	0.00012727	0	0	0.00012727	0	4	0	0	4	0	0	0	0	0	0	0	0	0	0
SIX5	Homeobox protein SIX5 OS=Homo sapiens GN=SIX5 PE=1 SV=3	∞	0.355918	0	0	0.00012767	0	0.00012767	0	0	3	0	3	0	0	0	0	0	0	0	0	0	0
MEF2D	Myocyte-specific enhancer factor 2D OS=Homo sapiens GN=MEF2D PE=1 SV=1	∞	0.355918	0	0	0	0.00024905	0.00024905	0	0	0	4	4	0	0	0	0	0	0	0	0	0	0
ARID3A	AT-rich interactive domain-containing protein 3A OS=Homo sapiens GN=ARID3A PE=1 SV=2	∞	0.355918	0	9.5295e-05	0	0	9.5295e-05	0	2	0	0	2	0	0	0	0	0	0	0	0	0	0
GTF2B	Transcription initiation factor IIB OS=Homo sapiens GN=GTF2B PE=1 SV=1	∞	0.355918	0	0	0.00019905	0	0.00019905	0	0	2	0	2	0	0	0	0	0	0	0	0	0	0
RBMXL1	RNA binding motif protein, X-linked-like-1 OS=Homo sapiens GN=RBMXL1 PE=1 SV=1	∞	0.355918	0	0.00028979	0	0	0.00028979	0	17	0	0	17	0	0	0	0	0	0	0	0	0	0
RAI2	Retinoic acid-induced protein 2 OS=Homo sapiens GN=RAI2 PE=1 SV=2	∞	0.355918	0	0	0	0.00012241	0.00012241	0	0	0	2	2	0	0	0	0	0	0	0	0	0	0
ATP13A3	Probable cation-transporting ATPase 13A3 OS=Homo sapiens GN=ATP13A3 PE=1 SV=4	∞	0.355918	0	0	0	5.2917e-05	5.2917e-05	0	0	0	2	2	0	0	0	0	0	0	0	0	0	0
RBM6	RNA-binding protein 6 OS=Homo sapiens GN=RBM6 PE=1 SV=5	∞	0.355918	0	7.5481e-05	0	0	7.5481e-05	0	3	0	0	3	0	0	0	0	0	0	0	0	0	0
MPHOSPH10	U3 small nucleolar ribonucleoprotein protein MPP10 OS=Homo sapiens GN=MPHOSPH10 PE=1 SV=2	∞	0.355918	0	0.00012447	0	0	0.00012447	0	3	0	0	3	0	0	0	0	0	0	0	0	0	0
ARPC5L	Actin-related protein 2/3 complex subunit 5-like protein OS=Homo sapiens GN=ARPC5L PE=1 SV=1	∞	0.355918	0	0	0.00041111	0	0.00041111	0	0	2	0	2	0	0	0	0	0	0	0	0	0	0
MAK16	Protein MAK16 homolog OS=Homo sapiens GN=MAK16 PE=1 SV=2	∞	0.355918	0	0.00018837	0	0	0.00018837	0	2	0	0	2	0	0	0	0	0	0	0	0	0	0
CALCOCO2	Calcium-binding and coiled-coil domain-containing protein 2 OS=Homo sapiens GN=CALCOCO2 PE=1 SV=1	∞	0.355918	0.00014911	0	0	0	0.00014911	2	0	0	0	2	0	0	0	0	0	0	0	0	0	0
NDUFS2	NADH dehydrogenase [ubiquinone] iron-sulfur protein 2, mitochondrial OS=Homo sapiens GN=NDUFS2 PE=1 SV=2	∞	0.355918	0	0	0	0.00014012	0.00014012	0	0	0	2	2	0	0	0	0	0	0	0	0	0	0
MED17	Mediator of RNA polymerase II transcription subunit 17 OS=Homo sapiens GN=MED17 PE=1 SV=2	∞	0.355918	0	0.00017361	0	0	0.00017361	0	4	0	0	4	0	0	0	0	0	0	0	0	0	0
SLC25A22	Mitochondrial glutamate carrier 1 OS=Homo sapiens GN=SLC25A22 PE=1 SV=1	∞	0.355918	0	0	0.00019474	0	0.00019474	0	0	2	0	2	0	0	0	0	0	0	0	0	0	0
COASY	Bifunctional coenzyme A synthase OS=Homo sapiens GN=COASY PE=1 SV=4	∞	0.355918	0	0	0	0.00011503	0.00011503	0	0	0	2	2	0	0	0	0	0	0	0	0	0	0
TCF7L2	Transcription factor 7-like 2 OS=Homo sapiens GN=TCF7L2 PE=1 SV=2	∞	0.355918	0	0	0.00010161	0	0.00010161	0	0	2	0	2	0	0	0	0	0	0	0	0	0	0
BAHCC1	BAH and coiled-coil domain-containing protein 1 OS=Homo sapiens GN=BAHCC1 PE=1 SV=3	∞	0.355918	0	0	2.4118e-05	0	2.4118e-05	0	0	2	0	2	0	0	0	0	0	0	0	0	0	0
C15orf39	Uncharacterized protein C15orf39 OS=Homo sapiens GN=C15orf39 PE=1 SV=3	∞	0.355918	9.5279e-05	0	0	0	9.5279e-05	3	0	0	0	3	0	0	0	0	0	0	0	0	0	0
CHD1	Chromodomain-helicase-DNA-binding protein 1 OS=Homo sapiens GN=CHD1 PE=1 SV=2	∞	0.355918	0	6.6094e-05	0	0	6.6094e-05	0	5	0	0	5	0	0	0	0	0	0	0	0	0	0
CXADR	Coxsackievirus and adenovirus receptor OS=Homo sapiens GN=CXADR PE=1 SV=1	∞	0.355918	0	0	0	0.00017774	0.00017774	0	0	0	2	2	0	0	0	0	0	0	0	0	0	0
WDR74	WD repeat-containing protein 74 OS=Homo sapiens GN=WDR74 PE=1 SV=1	∞	0.355918	0	0.00022017	0	0	0.00022017	0	3	0	0	3	0	0	0	0	0	0	0	0	0	0
ZSCAN18	Zinc finger and SCAN domain-containing protein 18 OS=Homo sapiens GN=ZSCAN18 PE=2 SV=2	∞	0.355918	0.0001304	0	0	0	0.0001304	2	0	0	0	2	0	0	0	0	0	0	0	0	0	0
IRF2BP1	Interferon regulatory factor 2-binding protein 1 OS=Homo sapiens GN=IRF2BP1 PE=1 SV=1	∞	0.355918	0	0	0.0001077	0	0.0001077	0	0	2	0	2	0	0	0	0	0	0	0	0	0	0
DCTN4	Dynactin subunit 4 OS=Homo sapiens GN=DCTN4 PE=1 SV=1	∞	0.355918	0	0.00012285	0	0	0.00012285	0	2	0	0	2	0	0	0	0	0	0	0	0	0	0
FBXO45	F-box/SPRY domain-containing protein 1 OS=Homo sapiens GN=FBXO45 PE=1 SV=1	∞	0.355918	0	0.00029638	0	0	0.00029638	0	3	0	0	3	0	0	0	0	0	0	0	0	0	0
BCS1L	Mitochondrial chaperone BCS1 OS=Homo sapiens GN=BCS1L PE=1 SV=1	∞	0.355918	0.00015872	0	0	0	0.00015872	2	0	0	0	2	0	0	0	0	0	0	0	0	0	0
PELP1	Proline-, glutamic acid- and leucine-rich protein 1 OS=Homo sapiens GN=PELP1 PE=1 SV=2	∞	0.355918	0	0	0	5.7413e-05	5.7413e-05	0	0	0	2	2	0	0	0	0	0	0	0	0	0	0
MBD6	Methyl-CpG-binding domain protein 6 OS=Homo sapiens GN=MBD6 PE=1 SV=2	∞	0.355918	0	0	6.2711e-05	0	6.2711e-05	0	0	2	0	2	0	0	0	0	0	0	0	0	0	0
PROSER1	Proline and serine-rich protein 1 OS=Homo sapiens GN=PROSER1 PE=1 SV=2	∞	0.355918	0	0	0	6.8725e-05	6.8725e-05	0	0	0	2	2	0	0	0	0	0	0	0	0	0	0
MRPS23	28S ribosomal protein S23, mitochondrial OS=Homo sapiens GN=MRPS23 PE=1 SV=2	∞	0.355918	0	0	0	0.00051218	0.00051218	0	0	0	3	3	0	0	0	0	0	0	0	0	0	0
CLN6	Ceroid-lipofuscinosis neuronal protein 6 OS=Homo sapiens GN=CLN6 PE=1 SV=1	∞	0.355918	0	0	0.00020225	0	0.00020225	0	0	2	0	2	0	0	0	0	0	0	0	0	0	0
SHB	SH2 domain-containing adapter protein B OS=Homo sapiens GN=SHB PE=1 SV=2	∞	0.355918	0	0	0	0.00012746	0.00012746	0	0	0	2	2	0	0	0	0	0	0	0	0	0	0
WTAP	Pre-mRNA-splicing regulator WTAP OS=Homo sapiens GN=WTAP PE=1 SV=2	∞	0.355918	0	0	0	0.00016383	0.00016383	0	0	0	2	2	0	0	0	0	0	0	0	0	0	0
HIGD1A	HIG1 domain family member 1A, mitochondrial OS=Homo sapiens GN=HIGD1A PE=1 SV=1	∞	0.355918	0	0	0	0.0006976	0.0006976	0	0	0	2	2	0	0	0	0	0	0	0	0	0	0
MRPS18B	28S ribosomal protein S18b, mitochondrial OS=Homo sapiens GN=MRPS18B PE=1 SV=1	∞	0.355918	0	0	0	0.00025146	0.00025146	0	0	0	2	2	0	0	0	0	0	0	0	0	0	0
MRPS26	28S ribosomal protein S26, mitochondrial OS=Homo sapiens GN=MRPS26 PE=1 SV=1	∞	0.355918	0	0	0	0.00031647	0.00031647	0	0	0	2	2	0	0	0	0	0	0	0	0	0	0
RAI1	Retinoic acid-induced protein 1 OS=Homo sapiens GN=RAI1 PE=1 SV=2	∞	0.355918	0	2.9648e-05	0	0	2.9648e-05	0	2	0	0	2	0	0	0	0	0	0	0	0	0	0
USP34	Ubiquitin carboxyl-terminal hydrolase 34 OS=Homo sapiens GN=USP34 PE=1 SV=2	29.434	0.000216103	0.00054389	0.00034263	0.0004878	0.00032932	0.00042591	58	43	55	36	48	0	0	0	1.447e-05	1.447e-05	0	0	0	2	2
TSHZ3	Teashirt homolog 3 OS=Homo sapiens GN=TSHZ3 PE=1 SV=2	24.9439	0.00135343	0.0011997	0.00054889	0.0014547	0.0012003	0.0011009	39	21	50	40	37.5	0	0	4.4135e-05	0	4.4135e-05	0	0	2	0	2
HOOK3	Protein Hook homolog 3 OS=Homo sapiens GN=HOOK3 PE=1 SV=2	23.9977	2.73552e-05	0.0024546	0.0016134	0.0022339	0.0020782	0.00209503	53	41	51	46	47.75	7.4724e-05	9.9878e-05	0	0	8.7301e-05	2	3	0	0	2.5
KRT13	Keratin, type I cytoskeletal 13 OS=Homo sapiens GN=KRT13 PE=1 SV=4	21.5832	0.399836	0.0022507	0	0	0	0.0022507	48	0	0	0	48	0	0.00010439	0.00010417	0	0.00010428	0	28	13	0	20.5
IGF2R	Cation-independent mannose-6-phosphate receptor OS=Homo sapiens GN=IGF2R PE=1 SV=3	20.9335	4.29531e-06	0.00097448	0.00078266	0.0010353	0.0010157	0.000952035	73	69	82	78	75.5	4.3076e-05	0	4.7882e-05	0	4.5479e-05	4	0	5	0	4.5
SHMT2	Serine hydroxymethyltransferase, mitochondrial OS=Homo sapiens GN=SHMT2 PE=1 SV=3	11.6594	9.29174e-07	0.0022432	0.00185	0.0020592	0.0019952	0.0020369	34	33	33	31	32.75	0.00015968	0.00018972	0	0	0.0001747	3	4	0	0	3.5
MYCBP2	E3 ubiquitin-protein ligase MYCBP2 OS=Homo sapiens GN=MYCBP2 PE=1 SV=3	8.92983	0.309492	0	0.00021313	7.4558e-05	0	0.000143844	0	35	11	0	23	1.7344e-05	2.0607e-05	1.5424e-05	1.1058e-05	1.61082e-05	3	4	3	2	3
MYL12A	Myosin regulatory light chain 12A OS=Homo sapiens GN=MYL12A PE=1 SV=2	8.67561	3.31534e-06	0.01614	0.019002	0.019863	0.017452	0.0181143	83	115	108	92	99.5	0.0036082	0.0015377	0.0012555	0.0019504	0.00208795	23	11	9	13	14
MYH10	Myosin-10 OS=Homo sapiens GN=MYH10 PE=1 SV=3	7.41949	0.000105482	0.0060076	0.0074212	0.0075919	0.0053188	0.00658488	426	618	560	383	496.75	0.0017649	0.0008952	0.00042253	0.00046741	0.00088751	154	87	49	48	84.5
HOOK1	Protein Hook homolog 1 OS=Homo sapiens GN=HOOK1 PE=1 SV=2	6.96914	4.03595e-06	0.0037455	0.0030273	0.0031536	0.0036092	0.0033839	82	78	73	81	78.5	0.00062643	0.00036119	0.00042598	0.00052862	0.000485555	17	11	13	15	14
FAM135A	Protein FAM135A OS=Homo sapiens GN=FAM135A PE=1 SV=2	6.68774	9.76632e-07	0.0013169	0.0011377	0.0012871	0.001199	0.00123517	60	61	62	56	59.75	0.00014165	0.00012623	0.00026768	0.00020321	0.000184693	8	8	17	12	11.25
MYL6	Myosin light polypeptide 6 OS=Homo sapiens GN=MYL6 PE=1 SV=2	6.68773	0.0064887	0.0074873	0.015718	0.015412	0.007304	0.0114803	35	95	84	37	62.75	0.0028425	0.0014248	0.0015798	0.0010194	0.00171663	18	11	12	8	12.25
IRF2BP2	Interferon regulatory factor 2-binding protein 2 OS=Homo sapiens GN=IRF2BP2 PE=1 SV=2	6.6683	0.00016203	0.0015861	0.0010108	0.0013394	0.0011052	0.00126037	28	21	25	20	23.5	0	0	0.00020319	0.00017483	0.00018901	0	0	5	4	4.5
MYL6B	Myosin light chain 6B OS=Homo sapiens GN=MYL6B PE=1 SV=1	6.64617	0.0256718	0.0011191	0.0035319	0.00378	0.0014036	0.00245865	7	26	25	9	16.75	0.00077382	0.00022985	0.00022938	0.00024669	0.000369935	6	2	2	2	3
ESS2	Splicing factor ESS-2 homolog OS=Homo sapiens GN=ESS2 PE=1 SV=1	6.41115	3.28113e-05	0.00069858	0.00059359	0.00052857	0.00074962	0.00064259	10	10	8	11	9.75	0	0	0.00010023	0	0.00010023	0	0	2	0	2
GSN	Gelsolin OS=Homo sapiens GN=GSN PE=1 SV=1	6.34634	0.00248001	0.00025513	0.00046971	0.00064347	0.00037333	0.00043541	6	13	16	9	11	6.8608e-05	0	0	0	6.8608e-05	2	0	0	0	2
NCOR2	Nuclear receptor corepressor 2 OS=Homo sapiens GN=NCOR2 PE=1 SV=2	6.27328	0.00196529	0.00036874	0.00014547	0.00026156	0.00024409	0.000254965	33	16	28	24	25.25	0	0	0	4.0643e-05	4.0643e-05	0	0	0	5	5
SCAMP1	Secretory carrier-associated membrane protein 1 OS=Homo sapiens GN=SCAMP1 PE=1 SV=2	6.17791	0.00598487	0.0011806	0.00050157	0.00055828	0.0012476	0.000872012	12	6	6	13	9.25	0	0	0.00014115	0	0.00014115	0	0	2	0	2
UBR5	E3 ubiquitin-protein ligase UBR5 OS=Homo sapiens GN=UBR5 PE=1 SV=2	6.17168	0.000200866	0.00083161	0.00065615	0.00070787	0.00098508	0.000795177	70	65	63	85	70.75	0.00011501	5.1242e-05	0.0001108	0.00023832	0.000128843	12	6	13	26	14.25
TPM3	Tropomyosin alpha-3 chain OS=Homo sapiens GN=TPM3 PE=1 SV=2	6.13997	2.87201e-05	0.0012834	0.0009914	0.0013242	0.0010244	0.00115585	25	33	35	21	28.5	0.00018825	0	0	0	0.00018825	5	0	0	0	5
WDR46	WD repeat-containing protein 46 OS=Homo sapiens GN=WDR46 PE=1 SV=3	5.91005	0.444011	0	0.0004632	0	0	0.0004632	0	10	0	0	10	0	7.8375e-05	0	0	7.8375e-05	0	2	0	0	2
MYH9	Myosin-9 OS=Homo sapiens GN=MYH9 PE=1 SV=4	5.73107	0.000102625	0.011791	0.01469	0.014746	0.010708	0.0129838	695	1019	919	647	820	0.0040376	0.0017318	0.0018135	0.0014791	0.0022655	295	142	149	113	174.75
JMJD1C	Probable JmjC domain-containing histone demethylation protein 2C OS=Homo sapiens GN=JMJD1C PE=1 SV=2	5.50265	0.00121943	0.00020946	0.00010012	0.00017335	0.00015325	0.000159045	16	9	14	12	12.75	0	2.8233e-05	2.8175e-05	3.0302e-05	2.89033e-05	0	3	3	3	3
BCOR	BCL-6 corepressor OS=Homo sapiens GN=BCOR PE=1 SV=1	5.45396	0.000286039	0.0011558	0.00069229	0.0010035	0.00090568	0.000939318	61	43	56	49	52.25	0	0.00020431	0.00012233	0.00019004	0.000172227	0	15	9	13	12.3333
MYO5A	Unconventional myosin-Va OS=Homo sapiens GN=MYO5A PE=1 SV=2	5.38244	0.00151677	0.00025096	0.00042649	0.00050862	0.00034974	0.000383953	14	28	30	20	23	0.00010123	9.0205e-05	3.858e-05	5.5322e-05	7.13342e-05	7	7	3	4	5.25
HRNR	Hornerin OS=Homo sapiens GN=HRNR PE=1 SV=2	5.34993	0.00605887	0.00026835	9.914e-05	0.00025381	0.00028455	0.000226462	23	10	23	25	20.25	7.5301e-05	2.5162e-05	4.1851e-05	2.7006e-05	4.233e-05	8	3	5	3	4.75
WDR43	WD repeat-containing protein 43 OS=Homo sapiens GN=WDR43 PE=1 SV=3	5.31904	0.455277	0	0.00037562	0	0	0.00037562	0	9	0	0	9	0	7.0618e-05	0	0	7.0618e-05	0	2	0	0	2
PCGF1	Polycomb group RING finger protein 1 OS=Homo sapiens GN=PCGF1 PE=1 SV=2	5.20155	0.00364444	0.0012839	0.00054546	0.00084999	0.0012524	0.000982938	10	5	7	10	8	0	0.00018459	0.00018421	0.00019811	0.00018897	0	2	2	2	2
SSBP1	Single-stranded DNA-binding protein, mitochondrial OS=Homo sapiens GN=SSBP1 PE=1 SV=1	5.07797	9.94876e-05	0.0017974	0.0024819	0.00255	0.0026301	0.00236485	8	13	12	12	11.25	0.00036251	0.00048455	0.00032237	0.0006934	0.000465707	2	3	2	4	2.75
TPM4	Tropomyosin alpha-4 chain OS=Homo sapiens GN=TPM4 PE=1 SV=3	4.86653	3.91193e-05	0.0025476	0.0036458	0.0031703	0.00327	0.00315842	19	32	25	25	25.25	0.00064901	0	0	0	0.00064901	6	0	0	0	6
TMOD3	Tropomodulin-3 OS=Homo sapiens GN=TMOD3 PE=1 SV=1	4.72929	5.01142e-05	0.0018893	0.0020067	0.0024123	0.0018431	0.00203785	20	25	27	20	23	0.00068589	0.00033955	0.00040662	0.00029154	0.0004309	9	5	6	4	6
TET2	Methylcytosine dioxygenase TET2 OS=Homo sapiens GN=TET2 PE=1 SV=3	4.58784	0.104662	0.0001661	0	0.00012567	4.8609e-05	0.00011346	10	0	8	3	7	0	0	2.3831e-05	2.563e-05	2.47305e-05	0	0	2	2	2
KMT2D	Histone-lysine N-methyltransferase 2D OS=Homo sapiens GN=KMT2D PE=1 SV=2	4.35888	0.00796527	0.0002162	9.1853e-05	0.00014768	0.00017575	0.000157871	36	18	26	30	27.5	9.6897e-06	3.8855e-05	1.2925e-05	8.3403e-05	3.62182e-05	2	9	3	18	8
AKTIP	AKT-interacting protein OS=Homo sapiens GN=AKTIP PE=1 SV=1	4.26775	6.54421e-05	0.0014804	0.0012579	0.0012925	0.0011109	0.00128542	13	13	12	10	12	0.00027561	0	0.00032678	0	0.000301195	3	0	4	0	3.5
PES1	Pescadillo homolog OS=Homo sapiens GN=PES1 PE=1 SV=1	3.9644	0.652697	0	0.00043247	0	0	0.00043247	0	9	0	0	9	0.00013687	8.1307e-05	0	0	0.000109089	3	2	0	0	2.5
PPIL2	Peptidyl-prolyl cis-trans isomerase-like 2 OS=Homo sapiens GN=PPIL2 PE=1 SV=1	3.8608	0.00520284	0.00038368	0.00032602	0.0006048	0.00081095	0.000531363	6	6	10	13	8.75	0	0	0.00013763	0	0.00013763	0	0	3	0	3
TPM1	Tropomyosin alpha-1 chain OS=Homo sapiens GN=TPM1 PE=1 SV=2	3.83694	0.00058493	0.0019905	0.0018903	0.0029899	0.0018275	0.00217455	21	31	32	20	26	0.00056674	0	0	0	0.00056674	7	0	0	0	7
LGALS8	Galectin-8 OS=Homo sapiens GN=LGALS8 PE=1 SV=4	3.7688	0.000470983	0.00073428	0.00053479	0.00059526	0.00040931	0.00056841	7	6	6	4	5.75	0	0.00015082	0	0	0.00015082	0	2	0	0	2
PYCR2	Pyrroline-5-carboxylate reductase 2 OS=Homo sapiens GN=PYCR2 PE=1 SV=1	3.75284	0.00119675	0.001143	0.00088297	0.00088452	0.0010137	0.000981048	11	10	9	10	10	0.00058682	0.0001494	0.00014909	0.00016035	0.000261415	7	2	2	2	3.25
CDC40	Pre-mRNA-processing factor 17 OS=Homo sapiens GN=CDC40 PE=1 SV=1	3.67468	0.679663	0	0.0003904	0	0	0.0003904	0	8	0	0	8	0	0.00012386	0	8.8621e-05	0.00010624	0	3	0	2	2.5
PTBP2	Polypyrimidine tract-binding protein 2 OS=Homo sapiens GN=PTBP2 PE=1 SV=1	3.64312	0.0236675	0.0005636	0.00074495	0.00023691	0.00030544	0.000462725	11	16	4	6	9.25	0.00010104	0.00013505	0	0.00014495	0.000127013	2	5	0	4	3.66667
SPEN	Msx2-interacting protein OS=Homo sapiens GN=SPEN PE=1 SV=1	3.61937	0.00276777	0.00053545	0.00033931	0.00050642	0.00061087	0.000498012	59	44	59	69	57.75	2.9286e-05	0.00024139	9.766e-05	0.00018205	0.000137596	4	37	15	26	20.5
BRCA2	Breast cancer type 2 susceptibility protein OS=Homo sapiens GN=BRCA2 PE=1 SV=3	3.3944	0.00633714	0.00033077	0.00013226	0.00026684	0.00024675	0.000244155	34	16	29	26	26.25	0	4.1962e-05	8.3751e-05	9.0073e-05	7.19287e-05	0	6	12	12	10
BLM	Bloom syndrome protein OS=Homo sapiens GN=BLM PE=1 SV=1	3.36773	0.000540948	0.0014549	0.00091724	0.0013761	0.0011675	0.00122894	62	46	62	51	55.25	0.00043542	0.00023617	0.00035353	0.00043454	0.000364915	23	14	21	24	20.5
KDM6A	Lysine-specific demethylase 6A OS=Homo sapiens GN=KDM6A PE=1 SV=2	3.3227	0.0145636	0.00052216	0.00020168	0.00026938	0.00041676	0.000352495	22	10	12	18	15.5	0	0.00010237	5.1081e-05	0.00016481	0.000106087	0	6	3	9	6
GSE1	Genetic suppressor element 1 OS=Homo sapiens GN=GSE1 PE=1 SV=3	3.29816	0.00177137	0.00021859	0.00011608	0.00015505	0.00018658	0.000169075	8	5	6	7	6.5	0	3.9284e-05	0	6.3243e-05	5.12635e-05	0	2	0	3	2.5
ZMYM2	Zinc finger MYM-type protein 2 OS=Homo sapiens GN=ZMYM2 PE=1 SV=1	3.27044	0.000531613	0.0011108	0.00075921	0.0011648	0.0010365	0.00101783	46	37	51	44	44.5	0.00019481	0.00024304	0.00041577	0.00039126	0.00031122	10	14	24	21	17.25
ACTG1	Actin, cytoplasmic 2 OS=Homo sapiens GN=ACTG1 PE=1 SV=1	3.25772	0.000355324	0.017203	0.023433	0.023231	0.019117	0.020746	194	311	277	221	250.75	0.008942	0.0080956	0.0042621	0.0041733	0.00636825	125	127	67	61	95
UTP15	U3 small nucleolar RNA-associated protein 15 homolog OS=Homo sapiens GN=UTP15 PE=1 SV=3	3.2505	0.532709	0	0.00060001	0	0	0.00060001	0	11	0	0	11	0	0.00018459	0	0	0.00018459	0	4	0	0	4
ASPM	Abnormal spindle-like microcephaly-associated protein OS=Homo sapiens GN=ASPM PE=1 SV=2	3.19354	0.00787814	8.6072e-05	4.8758e-05	9.0451e-05	4.6647e-05	6.7982e-05	9	6	10	5	7.5	0	2.0625e-05	1.3722e-05	2.9515e-05	2.12873e-05	0	3	2	4	3
ZNF281	Zinc finger protein 281 OS=Homo sapiens GN=ZNF281 PE=1 SV=1	3.19231	0.00181365	0.0005573	0.00034727	0.00059737	0.00043493	0.000484218	15	11	17	12	13.75	8.9919e-05	0.00016025	0.00021323	0.00014333	0.000151682	3	6	8	5	5.5
TRIM33	E3 ubiquitin-protein ligase TRIM33 OS=Homo sapiens GN=TRIM33 PE=1 SV=3	3.18595	0.000865364	0.00026555	0.0001755	0.00025115	0.00028783	0.000245008	9	7	9	10	8.75	7.1409e-05	8.4842e-05	0.00010583	4.5529e-05	7.69025e-05	3	4	5	2	3.5
ELL	RNA polymerase II elongation factor ELL OS=Homo sapiens GN=ELL PE=1 SV=1	3.15951	0.0174005	0.00085674	0.000273	0.00060772	0.00062682	0.00059107	16	6	12	12	11.5	0	0.00011548	0.00011524	0.00033051	0.000187077	0	3	3	8	4.66667
BRWD1	Bromodomain and WD repeat-containing protein 1 OS=Homo sapiens GN=BRWD1 PE=1 SV=4	3.14343	0.0189963	4.2999e-05	7.3073e-05	4.0668e-05	0.00011186	6.715e-05	3	6	3	8	5	0	2.0607e-05	0	2.2117e-05	2.1362e-05	0	2	0	2	2
EMD	Emerin OS=Homo sapiens GN=EMD PE=1 SV=1	3.13974	0.000897093	0.0014401	0.0024473	0.0022287	0.0022988	0.00210372	11	22	18	18	17.25	0.00084491	0.00056467	0.0005635	0.00070705	0.000670033	8	6	6	7	6.75
NCOR1	Nuclear receptor corepressor 1 OS=Homo sapiens GN=NCOR1 PE=1 SV=2	3.1376	0.0028472	0.0007768	0.00048636	0.00076047	0.00059825	0.00065547	57	42	59	45	50.75	3.2983e-05	0.0002939	0.00022486	0.00028389	0.000208908	3	30	23	27	20.75
CABIN1	Calcineurin-binding protein cabin-1 OS=Homo sapiens GN=CABIN1 PE=1 SV=1	3.12678	0.0123738	0.0002097	8.9092e-05	0.00011333	0.00014612	0.000139561	14	7	8	10	9.75	0	4.3071e-05	2.1491e-05	6.934e-05	4.4634e-05	0	4	2	6	4
PIAS1	E3 SUMO-protein ligase PIAS1 OS=Homo sapiens GN=PIAS1 PE=1 SV=2	3.1167	0.00183657	0.00091942	0.00056423	0.00072465	0.00054811	0.000689102	18	13	15	11	14.25	0.00024724	0.0001836	0.00025651	0.00019705	0.0002211	6	5	7	5	5.75
TMOD2	Tropomodulin-2 OS=Homo sapiens GN=TMOD2 PE=1 SV=1	3.10123	0.0435118	0.00018947	0.00080499	0.0007168	0.00018483	0.000474023	2	11	9	2	6	0.00015285	0	0	0	0.00015285	2	0	0	0	2
RPRD1B	Regulation of nuclear pre-mRNA domain-containing protein 1B OS=Homo sapiens GN=RPRD1B PE=1 SV=1	3.08791	0.00585371	0.001122	0.0006067	0.0011577	0.00099504	0.00097036	11	7	12	10	10	0.00057602	0.00014665	0.00021952	0.00031479	0.000314245	7	2	3	4	4
FAM208A	Protein TASOR OS=Homo sapiens GN=FAM208A PE=1 SV=3	3.06887	0.00128549	0.00067699	0.00042298	0.00067796	0.00050503	0.00057074	34	25	36	26	30.25	0.00012851	0.00017177	0.00022855	0.00021508	0.000185977	8	12	16	14	12.5
SNX1	Sorting nexin-1 OS=Homo sapiens GN=SNX1 PE=1 SV=3	3.03778	0.000827994	0.00063702	0.00043303	0.00054224	0.00043499	0.00051182	10	8	9	7	8.5	0.00015417	0	0.0001828	0	0.000168485	3	0	4	0	3.5
ZBTB21	Zinc finger and BTB domain-containing protein 21 OS=Homo sapiens GN=ZBTB21 PE=1 SV=2	3.02112	0.000564078	0.00031194	0.00023855	0.00029503	0.00027387	0.000279848	10	9	10	9	9.5	5.033e-05	6.7273e-05	0.00015665	9.6269e-05	9.26305e-05	2	3	7	4	4
YLPM1	YLP motif-containing protein 1 OS=Homo sapiens GN=YLPM1 PE=1 SV=3	2.99147	0.0029718	0.00025566	0.00017379	0.0003224	0.0003159	0.000266937	15	12	20	19	16.5	5.4999e-05	8.5766e-05	9.7817e-05	0.00011835	8.9233e-05	4	7	8	9	7
HMG20A	High mobility group protein 20A OS=Homo sapiens GN=HMG20A PE=1 SV=1	2.95493	0.553956	0	0.00040713	0	0	0.00040713	0	5	0	0	5	0	0.00013778	0	0	0.00013778	0	2	0	0	2
DDX41	Probable ATP-dependent RNA helicase DDX41 OS=Homo sapiens GN=DDX41 PE=1 SV=2	2.92405	0.00693874	0.00048114	0.00022713	0.00035394	0.00046936	0.000382893	9	5	7	9	7.5	0.00017251	0.00015372	0.00011506	8.2494e-05	0.000130946	4	4	3	2	3.25
KDM2B	Lysine-specific demethylase 2B OS=Homo sapiens GN=KDM2B PE=1 SV=1	2.87557	0.010944	0.00029867	8.4596e-05	0.00030602	0.00019424	0.000220882	12	4	13	8	9.25	0	0	0	7.6813e-05	7.6813e-05	0	0	0	4	4
DNAJC13	DnaJ homolog subfamily C member 13 OS=Homo sapiens GN=DNAJC13 PE=1 SV=5	2.86468	0.0109308	0.0001186	5.0388e-05	7.0106e-05	0.00010123	8.5081e-05	8	4	5	7	6	3.5879e-05	2.1315e-05	3.1906e-05	0	2.97e-05	3	2	3	0	2.66667
SALL2	Sal-like protein 2 OS=Homo sapiens GN=SALL2 PE=1 SV=4	2.8569	0.00133088	0.00066042	0.00039282	0.0004997	0.0005154	0.000517085	20	14	16	16	16.5	0.00018648	0.00011869	0.00018951	0.0002293	0.000180995	7	5	8	9	7.25
RREB1	Ras-responsive element-binding protein 1 OS=Homo sapiens GN=RREB1 PE=1 SV=3	2.81301	0.00174268	7.8844e-05	0.00010049	9.3212e-05	5.7685e-05	8.25578e-05	4	6	5	3	4.5	0	0	2.8281e-05	3.0416e-05	2.93485e-05	0	0	2	2	2
CCNT1	Cyclin-T1 OS=Homo sapiens GN=CCNT1 PE=1 SV=1	2.79539	0.00178136	0.00050382	0.00050594	0.00069311	0.00058085	0.00057093	11	13	16	13	13.25	7.39e-05	0.00016463	0.00029572	0.00028271	0.00020424	2	5	9	8	6
KRT6C	Keratin, type II cytoskeletal 6C OS=Homo sapiens GN=KRT6C PE=1 SV=3	2.78785	0.568186	0.00023583	0	0	0	0.00023583	48	0	0	0	48	0	0	8.4592e-05	0	8.4592e-05	0	0	55	0	55
MYO18A	Unconventional myosin-XVIIIa OS=Homo sapiens GN=MYO18A PE=1 SV=3	2.77034	0.0152426	0.00012951	0.00027512	0.00022967	0.00018951	0.000205952	8	20	15	12	13.75	0.00014366	4.6552e-05	6.9684e-05	3.7472e-05	7.4342e-05	11	4	6	3	6
TRMT10C	tRNA methyltransferase 10 homolog C OS=Homo sapiens GN=TRMT10C PE=1 SV=2	2.74838	0.0290157	0.00057758	0.00014022	0.00031216	0.00032197	0.000337982	7	2	4	4	4.25	0	0.00011863	0	0.00012732	0.000122975	0	2	0	2	2
EPC1	Enhancer of polycomb homolog 1 OS=Homo sapiens GN=EPC1 PE=1 SV=1	2.74183	0.0127484	0.00043753	0.00023658	0.00030095	0.00050442	0.00036987	11	7	8	13	9.75	9.6265e-05	0.00011437	0.00011414	0.00021482	0.000134899	3	4	4	7	4.5
KMT2B	Histone-lysine N-methyltransferase 2B OS=Homo sapiens GN=KMT2B PE=1 SV=1	2.68028	0.0732133	9.7981e-05	0	4.6335e-05	8.3634e-05	7.59833e-05	9	0	4	8	7	0	0	0	2.8349e-05	2.8349e-05	0	0	0	3	3
ICE1	Little elongation complex subunit 1 OS=Homo sapiens GN=ICE1 PE=1 SV=5	2.61678	0.00517991	0.00052828	0.00027432	0.00043025	0.00042946	0.000415577	36	22	31	30	29.75	8.2869e-05	0.00018988	0.00014738	0.00021512	0.000158812	7	18	14	19	14.5
KIF20B	Kinesin-like protein KIF20B OS=Homo sapiens GN=KIF20B PE=1 SV=3	2.60884	0.00219917	0.00038368	0.00031049	0.00031104	0.00030299	0.00032705	21	20	18	17	19	0.00022109	7.8805e-05	0.00013107	7.0483e-05	0.000125362	15	6	10	5	9
RBM4	RNA-binding protein 4 OS=Homo sapiens GN=RBM4 PE=1 SV=1	2.60651	0.000352017	0.0013703	0.00093148	0.001296	0.0012476	0.00121134	15	12	15	14	14	0.00044218	0.0004597	0.00039321	0.00056386	0.000464738	6	7	6	8	6.75
PHIP	PH-interacting protein OS=Homo sapiens GN=PHIP PE=1 SV=2	2.60046	0.586544	0	0.00051203	0	0	0.00051203	0	35	0	0	35	0	0.0001969	0	0	0.0001969	0	16	0	0	16
ZNF609	Zinc finger protein 609 OS=Homo sapiens GN=ZNF609 PE=1 SV=2	2.57781	0.56563	9.4266e-05	0	0.00017831	0	0.000136288	4	0	8	0	6	0	3.3883e-05	3.3813e-05	9.0913e-05	5.28697e-05	0	2	2	5	3
EPC2	Enhancer of polycomb homolog 2 OS=Homo sapiens GN=EPC2 PE=1 SV=2	2.57559	0.0120232	0.00032964	0.00014005	0.00023383	0.00024118	0.000236175	8	4	6	6	6	0	5.9242e-05	8.868e-05	0.00012717	9.16973e-05	0	2	3	4	3
ASXL2	Putative Polycomb group protein ASXL2 OS=Homo sapiens GN=ASXL2 PE=1 SV=1	2.57043	0.00586252	0.00011586	7.876e-05	0.00015341	0.00020344	0.000137868	5	4	7	9	6.25	0	0	0	5.3636e-05	5.3636e-05	0	0	0	3	3
PRRC2B	Protein PRRC2B OS=Homo sapiens GN=PRRC2B PE=1 SV=2	2.56706	0.0154165	0.00041771	0.00027887	0.00053616	0.0005239	0.00043916	29	22	38	37	31.5	2.407e-05	0.00016086	0.00024615	0.00025322	0.000171075	3	17	26	23	17.25
SDCCAG3	Serologically defined colon cancer antigen 3 OS=Homo sapiens GN=SDCCAG3 PE=1 SV=3	2.53088	0.018032	0.001376	0.00051963	0.00093988	0.00096942	0.000951233	18	8	13	13	13	0.00043168	0.00038467	0.0002742	0.00041285	0.00037585	7	7	5	7	6.5
BCORL1	BCL-6 corepressor-like protein 1 OS=Homo sapiens GN=BCORL1 PE=1 SV=1	2.52519	0.00202139	7.7738e-05	6.6055e-05	9.1905e-05	5.6876e-05	7.31435e-05	4	4	5	3	4	0	2.7942e-05	0	2.9989e-05	2.89655e-05	0	2	0	2	2
SNU13	NHP2-like protein 1 OS=Homo sapiens GN=SNU13 PE=1 SV=3	2.52295	0.217582	0	0.00066223	0.0004914	0.001774	0.000975877	0	3	2	7	4	0	0	0.00037273	0.00040087	0.0003868	0	0	2	2	2
PLEC	Plectin OS=Homo sapiens GN=PLEC PE=1 SV=3	2.45471	0.16523	0.00019168	0.0012125	0.00074529	0.00056095	0.000677605	27	201	111	81	105	0.00016036	0.00069406	0.00010186	0.00014789	0.000276043	28	136	20	27	52.75
ZBTB33	Transcriptional regulator Kaiso OS=Homo sapiens GN=ZBTB33 PE=1 SV=2	2.4532	0.0379191	0.00054431	0.00046251	0.0002808	0.00024136	0.000382245	11	11	6	5	8.25	7.9839e-05	0.00010672	0.00028399	0.00015271	0.000155815	2	3	8	4	4.25
HIST1H2BL	Histone H2B type 1-L OS=Homo sapiens GN=HIST1H2BL PE=1 SV=3	2.44311	0.108115	0.0076533	0.016818	0.0047424	0.0066936	0.00897683	29	75	19	26	37.25	0.0046839	0.0055018	0.0022719	0.0022398	0.00367435	22	29	12	11	18.5
RCL1	RNA 3'-terminal phosphate cyclase-like protein OS=Homo sapiens GN=RCL1 PE=1 SV=3	2.43893	0.564732	0	0.0004545	0	0	0.0004545	0	6	0	0	6	0.00028768	0.00019226	0.00012791	0.00013756	0.000186352	4	3	2	2	2.75
SNRPD2	Small nuclear ribonucleoprotein Sm D2 OS=Homo sapiens GN=SNRPD2 PE=1 SV=1	2.41381	0.252467	0.0011272	0	0	0.0008247	0.00097595	4	0	0	3	3.5	0	0	0.00040432	0	0.00040432	0	0	2	0	2
RPRD2	Regulation of nuclear pre-mRNA domain-containing protein 2 OS=Homo sapiens GN=RPRD2 PE=1 SV=1	2.39927	0.0011393	0.000569	0.00052217	0.00058121	0.00062168	0.000573515	25	27	27	28	26.75	0.00012853	0.0002127	0.00022859	0.00038633	0.000239038	7	13	14	22	14
HIST1H4A	Histone H4 OS=Homo sapiens GN=HIST1H4A PE=1 SV=2	2.39209	0.205327	0.0064568	0.018379	0.002748	0.0091331	0.00917922	20	67	9	29	31.25	0.0036462	0.008819	0.0013896	0.0014945	0.00383732	14	38	6	6	16
PLRG1	Pleiotropic regulator 1 OS=Homo sapiens GN=PLRG1 PE=1 SV=1	2.36484	0.00311686	0.00032347	0.00043977	0.0004283	0.00044177	0.000408328	5	8	7	7	6.75	0	0.00023253	0.00018564	9.9828e-05	0.000172666	0	5	4	2	3.66667
DDX56	Probable ATP-dependent RNA helicase DDX56 OS=Homo sapiens GN=DDX56 PE=1 SV=1	2.36405	0.614224	0	0.00020662	0	0	0.00020662	0	4	0	0	4	0	8.7401e-05	0	0	8.7401e-05	0	2	0	0	2
HEATR1	HEAT repeat-containing protein 1 OS=Homo sapiens GN=HEATR1 PE=1 SV=3	2.3639	0.457505	6.2038e-05	0.00046125	0	7.5649e-05	0.000199646	4	35	0	5	14.6667	7.5072e-05	0.00013379	4.4506e-05	0	8.4456e-05	6	12	4	0	7.33333
RING1	E3 ubiquitin-protein ligase RING1 OS=Homo sapiens GN=RING1 PE=1 SV=2	2.35766	0.00146443	0.00040951	0.00041756	0.00046477	0.00039948	0.00042283	7	9	10	7	8.25	0	0.00017663	0.00023502	0.00012638	0.000179343	0	7	8	4	6.33333
GLO1	Lactoylglutathione lyase OS=Homo sapiens GN=GLO1 PE=1 SV=4	2.35416	0.0194979	0.0010843	0.00061424	0.0011965	0.0015866	0.00112041	6	4	7	9	6.5	0.00043738	0.00051966	0.00038894	0.00055773	0.000475928	3	4	3	4	3.5
CUX1	Homeobox protein cut-like 1 OS=Homo sapiens GN=CUX1 PE=1 SV=3	2.33551	0.00167516	0.0011489	0.00073219	0.001003	0.0011423	0.0010066	52	39	48	53	48	0.00051691	0.00031766	0.00041211	0.00047731	0.000430997	29	20	26	28	25.75
ESRRA	Steroid hormone receptor ERR1 OS=Homo sapiens GN=ESRRA PE=1 SV=3	2.32874	0.000878924	0.00023583	0.00026719	0.00037175	0.00030674	0.000295377	4	5	6	5	5	0.00012684	0	0	0	0.00012684	3	0	0	0	3
H2AFY	Core histone macro-H2A.1 OS=Homo sapiens GN=H2AFY PE=1 SV=4	2.32064	0.17343	0.0019665	0.0041015	0.00067634	0.0018312	0.00214389	22	54	8	21	26.25	0.0012259	0.001735	0.00032063	0.0004138	0.000923833	17	27	5	6	13.75
POM121C	Nuclear envelope pore membrane protein POM 121C OS=Homo sapiens GN=POM121C PE=1 SV=2	2.31764	0.00546696	0.00018939	0.00013794	0.00012795	0.00015836	0.00015341	7	6	5	6	6	0	3.89e-05	9.7051e-05	6.2626e-05	6.61923e-05	0	2	5	3	3.33333
GNG12	Guanine nucleotide-binding protein G(I)/G(S)/G(O) subunit gamma-12 OS=Homo sapiens GN=GNG12 PE=1 SV=3	2.31025	0.174089	0	0.0015697	0.0013104	0.0031537	0.00201127	0	4	3	7	4.66667	0.00074516	0.00099601	0	0	0.000870585	2	3	0	0	2.5
CLSPN	Claspin OS=Homo sapiens GN=CLSPN PE=1 SV=3	2.29638	0.0112875	0.00037251	0.00023212	0.00046975	0.00031493	0.000347327	15	11	20	13	14.75	0	0.00014282	0.00019597	0.00011496	0.00015125	0	8	11	6	8.33333
POLR3C	DNA-directed RNA polymerase III subunit RPC3 OS=Homo sapiens GN=POLR3C PE=1 SV=1	2.29456	0.00935224	0.00037362	0.00026456	0.00029447	0.00048597	0.000354655	6	5	5	8	6	0.00015071	0.00013429	0.00017869	0	0.000154563	3	3	4	0	3.33333
DNAJB6	DnaJ homolog subfamily B member 6 OS=Homo sapiens GN=DNAJB6 PE=1 SV=2	2.29242	0.0169179	0.00061201	0.00034669	0.00028941	0.00049752	0.000436407	6	4	3	5	4.5	0.00016458	0.00021998	0.00021952	0.0001574	0.00019037	2	3	3	2	2.5
KMT2C	Histone-lysine N-methyltransferase 2C OS=Homo sapiens GN=KMT2C PE=1 SV=3	2.28896	0.0266396	0.00015573	9.7808e-05	0.00012808	0.00011229	0.000123477	23	17	20	17	19.25	3.2774e-05	3.4072e-05	3.4002e-05	0.00011493	5.39445e-05	6	7	7	22	10.5
SLC16A1	Monocarboxylate transporter 1 OS=Homo sapiens GN=SLC16A1 PE=1 SV=3	2.27785	0.000624443	0.00053204	0.0005651	0.00075479	0.00064876	0.000625172	8	10	12	10	10	0.00026826	0.00023904	0.00033397	0.00025656	0.000274458	5	5	7	5	5.5
ABCE1	ATP-binding cassette sub-family E member 1 OS=Homo sapiens GN=ABCE1 PE=1 SV=1	2.27598	0.00062307	0.00099924	0.00075472	0.00073505	0.00092062	0.000852407	18	16	14	17	16.25	0.00035828	0.00031926	0.0004779	0.00034265	0.000374523	8	8	12	8	9
INA	Alpha-internexin OS=Homo sapiens GN=INA PE=1 SV=2	2.27209	0.189973	0.00059974	0.0020384	0.0010084	0.0012351	0.00122041	10	37	17	20	21	0.00021504	0.0015808	9.5611e-05	0.00025707	0.00053713	5	35	3	6	12.25
MCM3AP	Germinal-center associated nuclear protein OS=Homo sapiens GN=MCM3AP PE=1 SV=2	2.25945	0.0117342	0.0002855	0.00017124	0.00020649	0.00021298	0.000219052	17	12	13	13	13.75	5.4194e-05	6.0364e-05	0.00015662	0.00011662	9.69495e-05	4	5	13	9	7.75
ACTR3	Actin-related protein 3 OS=Homo sapiens GN=ACTR3 PE=1 SV=3	2.24249	0.28786	0.0001591	0.00054077	0.00037619	0	0.000358687	2	8	5	0	5	0.00012835	0.00022875	0	0.00012275	0.00015995	2	4	0	2	2.66667
RPF2	Ribosome production factor 2 homolog OS=Homo sapiens GN=RPF2 PE=1 SV=2	2.23955	0.726127	0	0.0014774	0	0.00021201	0.000844705	0	16	0	2	9	0.00035066	0.00062495	0.00015592	0	0.000377177	4	8	2	0	4.66667
HIRA	Protein HIRA OS=Homo sapiens GN=HIRA PE=1 SV=2	2.23647	0.00136683	0.0009482	0.00075013	0.00095865	0.00066981	0.000831698	29	27	31	21	27	0.00026377	0.00044659	0.00039876	0.0003784	0.00037188	10	19	17	15	15.25
KAT5	Histone acetyltransferase KAT5 OS=Homo sapiens GN=KAT5 PE=1 SV=2	2.22912	0.0100443	0.00064819	0.00038555	0.00055175	0.00056909	0.000538645	10	7	9	9	8.75	0.00010458	0.00018639	0.00032551	0.00035008	0.00024164	2	4	7	7	5
HMGA2	High mobility group protein HMGI-C OS=Homo sapiens GN=HMGA2 PE=1 SV=1	2.2279	0.930639	0	0.0010369	0	0	0.0010369	0	4	0	0	4	0.00049222	0.00043861	0	0	0.000465415	2	2	0	0	2
RNF169	E3 ubiquitin-protein ligase RNF169 OS=Homo sapiens GN=RNF169 PE=1 SV=2	2.20303	0.0936983	0.00018787	7.9816e-05	0.00017768	0	0.000148455	4	2	4	0	3.33333	0	0	6.7387e-05	0	6.7387e-05	0	0	2	0	2
ZNF384	Zinc finger protein 384 OS=Homo sapiens GN=ZNF384 PE=1 SV=2	2.2008	0.211457	0.00017289	0.00048969	0	0.00022487	0.000295817	3	10	0	4	5.66667	0.00018597	8.2857e-05	0	0	0.000134414	4	2	0	0	3
LMNA	Prelamin-A/C OS=Homo sapiens GN=LMNA PE=1 SV=1	2.18067	0.00870281	0.00035055	0.00034042	0.00018946	0.00029312	0.000293387	7	8	5	7	6.75	0	0.000144	0.00014371	0.00011591	0.00013454	0	7	4	4	5
SPAG7	Sperm-associated antigen 7 OS=Homo sapiens GN=SPAG7 PE=1 SV=2	2.1801	0.137947	0.00043946	0	0.00069273	0.0007145	0.000615563	3	0	5	5	4.33333	0.00035453	0	0.00021018	0	0.000282355	3	0	2	0	2.5
HNRNPD	Heterogeneous nuclear ribonucleoprotein D0 OS=Homo sapiens GN=HNRNPD PE=1 SV=1	2.16306	0.00674578	0.00046834	0.00063673	0.00062014	0.00045688	0.000545523	9	11	9	8	9.25	0.00015113	0.00033668	0.00026879	0	0.0002522	6	7	8	0	7
PPIL1	Peptidyl-prolyl cis-trans isomerase-like 1 OS=Homo sapiens GN=PPIL1 PE=1 SV=1	2.15794	0.0722294	0	0.00051063	0.00056837	0.00078164	0.000620213	0	3	3	4	3.33333	0	0	0.00028741	0	0.00028741	0	0	2	0	2
QSER1	Glutamine and serine-rich protein 1 OS=Homo sapiens GN=QSER1 PE=1 SV=3	2.13608	0.0340441	0.00015332	3.2571e-05	0.00012689	0.00011218	0.00010624	8	2	7	6	5.75	0	5.5111e-05	0	4.4361e-05	4.9736e-05	0	4	0	3	3.5
BMS1	Ribosome biogenesis protein BMS1 homolog OS=Homo sapiens GN=BMS1 PE=1 SV=1	2.1209	0.448071	0	0.00019836	0	0	0.00019836	0	9	0	0	9	0.00014648	5.5938e-05	0.00011165	6.0037e-05	9.35263e-05	7	3	6	3	4.75
USP11	Ubiquitin carboxyl-terminal hydrolase 11 OS=Homo sapiens GN=USP11 PE=1 SV=3	2.11882	0.0173876	0.00020718	0.0001467	0.00026126	0.00016842	0.00019589	6	5	8	5	6	0.00013928	4.9645e-05	7.4315e-05	0.00010657	9.24525e-05	5	2	3	4	3.5
ZNF106	Zinc finger protein 106 OS=Homo sapiens GN=ZNF106 PE=1 SV=1	2.10623	0.0166612	0.00024723	0.00030011	0.00028393	0.0001895	0.000255193	14	20	17	11	15.5	2.8493e-05	0.00015234	0.00012669	0.00017712	0.000121161	2	12	10	13	9.25
GCFC2	GC-rich sequence DNA-binding factor 2 OS=Homo sapiens GN=GCFC2 PE=1 SV=2	2.10368	0.0311677	0.00021288	0.00014471	8.0537e-05	0.00016614	0.000151067	5	4	2	4	3.75	6.8696e-05	6.1214e-05	9.1633e-05	6.57e-05	7.18107e-05	2	2	3	2	2.25
HADHA	Trifunctional enzyme subunit alpha, mitochondrial OS=Homo sapiens GN=HADHA PE=1 SV=2	2.10294	0.00580296	0.00017432	0.00022219	0.00012366	0.00017006	0.000172557	4	6	3	4	4.25	7.0317e-05	0	9.3794e-05	0	8.20555e-05	2	0	3	0	2.5
MATR3	Matrin-3 OS=Homo sapiens GN=MATR3 PE=1 SV=2	2.09677	7.67559e-05	0.00070666	0.00060046	0.00070548	0.00076595	0.000694638	18	18	19	20	18.75	0.00028504	0.00033867	0.00033797	0.00036348	0.00033129	9	12	12	12	11.25
BRPF1	Peregrin OS=Homo sapiens GN=BRPF1 PE=1 SV=2	2.09537	0.0111744	0.0006026	0.00060513	0.00062174	0.00085504	0.000671128	22	26	24	32	26	0.00048614	0.00023629	0.0001572	0.00040153	0.00032029	22	12	8	19	15.25
EP400	E1A-binding protein p400 OS=Homo sapiens GN=EP400 PE=1 SV=4	2.09472	0.000581926	0.00061052	0.00053666	0.00054756	0.00066745	0.000590548	58	60	55	65	59.5	0.00019531	0.00026485	0.00030206	0.00036547	0.000281923	23	35	40	45	35.75
CLK3	Dual specificity protein kinase CLK3 OS=Homo sapiens GN=CLK3 PE=1 SV=3	2.09442	0.178453	0.00031272	0.00013286	0	0.00020337	0.000216317	6	3	0	4	4.33333	0.00012614	0	0	8.0425e-05	0.000103283	3	0	0	2	2.5
ACTR2	Actin-related protein 2 OS=Homo sapiens GN=ACTR2 PE=1 SV=1	2.09209	0.309621	0.00016879	0.00014343	0.00063857	0	0.00031693	2	2	8	0	4	0	0.00012134	0.00018164	0	0.00015149	0	2	3	0	2.5
SLTM	SAFB-like transcription modulator OS=Homo sapiens GN=SLTM PE=1 SV=2	2.09172	0.0020783	0.00012864	0.00016396	0.00015208	0.00015686	0.000150385	4	6	5	5	5	0	6.9355e-05	0	7.4436e-05	7.18955e-05	0	3	0	3	3
SEC13	Protein SEC13 homolog OS=Homo sapiens GN=SEC13 PE=1 SV=3	2.0913	0.0202759	0.00072288	0.00052649	0.0009767	0.00060444	0.000707628	7	6	10	6	7.25	0.00016662	0	0.00037042	0.00047806	0.000338367	2	0	5	6	4.33333
SFSWAP	Splicing factor, suppressor of white-apricot homolog OS=Homo sapiens GN=SFSWAP PE=1 SV=3	2.08834	0.171448	0.00013986	8.9132e-05	0.00013228	0.0003411	0.000175593	4	3	4	10	5.25	5.6416e-05	0.00010054	0.00012542	5.3955e-05	8.40827e-05	2	4	5	2	3.25
KIF1B	Kinesin-like protein KIF1B OS=Homo sapiens GN=KIF1B PE=1 SV=5	2.07832	0.011064	0.00025635	0.00023338	0.00029441	0.00016076	0.000236225	14	15	17	9	13.75	0.00011818	6.5816e-05	0.00015763	0.00011302	0.000113661	8	5	12	8	8.25
MYO1D	Unconventional myosin-Id OS=Homo sapiens GN=MYO1D PE=1 SV=2	2.07799	0.0384421	0.00039665	0.00078642	0.00059398	0.00054816	0.000581303	12	28	19	17	19	0.00034666	0.00047523	0.00011856	0.00017852	0.000279742	13	20	5	7	11.25
KRT9	Keratin, type I cytoskeletal 9 OS=Homo sapiens GN=KRT9 PE=1 SV=3	2.07442	0.00222149	0.0061381	0.0040818	0.0051491	0.0064043	0.00544333	115	90	102	123	107.5	0.0027988	0.0021487	0.0028718	0.0026768	0.00262403	65	56	75	65	65.25
TLE3	Transducin-like enhancer protein 3 OS=Homo sapiens GN=TLE3 PE=1 SV=2	2.07407	0.099525	0.00017229	7.3199e-05	0	0.00016807	0.000137853	4	2	0	4	3.33333	0	0	0	6.6465e-05	6.6465e-05	0	0	0	2	2
PHB	Prohibitin OS=Homo sapiens GN=PHB PE=1 SV=1	2.06597	0.000296599	0.0017115	0.0014543	0.0015031	0.0017889	0.00161445	14	14	13	15	14	0.00069037	0.00061518	0.00087702	0.00094322	0.000781447	7	7	10	10	8.5
CPNE8	Copine-8 OS=Homo sapiens GN=CPNE8 PE=1 SV=2	2.05156	0.0979381	0.00082541	0.0014027	0.0012268	0.00086272	0.00107941	14	28	22	15	19.75	0.00047564	0.0012291	0.00012689	0.00027293	0.00052614	10	29	3	6	12
ZNF451	E3 SUMO-protein ligase ZNF451 OS=Homo sapiens GN=ZNF451 PE=1 SV=2	2.03972	0.663281	0	0	0	9.172e-05	9.172e-05	0	0	0	3	3	0	0	4.4967e-05	0	4.4967e-05	0	0	2	0	2
KIF1A	Kinesin-like protein KIF1A OS=Homo sapiens GN=KIF1A PE=1 SV=2	2.03971	0.663283	0	0	0	5.7583e-05	5.7583e-05	0	0	0	6	6	0	0	2.8231e-05	0	2.8231e-05	0	0	7	0	7
NBN	Nibrin OS=Homo sapiens GN=NBN PE=1 SV=1	2.03129	0.00696225	0.0038809	0.0028855	0.0040459	0.003958	0.00369258	88	77	97	92	88.5	0.0012097	0.0016169	0.0015186	0.0029262	0.00181785	34	51	48	86	54.75
MRPS5	28S ribosomal protein S5, mitochondrial OS=Homo sapiens GN=MRPS5 PE=1 SV=2	2.02861	0.0273165	0.00038665	0.00019713	0.00014628	0.00022631	0.000239093	5	3	2	3	3.25	0.00012477	0	0.00011095	0	0.00011786	2	0	2	0	2
ZNF326	DBIRD complex subunit ZNF326 OS=Homo sapiens GN=ZNF326 PE=1 SV=2	2.02832	0.00638369	0.0015426	0.00087387	0.0011348	0.0013377	0.00122224	27	18	21	24	22.5	0.00055311	0.00057502	0.00053284	0.00074939	0.00060259	12	14	13	17	14
ARID1A	AT-rich interactive domain-containing protein 1A OS=Homo sapiens GN=ARID1A PE=1 SV=3	2.02632	0.138779	0.00016008	2.4731e-05	0.00011011	9.9373e-05	9.85735e-05	11	2	8	7	7	2.348e-05	6.2768e-05	5.2199e-05	5.6139e-05	4.86465e-05	2	6	5	5	4.5
ZNF318	Zinc finger protein 318 OS=Homo sapiens GN=ZNF318 PE=1 SV=2	2.0258	0.0308093	0.00072954	0.00043393	0.00082799	0.00066898	0.00066511	50	35	60	47	48	9.4167e-05	0.00036711	0.00034542	0.00050658	0.000328319	8	35	33	45	30.25
PCCA	Propionyl-CoA carboxylase alpha chain, mitochondrial OS=Homo sapiens GN=PCCA PE=1 SV=4	2.02309	0.000469908	0.011282	0.010596	0.0090288	0.0087779	0.00992118	247	273	209	197	231.5	0.0053799	0.0047283	0.0038338	0.0056739	0.00490398	146	144	117	161	142
DHFR	Dihydrofolate reductase OS=Homo sapiens GN=DHFR PE=1 SV=2	2.01633	0.0502245	0.0008891	0.00045329	0.0008409	0.00034693	0.000632555	5	3	5	2	3.75	0.00043036	0.00025566	0.00025513	0	0.000313717	3	2	2	0	2.33333
TP53BP1	TP53-binding protein 1 OS=Homo sapiens GN=TP53BP1 PE=1 SV=2	2.01512	0.404296	0	0.00020059	4.7844e-05	8.2247e-05	0.000110227	0	14	3	5	7.33333	2.7207e-05	8.4853e-05	0	5.204e-05	5.47e-05	2	7	0	4	4.33333
RPA2	Replication protein A 32 kDa subunit OS=Homo sapiens GN=RPA2 PE=1 SV=1	2.00432	0.00607942	0.00036947	0.00041859	0.0005824	0.00048057	0.000462758	3	4	5	4	4	0	0	0.0001767	0.00028506	0.00023088	0	0	2	3	2.5
ERH	Enhancer of rudimentary homolog OS=Homo sapiens GN=ERH PE=1 SV=1	2.00192	0.182221	0.0012789	0.00054337	0	0.00093572	0.00091933	4	2	0	3	3	0	0.0004597	0.00045875	0	0.000459225	0	2	2	0	2
NCOA2	Nuclear receptor coactivator 2 OS=Homo sapiens GN=NCOA2 PE=1 SV=2	1.99805	0.714965	9.0853e-05	0	6.4446e-05	0	7.76495e-05	4	0	3	0	3.5	0	3.2656e-05	4.8883e-05	3.5049e-05	3.88627e-05	0	2	3	2	2.33333
EIF6	Eukaryotic translation initiation factor 6 OS=Homo sapiens GN=EIF6 PE=1 SV=1	1.99217	0.995478	0	0.00092261	0	0.0003972	0.000659905	0	8	0	3	5.5	0.00032848	0.00039027	0.0002921	0.00031415	0.00033125	3	4	3	3	3.25
AKAP8L	A-kinase anchor protein 8-like OS=Homo sapiens GN=AKAP8L PE=1 SV=3	1.99194	0.00137085	0.00025737	0.00021869	0.00019474	0.00025107	0.000230467	5	5	4	5	4.75	0.00012458	0.00014801	0.00011078	7.9429e-05	0.0001157	3	4	3	2	3
TRA2A	Transformer-2 protein homolog alpha OS=Homo sapiens GN=TRA2A PE=1 SV=1	1.98952	0.0171018	0.00047166	0.00040078	0.00033457	0.00023006	0.000359267	5	4	3	2	3.5	0.00019025	0.00016953	0	0.00018196	0.00018058	3	3	0	3	3
ATP6V1H	V-type proton ATPase subunit H OS=Homo sapiens GN=ATP6V1H PE=1 SV=1	1.98835	0.665566	0	0	0	0.00020148	0.00020148	0	0	0	3	3	0	9.8982e-05	9.8779e-05	0.00010623	0.00010133	0	2	2	2	2
ANKFY1	Rabankyrin-5 OS=Homo sapiens GN=ANKFY1 PE=1 SV=2	1.97753	0.674573	0	0	8.0709e-05	0	8.0709e-05	0	0	3	0	3	0	0	4.0813e-05	0	4.0813e-05	0	0	2	0	2
TBL1XR1	F-box-like/WD repeat-containing protein TBL1XR1 OS=Homo sapiens GN=TBL1XR1 PE=1 SV=1	1.96869	0.017299	0.0022643	0.0013743	0.0020803	0.0015777	0.00182415	35	25	34	25	29.75	0.00041752	0.0011627	0.00092821	0.0011979	0.000926582	8	25	20	24	19.25
RPL29	60S ribosomal protein L29 OS=Homo sapiens GN=RPL29 PE=1 SV=2	1.95895	0.0532884	0.0012548	0.00053311	0.00098899	0.00061204	0.000847235	6	3	5	3	4.25	0.00050615	0.00045102	0.0004501	0.00032271	0.000432495	3	3	3	2	2.75
KRT5	Keratin, type II cytoskeletal 5 OS=Homo sapiens GN=KRT5 PE=1 SV=3	1.95236	0.175585	0.0014654	0.00038312	0.0015458	0.0013195	0.00117846	42	21	45	44	38	0.00045468	0.00032413	0.0013747	0.00026091	0.000603605	19	15	53	11	24.5
PPP4R3A	Serine/threonine-protein phosphatase 4 regulatory subunit 3A OS=Homo sapiens GN=PPP4R3A PE=1 SV=1	1.9516	0.00134392	0.00023951	0.00020352	0.00022653	0.00027259	0.000235537	6	6	6	7	6.25	0.00016102	0.00011479	0.00011455	9.2397e-05	0.000120689	5	4	4	3	4
USP54	Inactive ubiquitin carboxyl-terminal hydrolase 54 OS=Homo sapiens GN=USP54 PE=1 SV=4	1.94414	0.680935	5.9238e-05	0	0	0	5.9238e-05	3	0	0	0	3	0	0	0	3.047e-05	3.047e-05	0	0	0	2	2
DVL1	Segment polarity protein dishevelled homolog DVL-1 OS=Homo sapiens GN=DVL1 PE=1 SV=2	1.94045	0.000231332	0.0013875	0.0013823	0.0015385	0.0016336	0.00148547	36	37	40	41	38.5	0.00073337	0.00058471	0.00085809	0.00088595	0.00076553	21	21	31	27	25
TPX2	Targeting protein for Xklp2 OS=Homo sapiens GN=TPX2 PE=1 SV=2	1.93924	0.00365083	0.00071223	0.00052954	0.00067362	0.00065137	0.00064169	16	14	16	15	15.25	0.00021547	0.00032	0.00047902	0.0003091	0.000330897	6	10	15	9	10
RBM27	RNA-binding protein 27 OS=Homo sapiens GN=RBM27 PE=1 SV=2	1.93806	0.00665458	0.0018195	0.0014127	0.0017505	0.0017137	0.0016741	58	53	59	56	56.5	0.0003543	0.0009697	0.0009452	0.001186	0.0008638	14	43	42	49	37
KRT19	Keratin, type I cytoskeletal 19 OS=Homo sapiens GN=KRT19 PE=1 SV=4	1.93389	0.0598754	0.0025771	0.0032493	0.002516	0.0023518	0.00267355	38	52	43	35	42	0.001006	0.0029283	0.0009542	0.00064139	0.00138247	19	55	21	14	27.25
RALY	RNA-binding protein Raly OS=Homo sapiens GN=RALY PE=1 SV=1	1.92857	0.19826	0.00054334	0.00092337	0	0.00042403	0.000630247	5	10	0	4	6.33333	0.000263	0.00039059	0	0	0.000326795	3	5	0	0	4
FLOT2	Flotillin-2 OS=Homo sapiens GN=FLOT2 PE=1 SV=2	1.92691	0.159413	0.00046615	0.00072618	0.0010287	0.0013642	0.000896308	6	11	14	18	12.25	0.0005641	0.00094947	0.00016721	0.00017983	0.000465153	9	17	3	3	8
UBN2	Ubinuclein-2 OS=Homo sapiens GN=UBN2 PE=1 SV=2	1.92486	0.0264663	0.00022218	0.00014683	0.00016344	0.0002649	0.000199338	9	7	7	11	8.5	0	0.00012422	5.3129e-05	0.00013333	0.00010356	0	7	3	7	5.66667
NOP10	H/ACA ribonucleoprotein complex subunit 3 OS=Homo sapiens GN=NOP10 PE=1 SV=1	1.92236	0.020946	0.0031174	0.0017659	0.0029484	0.0035479	0.0028449	6	4	6	7	5.75	0.0016766	0.0011205	0.0011182	0.0020043	0.0014799	4	3	3	5	3.75
DMAP1	DNA methyltransferase 1-associated protein 1 OS=Homo sapiens GN=DMAP1 PE=1 SV=1	1.91497	0.00463684	0.00085445	0.0010286	0.00080813	0.00090299	0.000898542	12	17	12	13	13.5	0.00034466	0.00035831	0.00045973	0.00071418	0.00046922	6	7	9	13	8.75
SRRT	Serrate RNA effector molecule homolog OS=Homo sapiens GN=SRRT PE=1 SV=1	1.91241	0.323186	7.5919e-05	0	0	0.00014812	0.00011202	2	0	0	4	3	0	0	0	5.8575e-05	5.8575e-05	0	0	0	2	2
PCNP	PEST proteolytic signal-containing nuclear protein OS=Homo sapiens GN=PCNP PE=1 SV=2	1.90938	0.00132273	0.0016813	0.0012699	0.0017668	0.0014579	0.00154397	9	8	10	8	8.75	0.00090424	0.00067147	0.00093812	0.00072067	0.000808625	6	5	7	5	5.75
SLC25A13	Calcium-binding mitochondrial carrier protein Aralar2 OS=Homo sapiens GN=SLC25A13 PE=1 SV=2	1.90904	0.0123633	0.00064042	0.00041859	0.00041933	0.00057668	0.000513755	13	10	9	12	11	0.00031794	0.00017707	0.00035341	0.00022805	0.000269118	8	5	10	6	7.25
CBX5	Chromobox protein homolog 5 OS=Homo sapiens GN=CBX5 PE=1 SV=1	1.89726	0.353076	0	0.00073966	0	0	0.00073966	0	5	0	0	5	0.0002809	0.00062577	0.00024979	0.00040297	0.000389858	2	5	4	3	3.5
CHD7	Chromodomain-helicase-DNA-binding protein 7 OS=Homo sapiens GN=CHD7 PE=1 SV=3	1.89696	0.0150532	6.6571e-05	1.8856e-05	5.2469e-05	4.3294e-05	4.52975e-05	10	6	10	6	8	0	0	2.3879e-05	0	2.3879e-05	0	0	6	0	6
KNL1	Kinetochore scaffold 1 OS=Homo sapiens GN=KNL1 PE=1 SV=3	1.89638	0.011014	0.0013204	0.00089277	0.0015443	0.0013712	0.00128217	93	74	115	99	95.25	0.00041235	0.00070427	0.00073337	0.00085446	0.000676113	36	69	72	78	63.75
PRPF38A	Pre-mRNA-splicing factor 38A OS=Homo sapiens GN=PRPF38A PE=1 SV=1	1.89456	0.634394	0	0.0004528	0	0	0.0004528	0	5	0	0	5	0.00025794	0.00015323	0.00030583	0	0.000239	3	2	4	0	3
SNAP23	Synaptosomal-associated protein 23 OS=Homo sapiens GN=SNAP23 PE=1 SV=1	1.88851	0.156257	0.00047278	0.00093737	0.0011924	0.0013836	0.000996537	3	7	8	9	6.75	0.00050855	0.0011329	0.00022611	0.00024318	0.000527685	4	10	2	2	4.5
SLU7	Pre-mRNA-splicing factor SLU7 OS=Homo sapiens GN=SLU7 PE=1 SV=2	1.88792	0.0223697	0.00039721	9.6433e-05	0.00032201	0.00022142	0.000259268	7	2	6	4	4.75	0.00013733	0	0	0	0.00013733	3	0	0	0	3
DIS3	Exosome complex exonuclease RRP44 OS=Homo sapiens GN=DIS3 PE=1 SV=2	1.88662	0.00664768	0.00020826	0.00017696	0.0002298	0.00027088	0.000221475	6	6	7	8	6.75	0.00014001	9.9809e-05	0.00014941	8.0341e-05	0.000117392	5	4	6	3	4.5
CLINT1	Clathrin interactor 1 OS=Homo sapiens GN=CLINT1 PE=1 SV=1	1.87905	0.00602039	0.00074485	0.00045208	0.00070447	0.00072662	0.000657005	14	10	14	14	13	0.00030045	0.00030597	0.00038168	0.00041049	0.000349647	7	8	10	10	8.75
CAPZA1	F-actin-capping protein subunit alpha-1 OS=Homo sapiens GN=CAPZA1 PE=1 SV=3	1.87163	0.000952722	0.0022091	0.0019759	0.0017594	0.0015879	0.00188307	19	20	16	14	17.25	0.00093797	0.00091939	0.0010009	0.0011662	0.00100612	10	11	12	13	11.5
RRS1	Ribosome biogenesis regulatory protein homolog OS=Homo sapiens GN=RRS1 PE=1 SV=2	1.86844	0.619635	0.0001822	0.00092893	0	0.00044436	0.000518497	2	12	0	5	6.33333	0.00044097	0.00032746	0.00013071	0.00021087	0.000277503	6	5	2	3	4
TFIP11	Tuftelin-interacting protein 11 OS=Homo sapiens GN=TFIP11 PE=1 SV=1	1.86624	0.000287846	0.00095347	0.00087769	0.00078906	0.00096888	0.000897275	24	26	21	25	24	0.0005769	0.00039983	0.00045601	0.00049043	0.000480792	18	14	16	16	16
GTF3C3	General transcription factor 3C polypeptide 3 OS=Homo sapiens GN=GTF3C3 PE=1 SV=1	1.85414	0.0235226	0.00045037	0.00022323	0.00046145	0.00043934	0.000393598	12	7	13	12	11	0.00024222	0.00016188	0.00024232	0.0002027	0.00021228	8	6	9	7	7.5
GTF2I	General transcription factor II-I OS=Homo sapiens GN=GTF2I PE=1 SV=2	1.85407	0.0104238	0.0014327	0.00099091	0.0015756	0.0012026	0.00130045	43	35	50	37	41.25	0.00056447	0.00050299	0.0008127	0.00092546	0.000701405	21	21	34	36	28
KRT2	Keratin, type II cytoskeletal 2 epidermal OS=Homo sapiens GN=KRT2 PE=1 SV=2	1.85193	0.00982628	0.0044232	0.0028299	0.0041342	0.0048226	0.00405247	85	64	84	95	82	0.0023509	0.0017582	0.0028372	0.0018067	0.00218825	56	47	76	45	56
RBM22	Pre-mRNA-splicing factor RBM22 OS=Homo sapiens GN=RBM22 PE=1 SV=1	1.84989	0.198755	0	0.00047092	0.00022464	0.00030893	0.00033483	0	7	3	4	4.66667	0.00019161	0	0.00017039	0	0.000181	3	0	3	0	3
CDK12	Cyclin-dependent kinase 12 OS=Homo sapiens GN=CDK12 PE=1 SV=2	1.84785	0.124768	0.00031244	0.00022756	8.4429e-05	0.00017416	0.000199647	22	21	9	14	16.5	5.4012e-05	0.00012834	0.00011207	0.00013775	0.000108043	8	13	14	12	11.75
MT-CO2	Cytochrome c oxidase subunit 2 OS=Homo sapiens GN=MT-CO2 PE=1 SV=1	1.82981	0.787855	0	0.00037341	0.00041564	0	0.000394525	0	3	3	0	3	0	0.00021061	0.00021018	0.00022604	0.00021561	0	2	2	2	2
CCAR1	Cell division cycle and apoptosis regulator protein 1 OS=Homo sapiens GN=CCAR1 PE=1 SV=2	1.82818	0.0595887	0.00034698	0.0003194	0.00065634	0.00056414	0.000471715	12	13	24	20	17.25	0.00013996	0.00027022	0.0003319	0.00029002	0.000258025	6	13	16	13	12
ZGRF1	Protein ZGRF1 OS=Homo sapiens GN=ZGRF1 PE=1 SV=3	1.81816	0.134359	0.00020546	8.0575e-05	0.00010463	6.167e-05	0.000113084	14	7	8	4	8.25	0	2.2723e-05	9.0704e-05	7.3163e-05	6.21967e-05	0	2	9	6	5.66667
TRRAP	Transformation/transcription domain-associated protein OS=Homo sapiens GN=TRRAP PE=1 SV=3	1.81688	0.0985185	0.0001034	8.7862e-05	8.1497e-05	0.00012609	9.97122e-05	12	12	10	15	12.25	2.0855e-05	1.8583e-05	8.0362e-05	9.9724e-05	5.4881e-05	3	3	13	15	8.5
SLC25A4	ADP/ATP translocase 1 OS=Homo sapiens GN=SLC25A4 PE=1 SV=4	1.81632	0.0884963	0.00033475	0	0.00021107	0.00032656	0.000290793	25	0	29	26	26.6667	0	0	0.0001601	0	0.0001601	0	0	22	0	22
PSMA4	Proteasome subunit alpha type-4 OS=Homo sapiens GN=PSMA4 PE=1 SV=1	1.81558	0.0393489	0.00089182	0.00043303	0.00060249	0.00086999	0.000699332	7	4	5	7	5.75	0.00051391	0.00036635	0.00036559	0.00029489	0.000385185	5	4	4	3	4
SLC25A10	Mitochondrial dicarboxylate carrier OS=Homo sapiens GN=SLC25A10 PE=1 SV=2	1.81383	0.0461958	0.0012745	0.00068915	0.00065749	0.0010172	0.000909585	11	7	6	9	8.25	0.00056082	0.00033316	0.00066495	0.00044696	0.000501473	6	4	8	5	5.75
MRGBP	MRG/MORF4L-binding protein OS=Homo sapiens GN=MRGBP PE=1 SV=1	1.80573	0.0391134	0.00097801	0.00083103	0.00061666	0.00047703	0.000725683	6	6	4	3	4.75	0	0.00046871	0.00023387	0.00050305	0.000401877	0	4	2	4	3.33333
NHP2	H/ACA ribonucleoprotein complex subunit 2 OS=Homo sapiens GN=NHP2 PE=1 SV=1	1.8034	0.0432215	0.001956	0.0014774	0.0020555	0.0025442	0.00200827	9	8	10	12	9.75	0.0012273	0.0014061	0.00031183	0.0015092	0.00111361	7	9	2	9	6.75
RBSN	Rabenosyn-5 OS=Homo sapiens GN=RBSN PE=1 SV=2	1.8005	0.000518063	0.0010179	0.00097307	0.0011633	0.0010758	0.00105752	24	27	29	26	26.5	0.00047903	0.00051833	0.00073026	0.00062176	0.000587345	14	17	24	19	18.5
NUP153	Nuclear pore complex protein Nup153 OS=Homo sapiens GN=NUP153 PE=1 SV=2	1.79726	0.0487972	0.001285	0.00072793	0.0010234	0.00096765	0.001001	57	38	48	44	46.75	0.00016368	0.00064825	0.0005984	0.0008175	0.000556958	9	40	37	47	33.25
ACTR1A	Alpha-centractin OS=Homo sapiens GN=ACTR1A PE=1 SV=1	1.79706	0.00843911	0.00035375	0.00045088	0.0005855	0.00051763	0.00047694	4	6	7	6	5.75	0.00028538	0.0002543	0.00031722	0.0002047	0.0002654	4	4	5	3	4
ZMYM4	Zinc finger MYM-type protein 4 OS=Homo sapiens GN=ZMYM4 PE=1 SV=1	1.79595	0.0278541	0.0010311	0.0007301	0.00097519	0.0010058	0.000935548	48	40	48	48	46	0.00015596	0.00055591	0.00070887	0.00066294	0.00052092	9	36	46	40	32.75
BPTF	Nucleosome-remodeling factor subunit BPTF OS=Homo sapiens GN=BPTF PE=1 SV=3	1.79465	0.0012726	0.00067684	0.00050091	0.0007021	0.00071351	0.00064834	62	54	68	67	62.75	0.00036108	0.00033745	0.00037592	0.0003706	0.000361263	41	43	48	44	44
SETD2	Histone-lysine N-methyltransferase SETD2 OS=Homo sapiens GN=SETD2 PE=1 SV=3	1.79053	0.0706212	0.00051876	0.0002204	0.00047837	0.00048075	0.00042457	40	20	39	38	34.25	0.00010463	0.00026104	0.0002326	0.00035021	0.00023712	10	28	25	35	24.5
KDM3B	Lysine-specific demethylase 3B OS=Homo sapiens GN=KDM3B PE=1 SV=2	1.79005	0.0630594	0.00073642	0.0003209	0.00060721	0.00058945	0.000563495	39	20	34	32	31.25	0.00015233	0.00031221	0.00047412	0.00032051	0.000314792	10	23	35	22	22.5
HLCS	Biotin--protein ligase OS=Homo sapiens GN=HLCS PE=1 SV=1	1.78977	0.0201538	0.00041222	0.00027243	0.00034655	0.00044681	0.000369502	9	7	8	10	8.5	0.0002217	0.0001317	0.00029572	0.00017669	0.000206452	6	4	9	5	6
LZTS2	Leucine zipper putative tumor suppressor 2 OS=Homo sapiens GN=LZTS2 PE=1 SV=2	1.78605	0.0122342	0.0012426	0.0010136	0.00089319	0.0010182	0.0010419	25	24	19	21	22.25	0.00056138	0.00060743	0.00032092	0.00084368	0.000583352	14	17	9	22	15.5
SUMO2	Small ubiquitin-related modifier 2 OS=Homo sapiens GN=SUMO2 PE=1 SV=3	1.78211	0.114155	0.0014001	0.00059484	0	0.0010244	0.00100645	4	2	0	3	3	0.00056475	0	0	0	0.00056475	2	0	0	0	2
PCCB	Propionyl-CoA carboxylase beta chain, mitochondrial OS=Homo sapiens GN=PCCB PE=1 SV=3	1.78077	0.000213922	0.010179	0.0088592	0.009044	0.0093282	0.0093526	165	169	155	155	161	0.0064203	0.0048784	0.0044258	0.0052835	0.005252	129	110	100	111	112.5
CAPZB	F-actin-capping protein subunit beta OS=Homo sapiens GN=CAPZB PE=1 SV=4	1.77943	0.0289059	0.0014405	0.0023461	0.0024978	0.0014053	0.00192242	12	23	22	12	17.25	0.00096844	0.0012082	0.0010334	0.0011114	0.00108036	10	14	12	12	12
MFAP1	Microfibrillar-associated protein 1 OS=Homo sapiens GN=MFAP1 PE=1 SV=2	1.77668	0.71636	0	0.00019309	0	0	0.00019309	0	3	0	0	3	0	0	0.00010868	0	0.00010868	0	0	2	0	2
AQR	Intron-binding protein aquarius OS=Homo sapiens GN=AQR PE=1 SV=4	1.77667	0.716362	0	5.7081e-05	0	0	5.7081e-05	0	3	0	0	3	0	0	3.2128e-05	0	3.2128e-05	0	0	2	0	2
RCOR3	REST corepressor 3 OS=Homo sapiens GN=RCOR3 PE=1 SV=2	1.77208	0.0126266	0.00026871	0.00017124	0.0001906	0.00026213	0.00022317	4	3	3	4	3.5	0	0	9.6384e-05	0.00015549	0.000125937	0	0	2	3	2.5
HNRNPM	Heterogeneous nuclear ribonucleoprotein M OS=Homo sapiens GN=HNRNPM PE=1 SV=3	1.76909	0.00101405	0.0015487	0.0016256	0.0014648	0.001733	0.00159303	34	42	34	39	37.25	0.00062471	0.0011133	0.00091499	0.00094891	0.000900477	17	34	28	27	26.5
NSRP1	Nuclear speckle splicing regulatory protein 1 OS=Homo sapiens GN=NSRP1 PE=1 SV=1	1.75291	0.00111194	0.00017878	0.00015191	0.00016908	0.0001744	0.000168543	3	3	3	3	3	9.615e-05	0	0	0	9.615e-05	2	0	0	0	2
DSG2	Desmoglein-2 OS=Homo sapiens GN=DSG2 PE=1 SV=2	1.74967	0.133612	0.00032717	0.00068237	0.00059074	0.00066733	0.000566902	11	27	21	23	20.5	0.00019196	0.00066282	0.00023471	0.00020653	0.000324005	8	31	11	9	14.75
CGNL1	Cingulin-like protein 1 OS=Homo sapiens GN=CGNL1 PE=1 SV=2	1.74802	0.0853986	7.6618e-05	0.00021701	9.662e-05	7.4742e-05	0.000116247	3	10	4	3	5	4.1207e-05	9.1798e-05	0	0	6.65025e-05	2	5	0	0	3.5
NDUFA9	NADH dehydrogenase [ubiquinone] 1 alpha subcomplex subunit 9, mitochondrial OS=Homo sapiens GN=NDUFA9 PE=1 SV=2	1.73907	0.00127875	0.00052921	0.00067452	0.00058395	0.00051626	0.000575985	6	9	7	6	7	0.00035578	0.00038044	0.00031638	0.00027221	0.000331202	5	6	5	4	5
RAVER1	Ribonucleoprotein PTB-binding 1 OS=Homo sapiens GN=RAVER1 PE=1 SV=1	1.73672	0.130108	0.00027436	0.00013988	0.00046708	0.00026764	0.00028724	5	3	9	5	5.5	0.00017707	0.00011834	0.00019682	0.00016934	0.000165392	4	3	5	4	4
GATAD2B	Transcriptional repressor p66-beta OS=Homo sapiens GN=GATAD2B PE=1 SV=1	1.73032	0.00652972	0.0013458	0.0009053	0.0012728	0.0012034	0.00118183	24	19	24	22	22.25	0.00049761	0.00068528	0.00068387	0.00086528	0.00068301	11	17	17	20	16.25
MMTAG2	Multiple myeloma tumor-associated protein 2 OS=Homo sapiens GN=MMTAG2 PE=1 SV=1	1.72929	0.0027984	0.00075861	0.00085947	0.00095665	0.00074003	0.00082869	6	8	8	6	7	0.000612	0.00036356	0.00045352	0.00048775	0.000479208	6	4	5	5	5
LIN54	Protein lin-54 homolog OS=Homo sapiens GN=LIN54 PE=1 SV=3	1.72757	0.0274489	0.00053275	0.00045268	0.00054586	0.00069294	0.000556057	12	12	13	16	13.25	0.00014326	0.00031915	0.00041404	0.00041104	0.000321873	4	10	13	12	9.75
TRPS1	Zinc finger transcription factor Trps1 OS=Homo sapiens GN=TRPS1 PE=1 SV=2	1.71966	0.0173234	0.00051916	0.00055142	0.00063832	0.00065839	0.000591822	20	25	26	26	24.25	0.00016753	0.00035455	0.00035382	0.0005007	0.00034415	8	19	19	25	17.75
SAP130	Histone deacetylase complex subunit SAP130 OS=Homo sapiens GN=SAP130 PE=1 SV=1	1.71681	0.32726	6.3459e-05	0	0	9.2857e-05	7.8158e-05	2	0	0	3	2.5	0	0	4.5525e-05	0	4.5525e-05	0	0	2	0	2
IMMT	MICOS complex subunit MIC60 OS=Homo sapiens GN=IMMT PE=1 SV=1	1.71492	0.0344256	0.001009	0.00055914	0.00074683	0.0007703	0.000771318	23	15	18	18	18.5	0.00063703	0.00028382	0.00047207	0.00040616	0.00044977	18	9	15	12	13.5
RPA1	Replication protein A 70 kDa DNA-binding subunit OS=Homo sapiens GN=RPA1 PE=1 SV=2	1.70737	0.0116801	0.0010796	0.0013761	0.0011743	0.0012112	0.0012103	20	30	23	23	24	0.00087097	0.00093133	0.00065834	0.00037484	0.00070887	20	24	17	9	17.5
ICE2	Little elongation complex subunit 2 OS=Homo sapiens GN=ICE2 PE=1 SV=2	1.7066	0.0227808	0.00077882	0.00043159	0.00067255	0.00059459	0.000619387	23	15	21	18	19.25	0.00030049	0.00038948	0.00029151	0.00047027	0.000362938	11	16	12	18	14.25
TOP2A	DNA topoisomerase 2-alpha OS=Homo sapiens GN=TOP2A PE=1 SV=3	1.70033	0.507157	0.00030407	0.0013288	6.1626e-05	0.00038138	0.000518969	14	72	3	18	26.75	0.00033291	0.00062454	6.2325e-05	0.00020109	0.000305216	19	40	4	12	18.75
RPL35	60S ribosomal protein L35 OS=Homo sapiens GN=RPL35 PE=1 SV=2	1.69651	0.0290115	0.00054069	0.00068915	0.00051138	0.0010549	0.00069903	2	3	2	4	2.75	0.00043619	0	0.00038789	0	0.00041204	2	0	2	0	2
NKRF	NF-kappa-B-repressing factor OS=Homo sapiens GN=NKRF PE=1 SV=2	1.68904	0.0339764	0.00096384	0.00057329	0.00072927	0.0010813	0.000836925	20	14	16	23	18.25	0.00038878	0.00045037	0.00062231	0.00052055	0.000495503	10	13	18	14	13.75
HDAC3	Histone deacetylase 3 OS=Homo sapiens GN=HDAC3 PE=1 SV=2	1.68734	0.0419575	0.00093231	0.00059415	0.00095525	0.00060632	0.000772007	13	9	14	10	11.5	0	0.00061436	0.00027868	0.00047955	0.00045753	0	13	5	8	8.66667
SQSTM1	Sequestosome-1 OS=Homo sapiens GN=SQSTM1 PE=1 SV=1	1.68379	0.0241553	0.00075573	0.00096324	0.00064329	0.00088468	0.000811735	10	15	9	12	11.5	0.00060968	0.00054328	0.00054216	0.00023323	0.000482088	10	10	10	4	8.5
PURA	Transcriptional activator protein Pur-alpha OS=Homo sapiens GN=PURA PE=1 SV=2	1.68251	0.633466	0.00041307	0.0001755	0	0.00030222	0.00029693	4	2	0	3	3	0.00024993	0.00014847	0.00014817	0.00015935	0.00017648	3	2	2	2	2.25
SUMO1	Small ubiquitin-related modifier 1 OS=Homo sapiens GN=SUMO1 PE=1 SV=1	1.68172	0.00898168	0.0013169	0.0013988	0.0015569	0.001927	0.0015499	4	5	5	6	5	0.00079681	0.0009467	0.0011809	0.00076205	0.000921615	3	4	5	3	3.75
RPS5	40S ribosomal protein S5 OS=Homo sapiens GN=RPS5 PE=1 SV=4	1.67905	0.336887	0	0	0.00030833	0.00047703	0.00039268	0	0	2	3	2.5	0	0	0.00023387	0	0.00023387	0	0	2	0	2
SNW1	SNW domain-containing protein 1 OS=Homo sapiens GN=SNW1 PE=1 SV=1	1.66863	0.00526142	0.00055834	0.00052715	0.0007041	0.00060519	0.000598695	9	10	12	10	10.25	0.00025024	0.00044597	0.00035605	0.00038292	0.000358795	5	10	8	8	7.75
NOL11	Nucleolar protein 11 OS=Homo sapiens GN=NOL11 PE=1 SV=1	1.6618	0.486201	0.00013874	0.00035368	0	0.00013535	0.000209257	3	9	0	3	5	0.00011193	0.00019948	6.6356e-05	0	0.000125922	3	6	2	0	3.66667
PC	Pyruvate carboxylase, mitochondrial OS=Homo sapiens GN=PC PE=1 SV=2	1.66125	0.000249117	0.017275	0.01396	0.014684	0.014925	0.015211	612	582	550	542	571.5	0.0093822	0.0088271	0.0084849	0.0099312	0.00915635	412	435	419	456	430.5
MTA1	Metastasis-associated protein MTA1 OS=Homo sapiens GN=MTA1 PE=1 SV=2	1.66096	0.0479144	0.0010231	0.00094842	0.00087971	0.0015425	0.00109843	22	24	20	34	25	0.00071286	0.00053492	0.00050046	0.00089705	0.000661322	19	16	15	25	18.75
MRE11	Double-strand break repair protein MRE11 OS=Homo sapiens GN=MRE11 PE=1 SV=3	1.6571	0.0169314	0.00418	0.0035917	0.0042644	0.0038028	0.00395972	89	90	96	83	89.5	0.0018187	0.0024985	0.0016173	0.0036237	0.00238955	48	74	48	100	67.5
FAM160A1	Protein FAM160A1 OS=Homo sapiens GN=FAM160A1 PE=2 SV=2	1.65379	0.0155544	0.00038368	0.00029885	0.00033264	0.00031191	0.00033177	12	11	11	10	11	0.00028374	0.00011492	0.00020644	0.00019735	0.000200613	11	5	9	8	8.25
CEP164	Centrosomal protein of 164 kDa OS=Homo sapiens GN=CEP164 PE=1 SV=3	1.65224	0.0269095	9.1102e-05	5.8058e-05	0.0001077	0.00013331	9.75425e-05	4	3	5	6	4.5	0	0	6.5356e-05	5.2717e-05	5.90365e-05	0	0	4	3	3.5
COIL	Coilin OS=Homo sapiens GN=COIL PE=1 SV=1	1.65162	0.00770611	0.00075049	0.00098108	0.0008736	0.00107	0.000918793	13	20	16	19	17	0.00055887	0.00053951	0.00041415	0.00071266	0.000556298	12	13	10	16	12.75
FARP1	FERM, ARHGEF and pleckstrin domain-containing protein 1 OS=Homo sapiens GN=FARP1 PE=1 SV=1	1.64497	0.244204	0	0.00013519	0.00018057	9.3124e-05	0.000136295	0	5	6	3	4.66667	5.1341e-05	0.00011437	0	0	8.28555e-05	2	5	0	0	3.5
HSPD1	60 kDa heat shock protein, mitochondrial OS=Homo sapiens GN=HSPD1 PE=1 SV=2	1.64219	0.00167637	0.0011026	0.0010355	0.00093306	0.0011322	0.00105084	19	21	17	20	19.25	0.00060861	0.00066748	0.000791	0.00049252	0.000639903	13	16	19	11	14.75
GPATCH8	G patch domain-containing protein 8 OS=Homo sapiens GN=GPATCH8 PE=1 SV=2	1.64053	0.11555	8.8555e-05	3.7623e-05	0.00012563	0.00015118	0.000100747	4	2	6	7	4.75	5.358e-05	0	7.9411e-05	5.1243e-05	6.14113e-05	3	0	5	3	3.66667
KRT1	Keratin, type II cytoskeletal 1 OS=Homo sapiens GN=KRT1 PE=1 SV=6	1.63869	0.00837307	0.0060928	0.0045629	0.0054695	0.0070518	0.00579425	126	110	119	146	125.25	0.0033324	0.0036005	0.0042228	0.0029879	0.0035359	85	101	122	79	96.75
RAB1B	Ras-related protein Rab-1B OS=Homo sapiens GN=RAB1B PE=1 SV=1	1.63829	0.0799078	0.0013235	0.00042172	0.0010953	0.0012911	0.0010329	9	5	9	10	8.25	0.00066731	0.00071356	0	0.00051056	0.000630477	6	7	0	6	6.33333
CD59	CD59 glycoprotein OS=Homo sapiens GN=CD59 PE=1 SV=1	1.63625	0.262445	0	0.0011037	0.0004914	0.0012671	0.000954067	0	5	2	5	4	0.00041915	0.00074701	0	0	0.00058308	2	4	0	0	3
GPC4	Glypican-4 OS=Homo sapiens GN=GPC4 PE=1 SV=4	1.6331	0.0696879	0.00065787	0.0012705	0.0010182	0.00081679	0.00094084	11	25	18	14	17	0.00072372	0.00077388	0	0.00023072	0.000576107	15	18	0	5	12.6667
SUN2	SUN domain-containing protein 2 OS=Homo sapiens GN=SUN2 PE=1 SV=3	1.63283	0.210322	0	0.00015763	0	0	0.00015763	0	4	0	0	4	0.00011224	0.00010002	6.6541e-05	0.00010735	9.65377e-05	3	3	2	3	2.75
SNX2	Sorting nexin-2 OS=Homo sapiens GN=SNX2 PE=1 SV=2	1.63223	0.64272	0.00012814	0.00021776	0	0.0001875	0.0001778	3	5	0	3	3.66667	0.00010338	9.2117e-05	9.1927e-05	0.0001483	0.000108931	3	2	2	3	2.5
TMEM33	Transmembrane protein 33 OS=Homo sapiens GN=TMEM33 PE=1 SV=2	1.63201	0.0970101	0.00040387	0.00068636	0.00063663	0.00078797	0.000628708	3	6	5	6	5	0.00043443	0.00019356	0.00028974	0.00062321	0.000385235	4	2	3	6	3.75
KRT8	Keratin, type II cytoskeletal 8 OS=Homo sapiens GN=KRT8 PE=1 SV=7	1.63021	0.0512159	0.0022031	0.0035684	0.0030603	0.0027536	0.00289635	49	87	62	56	63.5	0.0016662	0.002821	0.0011853	0.0014342	0.00177668	40	92	44	34	52.5
SRSF10	Serine/arginine-rich splicing factor 10 OS=Homo sapiens GN=SRSF10 PE=1 SV=1	1.62818	0.0834855	0.00038075	0.00086275	0.00060019	0.00061905	0.000615685	3	8	5	5	5.25	0.00030717	0.00054743	0.0003642	0.00029377	0.000378143	3	6	4	3	4
SATB1	DNA-binding protein SATB1 OS=Homo sapiens GN=SATB1 PE=1 SV=1	1.62543	0.0299062	0.00034865	0.00018516	0.00032975	0.00025508	0.00027966	8	5	8	6	6.75	0.00017579	0.00018798	0.00015632	0.00016812	0.000172052	5	6	5	5	5.25
RBM10	RNA-binding protein 10 OS=Homo sapiens GN=RBM10 PE=1 SV=3	1.62438	0.00290899	0.00035755	0.00027344	0.00037199	0.0003488	0.000337945	10	9	11	10	10	0.00017307	0.00020563	0.0002052	0.00024828	0.000208045	6	8	8	9	7.75
SREK1IP1	Protein SREK1IP1 OS=Homo sapiens GN=SREK1IP1 PE=1 SV=1	1.61867	0.0224357	0.00085812	0.00072916	0.0010145	0.00083711	0.000859722	4	4	5	4	4.25	0.00069228	0.00030844	0.00046171	0.00066208	0.000531128	4	2	3	4	3.25
WDR75	WD repeat-containing protein 75 OS=Homo sapiens GN=WDR75 PE=1 SV=1	1.61456	0.800107	8.0126e-05	0.00057872	0	0	0.000329423	2	17	0	0	9.5	0.00025856	0.0003168	8.6223e-05	0.00015455	0.000204033	8	11	3	5	6.75
NSD1	Histone-lysine N-methyltransferase, H3 lysine-36 and H4 lysine-20 specific OS=Homo sapiens GN=NSD1 PE=1 SV=1	1.61144	0.0811654	0.00027135	0.00016769	0.00029163	0.0003008	0.000257868	22	16	25	25	22	6.9652e-05	0.00015073	0.0002389	0.00018081	0.000160023	7	17	27	19	17.5
PCID2	PCI domain-containing protein 2 OS=Homo sapiens GN=PCID2 PE=1 SV=2	1.60854	0.627654	0.00033336	0	0	0.0001626	0.00024798	4	0	0	2	3	0	0.00017973	0	0.0001286	0.000154165	0	3	0	2	2.5
RPL28	60S ribosomal protein L28 OS=Homo sapiens GN=RPL28 PE=1 SV=3	1.6084	0.0192298	0.0021845	0.0020624	0.0025252	0.0023677	0.00228495	9	10	11	10	10	0.0019581	0.0010469	0.0017412	0.00093634	0.00142063	10	6	10	5	7.75
GTF3C5	General transcription factor 3C polypeptide 5 OS=Homo sapiens GN=GTF3C5 PE=1 SV=2	1.60669	0.113697	0.00070477	0.00032665	0.00048477	0.00043751	0.000488425	11	6	8	7	8	0.0004135	0.00013817	0.00036771	0.0002966	0.000303995	8	3	8	6	6.25
KDELR1	ER lumen protein-retaining receptor 1 OS=Homo sapiens GN=KDELR1 PE=1 SV=1	1.60614	0.0481741	0.0006274	0.00039983	0.00044504	0.00061204	0.000521078	4	3	3	4	3.5	0.00037961	0.00045102	0.00022505	0.00024203	0.000324428	3	4	2	2	2.75
ACOT9	Acyl-coenzyme A thioesterase 9, mitochondrial OS=Homo sapiens GN=ACOT9 PE=1 SV=2	1.60354	0.175104	0.00015149	0.00032181	0.0003582	0.00044335	0.000318713	2	5	5	6	4.5	0.00012221	0.0001089	0.0002717	0.00029221	0.000198755	2	2	5	5	3.5
SF3B2	Splicing factor 3B subunit 2 OS=Homo sapiens GN=SF3B2 PE=1 SV=2	1.60335	0.00303631	0.00092884	0.00069454	0.00091362	0.00090609	0.000860773	25	22	26	25	24.5	0.0004496	0.00050746	0.00055973	0.00063064	0.000536858	15	19	21	22	19.25
DVL2	Segment polarity protein dishevelled homolog DVL-2 OS=Homo sapiens GN=DVL2 PE=1 SV=1	1.60256	0.00271637	0.0043373	0.0030712	0.0040167	0.0040988	0.003881	96	80	94	93	90.75	0.0021504	0.0026632	0.0023985	0.0024749	0.00242175	59	82	74	71	71.5
NOP58	Nucleolar protein 58 OS=Homo sapiens GN=NOP58 PE=1 SV=1	1.59973	0.0231025	0.00132	0.0013887	0.00083232	0.0014717	0.00125318	21	26	14	24	21.25	0.00091279	0.00081338	0.00063132	0.00077598	0.000783367	18	18	14	16	16.5
CHCHD3	MICOS complex subunit MIC19 OS=Homo sapiens GN=CHCHD3 PE=1 SV=1	1.59449	0.685009	0.00058594	0	0.00041564	0.0007145	0.000572027	4	0	3	5	4	0.0004727	0.00031592	0.00042035	0.00022604	0.000358753	4	3	4	2	3.25
RAB14	Ras-related protein Rab-14 OS=Homo sapiens GN=RAB14 PE=1 SV=4	1.59158	0.194246	0.00061865	0.0011828	0.0016091	0.00090525	0.00107895	4	9	11	6	7.5	0.00074863	0.0006671	0.00022191	0.001074	0.00067791	6	6	2	9	5.75
SLX4	Structure-specific endonuclease subunit SLX4 OS=Homo sapiens GN=SLX4 PE=1 SV=3	1.59016	0.069108	0.00074337	0.00052381	0.00060019	0.00047755	0.00058623	41	34	35	27	34.25	0.0001609	0.00036495	0.00040322	0.00054557	0.00036866	11	28	31	39	27.25
SON	Protein SON OS=Homo sapiens GN=SON PE=1 SV=4	1.58909	0.0039768	0.00063051	0.00053575	0.00054447	0.00068192	0.000598163	46	46	42	51	46.25	0.00033173	0.00031531	0.00039332	0.00046531	0.000376417	30	32	40	44	36.5
HNRNPH1	Heterogeneous nuclear ribonucleoprotein H OS=Homo sapiens GN=HNRNPH1 PE=1 SV=4	1.58758	0.00306754	0.0018515	0.0015732	0.0014009	0.0015172	0.0015857	25	25	20	21	22.75	0.00089619	0.0012245	0.0009032	0.00097137	0.000998815	15	23	17	17	18
DKC1	H/ACA ribonucleoprotein complex subunit 4 OS=Homo sapiens GN=DKC1 PE=1 SV=3	1.58649	0.00774041	0.0024583	0.001924	0.0018968	0.0022088	0.00212197	38	35	31	35	34.75	0.0017223	0.0012092	0.001021	0.0013976	0.00133752	33	26	22	28	27.25
RAB5C	Ras-related protein Rab-5C OS=Homo sapiens GN=RAB5C PE=1 SV=2	1.5859	0.0182181	0.0013855	0.00091567	0.0011648	0.0015018	0.00124194	9	7	8	10	8.5	0.00074516	0.00066401	0.00077308	0.00095021	0.000783115	6	6	7	8	6.75
FASTKD5	FAST kinase domain-containing protein 5, mitochondrial OS=Homo sapiens GN=FASTKD5 PE=1 SV=1	1.58371	0.695962	0.0001741	0.00011095	0	0	0.000142525	4	3	0	0	3.5	0.00010534	6.2577e-05	0.0001249	6.7161e-05	8.99945e-05	3	2	4	2	2.75
RPS20	40S ribosomal protein S20 OS=Homo sapiens GN=RPS20 PE=1 SV=1	1.58064	0.621473	0	0	0.00052857	0.00081777	0.00067317	0	0	2	3	2.5	0.00045085	0	0.00040092	0	0.000425885	2	0	2	0	2
GOLPH3	Golgi phosphoprotein 3 OS=Homo sapiens GN=GOLPH3 PE=1 SV=1	1.57712	0.104428	0.00022317	0	0.00031661	0.00021771	0.000252497	2	0	3	2	2.33333	0	0	0.0001601	0	0.0001601	0	0	2	0	2
SDE2	Replication stress response regulator SDE2 OS=Homo sapiens GN=SDE2 PE=1 SV=1	1.57706	0.104434	0.00014746	0	0.0002092	0.00014385	0.000166837	2	0	3	2	2.33333	0	0	0.00010579	0	0.00010579	0	0	2	0	2
RPS27	40S ribosomal protein S27 OS=Homo sapiens GN=RPS27 PE=1 SV=3	1.57371	0.164849	0.002771	0.0016818	0.0011232	0.0015447	0.00178017	7	5	3	4	4.75	0.0015968	0.0011383	0.00056798	0.0012217	0.00113119	5	4	2	4	3.75
SMARCE1	SWI/SNF-related matrix-associated actin-dependent regulator of chromatin subfamily E member 1 OS=Homo sapiens GN=SMARCE1 PE=1 SV=2	1.57219	0.194369	0.00032362	0.00020624	0.00045912	0.0006314	0.000405095	4	3	6	8	5.25	0.00019581	0.00017448	0.00034825	0.00031211	0.000257662	3	3	6	5	4.25
SLC25A3	Phosphate carrier protein, mitochondrial OS=Homo sapiens GN=SLC25A3 PE=1 SV=2	1.56783	0.0489817	0.000643	0.00070247	0.00060814	0.00089608	0.000712423	7	9	7	10	8.25	0.00066694	0.00026414	0.00046129	0.00042523	0.0004544	9	4	7	6	6.5
RPL32	60S ribosomal protein L32 OS=Homo sapiens GN=RPL32 PE=1 SV=2	1.56669	0.115713	0.00073894	0.00062789	0.0016307	0.00096113	0.000989665	3	3	7	4	4.25	0.00079484	0	0.00053011	0.00057013	0.000631693	4	0	3	3	3.33333
WDR33	pre-mRNA 3' end processing protein WDR33 OS=Homo sapiens GN=WDR33 PE=1 SV=2	1.56355	0.140864	0.00077157	0.00029609	0.00049434	0.0004856	0.0005119	31	14	21	20	21.5	0.00024095	0.00032206	0.00028569	0.00046088	0.000327395	12	18	16	24	17.5
ASH2L	Set1/Ash2 histone methyltransferase complex subunit ASH2 OS=Homo sapiens GN=ASH2L PE=1 SV=1	1.55813	0.0152009	0.0003177	0.00031494	0.00045071	0.00041323	0.000374145	6	7	9	8	7.5	0.0002563	0.00019032	0.00022791	0.00028597	0.000240125	6	5	6	7	6
GPKOW	G-patch domain and KOW motifs-containing protein OS=Homo sapiens GN=GPKOW PE=1 SV=2	1.557	0.0196916	0.00097801	0.00083103	0.00099106	0.0013629	0.00104075	14	14	15	20	15.75	0.00067628	0.00065285	0.00075173	0.00059288	0.000668435	12	13	15	11	12.75
CHD8	Chromodomain-helicase-DNA-binding protein 8 OS=Homo sapiens GN=CHD8 PE=1 SV=5	1.55669	0.0872393	0.00034785	0.00021895	0.00038992	0.00026393	0.000305162	27	20	32	21	25	0.00013512	0.00013892	0.00022182	0.00028827	0.000196032	13	15	24	29	20.25
MTA2	Metastasis-associated protein MTA2 OS=Homo sapiens GN=MTA2 PE=1 SV=1	1.55574	0.0795243	0.0010951	0.00059217	0.00080037	0.0012626	0.00093756	24	14	19	30	21.75	0.00068269	0.0004652	0.00057138	0.00069132	0.000602647	18	14	17	20	17.25
BRD8	Bromodomain-containing protein 8 OS=Homo sapiens GN=BRD8 PE=1 SV=2	1.54772	0.0986465	0.00018847	0.00016015	0.00022919	0.00028892	0.000216683	7	7	9	11	8.5	6.5164e-05	0.00013549	0.00019316	0.00016619	0.000140001	3	7	10	8	7
EWSR1	RNA-binding protein EWS OS=Homo sapiens GN=EWSR1 PE=1 SV=1	1.54564	0.0358487	0.00025345	0.00021536	0.00023971	0.00024724	0.00023894	5	5	5	5	5	0.00020447	7.2879e-05	0.00014546	0.00019555	0.00015459	5	2	4	5	4
SF3A2	Splicing factor 3A subunit 2 OS=Homo sapiens GN=SF3A2 PE=1 SV=2	1.5436	0.43868	0.00021499	0	0.00027112	0.00027964	0.00025525	3	0	4	4	3.66667	0.00023126	0	0.00015424	0.00011058	0.00016536	4	0	3	2	3
PUF60	Poly(U)-binding-splicing factor PUF60 OS=Homo sapiens GN=PUF60 PE=1 SV=1	1.53861	0.0678383	0.00095177	0.000556	0.00073139	0.00063832	0.00071937	16	11	13	11	12.75	0.00028793	0.00042762	0.00051209	0.00064254	0.000467545	6	10	12	14	10.5
ZCCHC17	Nucleolar protein of 40 kDa OS=Homo sapiens GN=ZCCHC17 PE=1 SV=1	1.53517	0.103255	0.00055191	0.0005862	0.00065248	0.00094219	0.000683195	4	5	5	7	5.25	0.00066786	0.00049594	0.00029695	0.00031937	0.00044503	6	5	3	3	4.25
SF1	Splicing factor 1 OS=Homo sapiens GN=SF1 PE=1 SV=4	1.53289	0.0700121	0.00031223	0.00026531	0.00039374	0.00010153	0.000268202	6	6	8	2	5.5	0.00012594	0	0.00022399	0	0.000174965	3	0	6	0	4.5
DHX15	Pre-mRNA-splicing factor ATP-dependent RNA helicase DHX15 OS=Homo sapiens GN=DHX15 PE=1 SV=2	1.53175	0.0103887	0.001213	0.0012795	0.00094943	0.00097927	0.0011053	29	36	24	24	28.25	0.00067486	0.00060136	0.00090019	0.00070997	0.000721595	20	20	30	22	23
MLF2	Myeloid leukemia factor 2 OS=Homo sapiens GN=MLF2 PE=1 SV=1	1.52833	0.980715	0	0.00056966	0	0.0002616	0.00041563	0	5	0	2	3.5	0.00021634	0.00028916	0	0.00031035	0.00027195	2	3	0	3	2.66667
HNRNPA2B1	Heterogeneous nuclear ribonucleoproteins A2/B1 OS=Homo sapiens GN=HNRNPA2B1 PE=1 SV=2	1.52776	0.156763	0.0034854	0.0059231	0.002851	0.0032162	0.00386892	37	74	32	35	44.5	0.0018239	0.0037245	0.0018922	0.0026891	0.00253243	24	55	28	37	36
CDK11B	Cyclin-dependent kinase 11B OS=Homo sapiens GN=CDK11B PE=1 SV=3	1.5242	0.0894989	0.00025096	0.0001777	0.00023736	0.00016321	0.000207308	6	5	6	4	5.25	0.00020246	9.0205e-05	9.0019e-05	0.00016136	0.000136011	6	3	3	5	4.25
GNB2	Guanine nucleotide-binding protein G(I)/G(S)/G(T) subunit beta-2 OS=Homo sapiens GN=GNB2 PE=1 SV=3	1.52217	0.542291	0	0.00058172	0.000185	0.00057244	0.000446387	0	12	4	13	9.66667	0.0002367	0.00049215	0	0.00015092	0.000293257	5	14	0	4	7.66667
PPP1R2	Protein phosphatase inhibitor 2 OS=Homo sapiens GN=PPP1R2 PE=1 SV=2	1.52007	0.472462	0.00048662	0	0	0	0.00048662	3	0	0	0	3	0.00026172	0.00023321	0.00046546	0	0.00032013	2	2	4	0	2.66667
RAB21	Ras-related protein Rab-21 OS=Homo sapiens GN=RAB21 PE=1 SV=3	1.51963	0.00644563	0.00088673	0.0010046	0.00083866	0.0010092	0.000934797	6	8	6	7	6.75	0.00071536	0.00042496	0.00063613	0.00068415	0.00061515	6	4	6	6	5.5
SEC61A1	Protein transport protein Sec61 subunit alpha isoform 1 OS=Homo sapiens GN=SEC61A1 PE=1 SV=2	1.51867	0.116234	0.00013972	0.00011872	0.00019821	0	0.000152217	2	2	3	0	2.33333	0	0	0.00010023	0	0.00010023	0	0	2	0	2
MED27	Mediator of RNA polymerase II transcription subunit 27 OS=Homo sapiens GN=MED27 PE=1 SV=1	1.51861	0.116244	0.00021384	0.0001817	0.00030337	0	0.00023297	2	2	3	0	2.33333	0	0	0.00015341	0	0.00015341	0	0	2	0	2
RBM12B	RNA-binding protein 12B OS=Homo sapiens GN=RBM12B PE=1 SV=2	1.51537	0.0274268	0.00023253	0.00019759	0.00015709	0.00012962	0.000179208	7	7	5	4	5.75	0.000134	0	0	0.00010252	0.00011826	5	0	0	4	4.5
HNRNPC	Heterogeneous nuclear ribonucleoproteins C1/C2 OS=Homo sapiens GN=HNRNPC PE=1 SV=4	1.51522	0.423083	0.002282	0.0063712	0.0015417	0.0023322	0.00313177	21	69	15	22	31.75	0.0016657	0.0037497	0.0010914	0.0017607	0.00206688	19	48	14	21	25.5
DDX54	ATP-dependent RNA helicase DDX54 OS=Homo sapiens GN=DDX54 PE=1 SV=2	1.51435	0.758334	7.5488e-05	0	0.00010709	0.00011046	9.76793e-05	2	0	3	3	2.66667	9.1348e-05	5.4266e-05	5.4154e-05	5.8242e-05	6.45025e-05	3	2	2	2	2.25
RAD50	DNA repair protein RAD50 OS=Homo sapiens GN=RAD50 PE=1 SV=1	1.51264	0.0563721	0.0026359	0.001486	0.0021574	0.0020521	0.00208285	104	69	90	83	86.5	0.0012472	0.0014211	0.00098184	0.0018577	0.00137696	61	78	54	95	72
UFD1	Ubiquitin recognition factor in ER-associated degradation protein 1 OS=Homo sapiens GN=UFD1 PE=1 SV=3	1.5123	0.80996	0	0	0.00030733	0	0.00030733	0	0	3	0	3	0	0.00015573	0	0.00025071	0.00020322	0	2	0	3	2.5
PGAM5	Serine/threonine-protein phosphatase PGAM5, mitochondrial OS=Homo sapiens GN=PGAM5 PE=1 SV=2	1.50971	0.130857	0.00046024	0.00039107	0.00043529	0.00067346	0.000490015	4	4	4	6	4.5	0.00037129	0.00016543	0.00049526	0.00026632	0.000324575	4	2	6	3	3.75
PRPF38B	Pre-mRNA-splicing factor 38B OS=Homo sapiens GN=PRPF38B PE=1 SV=1	1.50837	0.221328	0.00048721	0.00031049	0.0003456	0.00017823	0.000330383	8	6	6	3	5.75	0.00029479	8.7561e-05	0.00030583	0.00018795	0.000219033	6	2	7	4	4.75
JUP	Junction plakoglobin OS=Homo sapiens GN=JUP PE=1 SV=3	1.50494	0.132112	0.0010266	0.0017067	0.0013086	0.0014369	0.0013697	23	45	31	33	33	0.00075617	0.0015081	0.00092859	0.00044768	0.000910135	21	47	29	13	27.5
FAU	40S ribosomal protein S30 OS=Homo sapiens GN=FAU PE=1 SV=1	1.50347	0.146327	0.0033816	0.0014367	0.0026652	0.002749	0.00255812	6	3	5	5	4.75	0.001364	0.0012155	0.0016173	0.0026091	0.00170148	3	3	4	6	4
CSNK2B	Casein kinase II subunit beta OS=Homo sapiens GN=CSNK2B PE=1 SV=1	1.5005	0.154658	0.00092797	0.00078851	0.00073139	0.0013579	0.000951442	6	6	5	9	6.5	0.00062386	0.00055591	0.00099858	0.00035799	0.000634085	5	5	9	3	5.5
TKT	Transketolase OS=Homo sapiens GN=TKT PE=1 SV=3	1.49939	0.273624	0.00026687	0.00013606	0.00015144	0.00036447	0.00022971	5	3	3	7	4.5	0.0002153	7.6739e-05	0.00011487	0.0002059	0.000153202	5	2	3	5	3.75
ACACB	Acetyl-CoA carboxylase 2 OS=Homo sapiens GN=ACACB PE=1 SV=3	1.49869	0.00735793	0.0013528	0.0011495	0.0013435	0.0012933	0.00128477	151	153	155	136	148.75	0.0010914	0.00063213	0.00091228	0.00079326	0.000857268	133	101	135	125	123.5
ACACA	Acetyl-CoA carboxylase 1 OS=Homo sapiens GN=ACACA PE=1 SV=2	1.49837	0.000419303	0.0086603	0.0083946	0.0084322	0.0076325	0.0082799	611	697	629	552	622.25	0.0058088	0.0050845	0.0049113	0.0062991	0.00552593	508	499	483	576	516.5
KDM1A	Lysine-specific histone demethylase 1A OS=Homo sapiens GN=KDM1A PE=1 SV=2	1.49672	0.23455	0.00035126	0.00013265	0.00018456	0.00038073	0.0002623	9	4	5	10	7	0.00012594	0.00014028	0.00022399	0.00021079	0.00017525	4	5	8	7	6
CDC73	Parafibromin OS=Homo sapiens GN=CDC73 PE=1 SV=1	1.49654	0.0996432	0.00037573	0.00026605	0.00041459	0.00030544	0.000340452	6	5	7	5	5.75	0.00035364	0.00013505	0.0001797	0.00024158	0.000227492	7	3	4	5	4.75
THRAP3	Thyroid hormone receptor-associated protein 3 OS=Homo sapiens GN=THRAP3 PE=1 SV=2	1.49213	0.0133724	0.00059193	0.00056214	0.00065863	0.0007133	0.0006315	17	19	20	21	19.25	0.00030899	0.00052564	0.00037469	0.00048356	0.00042322	11	21	15	18	16.25
DHX8	ATP-dependent RNA helicase DHX8 OS=Homo sapiens GN=DHX8 PE=1 SV=1	1.49068	0.028344	8.1768e-05	9.2639e-05	7.7335e-05	5.3177e-05	7.62298e-05	3	5	3	2	3.25	0	3.9187e-05	0	6.3088e-05	5.11375e-05	0	3	0	4	3.5
UBAC2	Ubiquitin-associated domain-containing protein 2 OS=Homo sapiens GN=UBAC2 PE=1 SV=1	1.49068	0.0283446	0.00028999	0.00032855	0.00027427	0.00018859	0.00027035	3	4	3	2	3	0	0.00013898	0	0.00022374	0.00018136	0	2	0	3	2.5
ECH1	Delta(3,5)-Delta(2,4)-dienoyl-CoA isomerase, mitochondrial OS=Homo sapiens GN=ECH1 PE=1 SV=2	1.48769	0.119461	0.0005069	0.000603	0.00076707	0.00098897	0.000716485	5	7	8	10	7.5	0.0005725	0.00043727	0.00029092	0.00062575	0.00048161	7	6	4	8	6.25
FAM50A	Protein FAM50A OS=Homo sapiens GN=FAM50A PE=1 SV=2	1.48753	0.685291	0	0.0001667	0	0.00038275	0.000274725	0	2	0	4	3	0.00015826	0	0.00021111	0	0.000184685	2	0	3	0	2.5
TRAP1	Heat shock protein 75 kDa, mitochondrial OS=Homo sapiens GN=TRAP1 PE=1 SV=3	1.48713	0.00545086	0.0008502	0.00088297	0.0010275	0.0011519	0.000978142	19	22	24	26	22.75	0.00068589	0.00071305	0.00057604	0.00065597	0.000657737	18	22	18	18	19
VDAC3	Voltage-dependent anion-selective channel protein 3 OS=Homo sapiens GN=VDAC3 PE=1 SV=1	1.48208	0.0342881	0.0015275	0.00099841	0.0017781	0.0016047	0.00147718	13	10	16	14	13.25	0.0010427	0.00084467	0.0010115	0.0010879	0.000996692	11	10	12	12	11.25
NACA	Nascent polypeptide-associated complex subunit alpha, muscle-specific form OS=Homo sapiens GN=NACA PE=1 SV=1	1.48164	0.0142898	0.00012802	0.00010878	0.00010594	0.00014049	0.000120808	8	8	7	9	8	9.0366e-05	5.7517e-05	9.1838e-05	8.6424e-05	8.15362e-05	7	5	8	7	6.75
DSG1	Desmoglein-1 OS=Homo sapiens GN=DSG1 PE=1 SV=2	1.48046	0.159702	0.0001585	0	5.9961e-05	0.00018554	0.000134667	5	0	2	6	4.33333	0	0	9.0963e-05	0	9.0963e-05	0	0	4	0	4
CDKN2A	Tumor suppressor ARF OS=Homo sapiens GN=CDKN2A PE=1 SV=2	1.47911	0.110605	0.0010076	0	0.00071477	0.00098298	0.000901783	4	0	3	4	3.66667	0.00060968	0	0	0	0.00060968	3	0	0	0	3
NOLC1	Nucleolar and coiled-body phosphoprotein 1 OS=Homo sapiens GN=NOLC1 PE=1 SV=2	1.47708	0.0495706	0.00071357	0.0007276	0.0005849	0.00083532	0.000715347	15	18	13	18	16	0.00053728	0.00064976	0.00027302	0.00047714	0.0004843	14	19	8	13	13.5
AAAS	Aladin OS=Homo sapiens GN=AAAS PE=1 SV=1	1.47684	0.793256	0	0	0	0.00017823	0.00017823	0	0	0	3	3	0.00014739	0	0	9.3977e-05	0.000120684	3	0	0	2	2.5
KIF23	Kinesin-like protein KIF23 OS=Homo sapiens GN=KIF23 PE=1 SV=3	1.47519	0.0719703	0.00076203	0.00094183	0.00072072	0.00084474	0.00081733	22	32	22	25	25.25	0.00053093	0.00079681	0.00062122	0.00026725	0.000554053	19	32	25	10	21.5
MTAP	S-methyl-5'-thioadenosine phosphorylase OS=Homo sapiens GN=MTAP PE=1 SV=2	1.47125	0.285087	0.0005875	0.00029952	0.00044452	0.00091698	0.00056213	5	3	4	8	5	0.00056875	0.0002534	0.00025288	0.00045328	0.000382078	6	3	3	5	4.25
ANXA6	Annexin A6 OS=Homo sapiens GN=ANXA6 PE=1 SV=3	1.46853	0.354399	0	0.0005038	0.00032711	0.00067479	0.0005019	0	12	7	14	11	7.972e-05	0.00060382	0	0	0.00034177	2	17	0	0	9.5
ACTL6A	Actin-like protein 6A OS=Homo sapiens GN=ACTL6A PE=1 SV=1	1.46747	0.0340473	0.0010076	0.00079035	0.0012463	0.0010586	0.00102571	13	12	17	14	14	0.00056278	0.00072437	0.00061167	0.00089705	0.000698967	9	13	11	15	12
DDX42	ATP-dependent RNA helicase DDX42 OS=Homo sapiens GN=DDX42 PE=1 SV=1	1.46663	0.117879	0.000709	0.00036147	0.00067057	0.00079539	0.000634108	20	12	20	23	18.75	0.00037179	0.00030581	0.0005595	0.00049233	0.000432358	13	12	22	18	16.25
H2AFV	Histone H2A.V OS=Homo sapiens GN=H2AFV PE=1 SV=3	1.4665	0.365444	0	0.00088297	0	0.00076027	0.00082162	0	7	0	4	5.5	0	0.00056026	0	0	0.00056026	0	5	0	0	5
CBLL1	E3 ubiquitin-protein ligase Hakai OS=Homo sapiens GN=CBLL1 PE=1 SV=1	1.46648	0.116035	0.00013545	0	0.00019216	0.00013213	0.000153247	2	0	3	2	2.33333	0	0	0	0.0001045	0.0001045	0	0	0	2	2
CDK13	Cyclin-dependent kinase 13 OS=Homo sapiens GN=CDK13 PE=1 SV=2	1.46447	0.0722253	0.00043985	0.00026162	0.0004576	0.00036471	0.000380945	20	14	22	17	18.25	0.00026613	0.00018972	0.0003471	0.00023755	0.000260125	15	12	22	14	15.75
LUC7L2	Putative RNA-binding protein Luc7-like 2 OS=Homo sapiens GN=LUC7L2 PE=1 SV=2	1.46352	0.00798875	0.0016117	0.0013695	0.001765	0.001986	0.00168305	19	19	22	24	21	0.0011634	0.0011586	0.0010345	0.0012435	0.00115	17	19	17	19	18
SAP18	Histone deacetylase complex subunit SAP18 OS=Homo sapiens GN=SAP18 PE=1 SV=1	1.46241	0.0791393	0.0015213	0.0012927	0.0012333	0.0019081	0.00148885	7	7	6	9	7.25	0.00070133	0.0012499	0.00077958	0.0013415	0.00101808	4	8	5	8	6.25
GNB1	Guanine nucleotide-binding protein G(I)/G(S)/G(T) subunit beta-1 OS=Homo sapiens GN=GNB1 PE=1 SV=3	1.45931	0.583213	0.0001956	0.00083103	0.00037	0.0013357	0.000683082	2	10	4	14	7.5	0.0003156	0.0012655	0.00014032	0.00015092	0.000468085	4	18	2	2	6.5
PPHLN1	Periphilin-1 OS=Homo sapiens GN=PPHLN1 PE=1 SV=2	1.45923	0.250442	0.00058083	0.00024677	0.00061801	0.00070826	0.000538468	8	4	9	10	7.75	0.00023429	0.00026096	0.0003646	0.00061618	0.000369008	4	5	7	11	6.75
APOBEC3C	DNA dC->dU-editing enzyme APOBEC-3C OS=Homo sapiens GN=APOBEC3C PE=1 SV=2	1.45756	0.130289	0.00087506	0.00059484	0.0013242	0.00085364	0.000911935	5	4	8	5	5.5	0.00070594	0.00050325	0.00075332	0.00054012	0.000625657	5	4	6	4	4.75
LBR	Lamin-B receptor OS=Homo sapiens GN=LBR PE=1 SV=2	1.45447	0.0418769	0.00059476	0.00041349	0.00066479	0.00058019	0.000563308	11	9	13	11	11	0.00043619	0.00027208	0.00046546	0.00037545	0.000387295	10	7	12	9	9.5
RPS27A	Ubiquitin-40S ribosomal protein S27a OS=Homo sapiens GN=RPS27A PE=1 SV=2	1.45274	0.0259324	0.0053289	0.0036224	0.0048384	0.0060302	0.00495498	25	20	24	29	24.5	0.0037831	0.0033711	0.0033642	0.0031247	0.00341078	22	22	22	19	21.25
TPR	Nucleoprotein TPR OS=Homo sapiens GN=TPR PE=1 SV=3	1.44907	0.0251107	0.00059103	0.00039459	0.00061223	0.00057656	0.000543602	42	33	46	42	40.75	0.00044275	0.00032371	0.00034324	0.00039086	0.00037514	39	32	34	36	35.25
PKP2	Plakophilin-2 OS=Homo sapiens GN=PKP2 PE=1 SV=2	1.4453	0.443199	0.00026421	0.00070557	0.00039268	0.00044184	0.000451075	7	22	11	12	13	0.0001827	0.00073259	0.00021662	0.00011648	0.000312098	6	27	8	4	11.25
RPA3	Replication protein A 14 kDa subunit OS=Homo sapiens GN=RPA3 PE=1 SV=1	1.44418	0.596372	0	0.0014011	0	0.00053617	0.000968635	0	6	0	2	4	0.0006651	0.00079022	0.00059145	0.00063609	0.000670715	3	4	3	3	3.25
TBL1X	F-box-like/WD repeat-containing protein TBL1X OS=Homo sapiens GN=TBL1X PE=1 SV=3	1.44281	0.0278516	0.00028815	0.00019588	0.00027253	0.00022487	0.000245357	15	12	15	14	14	0	0	0.00020672	0.00013339	0.000170055	0	0	13	15	14
RPL27A	60S ribosomal protein L27a OS=Homo sapiens GN=RPL27A PE=1 SV=2	1.44134	0.148627	0.00067403	0.00057274	0.0010625	0.0010959	0.000851292	3	3	5	5	4	0.00072502	0.00064606	0.00064473	0.0003467	0.000590627	4	4	4	2	3.5
TNRC6C	Trinucleotide repeat-containing gene 6C protein OS=Homo sapiens GN=TNRC6C PE=1 SV=3	1.44124	0.419002	0	0	5.5828e-05	0	5.5828e-05	0	0	4	0	4	0	4.2434e-05	2.8231e-05	4.5543e-05	3.8736e-05	0	3	3	4	3.33333
MCCC2	Methylcrotonoyl-CoA carboxylase beta chain, mitochondrial OS=Homo sapiens GN=MCCC2 PE=1 SV=1	1.44093	0.000495059	0.0074419	0.0084313	0.007653	0.0073749	0.00772528	126	168	137	128	139.75	0.0054319	0.0055196	0.0046608	0.0058329	0.0053613	114	130	110	128	120.5
RPL23A	60S ribosomal protein L23a OS=Homo sapiens GN=RPL23A PE=1 SV=1	1.43827	0.177481	0.0025579	0.001449	0.0014112	0.0022873	0.00192635	12	8	7	11	9.5	0.0020635	0.00091939	0.0012233	0.0011512	0.00133935	12	6	8	7	8.25
NOP56	Nucleolar protein 56 OS=Homo sapiens GN=NOP56 PE=1 SV=4	1.43686	0.00649178	0.0016234	0.0016649	0.0015354	0.0016929	0.00162915	29	35	29	31	31	0.0014452	0.0011268	0.00088352	0.0010798	0.00113383	32	28	22	25	26.75
STT3A	Dolichyl-diphosphooligosaccharide--protein glycosyltransferase subunit STT3A OS=Homo sapiens GN=STT3A PE=1 SV=2	1.43626	0.554428	9.4333e-05	0	0.00017844	0.00018405	0.000152274	2	0	4	4	3.33333	7.6102e-05	0	0.00016918	7.2782e-05	0.000106021	2	0	5	2	3
MLLT6	Protein AF-17 OS=Homo sapiens GN=MLLT6 PE=1 SV=2	1.43386	0.0882355	0.00012169	0.00015511	0.00017264	0.00023742	0.000171715	4	6	6	8	6	0	8.7481e-05	0.00013095	0.00014084	0.000119757	0	4	6	6	5.33333
MYO1C	Unconventional myosin-Ic OS=Homo sapiens GN=MYO1C PE=1 SV=4	1.43258	0.418232	0.00018769	0.00058477	0.00029586	0.00036619	0.000358627	6	22	10	12	12.5	0.00022712	0.00051721	0.00011221	0.00014481	0.000250338	9	23	5	6	10.75
RBM14	RNA-binding protein 14 OS=Homo sapiens GN=RBM14 PE=1 SV=2	1.43209	0.147719	0.00099409	0.00080246	0.00098721	0.00092126	0.000926255	20	19	21	19	19.75	0.00020049	0.00078609	0.00064184	0.00095873	0.000646787	5	22	18	25	17.5
RPL27	60S ribosomal protein L27 OS=Homo sapiens GN=RPL27 PE=1 SV=2	1.43075	0.141921	0.001956	0.0022853	0.0025437	0.0011926	0.0019944	8	11	11	5	8.75	0.0019725	0.0012304	0.0010524	0.0013205	0.00139395	10	7	6	7	7.5
RPL10	60S ribosomal protein L10 OS=Homo sapiens GN=RPL10 PE=1 SV=4	1.42637	0.012628	0.0023308	0.0022446	0.0022044	0.0025769	0.00233918	15	17	15	17	16	0.0020057	0.0013404	0.001895	0.0013187	0.00163995	16	12	17	11	14
BRCA1	Breast cancer type 1 susceptibility protein OS=Homo sapiens GN=BRCA1 PE=1 SV=2	1.42046	0.208625	0.00019634	6.0666e-05	8.4406e-05	0.00020894	0.000137588	11	4	5	12	8	0	8.9817e-05	7.6828e-05	0.00012394	9.68617e-05	0	7	6	9	7.33333
RRP7A	Ribosomal RNA-processing protein 7 homolog A OS=Homo sapiens GN=RRP7A PE=1 SV=2	1.42017	0.765665	0	0.00030273	0	0	0.00030273	0	3	0	0	3	0	0.00017074	0.00025559	0	0.000213165	0	2	3	0	2.5
KRI1	Protein KRI1 homolog OS=Homo sapiens GN=KRI1 PE=1 SV=3	1.41948	0.0450651	0.0012771	0.0011254	0.0011184	0.0013843	0.0012263	27	28	25	30	27.5	0.0012211	0.00064606	0.0007126	0.00087587	0.000863907	32	19	21	24	24
NUP50	Nuclear pore complex protein Nup50 OS=Homo sapiens GN=NUP50 PE=1 SV=2	1.41939	0.00749044	0.0020605	0.0017508	0.00168	0.002218	0.00192733	29	29	25	32	28.75	0.0012037	0.001328	0.0015292	0.0013705	0.00135785	21	26	30	25	25.5
PPAN	Suppressor of SWI4 1 homolog OS=Homo sapiens GN=PPAN PE=2 SV=1	1.41555	0.127395	0	0.00029868	0	0	0.00029868	0	5	0	0	5	0.00022686	0.00025269	0.00020173	0.00016272	0.000211	4	5	4	3	4
KRT16	Keratin, type I cytoskeletal 16 OS=Homo sapiens GN=KRT16 PE=1 SV=4	1.41416	0.392011	0.0015466	0.0010752	0.0016622	0.0011659	0.00136247	38	26	40	28	33	0.00068057	0.00035376	0.0021686	0.00065088	0.000963453	21	16	59	21	29.25
WDR5	WD repeat-containing protein 5 OS=Homo sapiens GN=WDR5 PE=1 SV=1	1.41365	0.182407	0.00079646	0.00050757	0.00075329	0.0004856	0.00063573	8	6	8	5	6.75	0.00032127	0.00028628	0.00049996	0.00069132	0.000449707	4	4	7	9	6
DROSHA	Ribonuclease 3 OS=Homo sapiens GN=DROSHA PE=1 SV=2	1.41319	0.933321	4.8402e-05	0	6.8668e-05	0	5.8535e-05	2	0	3	0	2.5	0	5.2193e-05	3.4723e-05	3.7345e-05	4.14203e-05	0	3	2	2	2.33333
TP53	Cellular tumor antigen p53 OS=Homo sapiens GN=TP53 PE=1 SV=4	1.41216	0.0182331	0.010069	0.0089151	0.010083	0.011391	0.0101145	119	124	126	138	126.75	0.0083959	0.0070557	0.0050381	0.0081602	0.00716247	123	116	83	125	111.75
VPS51	Vacuolar protein sorting-associated protein 51 homolog OS=Homo sapiens GN=VPS51 PE=1 SV=2	1.4121	0.0250139	0.0012757	0.00090329	0.0013272	0.0012859	0.00119802	30	25	33	31	29.75	0.00089191	0.0006725	0.00097617	0.000853	0.000848395	26	22	32	26	26.5
ERCC4	DNA repair endonuclease XPF OS=Homo sapiens GN=ERCC4 PE=1 SV=3	1.4111	0.0871206	0.00090754	0.00055523	0.00078968	0.00084991	0.00077559	25	18	23	24	22.5	0.00035143	0.00049583	0.00065107	0.00070021	0.000549635	12	19	25	25	20.25
KRT10	Keratin, type I cytoskeletal 10 OS=Homo sapiens GN=KRT10 PE=1 SV=6	1.40628	0.0834186	0.0074021	0.0048382	0.0070547	0.0073875	0.00667062	130	100	131	133	123.5	0.0051447	0.0031108	0.0064131	0.0043052	0.00474345	112	76	157	98	110.75
CDC5L	Cell division cycle 5-like protein OS=Homo sapiens GN=CDC5L PE=1 SV=2	1.40604	0.104617	0.001078	0.00073984	0.00074507	0.00097072	0.000883407	26	21	19	24	22.5	0.00040138	0.0005067	0.00077336	0.00083173	0.000628292	12	17	26	26	20.25
CCAR2	Cell cycle and apoptosis regulator protein 2 OS=Homo sapiens GN=CCAR2 PE=1 SV=2	1.40534	0.114318	0.00075655	0.00055102	0.00068147	0.00070289	0.000672982	21	18	20	20	19.75	0.00049408	0.00044027	0.00025845	0.0007227	0.000478875	17	17	10	26	17.5
BANF1	Barrier-to-autointegration factor OS=Homo sapiens GN=BANF1 PE=1 SV=1	1.40512	0.03857	0.0018681	0.0031747	0.0024736	0.0021868	0.0024258	5	10	7	6	7	0.0021099	0.0013429	0	0	0.0017264	7	5	0	0	6
RBM26	RNA-binding protein 26 OS=Homo sapiens GN=RBM26 PE=1 SV=3	1.4051	0.289032	9.9064e-05	0	9.3693e-05	6.4425e-05	8.57273e-05	5	0	5	7	5.66667	0	0	7.1068e-05	5.0955e-05	6.10115e-05	0	0	5	5	5
NXF1	Nuclear RNA export factor 1 OS=Homo sapiens GN=NXF1 PE=1 SV=1	1.40197	0.277141	0.00032232	9.1292e-05	0.00035565	0.00031442	0.000270921	6	2	7	6	5.25	0.00026002	0.00015447	0.00019269	0.00016579	0.000193242	6	4	5	4	4.75
DHX30	Putative ATP-dependent RNA helicase DHX30 OS=Homo sapiens GN=DHX30 PE=1 SV=1	1.40127	0.307884	0.00013925	0.0003313	0.0001317	0.00016301	0.000191315	5	14	5	6	7.5	0.00015727	0.0001001	0.00015983	0.00012892	0.00013653	7	5	8	6	6.5
PRPF40A	Pre-mRNA-processing factor 40 homolog A OS=Homo sapiens GN=PRPF40A PE=1 SV=2	1.39469	0.012006	0.00055594	0.00047239	0.00065726	0.00054233	0.00055698	16	16	20	16	17	0.0004485	0.00042463	0.00034898	0.00037532	0.000399357	16	17	14	14	15.25
H1FX	Histone H1x OS=Homo sapiens GN=H1FX PE=1 SV=1	1.3939	0.195616	0.00062446	0.0010612	0.0013289	0.00076146	0.000944005	4	8	9	5	6.5	0.0008816	0.00078559	0.00055998	0.0004818	0.000677242	7	7	5	4	5.75
[truncated: 1,974 more rows]

## Sheet: FHIP2A-C
				FHIP2A-BioID										BioID control
[truncated: 2,475 more rows]

## Sheet: FHIP2B-C
				FHIP2B-BioID										BioID control
[truncated: 1,796 more rows]

## Sheet: Hook2-C
				HOOK2-BioID										BioID control
[truncated: 1,682 more rows]

[truncated: 2 more sheets: Hook1-C Redwine et al. 2017, Hook3-C Redwine et al. 2017]
